# Supplementary material for: Divergent C2 Functionalization of N-Heteroarenes via Nonclassical Rearomatization: Retro-hetero-ene Reactions versus Sigmatropic Rearrangements
Source: Research Square preprint supplement (doi:10.21203/rs.3.rs-7578327/v1), 2025-09-16
Supplement: Supplementary file 1 [file ad611145b13391cb889f212a.docx]

**Divergent C2 Functionalization of N-Heteroarenes via Nonclassical Rearomatization: Retro-hetero-ene Reactions versus Sigmatropic Rearrangements**

Lei Huang‡, Huilong Zhu‡, Nan Wu‡, Du Luo, Yunsheng Xue, Zhou Xu*

[a] L. Huang, Dr. H. L. Zhu, Dr. N. Wu, D. Lu, Dr. Y. S. Xue, Prof. Dr. Z. Xu
The National Medical Products Administration (NMPA) Key Laboratory for Research and Evaluation of Narcotic and Psychotropic Drugs, School of Pharmacy, Xuzhou Medical University
†These authors contribute equally to this work.
E-mail: xuzhou@xzhmu.edu.cn

Tongshan Road 209, Xuzhou221004, Jiangsu, China

**Table of contents**

[1. General informations. 3](#_Toc203328343)

[2. Optimization table for one-pot synthesis of 4*H*-pyrrolo[3,2,1-*ij*]quinolines. 3](#_Toc203328344)

[3. Experimental procedures 3](#_Toc203328345)

[4. Mechanistic investigation for figure 5 7](#_Toc203328346)

[5. Mechanism investigations for figure 6 9](#_Toc203328347)

[6. Computational studies 10](#_Toc203328348)

[7. Characterization data 10](#_Toc203328349)

[8. NMR spectra 40](#_Toc203328350)

[9. Single crystal X-ray diffraction 207](#_Toc203328351)

[10. Reference 208](#_Toc203328352)

1. General informations.

Except for the preparation of some starting materials, all reactions were conducted under an argon atmosphere. Thin-layer chromatography (TLC) was performed using UV absorbance at 254 nm. Column chromatography separation was carried out using 300 – 400 mesh silica gel. NMR spectra were recorded on a JEOL ECZ400 spectrometer at 400 MHz for 1H NMR, 101 MHz for 13C NMR, and 376 MHz for 19F NMR. Proton and carbon chemical shifts are reported relative to the solvent used as an internal reference (CDCl3: δH = 7.26 ppm; δC = 77.16 ppm; DMSO-*d*6: δH = 2.50 ppm; δC = 39.52 ppm). All coupling constants (J values) were reported in Hertz (Hz). Multiplicities are reported as follows: singlet (s), doublet (d), doublet of doublets (dd), doublet of triplets(dt), doublet of quartets (dq), triplet (t), triplet of doublets (td), triplet of triplets (tt), quartet (q), pentet (p), doublet of doublets of doublets (ddd), and multiplet (m). High-resolution mass spectra (HRMS) were recorded using ESI-TOF. Tetrahydrofuran purchased from commercial sources was distilled over sodium/benzophenone and stored over sodium filaments. Unless otherwise noted, other solvents and commercially available reagents were used without further purification or analysis.

2. Optimization table for one-pot synthesis of 4*H*-pyrrolo[3,2,1-*ij*]quinolines.*a*,*b*

[a] Reaction conditions: To a flask, **1a** (0.210 mmol, 1.05 equiv.), Tf₂NH (0.205 mmol, 1.03 equiv.), and anhydrous HFIP (0.2 mL) were added and stirred for 5 min. Then, **2a** (0.2 mmol) and PPh₃AuNTf₂ (2.5 mol%) were added, and the mixture was stirred at room temperature for 4 h. The reaction mixture was concentrated, redissolved in anhydrous THF (0.6 mL), and cooled to -78 °C under an argon atmosphere. A solution of **4a** (0.4 mmol, 2.0 equiv, 1.0 M in THF) was added dropwise over 1 min at −78 °C, followed by the addition of 1 mL of saturated ammonium chloride solution.

[b] Yields were determined by ¹H NMR analysis using benzo[*d*][1,3]dioxole as an internal standard for quantification.

[c] Value in parentheses is isolated yield.

3. Experimental procedures

All starting materials, including heterocyclic nitrogen oxides, alkynes, *N*-alkenoxypyridinium salts, and Grignard reagents, were synthesized in accordance with established literature protocols.

General procedure 1

Synthesis of ortho-substituted N-heteroarenes (GP1)

To a flame-dried flask, pre-made *N*-alkenoxypyridine salt **1** (0.2 mmol) was added. The flask was refilled with argon twice, followed by the addition of anhydrous THF (0.4 mL) through a syringe. The reaction flask was then placed in a cryogenic reactor and cooled to -78 °C, and Grignard reagent **2** (0.4 mmol, 2.0 equiv.) was added dropwise over 2 min at -78 °C. After that, the flask was removed from the cryogenic reactor and allowed to warm to ambient temperature. Saturated ammonium chloride solution (1 mL) was then added to the flask at room temperature. The mixture was extracted with CH₂Cl₂, dried over Na₂SO₄, and evaporated under reduced pressure. The crude material was purified by flash chromatography on a silica gel column to afford the target products **3** and **4**.

General procedure 2

One-pot synthesis of ortho-substituted N-heteroarenes (GP2)

To a flame-dried flask, *N*-oxide (0.21 mmol, 1.05 equiv.), Tf₂NH (0.2 mmol, 1.0 equiv.), and HFIP (0.2 mL) were added, and the mixture was stirred for 5 min at room temperature. To this mixture, methyl hex-5-ynoate (0.2 mmol) and PPh₃AuNTf₂ (2.5 mol%) were added, and the mixture was diluted with HFIP (0.1 mL) under an argon atmosphere. The flask was sealed, and the mixture was stirred at room temperature for 4 h. After completion, the solvent was replaced with anhydrous THF (0.6 mL). The reaction flask was then placed in a cryogenic reactor and cooled to -78 °C, and Grignard reagent **2** (0.4 mmol, 2.0 equiv.) was added dropwise over 2 min at -78 °C. After that, the flask was removed from the cryogenic reactor and allowed to warm to ambient temperature, followed by the addition of saturated ammonium chloride solution (1 mL) at room temperature. The mixture was then extracted with CH₂Cl₂, dried over Na₂SO₄, and evaporated under reduced pressure. The crude material was purified by flash chromatography on a silica gel column to afford the target products **3** and **4**.

General procedure 3

One-pot synthesis of 4*H*-pyrrolo[3,2,1-*ij*]quinolines (GP3)

To a flame-dried flask was charged with *N*-oxide (0.21 mmol, 1.05 equiv.), Tf2NH (0.205 mmol, 1.03 equiv.), and HFIP (0.2 mL), and the mixture was stirred for 5 min. To this mixture were added alkyne (0.2 mmol) and PPh3AuNTf2 (2.5 mol%), and the mixture was diluted with HFIP (0.1 mL) under an argon atmosphere. The flask was sealed, and the mixture was stirred at room temperature for 4 h. After completion, the solvent was replaced with anhydrous THF (0.6 mL). The reaction flask was placed in a cryogenic reactor and cooled to -78 °C, and Grignard reagent (0.4 mmol, 2.0 equiv.) was added dropwise over 1 min at -78 °C, followed by stirring for another 1 min. The reaction was then quenched by the addition of 1 mL of saturated ammonium chloride solution. The mixture was then extracted with CH2Cl2, dried over Na2SO4, and evaporated under reduced pressure. The crude material was purified by flash chromatography on a silica gel column to afford the target product **5**.

Gram Scale Synthesis of 3a

To a flame-dried flask, pyridine 1-oxide (10.05 mmol, 1.01 equiv.), Tf2NH (10 mmol, 1.0 equiv.), and HFIP (10 mL) were added, and the mixture was stirred for 15 min at room temperature. To this mixture, methyl hex-5-ynoate (10 mmol) and PPh3AuNTf2 (2.5 mol%) were added, and the mixture was diluted with HFIP (2 mL) under an argon atmosphere. The flask was sealed, and the mixture was stirred at room temperature for 8 h. After completion, the solvent was replaced with anhydrous THF (12 mL). The reaction flask was placed in a cryogenic reactor and cooled to -78 °C, and Phenylmagnesium bromide (20 mmol, 2.0 equiv.) was added dropwise over 20 min at -78 °C, followed by stirring for another 2 min. After that, the flask was removed from the cryogenic reactor and allowed to warm to ambient temperature. Then, 10 mL of saturated ammonium chloride solution was poured into the flask at room temperature. The mixture was then extracted with CH2Cl2, dried over Na2SO4, and evaporated under reduced pressure. The crude material was purified by flash chromatography on a silica gel column to afford the target products **3a** and **4a**.

Gram Scale Synthesis of 5aad

To a flame-dried flask, 6-methoxyquinoline 1-oxide (6.05 mmol, 1.01 equiv.), Tf2NH (6 mmol, 1.0 equiv.), and HFIP (6 mL) were added, and the mixture was stirred for 15 min at room temperature. To this mixture, hex-5-ynenitrile (6 mmol) and PPh3AuNTf2 (2.5 mol%) were added, and the mixture was diluted with HFIP (1 mL) under an argon atmosphere. The flask was sealed, and the mixture was stirred at room temperature for 4 h. After completion, the solvent was replaced with anhydrous THF (12 mL). The reaction flask was placed in a cryogenic reactor and cooled to -78 °C. 4-fluorophenylmagnesium bromide (12 mmol, 2.0 equiv.) was added dropwise over 15 min at -78 °C, followed by stirring for another 1 min. Then, 10 mL of saturated ammonium chloride solution was poured into the flask. The mixture was then extracted with CH2Cl2, dried over Na2SO4, and evaporated under reduced pressure. The crude material was purified by flash chromatography on a silica gel column to afford the target product **5aah**.

Synthesis of product 6

To a flame-dried screw-capped tube under ambient atmosphere, O-(mesitylsulfonyl)hydroxylamine (MSH, 0.28 mmol, 2.8 equiv.), compound **3a** (0.2 mmol), oven-dried 4Å molecular sieves (80 mg), and anhydrous CH2Cl2 (0.5 mL) were added. The mixture was stirred for 1 h in a preheated oil bath at 40 °C. The reaction was cooled down to 25 °C. Allyl carbonochloridate (42 µL, 0.4 mmol, 2.0 equiv.) and Triethylamine (NEt₃, 84 µL, 0.6 mmol, 3.0 equiv.) were added sequentially. The mixture was stirred and irradiated in a well-ventilated photochemical reactor at 365 nm for 16 h. After completion, the mixture was extracted with CH2Cl2, dried over Na2SO4, and evaporated under reduced pressure. The crude material was purified by flash chromatography on a silica gel column to afford the target product **6**.

Synthesis of products 7 - 12

To a flame-dried flask, pyridine 1-oxide-*d5* (0.21 mmol, 1.05 equiv.), Tf₂NH (0.2 mmol, 1.0 equiv.), and HFIP (0.2 mL) were added, and the mixture was stirred for 5 min at room temperature. To this mixture, alkyne (0.2 mmol) and PPh₃AuNTf₂ (2.5 mol%) were added, and the mixture was diluted with HFIP (0.1 mL) under an argon atmosphere. The flask was sealed, and the mixture was stirred at room temperature for 4 h. After completion, the solvent was replaced with anhydrous THF (0.6 mL). The reaction flask was then placed in a cryogenic reactor and cooled to -78 °C, and Phenylmagnesium bromide **2** (0.4 mmol, 2.0 equiv.) was added dropwise over 2 min at -78 °C. After that, the reaction was quenched with 1 mL of saturated ammonium chloride solution at -78 °C. The mixture was then extracted with CH₂Cl₂, dried over Na₂SO₄, and evaporated under reduced pressure. The crude material was purified by flash chromatography on a silica gel column to afford the target products **3a-D** and **7-12**.

Synthesis of product 13

To a vial equipped with a stir bar, **5aah** (0.2 mmol) and dimethyl sulfoxide (2 mL) were added. The mixture was stirred for 5 min. Then, hydrogen peroxide (0.012 mmol, 0.06 equiv, 30% in water) and potassium carbonate (0.3 mmol, 1.5 equiv.) were added to the vial at 0 °C. The mixture was stirred for another 12 h at room temperature. After completion, the mixture was extracted with CH2Cl2, dried over Na2SO4, and evaporated under reduced pressure. The crude material was purified by flash chromatography on a silica gel column to afford the target product **13**.

Synthesis of product 14

To a vial equipped with a stir bar, **5aah** (0.2 mmol)**,** *N*-bromosuccinimide (0.3 mmol, 1.5 equiv.), dimethyl sulfoxide (2 mL) and water (0.2 mL) were added sequentially. The mixture was stirred in air for 10 min. After that, the mixture was extracted with CH2Cl2, dried on Na2SO4, and evaporated under pressure reduction. The crude material was purified by flash chromatography on a silica gel column to afford the target product **14**.

Synthesis of product 15

To a vial equipped with a stir bar, **5aah** (0.2 mmol), ammonium thiocyanate (0.4 mmol, 2.0 equiv.), ammonium persulfate (0.4 mmol, 2.0 equiv.), ferric chloride (0.04 mmol, 0.2 equiv.), and acetonitrile (2 mL) were added sequentially. The mixture was stirred for 8 h at room temperature. Then, the mixture was extracted with CH2Cl2, dried over Na2SO4, and evaporated under reduced pressure. The crude material was purified by flash chromatography on a silica gel column to afford the target product **15**.

4. Mechanistic investigation for figure 5

**Experiment (A): Deuterium Labeling Experiments**

To a flame-dried flask, the pre-made *N*-alkenoxypyridine salt (either **1a-D** or **1a**, 0.2 mmol) was added. The flask was then purged with argon (two cycles), followed by the addition of anhydrous THF (0.4 mL) via syringe. The reaction flask was placed in a cryogenic reactor and cooled to -78 °C. Phenylmagnesium bromide (0.4 mmol, 2.0 equiv.) was added dropwise over 2 min at -78 °C. After that, the flask was removed from the cryogenic reactor and allowed to warm to room temperature. Then, either H₂O or D₂O was added to the flask at room temperature. The mixture was then extracted with CH₂Cl₂, dried over Na₂SO₄, and evaporated under reduced pressure. The crude material was purified by flash chromatography on a silica gel column to afford the target products **3a-D**, **4a-D**, **3a** and **4a**.

**Experiment (B): Quenching Reaction at -7****8 °C**

To a flame-dried flask, pre-made *N*-alkenoxypyridine salt **1a** (0.2 mmol) was added. The flask was then refilled with argon twice, followed by the addition of anhydrous THF (0.4 mL) through a syringe. The reaction flask was placed in a cryogenic reactor and cooled to -78 °C, and Phenylmagnesium bromide (0.4 mmol, 2.0 equiv.) was added dropwise over 2 min at -78 °C. After that, 1 mL of saturated ammonium chloride solution was added to the flask at -78 °C. The mixture was then extracted with CH₂Cl₂, dried over Na₂SO₄, and evaporated under reduced pressure. The crude material was purified by flash chromatography on a silica gel column to afford the target products **3a** and **4a**.

Experiment (C): Kinetic isotope Effect (KIE) Experiment

To a flame-dried flask, pre-made *N*-alkenoxypyridine salts **1a** (0.2 mmol) and **1a-D** (0.2 mmol) were added. The flask was then refilled with argon twice, followed by the addition of anhydrous THF (0.8 mL) through a syringe. The reaction flask was placed in a cryogenic reactor and cooled to -78 °C, and Phenylmagnesium bromide (0.2 mmol,1.0 equiv.) was added dropwise over 2 min at -78 °C. After that, 1 mL of saturated ammonium chloride solution was added to the flask at -78 °C. The mixture was then extracted with CH₂Cl₂, dried over Na₂SO₄, and evaporated under reduced pressure. The crude material was purified by flash chromatography on a silica gel column to afford the target products **3a** and **3a-D**.

Experiment (D): Control Experiment

To a flame-dried flask, pre-made substrate (0.2 mmol, 1.0 equiv.) was added. The flask was then refilled with argon twice, followed by the addition of anhydrous THF (0.4 mL) through a syringe. The reaction flask was placed in a cryogenic reactor and cooled to -78 °C, and phenylmagnesium bromide (0.4 mmol, 2.0 equiv.) was added dropwise over 2 min at -78 °C. After that, the flask was removed from the cryogenic reactor and allowed to warm to ambient temperature, followed by the addition of saturated ammonium chloride solution (1 mL) at room temperature. The mixture was then extracted with CH₂Cl₂, dried over Na₂SO₄, and evaporated under reduced pressure. The crude material was purified by flash chromatography on a silica gel column to afford the ring-open product.

**5. Mechanism investigations for figure 6**

Control experiments (A)

To a flame-dried flask, compound **3a''** (0.2 mmol) and anhydrous THF (0.6 mL) were added, and the mixture was stirred and cooled to -78 °C. Phenylmagnesium bromide (0.4 mmol, 2.0 equiv.) was added dropwise over 1 min at -78 °C, followed by stirring for another 1 min. Then, 1 mL of saturated ammonium chloride solution was added to the flask. The crude material was finally purified by flash chromatography to afford the target product **5a**.

**Control experiments (B**)

To a flame-dried flask, 8-methoxyquinoline 1-oxide (0.21 mmol, 1.05 equiv.), Tf2NH (0.205 mmol, 1.03 equiv.), and HFIP (0.2 mL) were added, and the mixture was stirred for 5 min at room temperature. To this mixture, compound **2a** (0.2 mmol) and PPh3AuNTf2 (2.5 mol%) were added, and the mixture was diluted with HFIP (0.1 mL) under an argon atmosphere. The flask was sealed, and the mixture was stirred at room temperature for 4 h. After completion, the solvent was replaced with anhydrous THF (0.6 mL) and cooled to -78 °C. Phenylmagnesium bromide (0.4 mmol, 2.0 equiv.) was added dropwise over 1 min at -78 °C. Then, 1 mL of saturated ammonium chloride solution was added to the flask. The crude material was finally purified by flash chromatography to afford the target product **22**.

Control experiments (C)

To a flame-dried flask, **1a** (0.21 mmol, 1.05 equiv.), Tf2NH (0.205 mmol, 1.03 equiv.), and HFIP (0.2 mL) were added, and the mixture was stirred for 5 min at room temperature. To this mixture, 3,3-dimethylbut-1-yne (0.2 mmol) and PPh3AuNTf2 (2.5 mol%) were added, and the mixture was diluted with HFIP (0.1 mL) under an argon atmosphere. The flask was sealed, and the mixture was stirred at room temperature for 4 h. After completion, the solvent was replaced with anhydrous THF (0.6 mL) and cooled to -78 °C. Phenylmagnesium bromide (0.4 mmol, 2.0 equiv.) was added dropwise over 1 min at -78 °C. Then, 1 mL of saturated ammonium chloride solution was added to the flask. The crude material was finally purified by flash chromatography to afford the target products **5aai** and **23**.

Control experiments (D)

To a flame-dried flask, compound **3a****''** (0.2 mmol) and anhydrous THF (0.6 mL) were added. The mixture was stirred and cooled to -78 °C. [1,1'-biphenyl]-4-ylmagnesium bromide (0.4 mmol, 2.0 equiv.) was added dropwise over 1 min at -78 °C, followed by stirring for another 1 min. Then, 1 mL of saturated ammonium chloride solution was added to the flask. The crude material was finally purified by flash chromatography to afford the target products **5ah** and **24**.

6. Computational studies

All calculations[18] were carried out using density functional theory (DFT) in Gaussian 09 package.Geometrical optimization of the studied species were performed using M06-2X functional with 6-31G(d,p) basis set in the gas phase. Vibrational frequency calculation was performed at the same level of theory to confirm the stationary points as real minima (NIMAG = 0) or transition state (TS) (NIMAG = 1). Based on the optimized geometries, the energies were further improved by M06-2X/6-311++G(d,p) single-point calculations considering the solvent effect. Intrinsic reaction coordinate (IRC) analysis was performed to ensure that TS properly connects reactant and product. SMD solvation model was used to take into account the solvent effect. 3D representations of the optimized structures were prepared using CYLView.

7. Characterization data

**1-((6-methoxy-6-oxohex-1-en-2-yl)oxy)pyridin-1-ium bis((trifluoromethyl)sulfonyl)amide (1a)**

Prepared according toliterature.[2] Yellow viscous liquid (924.4 mg, 92%, 2 mmol scale);**1H NMR** (400 MHz, Chloroform-*d*) δ 8.96 (d, *J* = 5.9 Hz, 2H), 8.72 – 8.66 (m, 1H), 8.33 – 8.27 (m, 2H), 4.56 (d, *J* = 5.6 Hz, 1H), 3.75 (d, *J* = 5.6 Hz, 1H), 3.67 (s, 3H), 2.51 – 2.42 (dt, *J* = 13.2, 7.1 Hz, 4H), 2.05 – 1.95 (m, 2H). **13C NMR** (101 MHz, Chloroform-*d*) δ 173.7, 165.0, 147.0, 142.3, 130.5, 119.9 (q, *J*C-F = 321.2 Hz), 89.8, 51.9, 32.8, 30.7, 21.5. **19F NMR** (376 MHz, Chloroform-*d*) δ -80.3. **HRMS**(ESI+) m/z calcd. for [C12H16NO3]+[M-NTf2-]+: 222.1126, found: 222.1125.

**1-((6-methoxy-6-oxohex-1-en-2-yl)oxy)pyridin-1-ium-2,3,4,5,6-d5 bis((trifluoromethyl)sulfonyl)amide (1a-D)**

Prepared according toliterature.[2] Yellow viscous liquid (912.3 mg, 90%, 2 mmol scale); **1H NMR** (400 MHz, Chloroform-*d*) δ 4.53 (d, *J* = 5.5 Hz, 1H), 3.71 (d, *J* = 5.6 Hz, 1H), 3.64 (s, 3H), 2.44 (dt, *J* = 13.8, 7.2 Hz, 4H), 1.96 (p, *J* = 7.2 Hz, 2H). **13C NMR** (101 MHz, Chloroform-*d*) δ 173.7, 165.0, 146.5 (t, *J*C-D = 26.2 Hz), 141.9 (t, *J*C-D = 30.2 Hz), 129.1 (t, *J*C-D = 27.0 Hz), 123.0 (d, *J*C-F = 321.2 Hz), 89.7, 51.8, 32.8, 30.6, 21.5. **19F NMR** (376 MHz, Chloroform-*d*) δ -80.3. **HRMS**(ESI+) m/z calcd. for [C12H11D5NO3]+[M-NTf2-]+: 227.1439, found: 227.1443.

**1-((6-methoxy-6-oxohex-1-en-2-yl)oxy)-4-phenylpyridin-1-ium bis((trifluoromethyl)sulfonyl)amide (1y)**

Prepared according toliterature.[2] Yellow viscous liquid (1041.7 mg, 90%, 2 mmol scale); **1H NMR** (400 MHz, Chloroform-*d*) δ 8.90 (d, *J* = 7.2 Hz, 2H), 8.41 (d, *J* = 7.2 Hz, 2H), 7.89 (dd, *J* = 8.1, 1.5 Hz, 2H), 7.67 – 7.57 (m, 3H), 4.55 (d, *J* = 5.5 Hz, 1H), 3.85 (d, *J* = 5.4 Hz, 1H), 3.67 (s, 3H), 2.52 – 2.43 (m, 4H), 2.00 (p, *J* = 7.2 Hz, 2H). **13C NMR** (101 MHz, Chloroform-*d*) δ 173.7, 164.8, 158.3, 141.9, 133.5, 132.9, 130.3, 128.5, 126.6, 120.0 (q, *J*C-F = 321.5 Hz), 89.8, 51.9, 32.8, 30.8, 21.6. **19F NMR** (376 MHz, Chloroform-*d*) δ -80.1.**HRMS**(ESI+) m/z calcd. for [C18H20NO3]+[M-NTf2-]+: 298.1438, found: 298.1438.

**1-((6-methoxy-6-oxohex-1-en-2-yl)oxy)-4-(methoxycarbonyl)pyridin-1-ium bis((trifluoromethyl)sulfonyl)amide (1z)**

Prepared according toliterature.[2] Yellow viscous liquid (898.6 mg, 81%, 2 mmol scale); **1H NMR** (400 MHz, Chloroform-*d*) δ 9.14 (d, *J* = 7.0 Hz, 2H), 8.68 (d, *J* = 7.0 Hz, 2H), 4.60 (d, *J* = 5.7 Hz, 1H), 4.06 (s, 3H), 3.88 (d, *J* = 5.7 Hz, 1H), 3.65 (s, 3H), 2.45 (dt, *J* = 17.0, 7.2 Hz, 4H), 1.98 (q, *J* = 7.1 Hz, 2H). **13C NMR** (101 MHz, Chloroform-*d*) δ 173.7, 165.1, 161.2, 145.7, 143.6, 130.0, 119.8 (q,*J*C-F = 321.3 Hz), 90.8, 54.5, 51.8, 32.7, 30.6, 21.4. **19F NMR** (376 MHz, Chloroform-*d*) δ -80.4. **HRMS**(ESI+) m/z calcd. for [C14H18NO5]+[M-NTf2-]+: 280.1179, found: 280.1179.

**4-chloro-1-((6-methoxy-6-oxohex-1-en-2-yl)oxy)pyridin-1-ium bis((trifluoromethyl)sulfonyl)amide (1aa)**

Prepared according toliterature.[2] Yellow viscous liquid (859.5 mg, 80%, 2 mmol scale); **1H NMR** (400 MHz, Chloroform-*d*) δ 8.95 (d, *J* = 6.8 Hz, 2H), 8.19 (d, *J* = 6.8 Hz, 2H), 4.57 (d, *J* = 5.6 Hz, 1H), 3.85 (d, *J* = 5.6 Hz, 1H), 3.66 (s, 3H), 2.49 – 2.40 (m, 4H), 2.02 – 1.92 (m, 2H). **13C NMR** (101 MHz, Chloroform-*d*) δ 173.8, 164.9, 155.8, 143.2, 130.7, 119.8 (q, *J*C-F= 321.2 Hz), 90.3, 51.9, 32.8, 30.7, 21.4. **19F NMR** (376 MHz, Chloroform-*d*) δ -80.3. **HRMS**(ESI+) m/z calcd. for [C12H15ClNO3]+[M-NTf2-]+: 256.0735, found: 256.0735.

**4-bromo-1-((6-methoxy-6-oxohex-1-en-2-yl)oxy)pyridin-1-ium bis((trifluoromethyl)sulfonyl)amide (1ab)**

Prepared according toliterature.[2] Brown viscous liquid (906.5 mg, 78%, 2 mmol scale); **1H NMR** (400 MHz, Chloroform-*d*) δ 8.78 (d, *J* = 7.0 Hz, 2H), 8.32 (d, *J* = 7.0 Hz, 2H), 4.52 (d, *J* = 5.4 Hz, 1H), 3.80 (d, *J* = 5.5 Hz, 1H), 3.60 (s, 3H), 2.39 (dt, *J* = 11.4, 7.1 Hz, 4H), 1.91 (m, 2H). **13C NMR** (101 MHz, Chloroform-*d*) δ 173.5, 164.7, 145.0, 142.5, 133.8, 119.7 (q, *J*C-F = 321.2 Hz), 90.0, 51.7, 32.6, 30.4, 21.3. **19F NMR** (376 MHz, Methanol-*d*4) δ -80.5. **HRMS**(ESI+) m/z calcd. for [C12H15BrNO3]+[M-NTf2-]+: 300.0230, found: 300.0237.

**4-methoxy-1-((6-methoxy-6-oxohex-1-en-2-yl)oxy)pyridin-1-ium bis((trifluoromethyl)sulfonyl)amide (1ac)**

Prepared according toliterature.[2] Yellow viscous liquid (968.2 mg, 91%, 2 mmol scale); **1H NMR** (400 MHz, Chloroform-*d*) δ 8.63 (d, *J* = 7.8 Hz, 2H), 7.57 (d, *J* = 7.8 Hz, 2H), 4.47 (d, *J* = 5.4 Hz, 1H), 4.19 (s, 3H), 3.75 (d, *J* = 5.4 Hz, 1H), 3.66 (s, 3H), 2.43 (t, *J* = 7.0 Hz, 5H), 1.96 (p, *J* = 7.1 Hz, 2H). **13C NMR** (101 MHz, Chloroform-*d*) δ 173.7, 171.8, 164.4, 143.2, 119.9 (q, *J*C-F = 321.3 Hz), 114.9, 88.8, 59.0, 51.8, 32.8, 30.7, 21.6. **19F NMR** (376 MHz, Chloroform-*d*) δ -80.2. **HRMS**(ESI+) m/z calcd. for [C13H18NO4]+[M-NTf2-]+: 252.1230, found: 252.1236.

**1-((6-methoxy-6-oxohex-1-en-2-yl)oxy)-4-phenoxypyridin-1-ium bis((trifluoromethyl)sulfonyl)amide (1ad)**

Prepared according toliterature.[2] Yellow viscous liquid (1047.1 mg, 88%, 2 mmol scale); **1H NMR** (400 MHz, Chloroform-*d*) δ 8.69 (d, *J* = 7.8 Hz, 2H), 7.53 (t, *J* = 8.0 Hz, 2H), 7.46 – 7.38 (m, 3H), 7.22 – 7.18 (m, 2H), 4.49 (d, *J* = 5.4 Hz, 1H), 3.83 (d, *J* = 5.4 Hz, 1H), 3.64 (s, 3H), 2.41 (td, *J* = 7.2, 2.0 Hz, 4H), 1.95 (p, *J* = 7.1 Hz, 2H). **13C NMR** (101 MHz, Chloroform-*d*) δ 173.7, 170.7, 164.4, 151.9, 144.0, 131.4, 128.2, 120.6, 119.9 (q, *J*C-F = 321.4 Hz), 116.0, 89.2, 51.8, 32.8, 30.6, 21.5. **19F NMR** (376 MHz, Chloroform-*d*) δ -80.3. **HRMS**(ESI+) m/z calcd. for [C18H20NO4]+[M-NTf2-]+: 314.1387, found: 314.1393.

**1-((6-methoxy-6-oxohex-1-en-2-yl)oxy)-4-methylpyridin-1-ium bis((trifluoromethyl)sulfonyl)amide (1ae)**

Prepared according toliterature.[2] Yellow viscous liquid (919.6 mg, 89%, 2 mmol scale); **1H NMR** (400 MHz, Chloroform-*d*) δ 8.73 (d, *J* = 6.9 Hz, 2H), 8.04 (d, *J* = 7.0 Hz, 2H), 4.52 (d, *J* = 5.5 Hz, 1H), 3.77 (d, *J* = 5.5 Hz, 1H), 3.67 (s, 3H), 2.77 (s, 3H), 2.45 (q, *J* = 7.2 Hz, 4H), 1.99 (p, *J* = 7.2 Hz, 2H). **13C NMR** (101 MHz, Chloroform-*d*) δ 173.8, 164.7, 161.8, 140.9, 130.7, 119.9 (q, *J*C-F = 321.2 Hz), 89.6, 51.9, 32.8, 30.8, 22.6, 21.6. **19F NMR** (376 MHz, Chloroform-*d*) δ -78.8. **HRMS**(ESI+) m/z calcd. for [C13H18NO3]+[M-NTf2-]+: 236.1281, found: 236.1289.

**1-((6-methoxy-6-oxohex-1-en-2-yl)oxy)-3-methylpyridin-1-ium bis((trifluoromethyl)sulfonyl)amide (1af)**

Prepared according toliterature.[2] Yellow viscous liquid (928.9 mg, 90%, 2 mmol scale); **1H NMR** (400 MHz, Chloroform-*d*) δ 8.72 (d, *J* = 5.1 Hz, 2H), 8.43 (d, *J* = 8.0 Hz, 1H), 8.13 – 8.03 (m, 1H), 4.50 (d, *J* = 5.5 Hz, 1H), 3.73 (d, *J* = 5.4 Hz, 1H), 3.63 (s, 3H), 2.63 (s, 3H), 2.46 – 2.36 (m, 4H), 1.97 – 1.89(m, 2H). **13C NMR** (101 MHz, Chloroform-*d*) δ 173.6, 164.7, 147.6, 141.1, 139.2, 129.3, 119.8 (q, *J*C-F = 321.3 Hz), 89.7, 51.7, 32.7, 30.5, 21.5, 18.5. **19F NMR** (376 MHz, Chloroform-*d*) δ -80.4. **HRMS**(ESI+) m/z calcd. for [C13H18NO3]+[M-NTf2-]+: 236.1281, found: 236.1284.

**1-((6-methoxy-6-oxohex-1-en-2-yl)oxy)-2-phenylpyridin-1-ium bis((trifluoromethyl)sulfonyl)amide (1ag)**

Prepared according toliterature.[2] Yellow viscous liquid (959.7 mg, 83%, 2 mmol scale); **1H NMR** (400 MHz, Chloroform-*d*) δ 8.92 (dd, *J* = 7.1, 1.3 Hz, 1H), 8.69 (td, *J* = 7.9, 1.2 Hz, 1H), 8.21 – 8.10 (m, 2H), 7.73 – 7.67 (m, 2H), 7.67 – 7.52 (m, 3H), 4.29 (d, *J* = 5.6 Hz, 1H), 3.62 (s, 3H), 3.53 (d, *J* = 5.6 Hz, 1H), 2.18 (t, *J* = 7.4 Hz, 2H), 2.07 (t, *J* = 7.2 Hz, 2H), 1.62 (p, *J* = 7.3 Hz, 2H). **13C NMR** (101 MHz, Chloroform-*d*) δ 173.2, 163.3, 153.5, 147.3, 142.9, 132.9, 131.6, 129.7, 129.5, 128.6, 127.3, 119.9 (q, *J*C-F = 321.4 Hz), 88.9, 51.7, 32.3, 30.4, 21.3. **19F NMR** (376 MHz, Chloroform-*d*) δ -80.2. **HRMS**(ESI+) m/z calcd. for [C18H20NO3]+[M-NTf2-]+: 298.1438, found: 298.1440.

**1-((6-methoxy-6-oxohex-1-en-2-yl)oxy)-2-methylpyridin-1-ium bis((trifluoromethyl)sulfonyl)amide (1ah)**

Prepared according toliterature.[2] Yellow viscous liquid (900.2 mg, 87%, 2 mmol scale); **1H NMR** (400 MHz, Chloroform-*d*) δ 8.76 (d, *J* = 6.6 Hz, 1H), 8.48 (t, *J* = 8.5 Hz, 1H), 8.10 (d, *J* = 9.3 Hz, 1H), 8.02 (t, *J* = 7.9 Hz, 1H), 4.48 (d, *J* = 5.6 Hz, 1H), 3.64 (s, 3H), 3.54 (d, *J* = 5.6 Hz, 1H), 2.76 (s, 3H), 2.44 (dt, *J* = 19.4, 7.3 Hz, 4H), 1.97 (p, *J* = 7.2 Hz, 2H). **13C NMR** (101 MHz, Chloroform-*d*) δ 173.4, 162.9, 153.9, 146.5, 142.1, 131.6, 127.9, 119.8 (q, *J*C-F = 321.4 Hz), 88.4, 51.8, 32.8, 30.4, 21.7, 17.2. **19F NMR** (376 MHz, Chloroform-*d*) δ -80.5. **HRMS**(ESI+) m/z calcd. for [C13H18NO3]+[M-NTf2-]+: 236.1281, found: 236.1285.

**2-methoxy-1-((6-methoxy-6-oxohex-1-en-2-yl)oxy)pyridin-1-ium bis((trifluoromethyl)sulfonyl)amide (1ai)**

Prepared according toliterature.[2] Yellow viscous liquid (905.0 mg, 85%, 2 mmol scale); **1H NMR** (400 MHz, Chloroform-*d*) δ 8.54 (ddd, *J* = 9.1, 7.5, 1.8 Hz, 1H), 8.43 (dd, *J* = 6.8, 1.7 Hz, 1H), 7.84 (dd, *J* = 9.0, 1.4 Hz, 1H), 7.66 – 7.59 (m, 1H), 4.42 (d, *J* = 5.5 Hz, 1H), 4.37 (s, 3H), 3.71 – 3.66 (m, 4H), 2.44 (dt, *J* = 9.0, 7.3 Hz, 4H), 1.98 (p, *J* = 7.4 Hz, 2H). **13C NMR** (101 MHz, Chloroform-*d*) δ 173.6, 162.7, 158.3, 149.1, 140.0, 119.93, 119.89 (q, *J*C-F = 321.3 Hz), 113.9, 87.9, 60.6, 51.9, 32.7, 30.6, 21.8. **19F NMR** (376 MHz, Chloroform-*d*) δ -78.8.**HRMS**(ESI+) m/z calcd. for [C13H18NO4]+[M-NTf2-]+: 252.1230, found: 252.1234.

**1-((6-methoxy-6-oxohex-1-en-2-yl)oxy)-2-(thiophen-2-yl)pyridin-1-ium bis((trifluoromethyl)sulfonyl)**

**amide (1aj)**

Prepared according toliterature.[2] Yellow viscous liquid (817.6 mg, 70%, 2 mmol scale); **1H NMR** (400 MHz, Chloroform-*d*) δ 8.75 (d, *J* = 6.7 Hz, 1H), 8.53 (d, *J* = 4.8 Hz, 2H), 8.16 (dd, *J* = 4.1, 1.1 Hz, 1H), 7.96 – 7.90 (m, 2H), 7.32 (dd, *J* = 5.0, 4.1 Hz, 1H), 4.45 (d, *J* = 5.7 Hz, 1H), 3.67 (d, *J* = 5.7 Hz, 1H), 3.65 (s, 3H), 2.52 (t, *J* = 7.6 Hz, 2H), 2.41 (t, *J* = 7.1 Hz, 2H), 1.97 (p, *J* = 7.2 Hz, 2H).**13C NMR** (101 MHz, Chloroform-*d*) δ 173.5, 163.2, 147.1, 145.8, 142.0, 137.2, 136.6, 129.4, 128.5, 126.5, 126.4, 119.9 (q, *J*C-F = 321.3 Hz), 89.5, 51.8, 32.8, 30.8, 21.4. **19F NMR** (376 MHz, Chloroform-*d*) δ -80.2. **HRMS**(ESI+) m/z calcd. for [C16H18NO3S]+[M-NTf2-]+: 304.1002, found: 304.1006.

**2-((6-methoxy-6-oxohex-1-en-2-yl)oxy)isoquinolin-2-ium bis((trifluoromethyl)sulfonyl)amide (1ak)**

Prepared according toliterature.[2] Yellow viscous liquid (1104.5 mg, 98%, 2 mmol scale); **1H NMR** (400 MHz, Chloroform-*d*) δ 9.92 (s, 1H), 8.65 – 8.51 (m, 3H), 8.34 – 8.23 (m, 2H), 8.13 – 8.06 (m, 1H), 4.55 (d, *J* = 5.4 Hz, 1H), 3.73 (d, *J* = 5.3 Hz, 1H), 3.68 (s, 3H), 2.50 (dt, *J* = 19.6, 7.2 Hz, 4H), 2.04 (p, *J* = 7.2 Hz, 2H). **13C NMR** (101 MHz, Chloroform-*d*) δ 173.8, 165.0, 146.0, 138.7, 137.6, 132.8, 132.3, 131.3, 128.7, 128.1, 127.9, 119.9 (q, *J*C-F = 321.3 Hz), 89.6, 51.8, 32.9, 30.7, 21.6. **19F NMR** (376 MHz, Chloroform-*d*) δ -80.3. **HRMS**(ESI+) m/z calcd. for [C16H18NO3]+[M-NTf2-]+: 272.1281, found: 272.1280.

**1-((4-phenylbut-1-en-2-yl)oxy)quinolin-1-ium bis((trifluoromethyl)sulfonyl)amide (3a****'')**

Prepared according to literature. Brown solid (109.2 mg, 98%, 0.2 mmol scale);**1H NMR** (400 MHz, Chloroform-*d*) δ 9.19 (d, *J* = 7.2 Hz, 2H), 8.40 (d, *J* = 8.2 Hz, 1H), 8.23–8.18 (m, 1H), 8.17–8.11 (m, 1H), 8.02 (t, *J* = 7.7 Hz, 1H), 7.84 –7.80 (m, 1H), 7.39–7.27 (m, 5H), 4.48 (d, *J* = 5.6 Hz, 1H), 3.52 (d, *J* = 5.6 Hz, 1H), 3.09 (t, *J* = 7.6 Hz, 2H), 2.94 (t, *J* = 7.6 Hz, 2H). **13C NMR** (101 MHz, Chloroform-*d*) δ 164.3, 148.5, 145.1, 139.6, 137.9, 136.3, 131.8, 131.2, 130.7, 128.9, 128.7, 126.8, 122.6, 119.7 (q, *J*C-F = 287.4 Hz), 116.2, 89.1, 33.0, 32.5.**19F NMR** (376 MHz, Chloroform-*d*) δ -80.2.**HRMS(ESI+)** m/z calcd. for [C19H18NO]+[M-NTf2-]+: 276.1383, found: 276.1383.

**2-phenylpyridine (3a)**

Prepared according to **GP1**. Colorless liquid (27.1 mg, 87%, 0.2 mmol scale); **1H NMR** (400 MHz, Chloroform-*d*) δ 8.70 (dt, *J* = 4.8, 1.5 Hz, 1H), 8.03 – 7.96 (m, 2H), 7.80 – 7.70 (m, 2H), 7.52 – 7.46 (m, 2H), 7.45 – 7.39 (m, 1H), 7.24 (ddd, *J* = 6.7, 4.8, 2.0 Hz, 1H). **13C NMR** (101 MHz, Chloroform-*d*) δ 157.6, 149.8, 139.5, 136.9, 129.1, 128.9, 127.1, 122.2, 120.7. **HRMS**(ESI+) m/z calcd. for C11H9N+ [M+H]+: 156.0808, found: 156.0807.

**methyl 5-oxo-6-(6-phenylpyridin-3-yl)hexanoate (3a')**

Prepared according to **GP1**, quenched at -78 °C. White solid (23.8 mg, 4%, 2 mmol scale); **1H NMR** (400 MHz, Chloroform-*d*) δ 8.51 (d, *J* = 1.8 Hz, 1H), 8.03 – 7.89 (m, 2H), 7.70 (d, *J* = 8.1 Hz, 1H), 7.60 (dd, *J* = 8.1, 2.2 Hz, 1H), 7.51 – 7.39 (m, 3H), 3.74 (s, 2H), 3.64 (s, 3H), 2.61 (t, *J* = 7.2 Hz, 2H), 2.33 (t, *J* = 7.2 Hz, 2H), 1.92 (p, *J* = 7.2 Hz, 2H). **13C NMR** (101 MHz, Chloroform-*d*) δ 206.5, 173.6, 156.5, 150.4, 139.1, 137.9, 129.1, 128.9, 128.2, 127.0, 120.5, 51.7, 46.5, 41.3, 32.9, 18.9. **HRMS**(ESI+) m/z calcd. for C18H19NO3+ [M+H]+: 298.1438, found: 298.1436.

**2-phenylpyridine-3,4,5,6-d4 (3a-D)**

Prepared according to **GP1**. Colorless liquid (27.8 mg, 87%, 0.2 mmol scale); **1H NMR** (400 MHz, Chloroform-*d*) δ 6.55 – 6.48 (m, 2H), 6.04 – 5.97 (m, 2H), 5.97 – 5.91 (m, 1H). **13C NMR** (101 MHz, Chloroform-*d*) δ 157.6, 149.6 (t, *J*C-D = 27.1 Hz), 139.5, 136.1 (t, *J*C-D = 24.7 Hz), 129.1, 128.9, 127.0, 121.9 (t, *J*C-D = 25.3 Hz), 120.4 (t, *J*C-D = 27.1 Hz). **HRMS**(ESI+) m/z calcd. for C11H5D4N+ [M+H]+: 160.1059, found: 160.1057.

**2-(p-tolyl)pyridine (3b)**

Prepared according to **GP1**. Pale-yellow liquid (29.5 mg, 87%, 0.2 mmol scale); **1H NMR** (400 MHz, Chloroform-*d*) δ 8.68 (dt, *J* = 4.8, 1.2 Hz, 1H), 7.90 (d, *J* = 8.2 Hz, 2H), 7.75 – 7.67 (d, *J* = 6.3 Hz, 2H), 7.29 (d, *J* = 8.3 Hz, 2H), 7.22 – 7.15 (m, 1H). **13C NMR** (101 MHz, Chloroform-*d*) δ 157.6, 149.7, 139.1, 136.82, 136.76, 129.6, 126.9, 121.9, 120.4, 21.4. **HRMS**(ESI+) m/z calcd. for C12H11N+ [M+H]+: 170.0964, found: 170.0970.

**2-([1,1'-biphenyl]-4-yl)pyridine (3c)**

Prepared according to **GP1**. White solid (39.4 mg, 85%, 0.2 mmol scale); **1H NMR** (400 MHz, Chloroform-*d*) δ 8.73 (d, *J* = 5.7 Hz, 1H), 8.09 (d, *J* = 8.6 Hz, 2H), 7.81 – 7.70 (m, 4H), 7.67 (d, *J* = 8.4 Hz, 2H), 7.47 (t, *J* = 7.5 Hz, 2H), 7.38 (t, *J* = 7.4 Hz, 1H), 7.26 – 7.22 (m, 1H). **13C NMR** (101 MHz, Chloroform-*d*) δ 157.2, 149.8, 141.9, 140.7, 138.4, 136.9, 129.0, 127.7, 127.6, 127.4, 127.2, 122.3, 120.6. **HRMS**(ESI+) m/z calcd. for C17H13N+ [M+H]+: 232.1121, found: 232.1119.

**2-(4-(trifluoromethyl)phenyl)pyridine (3d)**

Prepared according to **GP1**. White solid (32.2 mg, 72%, 0.2 mmol scale); **1H NMR** (400 MHz, Chloroform-*d*) δ 8.73 (dt, *J* = 4.9, 1.4 Hz, 1H), 8.11 (d, *J* = 8.2 Hz, 2H), 7.83 – 7.69 (m, 4H), 7.30 (ddd, *J* = 6.8, 4.8, 1.6 Hz, 1H). **13C NMR** (101 MHz, Chloroform-*d*) δ 156.0, 150.1, 142.8, 137.2, 130.9 (q, *J*C-F = 32.4 Hz), 127.3, 125.8 (q, *J*C-F = 3.6 Hz), 124.3 (q, *J*C-F = 273.3 Hz), 123.1, 121.0. **19F NMR** (376 MHz, Chloroform-*d*) δ -63.9. **HRMS**(ESI+) m/z calcd. for C12H8F3N+ [M+H]+: 224.0682, found: 224.0681.

**2-(4-(trimethylsilyl)phenyl)pyridine (3e)**

Prepared according to **GP1**. Colorless liquid (35.4 mg, 78%, 0.2 mmol scale); **1H NMR** (400 MHz, Chloroform-*d*) δ 8.70 (d, *J* = 4.7 Hz, 1H), 7.97 (d, *J* = 8.1 Hz, 2H), 7.77 – 7.73 (m, 2H), 7.64 (d, *J* = 8.2 Hz, 2H), 7.25 – 7.21 (m, 1H), 0.31 (s, 9H). **13C NMR** (101 MHz, Chloroform-*d*) δ 157.6, 149.8, 141.6, 139.8, 136.9, 133.9, 126.3, 122.3, 120.7, -1.0. **HRMS**(ESI+) m/z calcd. for C14H17NSi+ [M+H]+: 228.1203, found: 228.1201.

**2-(4-methoxyphenyl)pyridine (3f)**

Prepared according to **GP1**. Colorless liquid (32.3 mg, 87%, 0.2 mmol scale); **1H NMR** (400 MHz, Chloroform-*d*) δ 8.65 (d, *J* = 4.1 Hz, 1H), 7.95 (d, *J* = 8.9 Hz, 2H), 7.75 – 7.63 (m, 2H), 7.20 – 7.13 (m, 1H), 7.00 (d, *J* = 8.9 Hz, 2H), 3.87 (s, 3H). **13C NMR** (101 MHz, Chloroform-*d*) δ 159.1, 155.8, 148.2, 135.3, 130.7, 126.8, 120.1, 118.5, 112.8, 54.0. **HRMS**(ESI+) m/z calcd. for C12H11NO+ [M+H]+: 186.0913, found: 186.0916.

**2-(4-fluorophenyl)pyridine (3g)**

Prepared according to **GP1**. White solid (29.7 mg, 86%, 0.2 mmol scale); **1H NMR** (400 MHz, Chloroform-*d*) δ 8.68 (ddd, *J* = 4.8, 1.7, 1.0 Hz, 1H), 8.03 – 7.93 (m, 2H), 7.78 – 7.71 (m, 1H), 7.68 (dt, *J* = 8.0, 1.1 Hz, 1H), 7.22 (ddd, *J* = 7.3, 4.8, 1.2 Hz, 1H), 7.18 – 7.12 (m, 2H). **13C NMR** (101 MHz, Chloroform-*d*) δ 162.2 (d, *J*C-F = 248.3 Hz), 155.1, 148.4, 135.5, 134.2, 127.4 (d, *J*C-F = 8.3 Hz), 120.7, 118.9, 114.3 (*J*C-F, *J* = 21.6 Hz). **19F NMR** (376 MHz, Chloroform-*d*) δ -114.5.**HRMS**(ESI+) m/z calcd. for C11H8FN+ [M+H]+: 174.0714, found:174.0715.

**2-(4-chlorophenyl)pyridine (3h)**

Prepared according to **GP1**. White solid (31.1 mg, 82%, 0.2 mmol scale); **1H NMR** (400 MHz, Chloroform-*d*) δ 8.69 (d, *J* = 4.8 Hz, 1H), 7.96 – 7.91 (m, 2H), 7.75 (td, *J* = 7.6, 1.7 Hz, 1H), 7.70 (d, *J* = 8.0 Hz, 1H), 7.47 – 7.42 (m, 2H), 7.26 – 7.22 (m, 1H). **13C NMR** (101 MHz, Chloroform-*d*) δ 156.4, 149.9, 137.9, 137.0, 135.3, 129.1, 128.3, 122.5, 120.5. **HRMS**(ESI+) m/z calcd. for C11H8ClN+ [M+H]+: 190.0418, found: 190.0419.

**2-(4-bromophenyl)pyridine (3i)**

Prepared according to **GP1**. White solid (34.2 mg, 73%, 0.2 mmol scale); **1H NMR** (400 MHz, Chloroform-*d*) δ 8.68 (d, *J* = 3.8 Hz, 1H), 7.87 (d, *J* = 8.3 Hz, 2H), 7.71 (dd, *J* = 18.5, 6.0 Hz, 2H), 7.59 (d, *J* = 8.2 Hz, 2H), 7.24 (d, *J* = 5.0 Hz, 1H). **13C NMR** (101 MHz, Chloroform-*d*) δ 156.4, 149.9, 138.4, 137.0, 132.0, 128.6, 123.6, 122.6, 120.4. **HRMS**(ESI+) m/z calcd. for C11H8BrN+ [M+H]+: 233.9913, found: 233.9906.

**2-(3-methoxyphenyl)pyridine (3j)**

Prepared according to **GP1**. Pale-yellow liquid (31.9 mg, 86%, 0.2 mmol scale); **1H NMR** (400 MHz, Chloroform-*d*) δ 8.69 (dt, *J* = 4.8, 1.4 Hz, 1H), 7.80 – 7.67 (m, 2H), 7.62 – 7.57 (m, 1H), 7.54 (ddd, *J* = 7.7, 1.5, 0.9 Hz, 1H), 7.38 (t, *J* = 7.9 Hz, 1H), 7.23 (ddd, *J* = 6.7, 4.8, 2.0 Hz, 1H), 7.02 – 6.91 (m, 1H), 3.90 (s, 3H). **13C NMR** (101 MHz, Chloroform-*d*) δ 160.2, 157.4, 149.7, 141.0, 136.9, 129.9, 122.4, 120.8, 119.4, 115.2, 112.1, 55.5. **HRMS**(ESI+) m/z calcd. for C12H11NO+ [M+H]+: 186.0913, found: 186.0911.

**2-(3-chlorophenyl)pyridine (3k)**

Prepared according to **GP1**. Colorless liquid (30.8 mg, 86%, 0.2 mmol scale); **1H NMR** (400 MHz, Chloroform-*d*) δ 8.70 (d, *J* = 4.8 Hz, 1H), 8.01 (t, *J* = 1.9 Hz, 1H), 7.89 – 7.83 (m, 1H), 7.76 (td, *J* = 7.7, 1.8 Hz, 1H), 7.72 – 7.69 (m, 1H), 7.43 – 7.37 (m, 2H), 7.29 – 7.21 (m, 1H). **13C NMR** (101 MHz, Chloroform-*d*) δ 156.1, 149.9, 141.3, 137.0, 135.0, 130.1, 129.1, 127.2, 125.1, 122.8, 120.7. **HRMS**(ESI+) m/z calcd. for C11H8ClN+ [M+H]+: 190.0418, found: 190.0418.

**2-(2-methoxyphenyl)pyridine (3l)**

Prepared according to **GP1**. Pale-yellow liquid (22.3 mg, 60%, 0.2 mmol scale); **1H NMR** (400 MHz, Chloroform-*d*) δ 8.70 (d, *J* = 4.9 Hz, 1H), 7.81 (d, *J* = 8.0 Hz, 2H), 7.76 (dd, *J* = 7.6, 1.8 Hz, 1H), 7.70 (td, *J* = 7.7, 1.9 Hz, 1H), 7.40 – 7.35 (m, 1H), 7.20 (ddd, *J* = 7.4, 4.9, 1.2 Hz, 1H), 7.08 (td, *J* = 7.5, 1.0 Hz, 1H), 7.01 (d, *J* = 8.3 Hz, 1H), 3.86 (s, 3H). **13C NMR** (101 MHz, Chloroform-*d*) δ 157.1, 156.3, 149.6, 135.7, 131.3, 130.1, 129.3, 125.3, 121.8, 121.2, 111.5, 55.6. **HRMS**(ESI+) m/z calcd. for C12H11NO+ [M+H]+: 186.0913, found: 186.0911.

**2-(naphthalen-2-yl)pyridine (3m)**

Prepared according to **GP1**. White solid (32.1 mg, 78%, 0.2 mmol scale); **1H NMR** (400 MHz, Chloroform-*d*) δ 8.76 (d, *J* = 5.5 Hz, 1H), 8.49 (s, 1H), 8.14 (dd, *J* = 8.6, 1.8 Hz, 1H), 7.95 (d, *J* = 7.8 Hz, 2H), 7.88 (t, *J* = 5.0 Hz, 2H), 7.80 (t, *J* = 7.7 Hz, 1H), 7.51 (dd, *J* = 6.2, 3.2 Hz, 2H), 7.30 – 7.26 (m, 1H). **13C NMR** (101 MHz, Chloroform-*d*) δ 157.5, 149.9, 137.0, 136.8, 133.8, 133.6, 128.9, 128.6, 127.8, 126.7, 126.49, 126.45, 124.7, 122.3, 121.0. **HRMS**(ESI+) m/z calcd. for C15H11N+ [M+H]+: 206.0964, found: 206.0965.

**2-(benzo[*d*][1,3]dioxol-5-yl)pyridine (3n)**

Prepared according to **GP1**. Colorless oil (35.1 mg, 88%, 0.2 mmol scale); **1H NMR** (400 MHz, Chloroform-*d*) δ 8.64 (d, *J* = 3.8 Hz, 1H), 7.71 (td, *J* = 7.7, 1.8 Hz, 1H), 7.63 (d, *J* = 8.0 Hz, 1H), 7.55 – 7.47 (m, 2H), 7.18 (ddd, *J* = 7.4, 4.8, 1.2 Hz, 1H), 6.94 – 6.85 (m, 1H), 6.02 (s, 2H). **13C NMR** (101 MHz, Chloroform-*d*) δ 157.0, 149.6, 148.6, 148.4, 136.9, 134.0, 121.8, 121.0, 120.1, 108.6, 107.5, 101.4. **HRMS**(ESI+) m/z calcd. for C12H9NO2+ [M+H]+: 200.0706, found: 200.0706.

**2-(thiophen-2-yl)pyridine (3o)**

Prepared according to **GP1**. Pale-yellow liquid (22.8 mg, 71%, 0.2 mmol scale); **1H NMR** (400 MHz, Chloroform-*d*) δ 8.57 (d, *J* = 4.9 Hz, 1H), 7.71 – 7.62 (d, *J* = 8.1 Hz, 2H), 7.58 (d, *J* = 3.6 Hz, 1H), 7.39 (dd, *J* = 5.1, 1.1 Hz, 1H), 7.17 – 7.08 (m, 2H). **13C NMR** (101 MHz, Chloroform-*d*) δ 152.8, 149.7, 145.0, 136.8, 128.2, 127.7, 124.7, 122.0, 118.9. **HRMS**(ESI+) m/z calcd. for C9H7NS+ [M+H]+: 162.0372, found: 162.0372.

**2-(benzo[*b*]thiophen-2-yl)pyridine (3p)**

Prepared according to **GP1**. White solid (23.8 mg, 56%, 0.2 mmol scale); **1H NMR** (400 MHz, Chloroform-*d*) δ 8.64 (d, *J* = 4.9 Hz, 1H), 7.92 – 7.78 (m, 4H), 7.74 (td, *J* = 7.7, 1.7 Hz, 1H), 7.39 – 7.31 (m, 2H), 7.25 – 7.18 (m, 1H). **13C NMR** (101 MHz, Chloroform-*d*) δ 152.7, 149.8, 144.9, 140.8, 140.6, 136.8, 125.2, 124.6, 124.2, 122.74, 122.72, 121.2, 119.7. **HRMS**(ESI+) m/z calcd. for C13H9NS+ [M+H]+: 212.0258, found: 212.0250

**2-(dibenzo[*b*,*d*]furan-2-yl)pyridine (3q)**

Prepared according to **GP1**. White solid (36.2 mg, 74%, 0.2 mmol scale); **1H NMR** (400 MHz, Chloroform-*d*) δ 8.66 (d, *J* = 5.7 Hz, 1H), 8.32 (dd, *J* = 1.8, 0.6 Hz, 1H), 8.18 (dq, *J* = 8.6, 1.0 Hz, 1H), 7.99 (ddd, *J* = 7.7, 1.4, 0.7 Hz, 1H), 7.92 (dd, *J* = 8.2, 1.2 Hz, 1H), 7.82 (dd, *J* = 8.4, 1.8 Hz, 1H), 7.75 – 7.68 (m, 3H), 7.63 (dt, *J* = 8.3, 0.8 Hz, 1H), 7.57 (ddd, *J* = 8.3, 6.8, 1.2 Hz, 1H), 7.50 (ddd, *J* = 8.4, 7.3, 1.3 Hz, 1H), 7.37 (td, *J* = 7.5, 0.9 Hz, 1H). **13C NMR** (101 MHz, Chloroform-*d*) δ 160.8, 156.9, 156.5, 142.4, 137.2, 134.6, 130.2, 129.4, 127.8, 127.6, 127.5, 127.2, 127.1, 124.7, 124.3, 123.1, 122.5, 121.1, 120.1, 112.0, 111.6. **HRMS**(ESI+) m/z calcd. for C17H11NO+ [M+H]+: 246.0913, found: 246.0911.

**2-(phenylethynyl)pyridine (3r)**

Prepared according to **GP1**. Colorless oil (16.9 mg, 47%, 0.2 mmol scale); **1H NMR** (400 MHz, Chloroform-*d*) δ 8.62 (d, *J* = 5.4 Hz, 1H), 7.68 (td, *J* = 7.7, 1.8 Hz, 1H), 7.63 – 7.58 (m, 2H), 7.53 (d, *J* = 7.8 Hz, 1H), 7.39 – 7.32 (m, 3H), 7.24 (ddd, *J* = 7.6, 4.9, 1.2 Hz, 1H). **13C NMR** (101 MHz, Chloroform-*d*) δ 150.2, 143.6, 136.3, 132.2, 129.1, 128.5, 127.3, 122.9, 122.4, 89.4, 88.7. **HRMS**(ESI+) m/z calcd. for C13H9N+ [M+H]+: 180.0808, found: 180.0809.

**2-benzylpyridine (3s)**

Prepared according to **GP1**. Pale yellow liquid (14.1 mg, 42%, 0.2 mmol scale); **1H NMR** (400 MHz, Chloroform-*d*) δ 8.55 (d, *J* = 4.1 Hz, 1H), 7.58 (td, *J* = 7.7, 1.8 Hz, 1H), 7.34 – 7.27(m, 4H), 7.25 – 7.19 (m, 1H), 7.14 – 7.09 (m, 2H), 4.16 (s, 2H). **13C NMR** (101 MHz, Chloroform-*d*) δ 161.1, 149.5, 139.6, 136.7, 129.3, 128.7, 126.5, 123.3, 121.4, 44.9. **HRMS**(ESI+) m/z calcd. for C12H11N+ [M+H]+: 170.0964, found: 170.0970

**2-(2-(1,3-dioxan-2-yl)ethyl)pyridine (3t)**

Prepared according to **GP1**. Colorless liquid (23.0 mg, 60%, 0.2 mmol scale); **1H NMR** (400 MHz, Chloroform-*d*) δ 8.52 (d, *J* = 4.7 Hz, 1H), 7.58 (td, *J* = 7.7, 1.8 Hz, 1H), 7.15 (d, *J* = 7.8 Hz, 1H), 7.10 (dd, *J* = 7.4, 5.0 Hz, 1H), 4.55 (t, *J* = 5.2 Hz, 1H), 4.11 (dd, *J* = 11.2, 4.4 Hz, 2H), 3.75 (td, *J* = 12.4, 2.5 Hz, 2H), 2.91 (t, *J* = 7.8 Hz, 2H), 2.15 – 2.01 (m, 3H), 1.39 – 1.27 (m, 1H). **13C NMR** (101 MHz, Chloroform-*d*) δ 161.6, 149.3, 136.5, 123.0, 121.2, 101.6, 67.0, 34.9, 32.6, 26.0. **HRMS**(ESI+) m/z calcd. for C11H15NO2+ [M+H]+: 194.1176, found: 194.1174.

**2-cyclohexylpyridine (3u)**

Prepared according to **GP1**. Colorless liquid (13.3 mg, 41%, 0.2 mmol scale); **1H NMR** (400 MHz, Chloroform-*d*) δ 8.51 (d, *J* = 4.1 Hz, 1H), 7.58 (td, *J* = 7.7, 1.8 Hz, 1H), 7.13 (d, *J* = 7.9 Hz, 1H), 7.09 – 7.05 (m, 1H), 2.68 (tt, *J* = 11.9, 3.4 Hz, 1H), 1.98 – 1.90 (m, 2H), 1.89 – 1.80 (m, 2H), 1.77 – 1.70 (m, 1H), 1.58–1.34 (m, 4H), 1.33 – 1.20 (m, 1H).**13C NMR** (101 MHz, Chloroform-*d*) δ 166.6, 149.2, 136.5, 121.1, 46.7, 33.1, 26.7, 26.2.**HRMS**(ESI+) m/z calcd. for C11H15N+ [M+H]+: 162.1277, found: 162.1272.

**2-butylpyridine (3v)**

Prepared according to **GP1**. Colorless liquid (11.4 mg, 42%, 0.2 mmol scale); **1H NMR** (400 MHz, Chloroform-*d*) δ 8.52 (d, *J* = 4.9 Hz, 1H), 7.58 (td, *J* = 7.7, 1.8 Hz, 1H), 7.14 (d, *J* = 7.8 Hz, 1H), 7.09 (dd, *J* = 7.4, 5.0 Hz, 1H), 2.78 (t, 2H), 1.75 – 1.66 (m, 2H), 1.38 (dt, *J* = 14.7, 7.4 Hz, 2H), 0.94 (t, *J* = 7.4 Hz, 3H). **13C NMR** (101 MHz, Chloroform-*d*) δ 162.7, 149.3, 136.4, 122.8, 121.0, 38.3, 32.2, 22.6, 14.1.**HRMS**(ESI+) m/z calcd. for C9H13N+ [M+H]+: 136.1121, found: 136.1121.

**2-octylpyridine (3w)**

Prepared according to **GP1**. Colorless liquid (20.2 mg, 53%, 0.2 mmol scale); **1H NMR** (400 MHz, Chloroform-*d*) δ 8.52 (ddd, *J* = 4.9, 1.9, 0.9 Hz, 1H), 7.58 (td, *J* = 7.6, 1.9 Hz, 1H), 7.14 (dt, *J* = 7.8, 1.1 Hz, 1H), 7.09 (ddd, *J* = 7.5, 4.9, 1.2 Hz, 1H), 2.78 (t, *J* = 7.7 Hz, 2H), 1.77 – 1.68 (m, 2H), 1.39 – 1.22 (m, 10H), 0.87 (t, *J* = 6.8 Hz, 3H). **13C NMR** (101 MHz, Chloroform-*d*) δ 162.7, 149.3, 136.4, 122.9, 121.0, 38.6, 32.0, 30.1, 29.60, 29.56, 29.4, 22.8, 14.3. **HRMS**(ESI+) m/z calcd. for C13H21N+ [M+H]+: 192.1747, found: 192.1748.

**2-phenethylpyridine (3x)**

Prepared according to **GP1**. Colorless liquid (21.4 mg, 58%, 0.2 mmol scale);**1H NMR** (400 MHz, Chloroform-*d*) δ 8.57 (ddd, *J* = 5.0, 1.9, 1.0 Hz, 1H), 7.56 (td, *J* = 7.6, 1.8 Hz, 1H), 7.33 – 7.23 (m, 2H), 7.30 – 7.16 (m, 3H), 7.14 – 7.05 (m, 2H), 3.20 – 2.97 (m, 4H). **13C NMR** (101 MHz, Chloroform-*d*) δ 161.4, 149.5, 141.7, 136.4, 128.6, 128.5, 126.1, 123.1, 121.3, 40.4, 36.2. **HRMS**(ESI+) m/z calcd. for C13H13N+ [M+H]+: 184.1121, found: 184.1117.

**2,4-diphenylpyridine (3y)**

Prepared according to **GP1**. White solid (43.1 mg, 93%, 0.2 mmol scale); **1H NMR** (400 MHz, Chloroform-*d*) δ 8.75 (d, *J* = 5.1 Hz, 1H), 8.06 (d, *J* = 7.4 Hz, 2H), 7.94 (s, 1H), 7.73 – 7.67 (m, 2H), 7.55 – 7.67 (m, 5H), 7.48 – 7.44 (m, 2H). **13C NMR** (101 MHz, Chloroform-*d*) δ 156.8, 148.8, 148.1, 138.2, 137.2, 127.84, 127.77, 127.5, 125.80, 125.78, 119.0, 117.6. **HRMS**(ESI+) m/z calcd. for C17H13N+ [M+H]+: 232.1122, found: 232.1122.

**methyl 2-phenylisonicotinate (3z)**

Prepared according to **GP1**. Colorless liquid (36.5 mg, 86%, 0.2 mmol scale); **1H NMR** (400 MHz, Chloroform-*d*) δ 8.84 (d, *J* = 5.0 Hz, 1H), 8.33 – 8.28 (m, 1H), 8.06 (dd, *J* = 7.2, 1.7 Hz, 2H), 7.77 (ddd, *J* = 5.0, 1.5, 0.8 Hz, 1H), 7.55 – 7.42 (m, 3H), 3.99 (s, 3H). **13C NMR** (101 MHz, Chloroform-*d*) δ 166.0, 158.6, 150.6, 138.6, 138.3, 129.6, 129.0, 127.2, 121.3, 119.9, 115.5, 52.9. **HRMS**(ESI+) m/z calcd. for C13H11NO2+ [M+H]+: 214.0863, found: 214.0864.

**4-chloro-2-phenylpyridine (3aa)**

Prepared according to **GP1**. White solid (30.1 mg, 79%, 0.2 mmol scale); **1H NMR** (400 MHz, Chloroform-*d*) δ 8.56 (d, *J* = 5.3 Hz, 1H), 7.97 (d, *J* = 8.2 Hz, 2H), 7.71 (s, 1H), 7.51 – 7.39 (m, 3H), 7.21 (dd, *J* = 5.3, 1.8 Hz, 1H). **13C NMR** (101 MHz, Chloroform-*d*) δ 159.2, 150.6, 144.9, 138.3, 129.7, 129.0, 127.1, 122.4, 121.0. **HRMS**(ESI+) m/z calcd. for C11H8ClN+ [M+H]+: 190.0418, found: 190.0419.

**4-bromo-2-phenylpyridine (3ab)**

Prepared according to **GP1**. Colorless oil (37.4 mg, 80%, 0.2 mmol scale); **1H NMR** (400 MHz, Chloroform-*d*) δ 8.50 (d, *J* = 5.2 Hz, 1H), 7.97 (d, *J* = 7.2 Hz, 2H), 7.90 (s, 1H), 7.52 – 7.42 (m, 3H), 7.39 (dt, *J* = 5.2, 1.2 Hz, 1H). **13C NMR** (101 MHz, Chloroform-*d*) δ 159.03, 150.48, 138.18, 133.59, 129.73, 128.99, 127.13, 125.37, 124.03. **HRMS**(ESI+) m/z calcd. for C11H8BrN+ [M+H]+: 233.9913, found: 233.9909.

**4-methoxy-2-phenylpyridine (3ac)**

Prepared according to **GP1**. Pale-yellow liquid (30.5 mg, 82%, 0.2 mmol scale); **1H NMR** (400 MHz, Chloroform-*d*) δ 8.52 (d, *J* = 5.7 Hz, 1H), 7.96 (dd, *J* = 8.3, 1.3 Hz, 3H), 7.50 – 7.39 (m, 3H), 7.23 (d, *J* = 2.4 Hz, 1H), 6.78 (dd, *J* = 5.7, 2.4 Hz, 1H), 3.91 (s, 3H). **13C NMR** (101 MHz, Chloroform-*d*) δ 166.5, 159.4, 151.0, 139.6, 129.2, 128.8, 127.1, 108.3, 107.0, 55.3. **HRMS**(ESI+) m/z calcd. for C12H11NO+ [M+H]+: 186.0913, found: 186.0912.

**4-phenoxy-2-phenylpyridine (3ad)**

Prepared according to **GP1**. Pale-yellow liquid (43.9 mg, 89%, 0.2 mmol scale); **1H NMR** (400 MHz, Chloroform-*d*) δ 8.54 (d, *J* = 5.6, 0.5 Hz, 1H), 7.94 – 7.89 (m, 2H), 7.48 – 7.41 (m, 5H), 7.30 – 7.24 (m, 2H), 7.16 – 7.12 (m, 2H), 6.78 (dd, *J* = 5.6, 2.4 Hz, 1H). **13C NMR** (101 MHz, Chloroform-*d*) δ 165.7, 159.8, 154.4, 151.3, 139.2, 130.4, 129.3, 128.9, 127.1, 125.5, 120.9, 110.8, 109.3. **HRMS**(ESI+) m/z calcd. for C17H13NO+ [M+H]+: 248.1070, found: 248.1071.

**4-methyl-2-phenylpyridine (3ae)**

Prepared according to **GP1**. White liquid (29.8 mg, 88%, 0.2 mmol scale); **1H NMR** (400 MHz, Chloroform-*d*) δ 8.55 (d, *J* = 5.0 Hz, 1H), 7.97 (dd, *J* = 8.3, 1.3 Hz, 2H), 7.55 (s, 1H), 7.50 – 7.44 (m, 2H), 7.43 – 7.38 (m, 1H), 7.06 (d, *J* = 5.0 Hz, 1H), 2.42 (s, 3H). **13C NMR** (101 MHz, Chloroform-*d*) δ 156.1, 148.1, 146.6, 138.2, 127.6, 127.4, 125.7, 121.9, 120.3, 20.0. **HRMS**(ESI+) m/z calcd. for C12H11N+ [M+H]+: 170.0964, found: 170.0966.

**3-methyl-2-phenylpyridine (3af)**

Prepared according to **GP1**. White liquid (12.1 mg, 36%, 0.2 mmol scale); **1H NMR** (400 MHz, Chloroform-*d*) δ 8.53 (d, *J* = 4.3 Hz, 1H), 7.59 (d, *J* = 7.6 Hz, 1H), 7.53 (d, *J* = 8.6 Hz, 2H), 7.45 (t, *J* = 7.3 Hz, 2H), 7.40 (d, *J* = 7.2 Hz, 1H), 7.18 (dd, *J* = 7.7, 4.8 Hz, 1H), 2.36 (s, 3H). **13C NMR** (101 MHz, Chloroform-*d*) δ 158.8, 147.1, 140.7, 138.7, 131.0, 129.1, 128.3, 128.1, 122.2, 20.2. **HRMS**(ESI+) m/z calcd. for C12H11N+ [M+H]+: 170.0964, found: 170.0961.

**5-methyl-2-phenylpyridine (3af’)**

Prepared according to **GP1**. White liquid (11.2 mg, 33%, 0.2 mmol scale); **1H NMR** (400 MHz, Chloroform-*d*) δ 8.53 (s, 1H), 7.96 (dd, *J* = 8.3, 1.2 Hz, 2H), 7.63 (d, *J* = 8.0 Hz, 1H), 7.56 (dd, *J* = 8.3, 2.0 Hz, 1H), 7.48 – 7.43 (m, 2H), 7.42 – 7.36 (m, 1H), 2.37 (s, 3H). **13C NMR** (101 MHz, Chloroform-*d*) δ 154.9, 150.2, 139.5, 137.5, 131.8, 128.9, 128.8, 126.9, 120.2, 18.3. **HRMS**(ESI+) m/z calcd. for C12H11N+ [M+H]+: 170.0964, found: 170.0968.

**2,6-diphenylpyridine (3ag)**

Prepared according to **GP1**. White solid (26.5 mg, 57%, 0.2 mmol scale); **1H NMR** (400 MHz, Chloroform-*d*) δ 8.17 (dd, *J* = 8.3, 1.3 Hz, 4H), 7.82 (dd, *J* = 8.4, 7.2 Hz, 1H), 7.72 – 7.68 (m, 2H), 7.54 – 7.48 (m, 4H), 7.47 – 7.41 (m, 2H). **13C NMR** (101 MHz, Chloroform-*d*) δ 157.0, 139.6, 137.6, 129.1, 128.8, 127.1, 118.8. **HRMS**(ESI+) m/z calcd. for C17H13N+ [M+H]+: 232.1121, found: 232.1122.

**2-methyl-6-phenylpyridine (3ah)**

Prepared according to **GP1**. White liquid (20.7 mg, 61%, 0.2 mmol scale); **1H NMR** (400 MHz, Chloroform-*d*) δ 7.98 (d, *J* = 7.4 Hz, 2H), 7.64 (t, *J* = 7.7 Hz, 1H), 7.55 – 7.43 (m, 3H), 7.40 (t, *J* = 7.9 Hz, 1H), 7.10 (d, *J* = 7.6 Hz, 1H), 2.63 (s, 3H). **13C NMR** (101 MHz, Chloroform-*d*) δ 158.5, 157.1, 139.9, 137.0, 128.8, 127.2, 121.7, 117.8, 24.9. **HRMS**(ESI+) m/z calcd. for C12H11N+ [M+H]+: 170.0964, found: 170.0968.

**2-methoxy-6-phenylpyridine (3ai)**

Prepared according to **GP1**. Pale-yellow liquid (22.1 mg, 60%, 0.2 mmol scale); **1H NMR** (400 MHz, Chloroform-*d*) δ 8.08 (dd, *J* = 8.3, 1.3 Hz, 2H), 7.68 – 7.58 (m, 1H), 7.51 – 7.45 (m, 2H), 7.41 (t, *J* = 6.6 Hz, 1H), 7.36 (dd, *J* = 7.4, 0.7 Hz, 1H), 6.71 (dd, *J* = 8.2, 0.7 Hz, 1H), 4.07 (s, 3H). **13C NMR** (101 MHz, Chloroform-*d*) δ 163.9, 154.8, 139.3, 139.2, 129.0, 128.7, 126.8, 112.9, 109.4, 53.3. **HRMS**(ESI+) m/z calcd. for C12H11NO+ [M+H]+: 186.0913, found: 186.0911.

**2-phenyl-6-(thiophen-2-yl)pyridine (3aj)**

Prepared according to **GP1**. Yellow solid (22.6 mg, 48%, 0.2 mmol scale); **1H NMR** (400 MHz, Chloroform-*d*) δ 8.19 – 8.11 (m, 2H), 7.74 (t, *J* = 7.8 Hz, 1H), 7.66 (dd, *J* = 3.7, 1.1 Hz, 1H), 7.62 (d, *J* = 8.5 Hz, 1H), 7.59 (d, *J* = 7.8 Hz, 1H), 7.52 (t, *J* = 7.6 Hz, 2H), 7.47 – 7.41 (m, 2H), 7.14 (dd, *J* = 5.0, 3.7 Hz, 1H). **13C NMR** (101 MHz, Chloroform-*d*) δ 156.8, 152.4, 145.6, 139.1, 137.5, 129.2, 128.8, 128.1, 127.7, 127.0, 124.6, 118.4, 117.1. **HRMS**(ESI+) m/z calcd. for C15H11NS+ [M+H]+: 238.0685, found: 238.0682.

**1-phenylisoquinoline (3ak)**

Prepared according to **GP2**. White solid (23.9 mg, 58%, 0.2 mmol scale);**1H NMR** (400 MHz, Chloroform-*d*) δ 8.62 (d, *J* = 5.7 Hz, 1H), 8.11 (d, *J* = 5.2 Hz, 1H), 7.89 (d, *J* = 8.2 Hz, 1H), 7.74 – 7.64 (m, 4H), 7.58 – 7.46 (m, 4H). **13C NMR** (101 MHz, Chloroform-*d*) δ 160.9, 142.4, 139.7, 137.0, 130.2, 130.1, 128.7, 128.5, 127.7, 127.3, 127.1, 126.8, 120.1. **HRMS**(ESI+) m/z calcd. for C15H11N+ [M+H]+: 206.0964, found: 206.0965.

**8-methyl-2-phenylquinoline (3al)**

Prepared according to **GP2**. Pale-yellow solid (40.2 mg, 92%, 0.2 mmol scale); **1H NMR** (400 MHz, Chloroform-*d*) δ 8.27 (dd, *J* = 8.4, 1.3 Hz, 2H), 8.19 (d, *J* = 8.6 Hz, 1H), 7.91 (d, *J* = 8.6 Hz, 1H), 7.69– 7.65 (d, *J* = 8.2 Hz, 1H), 7.60 – 7.51 (m, 3H), 7.49 – 7.39 (m, 2H), 2.91 (s, 3H). **13C NMR** (101 MHz, Chloroform-*d*) δ 155.7, 147.3, 140.0, 137.8, 137.1, 129.8, 129.4, 128.9, 127.6, 127.2, 126.2, 125.5, 118.4, 18.1. **HRMS**(ESI+) m/z calcd. for C16H13N+ [M+H]+: 220.1121, found: 220.1127.

**8-methoxy-2-phenylquinoline (3am)**

Prepared according to **GP2**. Pale-yellow oil (41.6 mg, 88%, 0.2 mmol scale); **1H NMR** (400 MHz, Chloroform-*d*) δ 8.19 (d, *J* = 8.3 Hz, 3H), 7.90 (d, *J* = 8.6 Hz, 1H), 7.51 (t, *J* = 7.4 Hz, 2H), 7.47 – 7.38 (m, 3H), 7.07 (dd, *J* = 7.4, 1.3 Hz, 1H), 4.10 (s, 3H). **13C NMR** (101 MHz, Chloroform-*d*) δ 156.4, 155.7, 140.2, 139.8, 136.9, 129.3, 128.9, 128.4, 127.8, 126.6, 119.6, 119.5, 108.2, 56.2. **HRMS**(ESI+) m/z calcd. for C16H13NO+ [M+Na]+: 258.0889, found: 258.0893.

**7-chloro-8-methyl-2-phenylquinoline (3an)**

Prepared according to **GP2**. White solid (35.5 mg, 70%, 0.2 mmol scale); **1H NMR** (400 MHz, Chloroform-*d*) δ 8.29 – 8.23 (m, 2H), 8.15 (d, *J* = 8.6 Hz, 1H), 7.89 (d, *J* = 8.6 Hz, 1H), 7.62 – 7.44 (m, 5H), 2.98 (s, 3H). **13C NMR** (101 MHz, Chloroform-*d*) δ 156.4, 147.6, 139.5, 137.1, 135.4, 135.1, 129.7, 129.0, 127.7, 127.6, 125.8, 125.7, 118.3, 14.6. **HRMS**(ESI+) m/z calcd. for C16H12ClN+ [M+H]+: 254.0731, found: 254.0733.

**4-bromo-8-methoxy-2-phenylquinoline (3ao)**

Prepared according to **GP2**. White solid (32.1 mg, 51%, 0.2 mmol scale); **1H NMR** (400 MHz, Chloroform-*d*) δ 8.21 (s, 1H), 8.16 (dd, *J* = 7.5, 2.0 Hz, 2H), 7.77 (d, *J* = 9.2 Hz, 1H), 7.57 – 7.43 (m, 4H), 7.12 (d, *J* = 7.6 Hz, 1H), 4.11 (s, 3H). **13C NMR** (101 MHz, Chloroform-*d*) δ 156.1, 155.8, 140.8, 138.7, 134.7, 129.8, 129.0, 127.9, 127.8, 127.7, 123.7, 118.5, 109.0, 56.5. **HRMS**(ESI+) m/z calcd. for C16H12BrNO+ [M+Na]+: 335.9994, found: 335.9997.

**2-phenethyl-4-phenylpyridine (3aq)**

Prepared according to **GP1**. Colorless oil (32.8 mg, 63%, 0.2 mmol scale); **1H NMR** (400 MHz, Chloroform-*d*) δ 8.56 (d, *J* = 5.2 Hz, 1H), 7.55 – 7.49 (m, 2H), 7.45 – 7.33 (m, 3H), 7.29 (dd, *J* = 5.3, 1.8 Hz, 1H), 7.25 – 7.12 (m, 6H), 3.25 – 2.92 (m, 4H). **13C NMR** (101 MHz, Chloroform-*d*) δ 161.8, 149.8, 148.9, 141.7, 138.6, 129.2, 129.1, 128.7, 128.5, 127.2, 126.1, 121.2, 119.5, 40.5, 36.3. **HRMS**(ESI+) m/z calcd. for C19H17N+ [M+H]+: 260.1434, found: 260.1434.

**2-butyl-4-phenylpyridine (3ar)**

Prepared according to **GP1**. Colorless oil (33.0 mg, 78%, 0.2 mmol scale); **1H NMR** (400 MHz, Chloroform-*d*) δ 8.57 (d, *J* = 5.1 Hz, 1H), 7.61 – 7.65 (m, 2H), 7.51 – 7.39 (m, 3H), 7.36 (s, 1H), 7.32 (dd, *J* = 5.2, 1.7 Hz, 1H), 2.85 (t, *J* = 7.7 Hz, 2H), 1.83 – 1.71 (m, 2H), 1.37 – 1.47 (m, 2H), 0.96 (t, *J* = 7.4 Hz, 3H).**13C NMR** (101 MHz, Chloroform-*d*) δ 163.1, 149.7, 148.8, 138.7, 129.2, 129.0, 127.2, 120.8, 119.2, 38.4, 32.3, 22.7, 14.1. **HRMS**(ESI+) m/z calcd. for C15H17N+ [M+H]+: 212.1434, found: 212.1430.

**2-benzyl-4-phenylpyridine (3as)**

Prepared according to **GP1**. Colorless oil (34.4 mg, 70%, 0.2 mmol scale); **1H NMR** (400 MHz, Chloroform-*d*) δ 8.60 (d, *J* = 6.0 Hz, 1H), 7.58 (dd, *J* = 8.1, 1.5 Hz, 2H), 7.49 – 7.40 (m, 3H), 7.37 – 7.33 (m, 2H), 7.32 (d, *J* = 4.4 Hz, 4H), 7.26 – 7.20 (m, 1H), 4.23 (s, 2H). **13C NMR** (101 MHz, Chloroform-*d*) δ 161.6, 149.9, 149.2, 139.6, 138.5, 129.24, 129.16, 129.1, 128.8, 127.2, 126.6, 121.2, 119.6, 44.9. **HRMS**(ESI+) m/z calcd. for C18H15N+ [M+H]+: 246.1277, found: 246.1276.

**(*E*)-4-phenyl-2-(prop-1-en-1-yl)pyridine (3at)**

Prepared according to **GP1**. Colorless oil (20.1 mg, 51%, 0.2 mmol scale); **1H NMR** (400 MHz, Chloroform-*d*) δ 8.65 (d, *J* = 5.2 Hz, 1H), 7.64 (dd, *J* = 7.3, 1.6 Hz, 2H), 7.55 – 7.39 (m, 4H), 7.33 (dd, *J* = 5.2, 1.7 Hz, 1H), 6.56 (dd, *J* = 11.8, 1.8 Hz, 1H), 6.06 (dq, *J* = 11.8, 7.3 Hz, 1H), 2.14 (dd, *J* = 7.3, 1.8 Hz, 3H). **13C NMR** (101 MHz, Chloroform-*d*) δ 157.4, 149.8, 148.6, 138.7, 131.7, 129.7, 129.2, 129.1, 127.2, 122.1, 119.4, 15.3. **HRMS**(ESI+) m/z calcd. for C14H13N+ [M+H]+: 196.1121, found: 196.1119.

**4-phenyl-2-vinylpyridine (3au)**

Prepared according to **GP1**. Colorless oil (27.1 mg, 75%, 0.2 mmol scale); **1H NMR** (400 MHz, Chloroform-*d*) δ 8.62 (d, *J* = 5.2 Hz, 1H), 7.65 (d, *J* = 6.8 Hz, 2H), 7.57 – 7.42 (m, 4H), 7.38 (dd, *J* = 5.1, 1.6 Hz, 1H), 6.89 (dd, *J* = 17.5, 10.8 Hz, 1H), 6.28 (d, *J* = 17.5 Hz, 1H), 5.53 (d, *J* = 10.8 Hz, 1H). **13C NMR** (101 MHz, Chloroform-*d*) δ 156.3, 150.0, 149.3, 138.4, 137.0, 129.3, 129.2, 127.2, 120.7, 119.6, 118.7. **HRMS**(ESI+) m/z calcd. for C13H11N+ [M+H]+: 182.0964, found: 182.0963.

**4-phenyl-2-(prop-1-yn-1-yl)pyridine (3av)**

Prepared according to **GP1**. Colorless oil (16.3 mg, 42%, 0.2 mmol scale); **1H NMR** (400 MHz, Chloroform-*d*) δ 8.57 (dd, *J* = 5.2, 0.9 Hz, 1H), 7.64 – 7.59 (m, 3H), 7.51 – 7.44 (m, 3H), 7.41 (dd, *J* = 5.2, 1.8 Hz, 1H), 2.11 (s, 3H). **13C NMR** (101 MHz, Chloroform-*d*) δ 150.2, 148.9, 144.3, 137.7, 129.4, 129.3, 127.1, 124.8, 120.5, 87.2, 79.7, 4.5. **HRMS**(ESI+) m/z calcd. for C14H11N+ [M+H]+: 194.0964, found: 194.0960.

**methyl 2-(4-vinylphenyl)isonicotinate (3aw)**

Prepared according to **GP1**. White solid (35.7 mg, 75%, 0.2 mmol scale); **1H NMR** (400 MHz, Chloroform-*d*) δ 8.82 (d, *J* = 5.0 Hz, 1H), 8.30 (s, 1H), 8.04 (d, *J* = 8.3 Hz, 2H), 7.76 (dd, *J* = 5.0, 1.2 Hz, 1H), 7.53 (d, *J* = 8.3 Hz, 2H), 6.77 (dd, *J* = 17.6, 10.9 Hz, 1H), 5.85 (d, *J* = 17.6 Hz, 1H), 5.33 (d, *J* = 10.9 Hz, 1H), 3.99 (s, 3H). **13C NMR** (101 MHz, Chloroform-*d*) δ 165.9, 158.1, 150.6, 138.8, 138.3, 137.9, 136.4, 127.3, 126.9, 121.2, 119.7, 115.0, 52.9. **HRMS**(ESI+) m/z calcd. for C15H13NO2+ [M+H]+: 240.1019, found: 240.1020.

**2-(4-chlorophenyl)-4-methoxypyridine (3ax)**

Prepared according to **GP1**. Yellow oil (36.1 mg, 82%, 0.2 mmol scale); **1H NMR** (400 MHz, Chloroform-*d*) δ 8.50 (d, *J* = 5.7 Hz, 1H), 7.90 (d, *J* = 8.7 Hz, 2H), 7.43 (d, *J* = 8.7 Hz, 2H), 7.19 (d, *J* = 2.3 Hz, 1H), 6.78 (dd, *J* = 5.7, 2.4 Hz, 1H), 3.91 (s, 3H). **13C NMR** (101 MHz, Chloroform-*d*) δ 166.6, 158.1, 151.1, 137.9, 135.3, 129.0, 128.4, 108.4, 107.0, 55.4. **HRMS**(ESI+) m/z calcd. for C12H10ClNO+ [M+H]+: 220.0524, found: 220.0524.

**2-(4-chlorophenyl)-4-phenoxypyridine (3ay)**

Prepared according to **GP1**. Yellow oil (45.7 mg, 81%, 0.2 mmol scale); **1H NMR** (400 MHz, Chloroform-*d*) δ 8.52 (d, *J* = 5.6 Hz, 1H), 7.89 – 7.83 (m, 2H), 7.48 – 7.38 (m, 4H), 7.30 – 7.25 (m, 2H), 7.16 – 7.11 (m, 2H), 6.78 (dd, *J* = 5.6, 2.3 Hz, 1H).**13C NMR** (101 MHz, Chloroform-*d*) δ 165.8, 158.5, 154.3, 151.4, 137.6, 135.5, 130.4, 129.0, 128.3, 125.6, 120.9, 111.0, 109.1. **HRMS**(ESI+) m/z calcd. for C17H12ClNO+ [M+H]+: 282.0680, found: 282.0678.

**4-bromo-2-(4-chlorophenyl)pyridine (3az)**

Prepared according to **GP1**. White solid (45.0 mg, 84%, 0.2 mmol scale); **1H NMR** (400 MHz, Chloroform-*d*) δ 8.49 (d, *J* = 5.3 Hz, 1H), 7.92 (d, *J* = 8.6 Hz, 2H), 7.87 (d, *J* = 1.7 Hz, 1H), 7.45 (d, *J* = 8.6 Hz, 2H), 7.41 (dd, *J* = 5.3, 1.8 Hz, 1H). **13C NMR** (101 MHz, Chloroform-*d*) δ 157.8, 150.6, 136.6, 136.0, 133.8, 129.2, 128.4, 125.7, 123.8. **HRMS**(ESI+) m/z calcd. for C11H7BrClN+ [M+H]+: 267.9523, found: 267.9514.

**4-bromo-2-(4-fluorophenyl)pyridine (3aaa)**

Prepared according to **GP1**. White solid (38.4 mg, 76%, 0.2 mmol scale); **1H NMR** (400 MHz, Chloroform-*d*) δ 8.47 (d, *J* = 5.3 Hz, 1H), 7.95 (dd, *J* = 8.8, 5.4 Hz, 2H), 7.84 (s, 1H), 7.38 (dd, *J* = 5.3, 1.7 Hz, 1H), 7.15 (t, *J* = 8.7 Hz, 2H). **13C NMR** (101 MHz, Chloroform-*d*) δ 164.0 (d, *J*C-F = 249.6 Hz), 157.9, 150.5, 134.3, 133.7, 129.0 (d, *J*C-F = 8.4 Hz), 125.3, 123.7, 116.0 (d, *J*C-F = 21.7 Hz). **19F NMR** (376 MHz, Chloroform-*d*) δ -113.2. **HRMS**(ESI+) m/z calcd. for C11H7BrFN+ [M+H]+: 251.9819, found: 251.9820.

**4-bromo-2-(4-fluorophenyl)pyridine (3aab)**

Prepared according to **GP1**. White solid (42.1 mg, 80%, 0.2 mmol scale); **1H NMR** (400 MHz, Chloroform-*d*) δ 8.45 (d, *J* = 5.2 Hz, 1H), 7.97 – 7.90 (m, 2H), 7.83 (d, *J* = 1.7 Hz, 1H), 7.33 (dd, *J* = 5.2, 1.7 Hz, 1H), 7.03 – 6.95 (m, 2H), 3.87 (s, 3H).**13C NMR** (101 MHz, Chloroform-*d*) δ 161.1, 158.7, 150.4, 133.5, 130.7, 128.5, 124.7, 123.2, 114.4, 55.5. **HRMS**(ESI+) m/z calcd. for C12H10BrNO+ [M+H]+: 264.0019, found: 264.0014.

**1-(4-fluorophenyl)isoquinoline (3aac)**

Prepared according to **GP2**. White solid (25.9 mg, 58%, 0.2 mmol scale);**1H NMR** (400 MHz, Chloroform-*d*) δ 8.63 (d, *J* = 5.7 Hz, 1H), 8.10 (d, *J* = 8.5 Hz, 1H), 7.92 (d, *J* = 8.2 Hz, 1H), 7.77 – 7.67 (m, 4H), 7.59 (t, *J* = 7.7 Hz, 1H), 7.31 – 7.19 (m, 2H). **13C NMR** (101 MHz, Chloroform-*d*) δ 163.2 (d, *J*C-F = 248.1 Hz), 159.8, 142.3, 137.0, 135.7, 131.9, 130.3, 127.5 (d, *J*C-F = 7.2 Hz), 127.2, 126.8, 120.2, 115.5 (d, *J*C-F = 21.6 Hz).**19F NMR** (376 MHz, Chloroform-*d*) δ -114.5. **HRMS**(ESI+) m/z calcd. for C15H10FN+ [M+H]+: 224.0870, found: 224.0868.

**1-(4-(trimethylsilyl)phenyl)isoquinoline (3aad)**

Prepared according to **GP2**. White solid (33.4 mg, 60%, 0.2 mmol scale);**1H NMR** (400 MHz, Chloroform-*d*) δ 8.61 (d, *J* = 5.8 Hz, 1H), 8.14 (dq, *J* = 8.6, 1.0 Hz, 1H), 7.89 (dd, *J* = 8.2, 1.1 Hz, 1H), 7.73 – 7.67 (m, 5H), 7.65 (dd, *J* = 5.8, 1.1 Hz, 1H), 7.56 – 7.51 (m, 1H), 0.34 (s, 9H). **13C NMR** (101 MHz, Chloroform-*d*) δ 160.9, 142.4, 141.1, 140.0, 137.0, 133.5, 130.1, 129.3, 127.8, 127.3, 127.1, 126.8, 120.0, -1.0. **HRMS**(ESI+) m/z calcd. for C18H19NSi+ [M+H]+: 278.1360, found: 278.1362.

**2-phenethyl-4-phenyl-4*H*-pyrrolo[3,2,1-*ij*]quinoline (5a)**

Prepared according to**GP3**. White solid (54.1 mg, 81%, 0.2 mmol scale); **1H NMR** (400 MHz, Chloroform-*d*) δ 7.38 (d, *J* = 8.0 Hz, 1H), 7.29 – 7.19 (m, 5H), 7.18 – 7.12 (m, 1H), 6.97 (dd, *J* = 15.2, 8.0 Hz, 5H), 6.81 (d, *J* = 7.0 Hz, 1H), 6.50 (dd, *J* = 9.8, 1.8 Hz, 1H), 6.27 (s, 1H), 6.00 (d, *J* = 4.1 Hz, 1H), 5.73 (dd, *J* = 9.8, 4.2 Hz, 1H), 2.85 – 2.76 (m, 1H), 2.72 – 2.61 (m, 2H), 2.61 – 2.50 (m, 1H).**13C NMR** (101 MHz, Chloroform-*d*) δ 143.5, 141.3, 140.4, 133.7, 129.2, 128.5, 128.4, 128.0, 127.4, 126.2, 125.9, 124.8, 121.5, 120.22, 120.15, 118.0, 117.0, 100.5, 59.8, 35.1, 28.6.**HRMS(ESI+)** m/z calcd. for C25H21N+ [M+H]+: 336.1747, found: 336.1746.

**4-(4-phenyl-4*H*-pyrrolo[3,2,1-*ij*]quinolin-2-yl)butanenitrile (5b)**

Prepared according to **GP3**. White solid (47.8mg, 80%, 0.2 mmol scale);**1H NMR** (400 MHz, Chloroform-*d*) δ 7.38 (d, *J* = 8.0 Hz, 1H), 7.31 – 7.21 (m, 3H), 7.03 (dd, *J* = 7.8, 1.5 Hz, 2H), 7.00 – 6.94 (m, 1H), 6.84 (d, *J* = 7.0 Hz, 1H), 6.58 – 6.49 (m, 1H), 6.23 (s, 1H), 6.14 (dd, *J* = 4.0, 1.5 Hz, 1H), 5.78 (dd, *J* = 9.8, 4.2 Hz, 1H), 2.57 (dt, *J* = 15.2, 7.4 Hz, 1H), 2.38 (dt, *J* = 15.3, 7.4 Hz, 1H), 2.30 – 2.19 (m, 1H), 2.20–2.09 (m, 1H), 1.82 – 1.60 (m, 2H).**13C NMR** (101 MHz, Chloroform-*d*) δ 143.2, 138.0, 133.8, 129.3, 128.2, 127.3 125.9, 124.6, 121.6, 120.4, 120.3, 119.4, 118.1, 117.4, 100.9, 59.9, 25.4, 24.1, 16.4. **HRMS(ESI+)** m/z calcd. for C21H18N2+ [M+H]+: 299.1543, found: 299.1543.

**methyl 4-(4-phenyl-4*H*-pyrrolo[3,2,1-*ij*]quinolin-2-yl)butanoate (5c)**

Prepared according to **GP3**. White oil (28.9 mg, 43%, 0.2 mmol scale);**1H NMR** (400 MHz, Chloroform-*d*) δ 7.37 (d, *J* = 8.0 Hz, 1H), 7.29 – 7.19 (m, 3H), 7.00 (d, *J* = 7.4 Hz, 2H), 6.98 – 6.92 (m, 1H), 6.81 (d, *J* = 7.0 Hz, 1H), 6.52 (dd, *J* = 9.8, 1.7 Hz, 1H), 6.23 (s, 1H), 6.15 (d, *J* = 5.3 Hz, 1H), 5.78 (dd, *J* = 9.8, 4.2 Hz, 1H), 2.48 – 2.38 (m, 1H), 2.32 – 2.16 (m, 3H), 1.93 – 1.70 (m, 2H).**13C NMR** (101 MHz, Chloroform-*d*) δ 173.8, 143.4, 139.8, 133.8, 129.2, 128.0, 127.3, 125.8, 124.8, 121.6, 120.2, 118.0, 117.1, 100.2, 59.8, 51.6, 33.3, 26.0, 23.4.**HRMS(ESI+)** m/z calcd. for C22H21NO2+ [M+Na]+: 354.1465, found: 354.1466.

**4-phenyl-2-(prop-1-en-2-yl)-4*H*-pyrrolo[3,2,1-*ij*]quinoline (5d)**

Prepared according to **GP3**. White oil (25.5 mg, 47%, 0.2 mmol scale);**1H NMR** (400 MHz, Chloroform-*d*) δ 7.45 (d, *J* = 8.0 Hz, 1H), 7.29 – 7.17 (m, 3H), 7.02 (t, *J* = 7.2 Hz, 1H), 6.92 – 6.85 (m, 3H), 6.60 – 6.55 (m, 1H), 6.51 (s, 1H), 6.48 – 6.42 (m, 1H), 5.88 (dd, *J* = 9.8, 4.6 Hz, 1H), 5.14 (s, 1H), 5.04 (s, 1H), 1.86 (s, 3H).**13C NMR** (101 MHz, Chloroform-*d*) δ 143.5, 141.2, 136.2, 135.0, 128.9, 127.8, 127.7, 125.6, 124.7, 121.5, 120.7, 120.6, 118.9, 118.0, 114.7, 103.2, 60.3, 23.5. **HRMS(ESI+)** m/z calcd. for C20H17N+ [M+H]+: 272.1434, found: 272.1433.

**3-(4-phenyl-4*H*-pyrrolo[3,2,1-*ij*]quinolin-2-yl)propyl 4-methylbenzenesulfonate (5e)**

Prepared according to **GP3**. Pale-Yellow oil (61.8 mg, 70%, 0.2 mmol scale);**1H NMR** (400 MHz, Chloroform-*d*) δ 7.69 (d, *J* = 8.3 Hz, 2H), 7.31 (d, *J* = 7.9 Hz, 1H), 7.28 – 7.19 (m, 5H), 7.00 – 6.91 (m, 3H), 6.80 (d, *J* = 7.0 Hz, 1H), 6.51 (dd, *J* = 9.8, 1.8 Hz, 1H), 6.08 – 6.02 (m, 2H), 5.75 (dd, *J* = 9.8, 4.2 Hz, 1H), 3.99 – 3.83 (m, 2H), 2.50 – 2.41 (m, 1H), 2.39 (s, 3H), 2.28 – 2.18 (m, 1H), 1.83 – 1.64 (m, 2H).**13C NMR** (101 MHz, Chloroform-*d*) δ 144.9, 143.2, 138.7, 133.7, 133.0, 129.9, 129.2, 128.1, 127.9, 127.3, 125.9, 124.7, 121.6, 120.2, 120.1, 118.0, 117.2, 100.5, 69.4, 59.8, 27.5, 22.5, 21.7. **HRMS(ESI+)** m/z calcd. for C27H25NO3S+ [M+Na]+: 466.1447, found: 466.1453.

**2-(3-chloropropyl)-4-phenyl-4*H*-pyrrolo[3,2,1-*ij*]quinoline** **(5f)**

Prepared according to **GP3**. White solid (50.4 mg, 82%, 0.2 mmol scale);**1H NMR** (400 MHz, Chloroform-*d*) δ 7.38 (d, *J* = 8.0 Hz, 1H), 7.32 – 7.21 (m, 3H), 7.04 (d, *J* = 8.1 Hz, 2H), 7.00 – 6.93 (m, 1H), 6.83 (d, *J* = 7.0 Hz, 1H), 6.54 (dd, *J* = 9.8, 1.7 Hz, 1H), 6.25 (s, 1H), 6.17 (dd, *J* = 4.0, 1.3 Hz, 1H), 5.80 (dd, *J* = 9.8, 4.2 Hz, 1H), 3.53 – 3.35 (m, 2H), 2.60 (dt, *J* = 15.2, 7.4 Hz, 1H), 2.40 (dt, *J* = 15.2, 7.3 Hz, 1H), 1.99 – 1.80 (m, 2H).**13C NMR** (101 MHz, Chloroform-*d*) δ 143.4, 139.2, 133.8, 129.3, 128.1, 127.4, 125.9, 124.8, 121.7, 120.3, 120.2, 118.1, 117.2, 100.6, 59.9, 44.3, 31.2, 23.8. **HRMS(ESI+)** m/z calcd. for C20H18ClN+ [M+H]+: 308.1201, found: 308.1200.

**2,4-diphenyl-4*H*-pyrrolo[3,2,1-*ij*]quinoline (5g)**

Prepared according to **GP3**. White solid (31.4 mg, 51%, 0.2 mmol scale);**1H NMR** (400 MHz, Chloroform-*d*) δ 7.47 (d, *J* = 7.9 Hz, 1H), 7.28 – 7.21 (m, 5H), 7.06 – 6.98 (m, 4H), 6.92 (d, *J* = 7.0 Hz, 1H), 6.68 – 6.61 (m, 3H), 6.49 (s, 1H), 6.34 (d, *J* = 5.8 Hz, 1H), 5.85 (dd, *J* = 9.8, 4.5 Hz, 1H).**13C NMR** (101 MHz, Chloroform-*d*) δ 142.8, 140.9, 134.8, 133.1, 128.7, 128.5, 128.3, 127.8, 127.6, 127.5, 125.9, 125.2, 121.9, 120.8, 120.7, 118.9, 117.9, 103.4, 59.8.**HRMS(ESI+)** m/z calcd. for C23H17N+ [M+H]+: 308.1434, found: 308.1434.

**4-phenyl-2-(4-(trifluoromethyl)phenyl)-4*H*-pyrrolo[3,2,1-*ij*]quinoline (5h)**

Prepared according to **GP3**. White solid (30.4 mg, 41%, 0.2 mmol scale);**1H NMR** (400 MHz, Chloroform-*d*) δ 7.55 – 7.47 (m, 3H), 7.35 (d, *J* = 8.0 Hz, 2H), 7.11 – 7.01 (m, 4H), 6.97 (d, *J* = 7.0 Hz, 1H), 6.69 – 6.63 (m, 3H), 6.57 (s, 1H), 6.34 (dd, *J* = 4.4, 1.4 Hz, 1H), 5.87 (dd, *J* = 9.8, 4.5 Hz, 1H).**13C NMR** (101 MHz, Chloroform-*d*) δ 142.5, 139.1, 136.8, 135.1, 129.7 (q, *J*C-F = 32.5 Hz), 128.8, 128.7, 127.9, 127.4, 125.8, 125.3 (q, *J*C-F = 3.5 Hz), 125.0, 121.9, 124.2 (q, *J*C-F = 273.3 Hz), 121.1, 119.0, 118.5, 104.5, 60.1.**19F NMR** (376 MHz, Chloroform-*d*) δ -64.1. **HRMS(ESI+)** m/z calcd. for C24H16F3N+ [M+H]+: 376.1308, found: 376.1310.

**2-(methoxymethyl)-4-phenyl-4*H*-pyrrolo[3,2,1-*ij*]quinoline (5i)**

Prepared according to **GP3**. White solid (22.6 mg, 41%, 0.2 mmol scale);**1H NMR** (400 MHz, Chloroform-*d*) δ 7.40 (d, *J* = 7.9 Hz, 1H), 7.32 – 7.21 (m, 3H), 7.13 – 7.08 (m, 2H), 6.99 – 6.94 (m, 1H), 6.86 (d, *J* = 7.0 Hz, 1H), 6.53 (dd, *J* = 9.9, 1.9 Hz, 1H), 6.40 (s, 1H), 6.35 (dd, *J* = 4.0, 1.7 Hz, 2H), 5.77 (dd, *J* = 9.8, 4.1 Hz, 1H), 4.08 (d, *J* = 6.5 Hz, 2H), 3.20 (s, 3H). **13C NMR** (101 MHz, Chloroform-*d*) δ 143.1, 135.6, 134.7, 129.1, 128.1, 127.9, 126.4, 124.0, 121.3, 120.9, 120.4, 118.4, 118.0, 104.0, 66.9, 60.2, 57.5.**HRMS(ESI+)** m/z calcd. for C19H17NO+ [M+H]+: 276.1383, found: 276.1382.

**2-(phenoxymethyl)-4-phenyl-4*H*-pyrrolo[3,2,1-*ij*]quinoline (5j)**

Prepared according toaforementioned method. White solid (32.3 mg, 48%, 0.2 mmol scale);**1H NMR** (400 MHz, Chloroform-*d*) δ 7.41 (d, *J* = 7.6 Hz, 1H), 7.17 – 7.27 (m, 5H), 7.04 (dd, *J* = 6.7, 2.7 Hz, 2H), 6.96 (dt, *J* = 14.4, 6.7 Hz, 2H), 6.88 (d, *J* = 7.0 Hz, 1H), 6.84 – 6.77 (m, 2H), 6.55 (dd, *J* = 10.6, 2.6 Hz, 1H), 6.50 (s, 1H), 6.38 (s, 1H), 5.76 (dd, *J* = 9.8, 3.9 Hz, 1H), 4.77 (d, *J* = 13.3 Hz, 1H), 4.53 (d, *J* = 11.9 Hz, 1H).**13C NMR** (101 MHz, Chloroform-*d*) δ 158.4, 142.6, 134.7, 134.3, 129.6, 129.1, 128.2 127.8, 126.5, 124.0, 121.4, 121.2, 121.1, 120.5, 118.4, 118.2, 114.8, 104.2, 62.8, 60.4.**HRMS(ESI+)** m/z calcd. for C24H19NO+ [M+H]+: 338.1539, found: 338.1543.

**4-phenyl-2-(2-(phenylsulfonyl)ethyl)-4*H*-pyrrolo[3,2,1-*ij*]quinoline (5k)**

Prepared according to **GP3**. White solid (51.1 mg, 64%, 0.2 mmol scale);**1H NMR** (400 MHz, Chloroform-*d*) δ 7.75 (dd, *J* = 8.3, 1.2 Hz, 2H), 7.65 – 7.60 (m, 1H), 7.50 (t, *J* = 7.8 Hz, 2H), 7.33 (d, *J* = 7.9 Hz, 1H), 7.27 – 7.22 (m, 3H), 7.00 – 6.92 (m, 3H), 6.84 (d, *J* = 7.0 Hz, 1H), 6.53 (dd, *J* = 9.8, 1.8 Hz, 1H), 6.15 (s, 1H), 6.07 (dd, *J* = 4.0, 1.6 Hz, 1H), 5.76 (dd, *J* = 9.8, 4.1 Hz, 1H), 3.23 – 3.15 (m, 1H), 2.98 – 2.80 (m, 2H), 2.69 – 2.60 (m, 1H).**13C NMR** (101 MHz, Chloroform-*d*) δ 142.9, 138.7, 135.6, 133.9, 133.8, 129.44, 129.38, 128.3, 128.2, 127.2, 126.0, 124.5, 121.6, 120.6, 120.4, 118.1, 117.7, 101.2, 59.9, 55.2, 20.6. **HRMS(ESI+)** m/z calcd. for C25H21NO2S+ [M+Na]+: 422.1185, found: 422.1183.

**4-phenyl-2-propyl-4*H*-pyrrolo[3,2,1-*ij*]quinoline (5l)**

Prepared according to **GP3**. White oil (46.0 mg, 84%, 0.2 mmol scale);**1H NMR** (400 MHz, Chloroform-*d*) δ 7.38 (d, *J* = 8.0 Hz, 1H), 7.31 – 7.21 (m, 3H), 7.06 – 7.00 (m, 2H), 6.99 – 6.93 (m, 1H), 6.81 (d, *J* = 7.0 Hz, 1H), 6.54 (dd, *J* = 9.8, 1.7 Hz, 1H), 6.23 (s, 1H), 6.17 (d, *J* = 2.6 Hz, 1H), 5.80 (dd, *J* = 9.8, 4.2 Hz, 1H), 2.41 – 2.30 (m, 1H), 2.25 – 2.16 (m, 1H), 1.65 – 1.42 (m, 2H), 0.85 (t, *J* = 7.4 Hz, 3H).**13C NMR** (101 MHz, Chloroform-*d*) δ 143.6, 141.3, 133.8, 129.2, 127.9, 127.4, 125.9, 124.9, 121.7, 120.1, 120.0, 118.0, 116.9, 100.0, 59.8, 28.8, 21.5, 14.0.**HRMS(ESI+)** m/z calcd. for C20H19N+ [M+H]+: 274.1590, found: 274.1588.

**2-(3-(4-phenyl-4*H*-pyrrolo[3,2,1-*ij*]quinolin-2-yl)propyl)isoindoline-1,3-dione (5m)**

Prepared according to **GP3**. White solid (60.1 mg, 72%, 0.2 mmol scale);**1H NMR** (400 MHz, Chloroform-*d*) δ 7.82 – 7.76 (m, 2H), 7.69 – 7.64 (m, 2H), 7.35 (d, *J* = 7.9 Hz, 1H), 7.21 – 7.10 (m, 3H), 7.00 (d, *J* = 6.6 Hz, 2H), 6.96 – 6.90 (m, 1H), 6.79 (d, *J* = 7.0 Hz, 1H), 6.52 (dd, *J* = 9.8, 1.7 Hz, 1H), 6.28 (s, 1H), 6.16 (d, *J* = 2.5 Hz, 1H), 5.78 (dd, *J* = 9.8, 4.1 Hz, 1H), 3.67 (t, *J* = 7.0 Hz, 2H), 2.49 – 2.39 (m, 1H), 2.34 – 2.25 (m, 1H), 2.08 – 1.95 (m, 1H), 1.91 – 1.78 (m, 1H).**13C NMR** (101 MHz, Chloroform-*d*) δ 168.4, 143.2, 139.5, 133.9, 133.7, 132.0, 129.1, 127.9, 127.3, 125.9, 124.7, 123.2, 121.5, 120.2, 120.1, 117.9, 117.0, 100.2, 59.8, 37.6, 26.8, 24.4.**HRMS(ESI+)** m/z calcd. for C28H22N2O2+ [M+Na]+: 441.1573, found: 441.1575.

**4-(4-phenyl-4*H*-pyrrolo[3,2,1-*ij*]quinolin-2-yl)butyl thiophene-2-carboxylate (5n)**

Prepared according to **GP3**. White oil (66.2 mg, 80%, 0.2 mmol scale);**1H NMR** (400 MHz, Chloroform-*d*) δ 7.74 (dd, *J* = 3.7, 1.3 Hz, 1H), 7.50 (dd, *J* = 5.0, 1.2 Hz, 1H), 7.35 (d, *J* = 8.0 Hz, 1H), 7.27 – 7.17 (m, 3H), 7.06 (dd, *J* = 5.0, 3.8 Hz, 1H), 6.99 (dd, *J* = 8.0, 1.3 Hz, 2H), 6.94 (dd, *J* = 8.0, 7.1 Hz, 1H), 6.79 (d, *J* = 7.0 Hz, 1H), 6.51 (dd, *J* = 9.8, 1.8 Hz, 1H), 6.23 (s, 1H), 6.13 (dd, *J* = 4.0, 1.6 Hz, 1H), 5.76 (dd, *J* = 9.8, 4.2 Hz, 1H), 4.15 (t, *J* = 6.1 Hz, 2H), 2.47 – 2.40 (m, 1H), 2.32 – 2.23 (m, 1H), 1.69 – 1.59 (m, 3H), 1.59 – 1.46 (m, 1H).**13C NMR** (101 MHz, Chloroform-*d*) δ 162.3, 143.4, 140.5, 134.0, 133.8, 133.5, 132.4, 129.2, 128.0, 127.9, 127.3, 125.9, 124.8, 121.6, 120.2, 118.0, 117.0, 100.2, 64.9, 59.9, 28.3, 26.3, 24.7. **HRMS(ESI+)** m/z calcd. for C26H23NO2S+ [M+Na]+: 436.1342, found: 436.1349.

**7-bromo-2-phenethyl-4-phenyl-4*H*-pyrrolo[3,2,1-*ij*]quinoline (5o)**

Prepared according to **GP3**. White solid (53.7 mg, 65%, 0.2 mmol scale);**1H NMR** (400 MHz, Chloroform-*d*) δ 7.27 – 7.17 (m, 6H), 7.17 – 7.13 (m, 1H), 7.07 (d, *J* = 8.4 Hz, 1H), 6.98 – 6.91 (m, 4H), 6.67 (dd, *J* = 9.9, 1.8 Hz, 1H), 6.20 (s, 1H), 5.86 (dd, *J* = 4.2, 1.6 Hz, 1H), 5.77 (dd, *J* = 9.9, 4.3 Hz, 1H), 2.80 – 2.70 (m, 1H), 2.68 – 2.47 (m, 3H).**13C NMR** (101 MHz, Chloroform-*d*) δ 142.8, 141.1, 140.9, 134.4, 129.3, 128.9, 128.5, 128.4, 128.2, 126.2, 125.9, 124.1, 123.8, 121.2, 120.0, 117.7, 112.0, 100.7, 59.6, 34.9, 28.5.**HRMS(ESI+)** m/z calcd. for C25H20BrN+ [M+H]+: 414.0852, found: 414.0848.

**5-bromo-2-phenethyl-4-phenyl-4*H*-pyrrolo[3,2,1-*ij*]quinoline (5p)**

Prepared according to **GP3**. White solid (34.2 mg, 40%, 0.2 mmol scale);**1H NMR** (400 MHz, Chloroform-*d*) δ 7.48 (d, *J* = 7.9 Hz, 1H), 7.37 – 7.32 (m, 3H), 7.32 – 7.29 (m, 2H), 7.28 – 7.24 (d, *J* = 7.1 Hz, 1H), 7.17 – 7.12 (m, 2H), 7.06 (q, *J* = 7.9 Hz, 4H), 6.92 (d, *J* = 7.1 Hz, 1H), 6.31 (s, 1H), 6.06 (s, 1H), 2.88 – 2.60 (m, 4H).**13C NMR** (101 MHz, Chloroform-*d*) δ 141.1, 140.6, 132.3, 128.9, 128.8, 128.6, 128.5, 127.2, 126.3, 126.0, 124.8, 121.4, 120.9, 120.4, 117.5, 117.2, 101.4, 65.7, 35.1, 28.5.**HRMS(ESI+)** m/z calcd. for C25H20BrN + [M+H]+: 414.0852, found: 414.0852.

**6-bromo-2-phenethyl-4-phenyl-4*H*-pyrrolo[3,2,1-*ij*]quinoline** **(5q)**

Prepared according to **GP3**. White solid (49.3 mg, 60%, 0.2 mmol scale);**1H NMR** (400 MHz, Chloroform-*d*) δ 7.47 (d, *J* = 7.8 Hz, 1H), 7.36 – 2.78 (m, 3H), 7.28 – 7.26 (m, 1H), 7.25 – 7.23 (m, 1H), 7.23 – 7.16 (m, 1H), 7.12 (d, *J* = 6.9 Hz, 1H), 7.07 (d, *J* = 7.7 Hz, 1H), 7.05 – 6.98 (m, 4H), 6.31 (s, 1H), 6.13 (d, *J* = 4.5 Hz, 1H), 6.03 (d, *J* = 4.5 Hz, 1H), 2.88 – 2.77 (m, 1H), 2.76 – 2.54 (m, 3H).**13C NMR** (101 MHz, Chloroform-*d*) δ 142.3, 141.1, 140.5, 133.7, 129.4, 128.54, 128.47, 128.4, 127.7, 126.3, 125.9, 124.9, 121.7, 120.2, 118.0, 117.6, 117.5, 101.1, 61.7, 35.1, 28.6. **HRMS(ESI+)** m/z calcd. for C25H20BrN + [M+H]+: 414.0852, found: 414.0850.

**8-bromo-2-phenethyl-4-phenyl-4*H*-pyrrolo[3,2,1-*ij*]quinoline (5r)**

Prepared according to **GP3**. White solid (62.5 mg, 76%, 0.2 mmol scale); **1H NMR** (400 MHz, Chloroform-*d*) δ 7.51 (s, 1H), 7.32 – 7.27 (m, 3H), 7.25 – 7.21 (m, 2H), 7.20 – 7.15 (m, 1H), 6.99 (d, *J* = 7.8 Hz, 4H), 6.93 (s, 1H), 6.45 (d, *J* = 9.8 Hz, 1H), 6.21 (s, 1H), 5.96 (d, *J* = 4.0 Hz, 1H), 5.81 (dd, *J* = 9.8, 4.2 Hz, 1H), 2.83 – 2.76 (m, 1H), 2.72 – 2.54 (m, 3H).**13C NMR** (101 MHz, Chloroform-*d*) δ 142.9, 141.6, 141.1, 132.2, 129.4, 128.8, 128.5, 128.4, 128.3, 126.3, 125.9, 122.4, 120.5, 119.7, 119.4, 113.2, 100.2, 59.8, 35.0, 28.6.**HRMS(ESI+)** m/z calcd. for C25H20BrN + [M+H]+: 414.0852, found: 414.0852.

**9-bromo-2-phenethyl-4-phenyl-4*H*-pyrrolo[3,2,1-*ij*]quinoline (5s)**

Prepared according to **GP3**. White solid (39.6 mg, 48%, 0.2 mmol scale);**1H NMR** (400 MHz, Chloroform-*d*) δ 7.31 – 7.21 (m, 5H), 7.19 – 7.15 (m, 1H), 7.14 – 7.10 (m, 1H), 7.03 – 6.95 (m, 4H), 6.68 (d, *J* = 7.6 Hz, 1H), 6.48 (dd, *J* = 9.8, 1.7 Hz, 1H), 6.33 (s, 1H), 5.93 (dd, *J* = 4.1, 1.5 Hz, 1H), 5.76 (dd, *J* = 9.8, 4.2 Hz, 1H), 2.89 – 2.77 (m, 1H), 2.73 – 2.52 (m, 3H).**13C NMR** (101 MHz, Chloroform-*d*) δ 142.9, 141.4, 141.1, 133.7, 129.3, 128.6, 128.4, 128.2, 127.6, 126.3, 125.9, 125.8, 122.9, 120.9, 118.0, 117.3, 113.5, 100.7, 59.9, 35.1, 28.7.**HRMS(ESI+)** m/z calcd. for C25H20BrN + [M+H]+: 414.0852, found: 414.0844.

**9-methyl-2-phenethyl-4-phenyl-4*H*-pyrrolo[3,2,1-*ij*]quinoline (5t)**

Prepared according to **GP3**. White oil (51.2 mg, 73%, 0.2 mmol scale);**1H NMR** (400 MHz, Chloroform-*d*) δ 7.30 – 7.11 (m, 6H), 7.05 – 6.96 (m, 4H), 6.79 – 6.74 (m, 2H), 6.50 (dd, *J* = 9.8, 1.8 Hz, 1H), 6.31 (s, 1H), 5.98 (dd, *J* = 4.0, 1.3 Hz, 1H), 5.68 (dd, *J* = 9.8, 4.2 Hz, 1H), 2.90 – 2.76 (m, 1H), 2.74 – 2.55 (m, 3H), 2.51 (s, 3H).**13C NMR** (101 MHz, Chloroform-*d*) δ 143.6, 141.4, 139.9, 133.3, 130.2, 129.2, 128.5, 128.4, 127.9, 126.2, 126.1, 125.9, 124.9, 121.5, 120.1, 117.3, 116.0, 99.1, 59.8, 35.3, 28.7, 19.0.**HRMS(ESI+)** m/z calcd. for C26H23N + [M+H]+: 350.1903, found: 350.1894.

**7-methyl-2-phenethyl-4-phenyl-4*H*-pyrrolo[3,2,1-*ij*]quinoline (5u)**

Prepared according to **GP3**. White oil (48.1 mg, 70%, 0.2 mmol scale);**1H NMR** (400 MHz, Chloroform-*d*) δ 7.33 – 7.27 (m, 4H), 7.25 (d, *J* = 7.5 Hz, 2H), 7.20 (d, *J* = 7.2 Hz, 1H), 7.03 (d, *J* = 7.6 Hz, 4H), 6.84 (d, *J* = 8.1 Hz, 1H), 6.75 – 6.69 (m, 1H), 6.25 (s, 1H), 6.03 (d, *J* = 4.1 Hz, 1H), 5.80 (dd, *J* = 10.0, 4.3 Hz, 1H), 2.89 – 2.79 (m, 1H), 2.76 – 2.53 (m, 3H), 2.42 (s, 3H).**13C NMR** (101 MHz, Chloroform-*d*) δ 143.8, 141.4, 139.8, 134.1, 129.2, 128.46, 128.45, 128.0, 126.7, 126.1, 125.8, 125.3, 123.2, 122.7, 119.9, 119.0, 115.9, 100.3, 59.4, 35.2, 28.6, 17.1.**HRMS(ESI+)** m/z calcd. for C26H23N + [M+H]+: 350.1903, found: 350.1902.

**8-methoxy-2-phenethyl-4-phenyl-4*H*-pyrrolo[3,2,1-*ij*]quinoline (5v)**

Prepared according to **GP3**. White oil (58.3 mg, 80%, 0.2 mmol scale);**1H NMR** (400 MHz, Chloroform-*d*) δ 7.33 – 7.20 (m, 5H), 7.19 – 7.15 (m, 1H), 7.03 – 6.93 (m, 4H), 6.88 (d, *J* = 2.1 Hz, 1H), 6.54 (d, *J* = 2.0 Hz, 1H), 6.48 (dd, *J* = 9.8, 1.7 Hz, 1H), 6.21 (s, 1H), 5.99 (d, *J* = 3.0 Hz, 1H), 5.81 (dd, *J* = 9.7, 4.2 Hz, 1H), 3.84 (s, 3H), 2.86 – 2.74 (m, 1H), 2.73 – 2.51 (m, 3H).**13C NMR** (101 MHz, Chloroform-*d*) δ 155.1, 143.3, 141.4, 140.5, 129.3, 129.1, 128.51, 128.49, 128.45, 128.1, 126.2, 125.9, 124.7, 121.3, 118.5, 107.5, 102.1, 100.1, 59.8, 56.2, 35.2, 28.7.**HRMS(ESI+)** m/z calcd. for C26H23NO + [M+H]+: 366.1852, found: 366.1854.

**methyl 2-phenethyl-4-phenyl-4*H*-pyrrolo[3,2,1-*ij*]quinoline-8-carboxylate (5w)**

Prepared according to **GP3**. White oil (29.3 mg, 37%, 0.2 mmol scale);**1H NMR** (400 MHz, Chloroform-*d*) δ 8.20 (s, 1H), 7.55 (s, 1H), 7.32 – 7.13 (m, 6H), 7.02 – 6.95 (m, 4H), 6.54 (dd, *J* = 9.8, 1.8 Hz, 1H), 6.34 (s, 1H), 5.97 (dd, *J* = 4.0, 1.5 Hz, 1H), 5.79 (dd, *J* = 9.8, 4.1 Hz, 1H), 3.90 (s, 3H), 2.84 – 2.73 (m, 1H), 2.72 – 2.53 (m, 3H).**13C NMR** (101 MHz, Chloroform-*d*) δ 168.4, 142.8, 142.0, 141.0, 136.2, 129.3, 128.5, 128.4, 128.3, 128.2, 126.2, 125.9, 124.3, 123.6, 122.3, 121.1, 118.2, 117.6, 101.9, 59.9, 51.9, 34.9, 28.5. **HRMS(ESI+)** m/z calcd. for C27H23NO2 + [M+Na]+: 416.1621, found: 416.1620.

**8-chloro-2-phenethyl-4-phenyl-4*H*-pyrrolo[3,2,1-*ij*]quinoline (5x)**

Prepared according to **GP3**. White solid (48.0mg, 65%, 0.2 mmol scale);**1H NMR** (400 MHz, Chloroform-*d*) δ 7.35 (d, *J* = 1.5 Hz, 1H), 7.33 – 7.20 (m, 5H), 7.21 – 7.15 (m, 1H), 6.99 (d, *J* = 7.5 Hz, 4H), 6.81 (d, *J* = 1.4 Hz, 1H), 6.45 (dd, *J* = 9.8, 1.5 Hz, 1H), 6.21 (s, 1H), 5.96 (d, *J* = 3.9 Hz, 1H), 5.81 (dd, *J* = 9.8, 4.2 Hz, 1H), 2.83 – 2.75 (m, 1H), 2.72 – 2.53 (m, 3H).**13C NMR** (101 MHz, Chloroform-*d*) δ 142.9, 141.7, 141.1, 132.0, 129.4, 128.8, 128.5, 128.4, 128.3, 126.3, 125.9, 125.7, 125.6, 120.6, 119.4, 119.0, 117.2, 100.2, 59.8, 35.0, 28.6.**HRMS(ESI+)** m/z calcd. for C25H20ClN+ [M+H]+: 370.1357, found: 370.1353.

**9-chloro-2-phenethyl-4-phenyl-4*H*-pyrrolo[3,2,1-*ij*]quinoline (5y)**

Prepared according to **GP3**. White solid (52.6 mg, 71%, 0.2 mmol scale); **1H NMR** (400 MHz, Chloroform-*d*) δ 7.34 – 7.15 (m, 6H), 7.04 – 6.98 (m, 4H), 6.96 (d, *J* = 7.6 Hz, 1H), 6.74 (d, *J* = 7.5 Hz, 1H), 6.50 (dd, *J* = 9.8, 1.8 Hz, 1H), 6.39 (s, 1H), 5.96 (dd, *J* = 4.2, 1.6 Hz, 1H), 5.76 (dd, *J* = 9.8, 4.2 Hz, 1H), 2.89 – 2.79 (m, 1H), 2.75 – 2.54 (m, 3H).**13C NMR** (101 MHz, Chloroform-*d*) δ 143.0, 141.3, 141.1, 134.2, 129.4, 128.6, 128.4, 128.3, 127.5, 126.3, 125.9, 125.1, 123.8, 120.9, 119.8, 117.7, 116.9, 99.2, 59.8, 35.1, 28.7.**HRMS(ESI+)** m/z calcd. for C25H20ClN+ [M+H]+: 370.1357, found: 370.1360.

**8-iodo-2-phenethyl-4-phenyl-4*H*-pyrrolo[3,2,1-*ij*]quinoline (5z)**

Prepared according to **GP3**. White solid (61.9 mg, 67%, 0.2 mmol scale);**1H NMR** (400 MHz, Chloroform-*d*) δ 7.72 (s, 1H), 7.34 – 7.25 (m, 3H), 7.23 (d, *J* = 7.8 Hz, 2H), 7.20 – 7.14 (m, 1H), 7.10 (s, 1H), 6.98 (d, *J* = 7.6 Hz, 4H), 6.44 (dd, *J* = 9.8, 1.7 Hz, 1H), 6.19 (s, 1H), 5.97 – 5.93 (m, 1H), 5.78 (dd, *J* = 9.8, 4.2 Hz, 1H), 2.83 – 2.52 (m, 4H). **13C NMR** (101 MHz, Chloroform-*d*) δ 142.9, 141.3, 141.1, 132.6, 129.4, 128.8, 128.6, 128.5, 128.4, 128.3, 127.2, 126.3, 125.9, 125.1, 120.3, 120.0, 99.9, 83.4, 59.7, 35.0, 28.5. **HRMS(ESI+)** m/z calcd. for C25H20IN+ [M+H]+: 462.0713, found: 462.0715.

**6,9-dichloro-2-phenethyl-4-phenyl-4*H*-pyrrolo[3,2,1-*ij*]quinoline (5aa)**

Prepared according to **GP3**. White solid (40.4 mg, 50%, 0.2 mmol scale);**1H NMR** (400 MHz, Chloroform-*d*) δ 7.34 – 7.28 (m, 3H), 7.28 – 7.21 (m, 2H), 7.21 – 7.16 (m, 1H), 7.10 – 7.01 (m, 2H), 7.01 – 6.94 (m, 4H), 6.40 (s, 1H), 5.96 (d, *J* = 4.5 Hz, 1H), 5.86 (d, *J* = 4.5 Hz, 1H), 2.88 – 2.77 (m, 1H), 2.74 – 2.52 (m, 3H).**13C NMR** (101 MHz, Chloroform-*d*) δ 141.9, 141.4, 140.9, 134.3, 129.5, 128.7, 128.6, 128.4, 126.74, 126.70, 126.4, 125.9, 123.9, 123.6, 119.8, 116.5, 115.6, 99.9, 61.0, 35.0, 28.6.**HRMS(ESI+)** m/z calcd. for C25H19Cl2N+ [M+H]+: 404.0967, found: 404.0970.

**6-chloro-8-fluoro-2-phenethyl-4-phenyl-4*H*-pyrrolo[3,2,1-*ij*]quinoline (5ab)**

Prepared according to **GP3**. White solid (31.6 mg, 41%, 0.2 mmol scale); **1H NMR** (400 MHz, Chloroform-*d*) δ 7.32 – 7.25 (m, 3H), 7.25 – 7.19 (m, 2H), 7.25 – 7.19 (m, 1H), 7.19 – 7.14 (m, 1H), 7.00 – 6.90 (m, 5H), 6.24 (s, 1H), 5.95 (d, *J* = 4.5 Hz, 1H), 5.91 (d, *J* = 4.5 Hz, 1H), 2.87 – 2.72 (m, 1H), 2.70 – 2.48 (m, 3H).**13C NMR** (101 MHz,

Chloroform-*d*) δ 158.6 (d, *J*C-F = 233.6 Hz), 141.9 (d, *J*C-F = 8.6 Hz), 140.9, 129.5, 128.60, 128.55, 128.4, 126.4, 126.3, 125.9, 125.3, 124.7 (d, *J*C-F = 10.4 Hz), 117.3 (d, *J*C-F = 10.7 Hz), 106.2 (d, *J*C-F = 24.6 Hz), 104.4 (d, *J*C-F = 29.5 Hz), 101.3 (d, *J*C-F = 4.4 Hz), 60.8, 34.9, 28.6. **19F NMR** (376 MHz, Chloroform-*d*) δ -125.5. **HRMS(ESI+)** m/z calcd. for C25H19ClFN+ [M+H]+: 388.1263, found: 388.1266.

**9-bromo-6-chloro-2-phenethyl-4-phenyl-4*H*-pyrrolo[3,2,1-*ij*]quinoline (5ac)**

Prepared according to **GP3**. White solid (36.9 mg, 41%, 0.2 mmol scale);**1H NMR** (400 MHz, Chloroform-*d*) δ 7.34 – 7.27 (m, 3H), 7.25 – 7.17 (m, 4H), 7.03 – 6.94 (m, 5H), 6.35 (s, 1H), 5.94 (d, *J* = 4.5 Hz, 1H), 5.88 (d, *J* = 4.5 Hz, 1H), 2.87 – 2.76 (m, 1H), 2.74 – 2.50 (m, 3H).**13C NMR** (101 MHz, Chloroform-*d*) δ 141.8, 141.4, 140.9, 133.8, 129.5, 128.7, 128.6, 128.4, 126.8, 126.4, 125.9, 125.7, 124.0, 122.9, 116.8, 116.1, 115.3, 101.4, 61.0, 35.0, 28.7.**HRMS(ESI+)** m/z calcd. for C25H19BrClN+ [M+H]+: 448.0462, found: 448.0452.

**6-chloro-2-phenethyl-4-phenyl-9-(trifluoromethyl)-4*H*-pyrrolo[3,2,1-*ij*]quinoline (5ad)**

Prepared according to **GP3**. White solid (48.2 mg, 55%, 0.2 mmol scale); **1H NMR** (400 MHz, Chloroform-*d*) δ 7.31 – 7.39 (m, 4H), 7.29 – 7.18 (m, 4H), 7.02 – 6.97 (m, 4H), 6.52 (s, 1H), 6.03 – 5.95 (m, 2H), 2.90 – 2.78 (m, 1H), 2.76 – 2.53 (m, 3H).**13C NMR** (101 MHz, Chloroform-*d*) δ 142.5, 141.6, 140.9, 134.2, 129.6, 128.8, 128.6, 128.4, 126.5, 126.4, 126.1, 126.0, 125.0 (q, *J*C-F = 273.3 Hz),122.2 (q, *J*C-F = 32.5 Hz), 119.8, 118.0 (q, *J*C-F = 4.7 Hz), 114.9, 100.4, 60.8, 35.0, 28.8.**19F NMR** (376 MHz, Chloroform-*d*) δ -63.2. **HRMS(ESI+)** m/z calcd. for C26H19ClF3N+ [M+H]+: 438.1231, found: 438.1232.

**5-phenethyl-7-phenyl-7*H*-pyrrolo[3,2,1-*de*]phenanthridine (5ae)**

Prepared according to **GP3**. White solid (54.0 mg, 70%, 0.2 mmol scale);**1H NMR** (400 MHz, Chloroform-*d*) δ 7.92 (d, *J* = 7.5 Hz, 1H), 7.55 (d, *J* = 7.3 Hz, 1H), 7.49 (d, *J* = 7.9 Hz, 1H), 7.24 (t, *J* = 7.3 Hz, 3H), 7.20 – 7.16 (m, 2H), 7.16 – 7.09 (m, 5H), 7.08 – 7.03 (m, 2H), 6.93 (dd, *J* = 7.4, 2.0 Hz, 2H), 6.38 (s, 1H), 6.34 (s, 1H), 2.91 – 2.81 (m, 2H), 2.76 – 2.66 (m, 2H). **13C NMR** (101 MHz, Chloroform-*d*) δ 144.7, 141.3, 140.7, 134.9, 134.0, 129.1, 128.7, 128.6, 128.52, 128.47, 127.9, 127.83, 127.79, 126.3, 126.2, 125.7, 122.8, 120.5, 119.9, 117.7, 113.2, 101.2, 61.4, 35.1, 28.6.**HRMS(ESI+)** m/z calcd. for C29H23N+ [M+H]+: 386.1903, found: 386.1900.

**4-(4-methoxyphenyl)-2-phenethyl-4*H*-pyrrolo[3,2,1-*ij*]quinoline (5af)**

Prepared according to **GP3**. White oil (58.5 mg, 80%, 0.2 mmol scale); **1H NMR** (400 MHz, Chloroform-*d*) δ 7.38 (d, *J* = 8.0 Hz, 1H), 7.23 (d, *J* = 7.5 Hz, 2H), 7.18 (d, *J* = 7.2 Hz, 1H), 7.04 (d, *J* = 7.1 Hz, 2H), 6.98 – 6.92 (m, 3H), 6.81 (t, *J* = 7.4 Hz, 3H), 6.52 (dd, *J* = 9.8, 1.5 Hz, 1H), 6.26 (s, 1H), 5.99 (d, *J* = 3.9 Hz, 1H), 5.74 (dd, *J* = 9.8, 4.2 Hz, 1H), 3.75 (s, 3H), 2.89 – 2.78 (m, 1H), 2.77 – 2.58 (m, 3H).**13C NMR** (101 MHz, Chloroform-*d*) δ 159.3, 141.4, 140.5, 135.9, 133.6, 128.49, 128.46, 127.7, 127.1, 126.2, 124.8, 121.2, 120.1, 120.1, 118.1, 116.9, 114.5, 100.4, 59.2, 55.4, 35.1, 28.6. **HRMS(ESI+)** m/z calcd. for C26H23NO+ [M+H]+: 366.1852, found: 366.1858.

**4-(2-methoxyphenyl)-2-phenethyl-4*H*-pyrrolo[3,2,1-*ij*]quinoline (5ag)**

Prepared according to **GP3**. White oil (53.9 mg, 74%, 0.2 mmol scale);**1H NMR** (400 MHz, Chloroform-*d*) δ 7.40 (d, *J* = 7.7 Hz, 1H), 7.25 – 7.15 (m, 4H), 7.04 (d, *J* = 6.9 Hz, 2H), 7.00 – 6.95 (m, 1H), 6.89 (d, *J* = 8.2 Hz, 1H), 6.83 – 6.77 (m, 2H), 6.61 (d, *J* = 4.1 Hz, 1H), 6.55 (dd, *J* = 9.8, 1.7 Hz, 1H), 6.50 (d, *J* = 7.6 Hz, 1H), 6.30 (s, 1H), 5.92 (dd, *J* = 9.8, 4.3 Hz, 1H), 3.87 (s, 3H), 2.93 – 2.83 (m, 1H), 2.77 – 2.55 (m, 3H).**13C NMR** (101 MHz, Chloroform-*d*) δ 141.6, 140.3, 134.0, 131.8, 128.9, 128.4, 127.6, 126.5, 126.1, 121.8, 121.7, 120.1, 120.0, 118.4, 116.7, 110.4, 100.1, 77.5, 76.8, 55.5, 52.8, 28.3.**HRMS(ESI+)** m/z calcd. for C26H23NO+ [M+H]+: 366.1852, found: 366.1852.

**4-([1,1'-biphenyl]-4-yl)-2-phenethyl-4*H*-pyrrolo[3,2,1-*ij*]quinoline (5ah)**

Prepared according to **GP3**. White solid (57.7 mg, 70%, 0.2 mmol scale);**1H NMR** (400 MHz, Chloroform-*d*) δ 7.56 – 7.52 (m, 4H), 7.46 – 7.40 (m, 3H), 7.37 – 7.32 (m, 1H), 7.26 – 7.22 (m, 2H), 7.19 (d, *J* = 7.3 Hz, 1H), 7.10 (d, *J* = 8.2 Hz, 2H), 7.04 (d, *J* = 7.1 Hz, 2H), 7.02 – 6.97 (m, 1H), 6.86 (d, *J* = 7.0 Hz, 1H), 6.57 (dd, *J* = 9.9, 1.7 Hz, 1H), 6.32 (s, 1H), 6.09 (d, *J* = 4.0 Hz, 1H), 5.81 (dd, *J* = 9.8, 4.2 Hz, 1H), 2.92 – 2.83 (m, 1H), 2.81 – 2.62 (m, 3H).**13C NMR** (101 MHz, Chloroform-*d*) δ 142.5, 141.3, 141.0, 140.7, 140.5, 133.7, 128.9, 128.51, 128.46, 128.0, 127.6, 127.24, 127.19, 126.3, 126.2, 124.9, 121.7, 120.3, 120.2, 118.1, 117.1, 100.6, 59.5, 35.2, 28.7.**HRMS(ESI+)** m/z calcd. for C31H25N+ [M+H]+: 412.2060, found: 412.2055.

**4-(4-fluorophenyl)-2-phenethyl-4*H*-pyrrolo[3,2,1-*ij*]quinoline (5ai)**

Prepared according to **GP3**. White solid (55.2 mg, 78%, 0.2 mmol scale);**1H NMR** (400 MHz, Chloroform-*d*) δ 7.40 (d, *J* = 8.0 Hz, 1H), 7.25 – 7.21 (m, 2H), 7.21 – 7.15 (m, 1H), 7.02 (d, *J* = 6.7 Hz, 2H), 7.00 – 6.90 (m, 5H), 6.83 (d, *J* = 7.0 Hz, 1H), 6.52 (dd, *J* = 9.8, 1.7 Hz, 1H), 6.29 (s, 1H), 5.98 (d, *J* = 4.1 Hz, 1H), 5.70 (dd, *J* = 9.8, 4.2 Hz, 1H), 2.96 – 2.51 (m, 4H).**13C NMR** (101 MHz, Chloroform-*d*) δ 162.4 (d, *J*C-F = 246.6 Hz), 141.2, 140.3, 139.44 (d, *J*C-F = 3.0 Hz), 133.6, 128.5, 128.4, 127.5 (d, *J*C-F = 8.2 Hz), 127.1, 126.2, 124.9, 121.7, 120.3 (d, *J*C-F = 8.9 Hz), 117.9, 117.2, 116.2, 116.0, 100.7, 59.0, 35.0, 28.6.**19F NMR** (376 MHz, Chloroform-*d*) δ -113.9. **HRMS(ESI+)** m/z calcd. for C25H20FN+ [M+H]+: 354.1653, found: 354.1651.

**4-(4-chlorophenyl)-2-phenethyl-4*H*-pyrrolo[3,2,1-*ij*]quinoline (5aj)**

Prepared according to **GP3**. White solid (52.3 mg, 71%, 0.2 mmol scale);**1H NMR** (400 MHz, Chloroform-*d*) δ 7.46 (d, *J* = 7.9 Hz, 1H), 7.35 – 7.20 (m, 5H), 7.08 (d, *J* = 7.0 Hz, 2H), 7.06 – 7.02 (m, 1H), 6.96 (d, *J* = 8.4 Hz, 2H), 6.89 (d, *J* = 7.0 Hz, 1H), 6.58 (dd, *J* = 9.8, 1.7 Hz, 1H), 6.36 (s, 1H), 6.02 (dd, *J* = 4.1, 1.4 Hz, 1H), 5.75 (dd, *J* = 9.8, 4.2 Hz, 1H), 2.97 – 2.87 (m, 1H), 2.87 – 2.69 (m, 2H), 2.69 – 2.59 (m, 1H).**13C NMR** (101 MHz, Chloroform-*d*) δ 142.0, 141.2, 140.2, 133.8, 133.6, 129.4, 128.5, 128.4, 127.2, 126.8, 126.3, 124.9, 121.9, 120.4, 120.3, 117.8, 117.3, 100.7, 59.0, 35.0, 28.6. **HRMS(ESI+)** m/z calcd. for C25H20ClN+ [M+H]+: 370.1357, found: 370.1355.

**4-(3-methoxyphenyl)-2-phenethyl-4*H*-pyrrolo[3,2,1-*ij*]quinoline (5ak)**

Prepared according to **GP3**. White oil (54.6 mg, 75%, 0.2 mmol scale);**1H NMR** (400 MHz, Chloroform-*d*) δ 7.38 (d, *J* = 7.9 Hz, 1H), 7.25 – 7.15 (m, 4H), 7.03 (d, *J* = 7.0 Hz, 2H), 6.99 – 6.93 (m, 1H), 6.84 – 6.76 (m, 2H), 6.61 (d, *J* = 7.7 Hz, 1H), 6.58 – 6.50 (m, 2H), 6.28 (s, 1H), 6.01 (dd, *J* = 4.0, 1.4 Hz, 1H), 5.76 (dd, *J* = 9.8, 4.2 Hz, 1H), 3.70 (s, 3H), 2.89 – 2.78 (m, 1H), 2.76 – 2.60 (m, 3H).**13C NMR** (101 MHz, Chloroform-*d*) δ 160.4, 145.2, 141.4, 140.5, 133.7, 130.4, 128.49, 128.47, 127.2, 126.2, 124.9, 121.7, 120.2, 120.1, 118.3, 118.0, 117.0, 113.1, 111.7, 100.5, 59.8, 55.3, 35.2, 28.6. **HRMS(ESI+)** m/z calcd. for C26H23NO+ [M+H]+: 366.1852, found: 366.1842.

**4-(3-chlorophenyl)-2-phenethyl-4*H*-pyrrolo[3,2,1-*ij*]quinoline (5al)**

Prepared according to **GP3**. White solid (54.5 mg, 74%, 0.2 mmol scale);**1H NMR** (400 MHz, Chloroform-*d*) δ 7.39 (d, *J* = 7.9 Hz, 1H), 7.25 – 7.15 (m, 5H), 7.02 (d, *J* = 6.9 Hz, 3H), 7.00 – 6.93 (m, 1H), 6.88 – 6.80 (m, 2H), 6.54 (dd, *J* = 9.8, 1.8 Hz, 1H), 6.29 (s, 1H), 5.98 (dd, *J* = 4.1, 1.7 Hz, 1H), 5.70 (dd, *J* = 9.8, 4.2 Hz, 1H), 2.89 – 2.79 (m, 1H), 2.77 – 2.54 (m, 3H).**13C NMR** (101 MHz, Chloroform-*d*) δ 145.4, 141.2, 140.2, 135.2, 133.6, 130.6, 128.6, 128.5, 128.3, 126.5, 126.3, 126.0, 124.9, 124.1, 122.2, 120.5, 120.3, 117.8, 117.3, 100.9, 59.3, 35.2, 28.6.**HRMS(ESI+)** m/z calcd. for C25H20ClN+ [M+H]+: 370.1357, found: 370.1353.

**3-(2-phenethyl-4*H*-pyrrolo[3,2,1-*ij*]quinolin-4-yl)benzonitrile (5am)**

Prepared according to **GP3**. White solid (53.8 mg, 76%, 0.2 mmol scale);**1H NMR** (400 MHz, Chloroform-*d*) δ 7.54 (dt, *J* = 7.7, 1.3 Hz, 1H), 7.43 (d, *J* = 7.9 Hz, 1H), 7.38 (t, *J* = 7.8 Hz, 1H), 7.29 – 7.22 (m, 3H), 7.22 – 7.15 (m, 2H), 7.06 – 6.97 (m, 3H), 6.86 (d, *J* = 7.0 Hz, 1H), 6.57 (dd, *J* = 9.8, 1.7 Hz, 1H), 6.34 (s, 1H), 5.99 (dd, *J* = 4.2, 1.5 Hz, 1H), 5.69 (dd, *J* = 9.7, 4.3 Hz, 1H), 2.92 – 2.74 (m, 2H), 2.70 – 2.51 (m, 2H).**13C NMR** (101 MHz, Chloroform-*d*) δ 144.9, 141.0, 139.8, 133.5, 131.7, 130.2, 129.2, 128.6, 128.4, 126.4, 125.7, 125.0, 122.7, 120.6, 120.5, 118.5, 117.7, 117.6, 113.4, 101.3, 58.9, 35.0, 28.6. **HRMS(ESI+)** m/z calcd. for C26H20N2 + [M+H]+: 361.1699, found: 361.1695.

**4-(naphthalen-2-yl)-2-phenethyl-4*H*-pyrrolo[3,2,1-*ij*]quinoline (5an)**

Prepared according to **GP3**. White solid (52.5 mg, 68%, 0.2 mmol scale);**1H NMR** (400 MHz, Chloroform-*d*) δ 7.84 – 7.75 (m, 3H), 7.53 – 7.45 (m, 3H), 7.44 (d, *J* = 8.0 Hz, 1H), 7.19 – 6.98 (m, 4H), 7.05 – 6.98 (m, 1H), 6.94 – 6.89 (m, 2H), 6.87 (d, *J* = 7.0 Hz, 1H), 6.58 (dd, *J* = 9.8, 1.7 Hz, 1H), 6.31 (s, 1H), 6.23 (dd, *J* = 4.0, 1.4 Hz, 1H), 5.83 (dd, *J* = 9.8, 4.2 Hz, 1H), 2.88 – 2.78 (m, 1H), 2.76 – 2.58 (m, 3H). **13C NMR** (101 MHz, Chloroform-*d*) δ 141.2, 140.64, 140.58, 133.8, 133.5, 133.7, 129.5, 128.44, 128.40, 128.2, 127.9, 127.2, 126.6, 126.3, 126.1, 124.9, 124.2, 124.1, 121.9, 120.3, 120.2, 118.1, 117.1, 100.6, 60.1, 35.1, 28.6. **HRMS(ESI+)** m/z calcd. for C29H23N+ [M+H]+: 386.1903, found: 386.1902.

**2-phenethyl-4-(thiophen-2-yl)-4*H*-pyrrolo[3,2,1-*ij*]quinoline (5ao)**

Prepared according to **GP3**. White oil (48.9 mg, 72%, 0.2 mmol scale);**1H NMR** (400 MHz, Chloroform-*d*) δ 7.37 (d, *J* = 8.0 Hz, 1H), 7.27 – 7.21 (m, 2H), 7.21 – 7.12 (m, 2H), 7.07 (d, *J* = 8.0 Hz, 2H), 6.98 – 6.92 (m, 1H), 6.89 – 6.80 (m, 2H), 6.79 – 6.73 (m, 1H), 6.55 (dd, *J* = 9.7, 1.5 Hz, 1H), 6.26 (s, 2H), 5.78 (dd, *J* = 9.0, 4.9 Hz, 1H), 2.93 – 2.71 (m, 4H).**13C NMR** (101 MHz, Chloroform-*d*) δ 147.2, 141.4, 140.6, 133.0, 128.53, 128.48, 126.9, 126.6, 126.2, 125.6, 125.1, 123.8, 122.0, 120.4, 120.3, 117.6, 117.3, 100.9, 54.8, 35.2, 28.6. **HRMS(ESI+)** m/z calcd. for C23H19NS+ [M+H]+: 342.1311, found: 342.1312.

**4-(benzo[b]thiophen-3-yl)-2-phenethyl-4*H*-pyrrolo[3,2,1-*ij*]quinoline (5ap)**

Prepared according to **GP3**. White solid (50.2 mg, 64%, 0.2 mmol scale);**1H NMR** (400 MHz, Chloroform-*d*) δ 7.87 (d, *J* = 8.0 Hz, 1H), 7.48 – 7.41 (m, 2H), 7.35 (t, *J* = 7.1 Hz, 1H), 7.31 – 7.25 (m, 1H), 7.24 – 7.15 (m, 3H), 7.06 – 7.00 (m, 1H), 6.95 (d, *J* = 7.9 Hz, 3H), 6.89 (d, *J* = 7.0 Hz, 1H), 6.62 (dd, *J* = 9.8, 1.8 Hz, 1H), 6.48 (dd, *J* = 4.0, 1.6 Hz, 1H), 6.30 (s, 1H), 5.86 (dd, *J* = 9.7, 4.1 Hz, 1H), 2.87–– 2.75 (m, 1H), 2.75 – 2.62 (m, 3H).**13C NMR** (101 MHz, Chloroform-*d*) δ 141.21, 141.16, 140.6, 137.9, 136.3, 133.6, 128.5, 128.4, 126.2, 125.4, 125.1, 124.8, 124.7, 123.4, 123.2, 122.9, 121.8, 120.5, 120.3, 117.9, 117.3, 100.7, 55.1, 35.2, 28.6.**HRMS(ESI+)** m/z calcd. for C27H21NS+ [M+H]+: 392.1467, found: 392.1468.

**4-(1-methyl-1*H*-indol-5-yl)-2-phenethyl-4*H*-pyrrolo[3,2,1-*ij*]quinoline (5aq)**

Prepared according to **GP3**. White solid (40.5 mg, 52%, 0.2 mmol scale);**1H NMR** (400 MHz, Chloroform-*d*) δ 7.42 (d, *J* = 8.0 Hz, 1H), 7.35 (d, *J* = 1.2 Hz, 1H), 7.25 – 7.13 (m, 4H), 7.05 (d, *J* = 3.1 Hz, 1H), 7.01 – 6.96 (m, 3H), 6.93 (dd, *J* = 8.5, 1.6 Hz, 1H), 6.86 (d, *J* = 7.0 Hz, 1H), 6.53 (dd, *J* = 9.8, 1.7 Hz, 1H), 6.43 (d, *J* = 3.0 Hz, 1H), 6.28 (s, 1H), 6.18 (dd, *J* = 3.9, 1.3 Hz, 1H), 5.85 (dd, *J* = 9.8, 4.1 Hz, 1H), 3.76 (s, 3H), 2.88 – 2.57 (m, 4H).**13C NMR** (101 MHz, Chloroform-*d*) δ 141.5, 140.8, 136.5, 134.9, 133.7, 129.7, 128.8, 128.53, 128.50, 128.4, 126.0, 124.9, 120.7, 120.0, 118.3, 118.2, 116.8, 110.1, 101.3, 100.3, 60.3, 35.2, 33.0, 28.7. **HRMS(ESI+)** m/z calcd. for C28H24N2 + [M+H]+: 389.2012, found: 389.2010.

**4-methyl-2-phenethyl-4*H*-pyrrolo[3,2,1-*ij*]quinoline (5ar)**

Prepared according to **GP3**. White oil (47.1 mg, 86%, 0.2 mmol scale);**1H NMR** (400 MHz, Chloroform-*d*) δ 7.32 (dd, *J* = 14.4, 7.4 Hz, 3H), 7.28 – 7.19 (m, 3H), 6.92 (t, *J* = 7.5 Hz, 1H), 6.77 (d, *J* = 7.0 Hz, 1H), 6.55 (dd, *J* = 9.9, 1.3 Hz, 1H), 6.30 (s, 1H), 5.74 (dd, *J* = 9.8, 4.3 Hz, 1H), 5.11 (p, *J* = 6.2 Hz, 1H), 3.16 – 2.95 (m, 4H), 1.40 (d, *J* = 7.1 Hz, 3H).**13C NMR** (101 MHz, Chloroform-*d*) δ 141.5, 139.9, 133.0, 128.7, 128.5, 128.1, 126.4, 125.1, 122.9, 112.0, 119.9, 118.5, 116.6, 99.9, 50.7, 35.3, 28.9, 24.7.**HRMS(ESI+)** m/z calcd. for C20H19N+ [M+H]+: 274.1590, found: 274.1591.

**4-ethyl-2-phenethyl-4*H*-pyrrolo[3,2,1-*ij*]quinoline (5as)**

Prepared according to **GP3**. White oil (40.1 mg, 70%, 0.2 mmol scale);**1H NMR** (400 MHz, Chloroform-*d*) δ 7.37 (t, *J* = 7.3 Hz, 3H), 7.33 – 7.27 (m, 3H), 6.96 (dd, *J* = 7.9, 7.1 Hz, 1H), 6.81 (d, *J* = 7.0 Hz, 1H), 6.71 (dd, *J* = 9.9, 1.4 Hz, 1H), 6.36 (s, 1H), 5.76 (dd, *J* = 9.9, 4.4 Hz, 1H), 5.23 – 5.17 (m, 1H), 3.22 – 2.98 (m, 4H), 2.06 – 1.94 (m, 1H), 1.74 – 1.61 (m, 1H), 0.74 (t, *J* = 7.5 Hz, 3H).**13C NMR** (101 MHz, Chloroform-*d*) δ 141.6, 139.9, 134.2, 128.7, 128.5, 126.4, 126.0, 124.7, 119.9, 118.8, 116.6, 100.0, 55.5, 35.4, 30.7, 29.0, 7.4.**HRMS(ESI+)** m/z calcd. for C21H21N+ [M+H]+: 288.1747, found: 288.1750.

**4-isobutyl-2-phenethyl-4*H*-pyrrolo[3,2,1-*ij*]quinoline (5at)**

Prepared according to **GP3**. White oil (37.9 mg, 60%, 0.2 mmol scale);**1H NMR** (400 MHz, Chloroform-*d*) δ 7.32 – 7.24 (m, 3H), 7.23 – 7.17 (m, 3H), 6.92 – 6.84 (m, 1H), 6.73 (d, *J* = 7.0 Hz, 1H), 6.61 – 6.55 (m, 1H), 6.27 (s, 1H), 5.82 (dd, *J* = 9.9, 4.5 Hz, 1H), 5.06 – 4.97 (m, 1H), 3.11 – 2.91 (m, 4H), 1.82 – 1.71 (m, 2H), 1.50 – 1.39 (m, 1H), 0.93 (d, *J* = 6.5 Hz, 3H), 0.68 (d, *J* = 6.4 Hz, 3H).**13C NMR** (101 MHz, Chloroform-*d*) δ 141.5, 139.8, 133.7, 128.7, 128.5, 126.6, 126.4, 125.1, 123.9, 119.93, 119.90, 118.7, 116.6, 100.2, 53.4, 48.1, 35.6, 28.9, 23.8, 22.4.**HRMS(ESI+)** m/z calcd. for C23H25N+ [M+H]+: 316.2060, found: 316.2060.

**4-butyl-2-phenethyl-4*H*-pyrrolo[3,2,1-*ij*]quinoline (5au)**

Prepared according to **GP3**. White oil (47.1 mg, 75%, 0.2 mmol scale);**1H NMR** (400 MHz, Chloroform-*d*) δ 7.31 – 7.24 (m, 3H), 7.22 – 7.16 (m, 3H), 6.90 – 6.83 (m, 1H), 6.72 (d, *J* = 7.0 Hz, 1H), 6.59 (dd, *J* = 9.9, 1.4 Hz, 1H), 6.27 (s, 1H), 5.68 (dd, *J* = 9.9, 4.4 Hz, 1H), 5.20 – 4.91 (m, 1H), 3.11 – 2.89 (m, 4H), 1.92 – 1.82 (m, 1H), 1.59 – 1.49 (m, 1H), 1.33 – 1.22 (m, 1H), 1.21 – 1.10 (m, 2H), 0.95 – 0.83 (m, 1H), 0.76 (t, *J* = 7.3 Hz, 3H).**13C NMR** (101 MHz, Chloroform-*d*) δ 141.5, 139.8, 134.0, 128.6, 128.5, 126.5, 126.3, 124.8, 124.3, 119.9, 118.8, 116.6, 100.0, 54.8, 37.8, 35.4, 29.0, 25.1, 22.7, 14.1.**HRMS(ESI+)** m/z calcd. for C23H25N+ [M+H]+: 316.2060, found: 316.2056.

**2-phenethyl-4-(4-(trimethyl-l4-sulfaneyl)but-3-yn-1-yl)-4*H*-pyrrolo[3,2,1-*ij*]quinoline (5av)**

Prepared according to **GP3**. White solid (50.6 mg, 65%, 0.2 mmol scale);**1H NMR** (400 MHz, Chloroform-*d*) δ 7.34 – 7.28 (m, 3H), 7.27 – 7.19 (m, 3H), 6.90 (dd, *J* = 7.9, 7.1 Hz, 1H), 6.76 (d, *J* = 7.0 Hz, 1H), 6.66 (dd, *J* = 9.9, 1.3 Hz, 1H), 6.30 (s, 1H), 5.74 (dd, *J* = 9.9, 4.5 Hz, 1H), 5.26 – 5.20 (m, 1H), 3.15 – 2.95 (m, 4H), 2.36 – 2.24 (m, 1H), 2.13 – 2.04 (m, 1H), 1.90 – 1.78 (m, 2H), 0.09 (s, 9H).**13C NMR** (101 MHz, Chloroform-*d*) δ 141.4, 139.8, 134.0, 128.7, 128.6, 126.4, 125.2, 125.0, 120.2, 120.1, 118.4, 117.0, 106.1, 100.5, 85.3, 53.6, 36.9, 35.4, 28.9, 14.3, 0.2. **HRMS(ESI+)** m/z calcd. for C26H29NSi+ [M+H]+: 384.2142, found: 384.2140.

**2-phenethyl-4-((tetrahydro-2*H*-pyran-4-yl)methyl)-4*H*-pyrrolo[3,2,1-*ij*]quinoline (5aw)**

Prepared according to **GP3**. White oil (40.0 mg, 56%, 0.2 mmol scale);**1H NMR** (400 MHz, Chloroform-*d*) δ 7.31 – 7.25 (m, 3H), 7.23 – 7.15 (m, 3H), 6.88 (t, *J* = 7.5 Hz, 1H), 6.74 (d, *J* = 7.0 Hz, 1H), 6.60 (d, *J* = 10.7 Hz, 1H), 6.27 (s, 1H), 5.80 – 5.73 (q, *J* = 4.5 Hz, 1H), 5.12 – 5.03 (m, 1H), 3.88 (dd, *J* = 11.5, 3.4 Hz, 1H), 3.77 – 3.69 (m, 1H), 3.29 (t, *J* = 11.8 Hz, 1H), 3.21 – 3.12 (m, 1H), 3.11 – 2.89 (m, 4H), 1.88 – 1.76 (m, 1H), 1.74 – 1.60 (m, 2H), 1.54 – 1.45 (m, 1H), 1.35 – 1.20 (m, 1H), 1.16 – 0.98 (m, 2H).;**13C NMR** (101 MHz, Chloroform-*d*) δ 141.3, 139.7, 133.7, 128.7, 128.5, 126.4, 126.1, 125.0, 124.4, 120.1, 120.0, 118.5, 116.8, 100.3, 68.0, 67.9, 52.7, 45.8, 35.4, 33.7, 33.2, 30.5, 29.0. **HRMS(ESI+)** m/z calcd. for C25H27NO+ [M+H]+: 358.2165, found: 358.2159.

**4-(2-(1,3-dioxan-2-yl)ethyl)-2-phenethyl-4*H*-pyrrolo[3,2,1-*ij*]quinoline (5ax)**

Prepared according to **GP3**. White oil (39.3 mg, 53%, 0.2 mmol scale);**1H NMR** (400 MHz, Chloroform-*d*) δ 7.32 (d, *J* = 7.4 Hz, 3H), 7.29 – 7.22 (m, 3H), 6.97 – 6.84 (m, 1H), 6.75 (d, *J* = 7.0 Hz, 1H), 6.66 (dd, *J* = 9.9, 1.3 Hz, 1H), 6.31 (s, 1H), 5.73 (dd, *J* = 9.9, 4.4 Hz, 1H), 5.28 – 5.22 (m, 1H), 4.29 (t, *J* = 4.8 Hz, 1H), 4.05 – 3.95 (m, 2H), 3.78 – 3.52 (m, 2H), 3.20 – 2.94 (m, 4H), 2.16 – 1.88 (m, 2H), 1.82 – 1.60 (m, 2H), 1.35 – 1.19 (m, 3H).**13C NMR** (101 MHz, Chloroform-*d*) δ 141.6, 139.9, 133.9, 128.6, 128.5, 126.3, 125.8, 124.9, 124.8, 119.9, 118.6, 116.8, 101.7, 100.1, 66.9, 54.1, 35.4, 31.8, 28.9, 28.7, 25.8. **HRMS(ESI+)** m/z calcd. for C25H27NO2 + [M+H]+: 374.2115, found: 374.2106.

**4-octyl-2-phenethyl-4*H*-pyrrolo[3,2,1-*ij*]quinoline (5ay)**

Prepared according to **GP3**. White oil (53.0 mg, 71%, 0.2 mmol scale);**1H NMR** (400 MHz, Chloroform-*d*) δ 7.36 – 7.28 (m, 3H), 7.27 – 7.22 (m, 3H), 6.94 – 6.86 (m, 1H), 6.75 (d, *J* = 7.0 Hz, 1H), 6.63 (dd, *J* = 9.9, 1.4 Hz, 1H), 6.30 (s, 1H), 5.74 (dd, *J* = 9.9, 4.4 Hz, 1H), 5.18 – 5.10 (m, 1H), 3.18 – 2.93 (m, 4H), 1.96 – 1.85 (m, 1H), 1.64 – 1.54 (m, 1H), 1.36 – 1.29 (m, 1H), 1.27 – 1.10 (m, 11H), 1.01 – 0.90 (m, 1H), 0.84 (t, *J* = 7.0 Hz, 3H). **13C NMR** (101 MHz, Chloroform-*d*) δ 141.6, 139.9, 134.0, 128.7, 128.5, 126.5, 126.4, 124.8, 124.3, 119.9, 118.8, 116.6, 100.0, 54.8, 38.2, 35.4, 31.9, 29.6, 29.5, 29.3, 29.0, 23.1, 22.8, 14.2.**HRMS(ESI+)** m/z calcd. for C27H33N+ [M+H]+: 372.2686, found: 372.2677.

**2,4-diphenethyl-4*H*-pyrrolo[3,2,1-*ij*]quinoline (5az)**

Prepared according to **GP3**. White oil (43.0 mg, 59%, 0.2 mmol scale); **1H NMR** (400 MHz, Chloroform-*d*) δ 7.44 (d, *J* = 7.9 Hz, 1H), 7.41 – 7.36 (m, 2H), 7.32 – 7.26 (m, 5H), 7.25 – 7.19 (m, 1H), 7.12 (d, *J* = 7.1 Hz, 2H), 7.06–6.99 (m, 1H), 6.88 (d, *J* = 7.0 Hz, 1H), 6.79 (dd, *J* = 9.9, 1.3 Hz, 1H), 6.41 (s, 1H), 5.88 (dd, *J* = 9.9, 4.4 Hz, 1H), 5.29 – 5.20 (m, 1H), 3.22 – 2.97 (m, 4H), 2.79 – 2.69 (m, 1H), 2.38 – 2.26 (m, 2H), 2.04 – 1.92 (m, 1H).**13C NMR** (101 MHz, Chloroform-*d*) δ 141.5, 141.2, 139.8, 134.1, 128.6, 128.5, 128.4, 126.3, 126.0, 125.8, 124.87, 124.85, 120.1, 120.0, 118.6, 116.8, 100.3, 54.12, 39.8, 35.4, 29.4, 28.9. **HRMS(ESI+)** m/z calcd. for C27H25N+ [M+H]+: 364.2060, found: 364.2052.

**4-cyclopropyl-2-phenethyl-4*H*-pyrrolo[3,2,1-*ij*]quinoline (5aaa)**

Prepared according to **GP3**. White oil (48.6 mg, 81%, 0.2 mmol scale);**1H NMR** (400 MHz, Chloroform-*d*) δ 7.32 (dd, *J* = 17.4, 7.6 Hz, 3H), 7.26 – 7.18 (m, 3H), 6.96 – 6.88 (m, 1H), 6.77 (d, *J* = 7.0 Hz, 1H), 6.61 (d, *J* = 11.2 Hz, 1H), 6.32 (s, 1H), 5.69 (dd, *J* = 9.9, 4.5 Hz, 1H), 4.84 – 4.75 (m, 1H), 3.28 – 3.15 (m, 1H), 3.15 – 3.00 (m, 3H), 1.22 – 1.11 (m, 1H), 0.62 – 0.52 (m, 1H), 0.52 – 0.36 (m, 2H), 0.33 – 0.25 (m, 1H).**13C NMR** (101 MHz, Chloroform-*d*) δ 141.6, 140.7, 133.5, 128.6, 128.5, 126.3, 125.0, 124.7, 124.0, 119.9, 118.5, 116.7, 100.1, 56.9, 35.1, 29.3, 18.7, 5.3, 1.2.**HRMS(ESI+)** m/z calcd. for C22H21N+ [M+H]+: 300.1747, found: 300.1740.

**2-phenethyl-4-(phenylethynyl)-4*H*-pyrrolo[3,2,1-*ij*]quinoline (5aab)**

Prepared according to **GP3**. Brown solid (38.9 mg, 54%, 0.2 mmol scale); **1H NMR** (400 MHz, Chloroform-*d*) δ 7.36 – 7.30 (m, 3H), 7.27 – 7.17 (m, 8H), 6.95 – 6.89 (m, 1H), 6.80 (d, *J* = 7.0 Hz, 1H), 6.64 (dd, *J* = 9.7, 1.9 Hz, 1H), 6.28 (s, 1H), 6.04 (dd, *J* = 3.9, 1.7 Hz, 1H), 5.81 (dd, *J* = 9.7, 4.1 Hz, 1H), 3.36 – 3.24 (m, 1H), 3.21 – 3.01 (m, 3H).**13C NMR** (101 MHz, Chloroform-*d*) δ 141.5, 140.5, 132.7, 131.8, 128.8, 128.60, 128.57, 128.4, 126.3, 125.1, 124.0, 122.4, 122.3, 120.6, 120.3, 117.4, 117.2, 100.5, 86.6, 85.0, 46.6, 35.01, 28.6.**HRMS(ESI+)** m/z calcd. for C27H21N+ [M+H]+: 360.1747, found: 360.1753.

**2-phenethyl-4-(4-phenylbut-1-yn-1-yl)-4*H*-pyrrolo[3,2,1-*ij*]quinoline (5aac)**

Prepared according to **GP3**. White solid (53.2 mg, 69%, 0.2 mmol scale);**1H NMR** (400 MHz, Chloroform-*d*) δ 7.34 – 7.24 (m, 3H), 7.22 – 7.12 (m, 6H), 7.09 – 7.03 (m, 2H), 6.92 – 6.87 (m, 1H), 6.76 (d, *J* = 7.0 Hz, 1H), 6.56 (dd, *J* = 9.6, 1.8 Hz, 1H), 6.24 (s, 1H), 5.75 – 5.71 (m, 1H), 5.68 (dd, *J* = 9.6, 4.1 Hz, 1H), 3.19 – 2.94 (m, 4H), 2.70 (t, *J* = 7.5 Hz, 2H), 2.41 (td, *J* = 7.5, 1.9 Hz, 2H).**13C NMR** (101 MHz, Chloroform-*d*) δ 141.6, 140.49, 140.45, 132.7, 128.60, 128.56, 128.53, 128.48, 126.4, 126.3, 125.1, 123.4, 123.1, 120.4, 120.2, 117.3, 117.3, 100.2, 85.2, 78.9, 46.1, 35.0, 34.8, 28.5, 21.0.**HRMS(ESI+)** m/z calcd. for C29H25N+ [M+H]+: 388.2060, found: 388.2059.

**4-(cyclohex-1-en-1-ylethynyl)-2-phenethyl-4*H*-pyrrolo[3,2,1-*ij*]quinoline (5aad)**

Prepared according to **GP3**. White solid (52.7 mg, 73%, 0.2 mmol scale);**1H NMR** (400 MHz, Chloroform-*d*) δ 7.34 – 7.23 (m, 5H), 7.23 – 7.17 (m, 1H), 6.92 – 6.87 (m, 1H), 6.77 (d, *J* = 7.0 Hz, 1H), 6.58 (dd, *J* = 9.7, 1.9 Hz, 1H), 6.25 (s, 1H), 6.03 (dt, *J* = 3.8, 2.0 Hz, 1H), 5.95 (dd, *J* = 3.8, 1.7 Hz, 1H), 5.74 (dd, *J* = 9.7, 4.0 Hz, 1H), 3.31 – 3.21 (m, 1H), 3.17 – 3.00 (m, 3H), 2.05 – 1.96 (m, 4H), 1.60 – 1.46 (m, 4H).**13C NMR** (101 MHz, Chloroform-*d*) δ 141.6, 140.5, 136.1, 132.7, 128.6, 126.2, 125.0, 123.6, 122.9, 120.4, 120.1, 120.0, 117.3, 117.2, 100.3, 86.8, 84.0, 46.6, 35.1, 29.1, 28.6, 25.7, 22.3, 21.5. **HRMS(ESI+)** m/z calcd. for C27H25N+ [M+H]+: 364.2060, found: 364.2066.

**2-phenethyl-4-(prop-1-yn-1-yl)-4*H*-pyrrolo[3,2,1-*ij*]quinoline (5aae)**

Prepared according to **GP3**. White oil (36.4 mg, 61%, 0.2 mmol scale);**1H NMR** (400 MHz, Chloroform-*d*) δ 7.44 – 7.27 (m, 6H), 7.03 – 6.96 (m, 1H), 6.86 (d, *J* = 7.0 Hz, 1H), 6.66 (dd, *J* = 9.4, 1.5 Hz, 1H), 6.35 (s, 1H), 5.87 – 5.78 (m, 2H), 3.39 – 3.27 (m, 1H), 3.26 – 3.08 (m, 3H), 1.85 (d, *J* = 2.1 Hz, 3H).**13C NMR** (101 MHz, Chloroform-*d*) δ 141.6, 140.4, 132.7, 128.6, 128.5, 126.3, 125.0, 123.4, 123.2, 120.4, 120.2, 117.2, 100.2, 81.5, 77.3, 46.1, 35.1, 28.5, 3.7.**HRMS(ESI+)** m/z calcd. for C22H19N+ [M+H]+: 298.1590, found: 298.1591.

**4-(2-methylprop-1-en-1-yl)-2-phenethyl-4*H*-pyrrolo[3,2,1-*ij*]quinoline (5aaf)**

Prepared according to **GP3**. White oil (38.2 mg, 61%, 0.2 mmol scale);**1H NMR** (400 MHz, Chloroform-*d*) δ 7.33 (dd, *J* = 13.1, 7.8 Hz, 3H), 7.25 – 7.19 (m, 3H), 6.93 (t, *J* = 7.9 Hz, 1H), 6.77 (d, *J* = 7.0 Hz, 1H), 6.55 (dd, *J* = 9.8, 1.7 Hz, 1H), 6.27 (s, 1H), 5.77 (dd, *J* = 8.8, 4.1 Hz, 1H), 5.59 (dd, *J* = 9.8, 4.2 Hz, 1H), 5.29 (d, *J* = 11.0 Hz, 1H), 3.07 – 2.89 (m, 4H), 1.78 (s, 3H), 1.73 (s, 3H).**13C NMR** (101 MHz, Chloroform-*d*) δ 141.6, 140.5, 133.1, 131.8, 128.6, 128.4, 126.2, 125.7, 125.6, 125.0, 122.5, 119.93, 119.90, 118.2, 116.5, 99.7, 54.0, 35.4, 28.4, 25.6, 18.2.**HRMS(ESI+)** m/z calcd. for C23H23N+ [M+H]+: 314.1903, found: 314.1897.

**2-phenethyl-4-vinyl-4*H*-pyrrolo[3,2,1-*ij*]quinoline (5aag)**

Prepared according to **GP3**. White oil (28.3 mg, 50%, 0.2 mmol scale);**1H NMR** (400 MHz, Chloroform-*d*) δ 7.34 – 7.25 (m, 3H), 7.24 – 7.14 (m, 3H), 6.94 – 6.86 (m, 1H), 6.75 (d, *J* = 7.0 Hz, 1H), 6.54 (dd, *J* = 9.8, 1.6 Hz, 1H), 6.26 (s, 1H), 5.86 (ddd, *J* = 17.0, 10.1, 7.0 Hz, 1H), 5.64 (dd, *J* = 9.8, 4.3 Hz, 1H), 5.53 – 5.44 (m, 1H), 5.03 (d, *J* = 10.1 Hz, 1H), 4.93 (d, *J* = 17.1 Hz, 1H), 3.06 – 2.96 (m, 3H), 2.97 – 2.87 (m, 1H).**13C NMR** (101 MHz, Chloroform-*d*) δ 141.6, 140.8, 137.9, 133.2, 128.6, 128.5, 126.3, 125.3, 125.0, 123.4, 120.12, 120.10, 118.2, 116.9, 114.8, 100.0, 58.3, 35.1, 28.7. **HRMS(ESI+)** m/z calcd. for C21H19N+ [M+H]+: 286.1590, found: 286.1593.

**4-(4-(4-fluorophenyl)-8-methoxy-4*H*-pyrrolo[3,2,1-*ij*]quinolin-2-yl)butanenitrile (5aah)**

Prepared according toaforementioned method. White solid (1481.0 mg, 71%, 6 mmol scale);**1H NMR** (400 MHz, Chloroform-*d*) δ 7.05 – 6.96 (m, 4H), 6.88 (d, *J* = 2.1 Hz, 1H), 6.60–6.56 (m, 1H), 6.52 (dd, *J* = 9.8, 1.8 Hz, 1H), 6.19 (s, 1H), 6.15 – 6.12 (m, 1H), 5.83 (dd, *J* = 9.8, 4.2 Hz, 1H), 3.85 (s, 3H), 2.63 – 2.54 (m, 1H), 2.46 – 2.17 (m, 3H), 1.88 – 1.69 (m, 2H).**13C NMR** (101 MHz, Chloroform-*d*) δ 162.5 (d, *J*C-F = 247.2 Hz), 155.3, 139.0 (d, *J*C-F = 3.1 Hz), 138.1, 129.0, 128.2, 127.6 (d, *J*C-F = 8.2 Hz), 124.6, 121.4, 119.3, 118.5, 116.3 (d, *J*C-F = 21.7 Hz), 108.6, 102.1, 100.7, 59.1, 56.2, 25.5, 24.2, 16.5.**19F NMR** (376 MHz, Chloroform-*d*) δ -115.1. **HRMS(ESI+)** m/z calcd. for C22H19FN2O+ [M+Na]+: 369.1374, found: 369.1376.

**2-(tert-butyl)-4-phenyl-4*H*-pyrrolo[3,2,1-*ij*]quinoline (5aai)**

Prepared according to **GP3**. White oil (17.8 mg, 31%, 0.2 mmol scale);**1H** **NMR** (400 MHz, Chloroform-*d*) δ 7.45 (d, *J* = 7.9 Hz, 1H), 7.27 – 7.18 (m, 3H), 7.01 (t, *J* = 7.5 Hz, 1H), 6.84 (d, *J* = 7.1 Hz, 1H), 6.74 (d, *J* = 7.8 Hz, 2H), 6.52 (d, *J* = 9.6 Hz, 1H), 6.46 (s, 1H), 6.36 (d, *J* = 5.1 Hz, 1H), 5.99 (dd, *J* = 9.6, 5.2 Hz, 1H), 1.22 (s, 9H).**13C NMR** (101 MHz, Chloroform-*d*) δ 150.2, 145.5, 135.9, 129.2, 127.7, 127.6, 124.6, 124.3, 121.4, 120.2, 120.1, 119.1, 117.4, 101.2, 60.9, 33.0, 31.1. **HRMS(ESI+)** m/z calcd. for C21H21N+ [M+H]+: 288.1747, found: 288.1748.

**allyl 3-phenyl-1*H*-1,2-diazepine-1-carboxylate (6)**

Prepared according to literature.[15] Yellow oil (14.8 mg, 29%, 0.2 mmol scale); **1H NMR** (400 MHz, Chloroform-*d*) δ 7.77 – 7.71 (m, 2H), 7.49 – 7.37 (m, 3H), 6.85 (d, *J* = 11.4 Hz, 1H), 6.76 (dd, *J* = 11.4, 5.1 Hz, 1H), 6.45 (d, *J* = 7.1 Hz, 1H), 6.09 – 5.98 (m, 1H), 5.88 – 5.82 (m, 1H), 5.47 – 5.36 (m, 1H), 5.32 – 5.23 (m, 1H), 4.79 (dt, *J* = 5.6, 1.4 Hz, 2H). **13C NMR** (101 MHz, Chloroform-*d*) δ 168.0, 139.6, 135.4, 135.1, 132.3, 131.3, 130.8, 128.6, 128.5, 120.3, 118.4, 67.2. **HRMS**(ESI+) m/z calcd. for C15H14N2O2+ [M+H]+: 255.1128, found: 255.1130.

**2,6-dibromo-4-(2-ethylbenzofuran-3-carbonyl)phenyl 5-oxohexanoate-6-d (7)**

Prepared according toaforementioned method. Yellow oil (53.8 mg, 50%, >98%D, 0.2 mmol scale); **1H NMR** (400 MHz, Chloroform-*d*) δ 8.02 (s, 2H), 7.50 (d, J = 8.1 Hz, 1H), 7.40 (d, *J* = 8.3 Hz, 1H), 7.32 (t, *J* = 8.3 Hz, 1H), 7.28 – 7.22 (m, 1H), 2.91 (q, *J* = 7.5 Hz, 2H), 2.76 (t, *J* = 7.2 Hz, 2H), 2.67 (t, *J* = 7.1 Hz, 2H), 2.16 (t, *J* = 2.1 Hz, 2H), 2.10 (p, *J* = 7.1 Hz, 2H), 1.37 (d, *J* = 7.5 Hz, 3H).**13C NMR** (101 MHz, Chloroform-*d*) δ 207.8, 188.0, 169.2, 167.5, 153.9, 149.6, 139.1, 133.2, 126.4, 125.0, 124.2, 121.2, 118.3, 115.4, 111.3, 42.3, 32.9, 30.0 (t, *J*C-D = 19.7 Hz), 22.2, 18.9, 12.3.**HRMS**(ESI+) m/z calcd. for C23H19DBr2O5+ [M+Na]+: 557.9632, found: 557.9601.

**4-oxopentyl-5-*d* 2-(1-(4-chlorobenzoyl)-5-methoxy-2-methyl-1*H*-indol-3-yl)acetate (8)**

Prepared according toaforementioned method. Yellow oil (55.1 mg, 62%, >98%D, 0.2 mmol scale); **1H NMR** (400 MHz, Chloroform-*d*) δ 7.66 (d, *J* = 8.4 Hz, 2H), 7.47 (d, *J* = 8.4 Hz, 2H), 6.96 (d, *J* = 2.5 Hz, 1H), 6.88 (d, *J* = 9.0 Hz, 1H), 6.67 (dd, *J* = 9.0, 2.5 Hz, 1H), 4.10 (t, J = 6.4 Hz, 2H), 3.83 (s, 3H), 3.65 (s, 2H), 2.43 – 2.36 (m, 5H), 2.05 (t, *J* = 2.1 Hz, 2H), 1.88 (p, *J* = 6.8 Hz, 2H). **13C NMR** (101 MHz, Chloroform-*d*) δ 207.7, 170.9, 168.4, 156.2, 139.4, 136.1, 134.0, 131.3, 131.0, 130.7, 129.3, 115.1, 112.7, 111.7, 101.5, 64.3, 55.8 39.8, 30.5, 29.6 (t, *J*C-D = 19.8Hz), 22.8, 13.5. **HRMS**(ESI+) m/z calcd. for C24H23DClNO5+ [M+Na]+: 465.1298, found: 465.1299.

**(8*R*,9*S*,13*S*,14*S*)-13-methyl-17-oxo-7,8,9,11,12,13,14,15,16,17-decahydro-6*H*-cyclopenta[*a*]phenanthren-3-yl 5-oxohexanoate-6-*d* (9)**

Prepared according toaforementioned method. White sold (42.0 mg, 55%, >95%D, 0.2 mmol scale); **1H NMR** (400 MHz, Chloroform-*d*) δ 7.28 (d, *J* = 8.5 Hz, 1H), 6.84 (dd, *J* = 8.4, 2.5 Hz, 1H), 6.80 (d, *J* = 2.4 Hz, 1H), 2.94 – 2.87 (m, 2H), 2.62 – 2.56 (m, 4H), 2.51 (dd, *J* = 18.8, 8.6 Hz, 1H), 2.45 – 2.37 (m, 1H), 2.34 – 2.24 (m, 1H), 2.20 – 1.92 (m, 8H), 1.69 – 1.61 (m, 1H), 1.48 (m, 5H), 0.91 (s, 3H). **13C NMR** (101 MHz, Chloroform-*d*) δ 221.2, 208.2, 172.2, 148.6, 138.2, 137.5, 126.6, 121.7, 118.9, 50.5, 48.1, 44.3, 42.5, 38.1, 36.0, 33.4, 31.7, 29.9 (t, *J*C-D = 19.5 Hz), 29.5, 26.5, 25.9, 21.7, 18.9, 14.0. **HRMS**(ESI+) m/z calcd. for C24H29DO4+ [M+Na]+: 406.2099, found: 406.2100.

**4-oxopentyl-5-*d* 2-(11-oxo-6,11-dihydrodibenzo[*b*,*e*]oxepin-2-yl)acetate (10)**

Prepared according toaforementioned method. Colorless oil (39.6 mg, 56%, >98%D, 0.2 mmol scale);**1H NMR** (400 MHz, Chloroform-*d*) δ 8.11 (d, *J* = 2.4 Hz, 1H), 7.88 (dd, *J* = 7.7, 1.2 Hz, 1H), 7.56 (td, *J* = 7.5, 1.4 Hz, 1H), 7.47 (td, *J* = 7.6, 1.2 Hz, 1H), 7.42 (dd, *J* = 8.4, 2.4 Hz, 1H), 7.37 (d, *J* = 7.4 Hz, 1H), 7.03 (d, *J* = 8.4 Hz, 1H), 5.19 (s, 2H), 4.11 (t, *J* = 6.3 Hz, 2H), 3.63 (s, 2H), 2.49 (t, *J* = 7.2 Hz, 2H), 2.12(t, *J* = 2.2 Hz 2H), 1.91 (p, *J* = 6.7 Hz, 2H).**13C NMR** (101 MHz, Chloroform-*d*) δ 207.9, 191.0, 171.5, 160.6, 140.5, 136.5, 135.7, 133.0, 132.5, 129.6, 129.4, 128.0, 127.9, 125.3, 121.2, 73.8, 64.2, 40.4, 39.9, 29.1 (t,*J*C-D = 19.6 Hz), 22.8. **HRMS**(ESI+) m/z calcd. for C21H19DO5+ [M+Na]+: 376.1266, found: 376.1269.

**4-oxopentyl-5-*d* 2-(4-(4-chlorobenzoyl)phenoxy)-2-methylpropanoate (11)**

Prepared according toaforementioned method. Colorless oil (52.3 mg, 65%, >98%D, 0.2 mmol scale); **1H NMR** (400 MHz, Chloroform-*d*) δ 7.73 (d, *J* = 8.8 Hz, 2H), 7.69 (d, *J* = 8.4 Hz, 2H), 7.44 (d, *J* = 8.4 Hz, 2H), 6.85 (d, *J* = 8.8 Hz, 2H), 4.15 (t, *J* = 6.3 Hz, 2H), 2.29 (t, *J* = 7.2 Hz, 2H), 2.01 (t, *J* = 2.2 Hz, 2H), 1.85 (p, *J* = 6.7 Hz, 2H), 1.67 (s, 6H). **13C NMR** (101 MHz, Chloroform-*d*) δ 207.4, 194.3, 173.8, 159.8, 138.6, 136.4, 132.2, 131.3, 130.5, 128.7, 117.2, 79.5, 65.0, 39.5, 29.8 (t, *J*C-D = 19.6 Hz), 25.6, 22.6. **HRMS**(ESI+) m/z calcd. for C22H22DClO5+ [M+Na]+: 426.1189, found: 426.1189.

**4-oxopentyl-5-*d* 2-(4-(2,2-dichlorocyclopropyl)phenoxy)-2-methylpropanoate (12)**

Prepared according toaforementioned method. Colorless oil (53.0 mg, 71%, >98%D, 0.2 mmol scale); **1H NMR** (400 MHz, Chloroform-*d*) δ 7.11 (d, *J* = 8.5 Hz, 2H), 6.78 (d, *J* = 8.7 Hz, 2H), 4.14 (t, *J* = 6.3 Hz, 2H), 2.81 (dd, *J* = 10.6, 8.4 Hz, 1H), 2.29 (t, *J* = 7.2 Hz, 2H), 2.02 (t, *J* = 2.2 Hz, 2H), 1.94 (dd, *J* = 10.7, 7.4 Hz, 1H), 1.85 (p, *J* = 6.7 Hz, 2H), 1.77 (dd, *J* = 8.2, 7.5 Hz, 1H), 1.60 (s, 6H). **13C NMR** (101 MHz, Chloroform-*d*) δ 207.7, 174.3, 155.2, 129.8, 128.1, 118.2, 79.2, 64.7, 61.0, 39.6, 34.9, 29.8 (t, *J*C-D = 19.9 Hz), 26.0, 25.5, 22.5. **HRMS**(ESI+) m/z calcd. for C18H21DCl2O4+ [M+Na]+: 396.0850, found: 396.0850.

**4-(4-(4-fluorophenyl)-8-methoxy-4*H*-pyrrolo[3,2,1-*ij*]quinolin-2-yl)butanamide (13)**

Prepared according toaforementioned method. White solid (69.4 mg, 95%, 0.2 mmol scale);**1H NMR** (400 MHz, DMSO-*d*6) δ 7.23 (s, 1H), 7.14 (t, *J* = 8.5 Hz, 2H), 7.04 – 6.96 (m, 2H), 6.84 (s, 1H), 6.74 (s, 1H), 6.58 – 6.50 (m, 2H), 6.34 (d, *J* = 4.2 Hz, 1H), 6.15 (s, 1H), 5.95 (dd, *J* = 9.7, 4.3 Hz, 1H), 3.74 (s, 3H), 2.44 – 2.34 (m, 1H), 2.23 – 2.12 (m, 1H), 2.00 (t, *J* = 6.9 Hz, 2H), 1.80 – 1.54 (m, 2H).**13C NMR** (101 MHz, DMSO-*d*6) δ 173.8, 161.5 (d, *J*C-F = 243.6 Hz), 154.5, 140.6, 139.4 (d, *J*C-F = 2.7 Hz), 129.1, 128.3, 127.6 (d, *J*C-F = 8.3 Hz), 124.3, 120.6, 118.1, 115.8 (d, *J*C-F = 21.6 Hz), 106.7, 101.8, 99.7, 57.4, 55.5, 34.4, 25.6, 23.8. **19F NMR** (376 MHz, DMSO-*d*6) δ -114.5. **HRMS(ESI+)** m/z calcd. for C22H21FN2O2 + [M+Na]+: 387.1479, found: 387.1479.

**4-(1-bromo-4-(4-fluorophenyl)-8-methoxy-4*H*-pyrrolo[3,2,1-*ij*]quinolin-2-yl)butanenitrile (14)**

Prepared according toaforementioned method. White solid (52.1 mg, 62%, 0.2 mmol scale);**1H NMR** (400 MHz, Chloroform-*d*) δ 7.10–6.98 (m, 4H), 6.77 (d, *J* = 2.1 Hz, 1H), 6.61 (d, *J* = 2.1 Hz, 1H), 6.52 (dd, *J* = 9.9, 1.8 Hz, 1H), 6.13 (dd, *J* = 4.1, 1.6 Hz, 1H), 5.84 (dd, *J* = 9.9, 4.2 Hz, 1H), 3.87 (s, 3H), 2.71 – 2.51 (m, 2H), 2.31 – 2.20 (m, 2H), 1.85 – 1.72 (m, 1H), 1.39 – 1.25 (m, 1H).**13C NMR** (101 MHz, Chloroform-*d*) δ 162.7 (d, *J*C-F = 247.9 Hz), 155.9, 138.5 (d, *J*C-F = 3.1 Hz), 134.7, 128.6, 127.9 (d, *J*C-F = 8.2 Hz), 127.6, 124.0, 121.0, 119.3, 118.9, 116.5 (d, *J*C-F = 21.7 Hz), 109.7, 99.7, 91.8, 59.3, 56.1, 24.4, 24.1, 16.8.**19F NMR** (376 MHz, Chloroform-*d*) δ -114.3. **HRMS(ESI+)** m/z calcd. for C22H18BrFN2O+ [M+Na]+: 447.0479, found: 447.0471.

**4-(4-(4-fluorophenyl)-8-methoxy-1-thiocyanato-4*H*-pyrrolo[3,2,1-*ij*]quinolin-2-yl)butanenitrile (15)**

Prepared according toaforementioned method. White solid (54.8 mg, 68%, 0.2 mmol scale); **1H NMR** (400 MHz, Chloroform-*d*) δ 7.15 – 7.08 (m, 2H), 7.07 – 7.01 (m, 2H), 6.97 (d, *J* = 2.0 Hz, 1H), 6.68 (d, *J* = 2.0 Hz, 1H), 6.56 (dd, *J* = 9.9, 1.6 Hz, 1H), 6.16 (d, *J* = 2.6 Hz, 1H), 5.87 (dd, *J* = 9.9, 4.1 Hz, 1H), 3.91 (s, 3H), 2.90 – 2.68 (m, 2H), 2.39 – 2.25 (m, 2H), 1.91 – 1.78 (m, 1H), 1.43 – 1.28 (m, 1H).**13C NMR** (101 MHz, Chloroform-*d*) δ 162.8 (d, *J*C-F = 248.6 Hz), 156.9, 143.6, 137.7 (d, *J*C-F = 3.1 Hz), 128.4, 128.0 (d, *J*C-F = 8.3 Hz), 127.8, 125.9, 120.9, 119.3, 119.0, 116.7 (d, *J*C-F = 21.8 Hz), 111.6, 110.4, 99.5, 90.6, 59.6, 56.1, 24.4, 17.1.**19F NMR** (376 MHz, Chloroform-*d*) δ -113.7.**HRMS(ESI+)** m/z calcd. for C23H18FN3OS+ [M+Na]+: 426.1047 found: 426.1055.

**3-(4-phenyl-4*H*-pyrrolo[3,2,1-*ij*]quinolin-1-yl)propyl 2-(4-(4-chlorobenzoyl)phenoxy)-2-methyl**

**propanoate (16)**

Prepared according to **GP3**. White oil (96.2 mg, 82%, 0.2 mmol scale);**1H NMR** (400 MHz, Chloroform-*d*) δ 7.71 (d, *J* = 8.7 Hz, 2H), 7.61 (d, *J* = 8.4 Hz, 2H), 7.37 – 7.34 (m, 3H), 7.25 – 7.17 (m, 3H), 6.99 – 6.92 (m, 3H), 6.84 – 6.78 (m, 3H), 6.50 (dd, *J* = 9.8, 1.7 Hz, 1H), 6.15 (s, 1H), 6.02 (d, *J* = 4.0 Hz, 1H), 5.74 (dd, *J* = 9.8, 4.2 Hz, 1H), 4.18 – 3.99 (m, 2H), 2.39 – 2.27 (m, 1H), 2.22 – 2.12 (m, 1H), 1.85 – 1.56 (m, 3H), 1.62 (d, *J* = 3.7 Hz, 6H).**13C NMR** (101 MHz, Chloroform-*d*) δ 192.6, 172.1, 158.1, 141.6, 137.5, 136.8, 134.7, 132.1, 130.5, 129.5, 128.8, 127.6, 127.0, 126.4, 125.6, 124.1, 123.0, 119.9, 118.6, 118.5, 116.3, 115.5, 98.6, 77.8, 63.3, 58.1, 25.3, 24.0, 23.7, 21.4. **HRMS(ESI+)** m/z calcd. for C37H32ClNO4 + [M+Na]+: 612.1912, found: 612.1913.

**3-(4-phenyl-4*H*-pyrrolo[3,2,1-*ij*]quinolin-2-yl)propyl 2-(11-oxo-6,11-dihydrodibenzo[b,e]oxepin-2-yl)**

**acetate (17)**

Prepared according to **GP3**. White oil (46.7 mg, 43%, 0.2 mmol scale);**1H NMR** (400 MHz, Chloroform-*d*) δ 8.11 (d, *J* = 2.2 Hz, 1H), 7.87 (d, *J* = 7.7 Hz, 1H), 7.55 (t, *J* = 7.9 Hz, 1H), 7.45 (t, *J* = 7.5 Hz, 1H), 7.40 – 7.34 (m, 3H), 7.30 – 7.27 (m, 1H), 7.27 – 7.22 (m, 2H), 7.04 – 6.99 (m, 3H), 6.96 (t, *J* = 7.5 Hz, 1H), 6.82 (d, *J* = 7.0 Hz, 1H), 6.53 (dd, *J* = 9.8, 1.6 Hz, 1H), 6.21 (s, 1H), 6.16 – 6.11 (m, 1H), 5.78 (dd, *J* = 9.8, 4.2 Hz, 1H), 5.17 (s, 2H), 4.10 – 3.96 (m, 2H), 3.56 (s, 2H), 2.51 – 2.41 (m, 1H), 2.34 – 2.23 (m, 1H), 1.91 – 1.69 (m, 2H).**13C NMR** (101 MHz, Chloroform-*d*) δ 191.0, 171.4, 160.6, 143.4, 140.6, 139.6, 136.5, 135.7, 133.8, 132.9, 132.6, 129.6, 129.4, 129.3, 128.1, 128.0, 127.3, 125.9, 125.3, 124.8, 121.6, 121.2, 120.2, 118.0, 117.1, 100.3, 73.8, 64.3, 59.8, 40.3, 27.2, 23.2.**HRMS(ESI+)** m/z calcd. for C36H29NO4 + [M+Na]+: 562.1989, found: 562.1987.

**3-(4-phenyl-4*H*-pyrrolo[3,2,1-*ij*]quinolin-1-yl)propyl 2-(4-(2,2-dichlorocyclopropyl)phenoxy)-2-methyl**

**propanoate (18)**

Prepared according to **GP3**. White oil (74.7 mg, 67%, 0.2 mmol scale);**1H NMR** (400 MHz, Chloroform-*d*) δ 7.36 (d, *J* = 8.0 Hz, 1H), 7.28 – 7.18 (m, 3H), 7.05 (dd, *J* = 8.7, 3.0 Hz, 2H), 7.00 – 6.93 (m, 3H), 6.81 (d, *J* = 7.0 Hz, 1H), 6.76 (d, *J* = 8.5 Hz, 2H), 6.54 – 6.50 (m, 1H), 6.16 (s, 1H), 6.02 (dd, *J* = 9.3, 4.0 Hz, 1H), 5.75 (dd, *J* = 9.8, 4.2 Hz, 1H), 4.17 – 4.08 (m, 1H), 4.06 – 3.98 (m, 1H), 2.79 – 2.70 (m, 1H), 2.39 – 2.28 (m, 1H), 2.23 – 2.13 (m, 1H), 1.91 – 1.64 (m, 4H), 1.55 (s, 3H), 1.54 (s, 3H).**13C NMR** (101 MHz, Chloroform-*d*) δ 174.2, 155.1, 143.28, 143.26, 139.4, 133.8, 129.8, 129.2, 128.23, 128.21, 128.0, 127.3, 125.9, 124.7, 121.6, 120.2, 118.51, 118.45, 118.0, 117.1, 100.3, 100.2, 79.2, 64.6, 61.00, 60.98, 59.7, 34.9, 27.1, 27.0, 25.89, 25.85, 25.8, 25.3, 25.1, 23.1.**HRMS(ESI+)** m/z calcd. for C33H31Cl2NO3 + [M+Na]+: 582.1573, found: 582.1575.

**2,6-dibromo-4-(2-ethylbenzofuran-3-carbonyl)phenyl 4-(4-phenyl-4*H*-pyrrolo[3,2,1-*ij*]quinolin-2-yl)**

**butanoate (19)**

Prepared according to **GP3**. White solid (79.6 mg, 55%, 0.2 mmol scale); **1H NMR** (400 MHz, Chloroform-*d*) δ 8.02 (s, 2H), 7.51 (d, *J* = 8.1 Hz, 1H), 7.41 (d, *J* = 7.8 Hz, 2H), 7.35 – 7.21 (m, 6H), 7.05 (d, *J* = 6.7 Hz, 2H), 7.02 – 6.96 (m, 1H), 6.85 (d, *J* = 7.0 Hz, 1H), 6.55 (dd, *J* = 9.8, 1.7 Hz, 1H), 6.33 (s, 1H), 6.20 (d, *J* = 4.0 Hz, 1H), 5.81 (dd, *J* = 9.8, 4.2 Hz, 1H), 2.92 (q, *J* = 7.5 Hz, 2H), 2.73 – 2.57 (m, 3H), 2.49 – 2.39(m, 1H), 2.11 – 1.92 (m, 2H), 1.37 (t, *J* = 7.5 Hz, 3H).**13C NMR** (101 MHz, Chloroform-*d*) δ 187.9, 169.2, 167.5, 153.8, 149.6, 143.4, 139.4, 139.0, 133.9, 133.1, 129.3, 128.1, 127.4, 126.4, 125.9, 124.9, 124.8, 124.1, 121.6, 121.1, 120.3, 120.2, 118.3, 118.1, 117.2, 115.3, 111.3, 100.7, 59.8, 33.1, 26.0, 23.3, 22.2, 12.3. **HRMS(ESI+)** m/z calcd. for C38H29Br2NO4 + [M+Na]+: 744.0356, found: 744.0350.

**(5a*R*,8a*R*,9*R*)-8-oxo-9-(3,4,5-trimethoxyphenyl)-5,5a,6,8,8a,9-hexahydrofuro[3',4':6,7]naphtho[2,3-*d*][1,3]dioxol-5-yl 4-(4-phenyl-4*H*-pyrrolo[3,2,1-*ij*]quinolin-2-yl)butanoate (20)**

Prepared according to **GP3**. White solid (90.3 mg, 63%, 0.2 mmol scale);**1H NMR** (400 MHz, Chloroform-*d*) δ 7.35 (t, *J* = 7.9 Hz, 1H), 7.28 – 7.16 (m, 3H), 7.03 – 6.98 (m, 2H), 6.98 – 6.91 (m, 1H), 6.81 (d, *J* = 7.0 Hz, 1H), 6.67 (d, *J* = 11.2 Hz, 1H), 6.54 – 6.50 (m, 2H), 6.36 (d, *J* = 6.3 Hz, 2H), 6.23 (s, 1H), 6.15 (t, *J* = 4.2 Hz, 1H), 5.96 (s, 2H), 5.81 – 5.74 (m, 2H), 4.56 (d, *J* = 4.1 Hz, 1H), 4.23 – 4.05 (m, 2H), 3.79 (d, *J* = 4.8 Hz, 3H), 3.73 (s, 3H), 3.70 (s, 3H), 2.83 (dd, *J* = 14.6, 4.4 Hz, 1H), 2.76 – 2.64 (m, 1H), 2.54 – 2.41 (m, 1H), 2.40 – 2.35 (m, 3H), 1.92 – 1.78 (m, 2H).**13C NMR** (101 MHz, Chloroform-*d*) δ 173.72, 173.66, 173.6, 152.7, 148.2, 147.6, 143.3, 139.23, 139.18, 137.17, 137.1, 134.93, 134.89, 133.8, 132.3, 129.2, 128.32, 128.30, 128.0, 127.3, 125.8, 124.6, 121.5, 120.3, 120.1, 118.0, 117.2, 109.8, 108.11, 108.06, 107.0, 101.7, 100.6, 100.5, 73.64, 73.59, 71.4, 60.8, 59.79, 59.78, 56.2, 56.1, 45.6, 45.5, 43.7, 38.7, 33.4, 26.0, 25.9, 23.2, 23.1. **HRMS(ESI+)** m/z calcd. for C43H39NO9 + [M+Na]+: 736.2517, found: 736.2518.

**3-(4-phenyl-4*H*-pyrrolo[3,2,1-*ij*]quinolin-2-yl)propyl2-(1-(4-chlorobenzoyl)-5-methoxy-2-methyl-1*H*-indol-3-yl)acetate (21)**

Prepared according to **GP3**. White oil (95.0 mg, 76%, 0.2 mmol scale); **1H NMR** (400 MHz, Chloroform-*d*) δ 7.59 (d, *J* = 8.5 Hz, 2H), 7.36 (dd, *J* = 15.2, 8.2 Hz, 3H), 7.27 – 7.18 (m, 4H), 6.98 – 6.92 (m, 4H), 6.87 (d, *J* = 9.0 Hz, 1H), 6.81 (d, *J* = 7.0 Hz, 1H), 6.68 (dd, *J* = 9.0, 2.5 Hz, 1H), 6.52 (dd, *J* = 9.8, 1.7 Hz, 1H), 6.13 (s, 1H), 5.98 (d, *J* = 5.5 Hz, 1H), 5.75 (dd, *J* = 9.8, 4.2 Hz, 1H), 4.10 – 3.95 (m, 2H), 3.79 (s, 3H), 3.60 (s, 2H), 2.42 – 2.30 (m, 4H), 2.25 – 2.15 (m, 1H), 1.88 – 1.66 (m, 2H).**13C NMR** (101 MHz, Chloroform-*d*) δ 169.2, 166.8, 154.6, 141.7, 137.8, 134.4, 132.3, 132.2, 129.6, 129.3, 129.1, 127.62, 127.59, 126.4, 125.7, 124.2, 123.1, 120.0, 118.63, 118.58, 116.4, 115.5, 113.5, 111.1, 110.1, 99.9, 98.6, 62.6, 58.1, 54.2, 28.9, 25.5, 21.4, 11.9. **HRMS(ESI+)** m/z calcd. for C39H33ClN2O4 + [M+Na]+: 651.2021, found: 651.2018.

**1-(8-methoxy-2-phenyl-2,8-dihydroquinolin-8-yl)-4-phenylbutan-2-one (22)**

Prepared according toaforementioned method. Yellow oil (39.5 mg, 52%, 0.2 mmol scale);**1H NMR** (400 MHz, Chloroform-*d*) δ 7.33 – 7.20 (m, 8H), 7.05 (d, *J* = 7.2 Hz, 2H), 6.83 – 6.73 (m, 2H), 6.69 (dd, *J* = 7.2, 1.6 Hz, 1H), 6.49 (d, *J* = 10.4 Hz, 1H), 5.93 (dd, *J* = 9.5, 5.6 Hz, 1H), 4.76 – 4.72 (m, 1H), 4.26 (d, *J* = 17.8 Hz, 1H), 3.90 (d, *J* = 17.8 Hz, 1H), 3.68 (s, 3H), 2.96 – 2.80 (m, 3H), 2.68 – 2.59 (m, 1H).**13C NMR** (101 MHz, Chloroform-*d*) δ 210.2, 149.6, 143.6, 141.3, 133.2, 128.7, 128.5, 127.4, 126.3, 126.1, 126.0, 124.6, 120.6, 120.5, 112.6, 65.5, 64.9, 55.8, 40.9, 29.6. **HRMS(ESI+)** m/z calcd. for C26H25NO2 + [M+H]+: 384.1958 found: 384.1964.

**3,3-dimethyl-1-(2-phenylquinolin-8-yl)butan-2-one (23)**

Prepared according toaforementioned method. White solid (16.2 mg, 27%, 0.2 mmol scale); **1H NMR** (400 MHz, Chloroform-*d*) δ 8.19 (d, *J* = 8.6 Hz, 1H), 8.13 (dd, *J* = 8.2, 1.4 Hz, 2H), 7.86 (d, *J* = 8.6 Hz, 1H), 7.74 (dd, *J* = 8.2, 1.2 Hz, 1H), 7.56 (d, *J* = 5.9 Hz, 1H), 7.39 – 7.27 (m, 4H), 4.61 (s, 2H), 1.34 (s, 9H).**13C NMR** (101 MHz, Chloroform-*d*) δ 213.8, 156.2, 146.6, 140.0, 137.2, 134.8, 131.2, 129.3, 128.7, 127.7, 127.4, 126.8, 126.1, 118.8, 44.8, 39.3, 27.1. **HRMS(ESI+)** m/z calcd. for C21H21NO+ [M+H]+: 304.1696 found: 304.1698.

8. NMR spectra


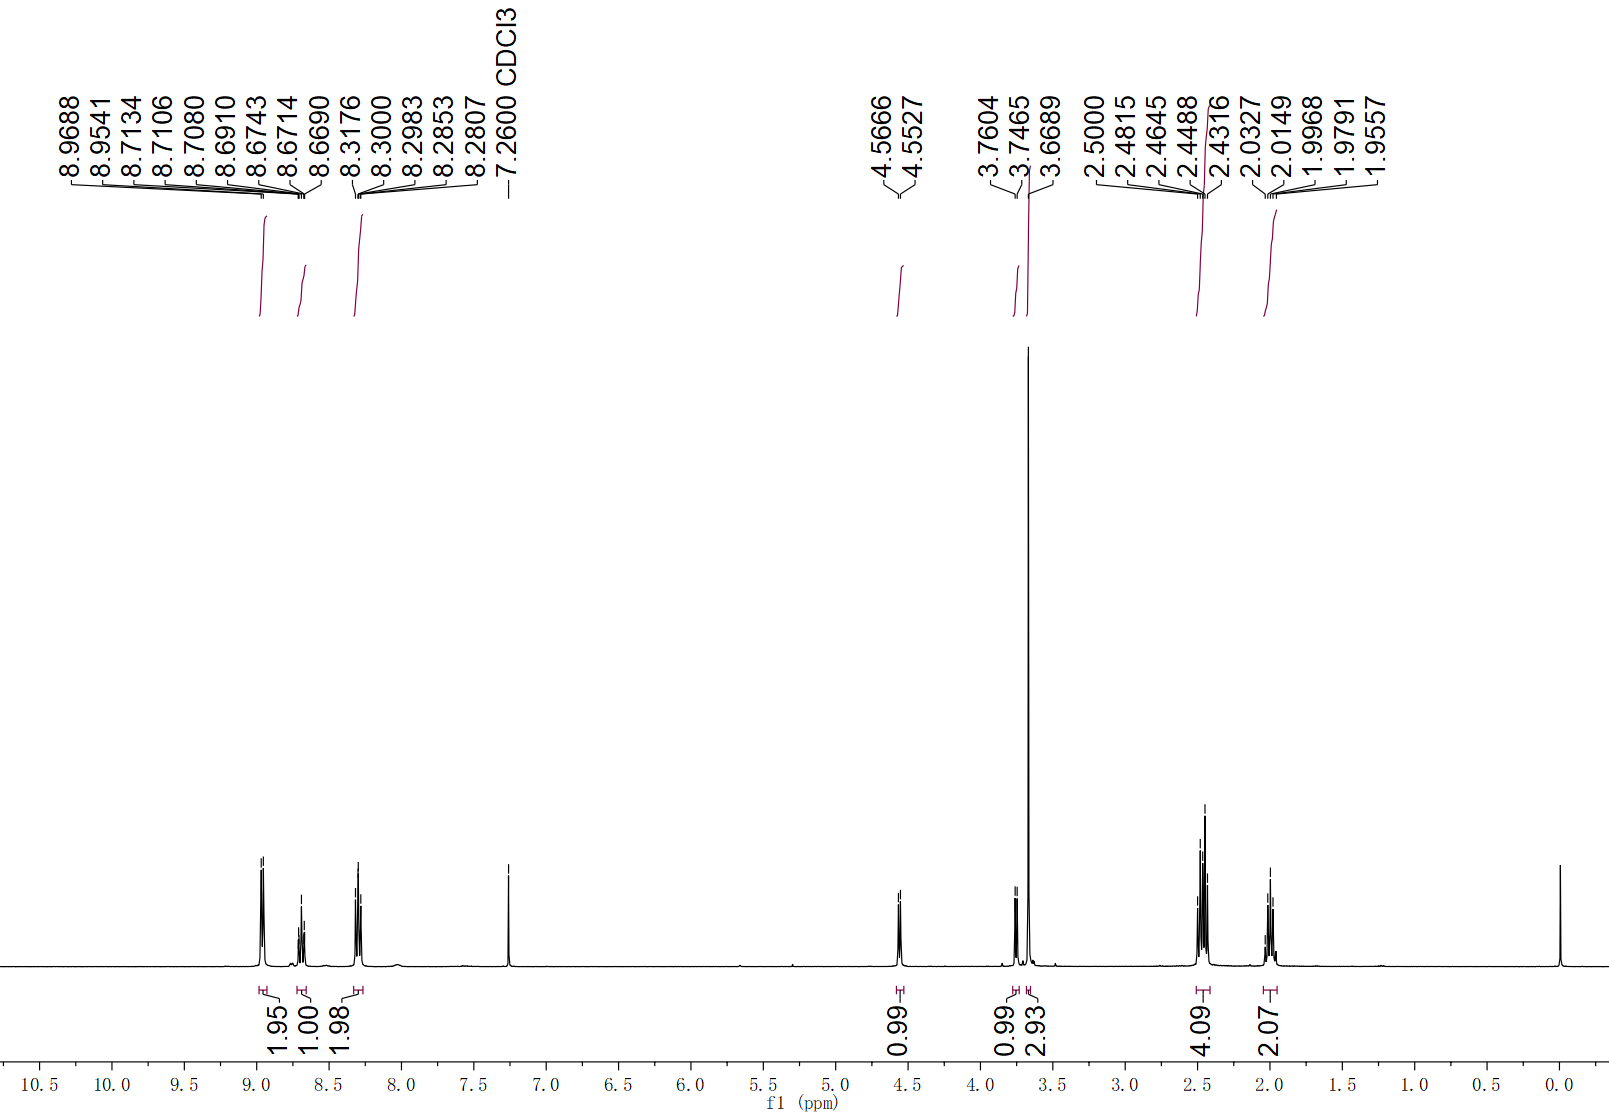


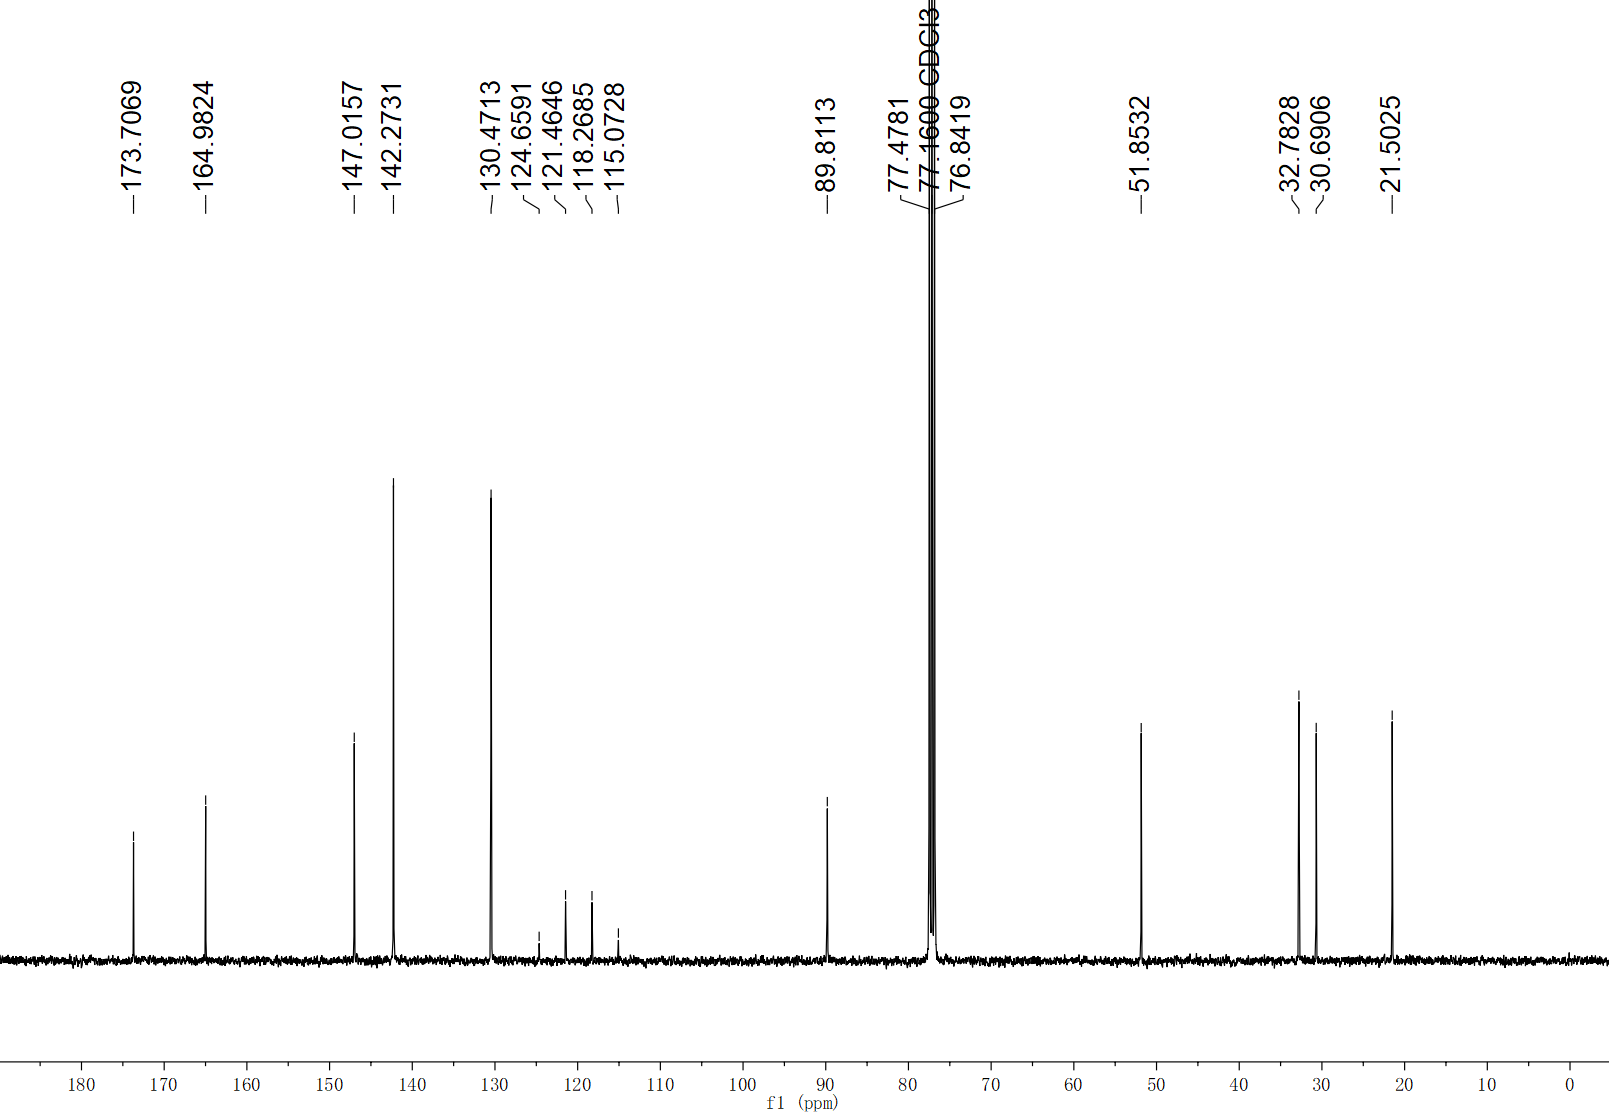


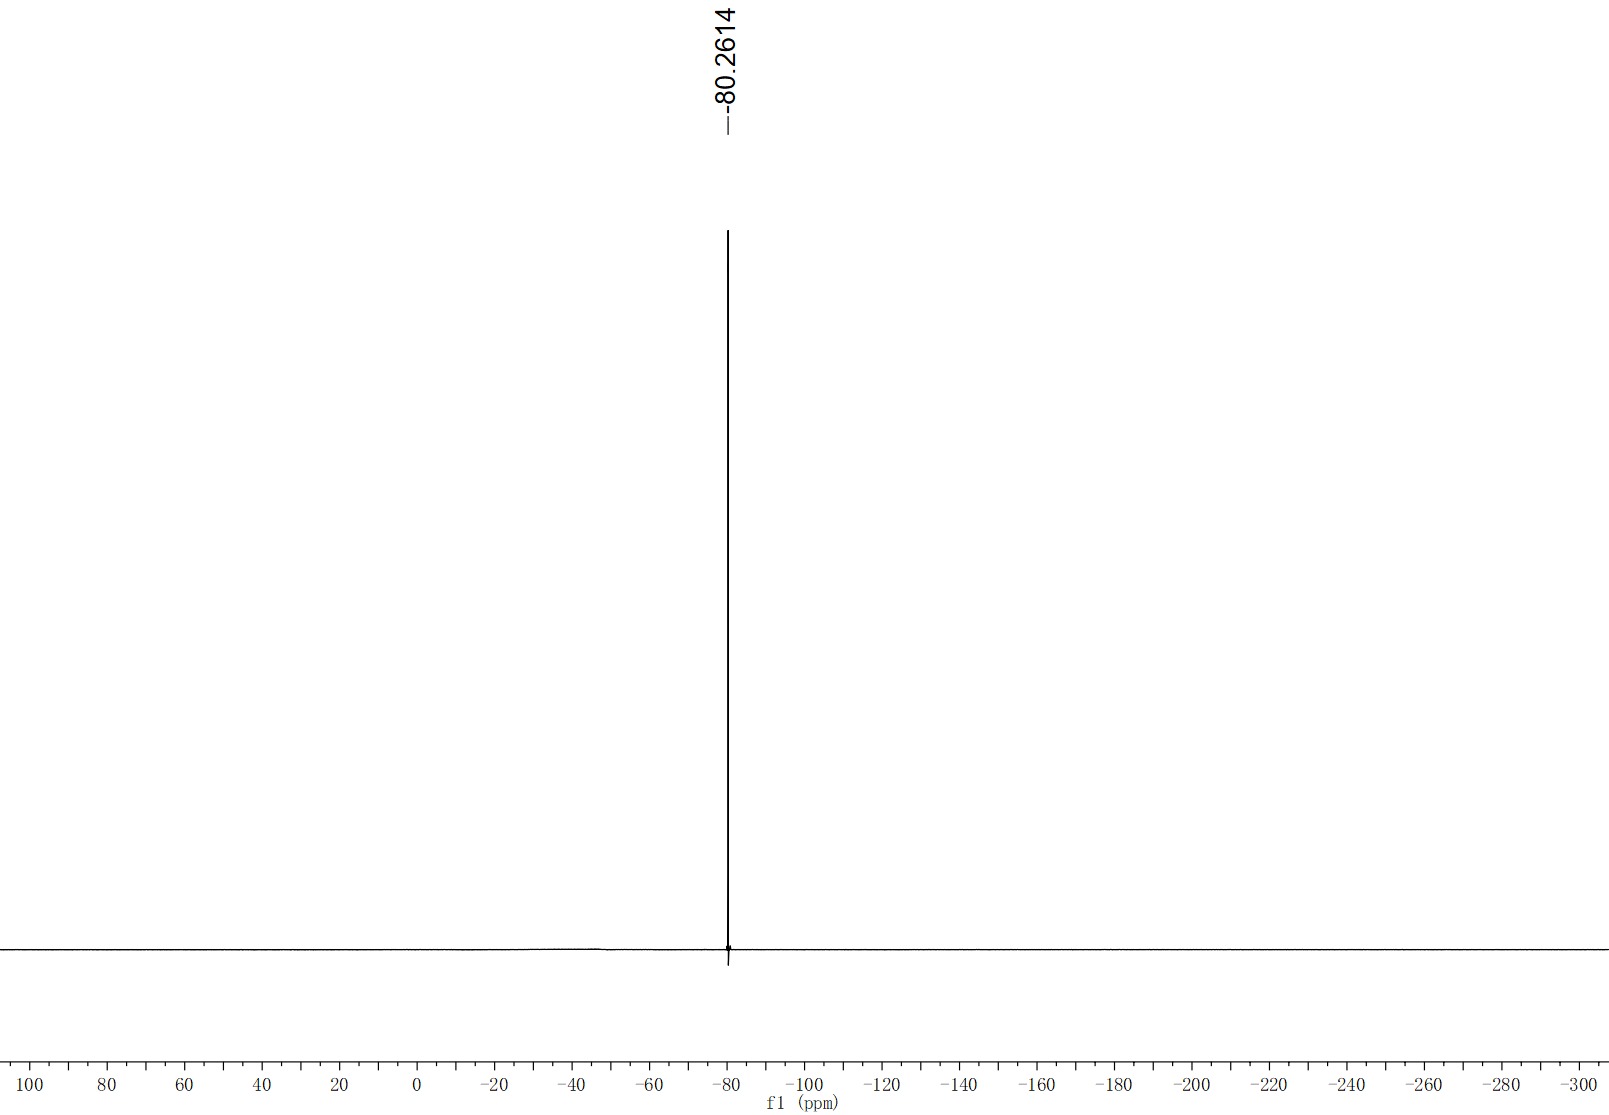


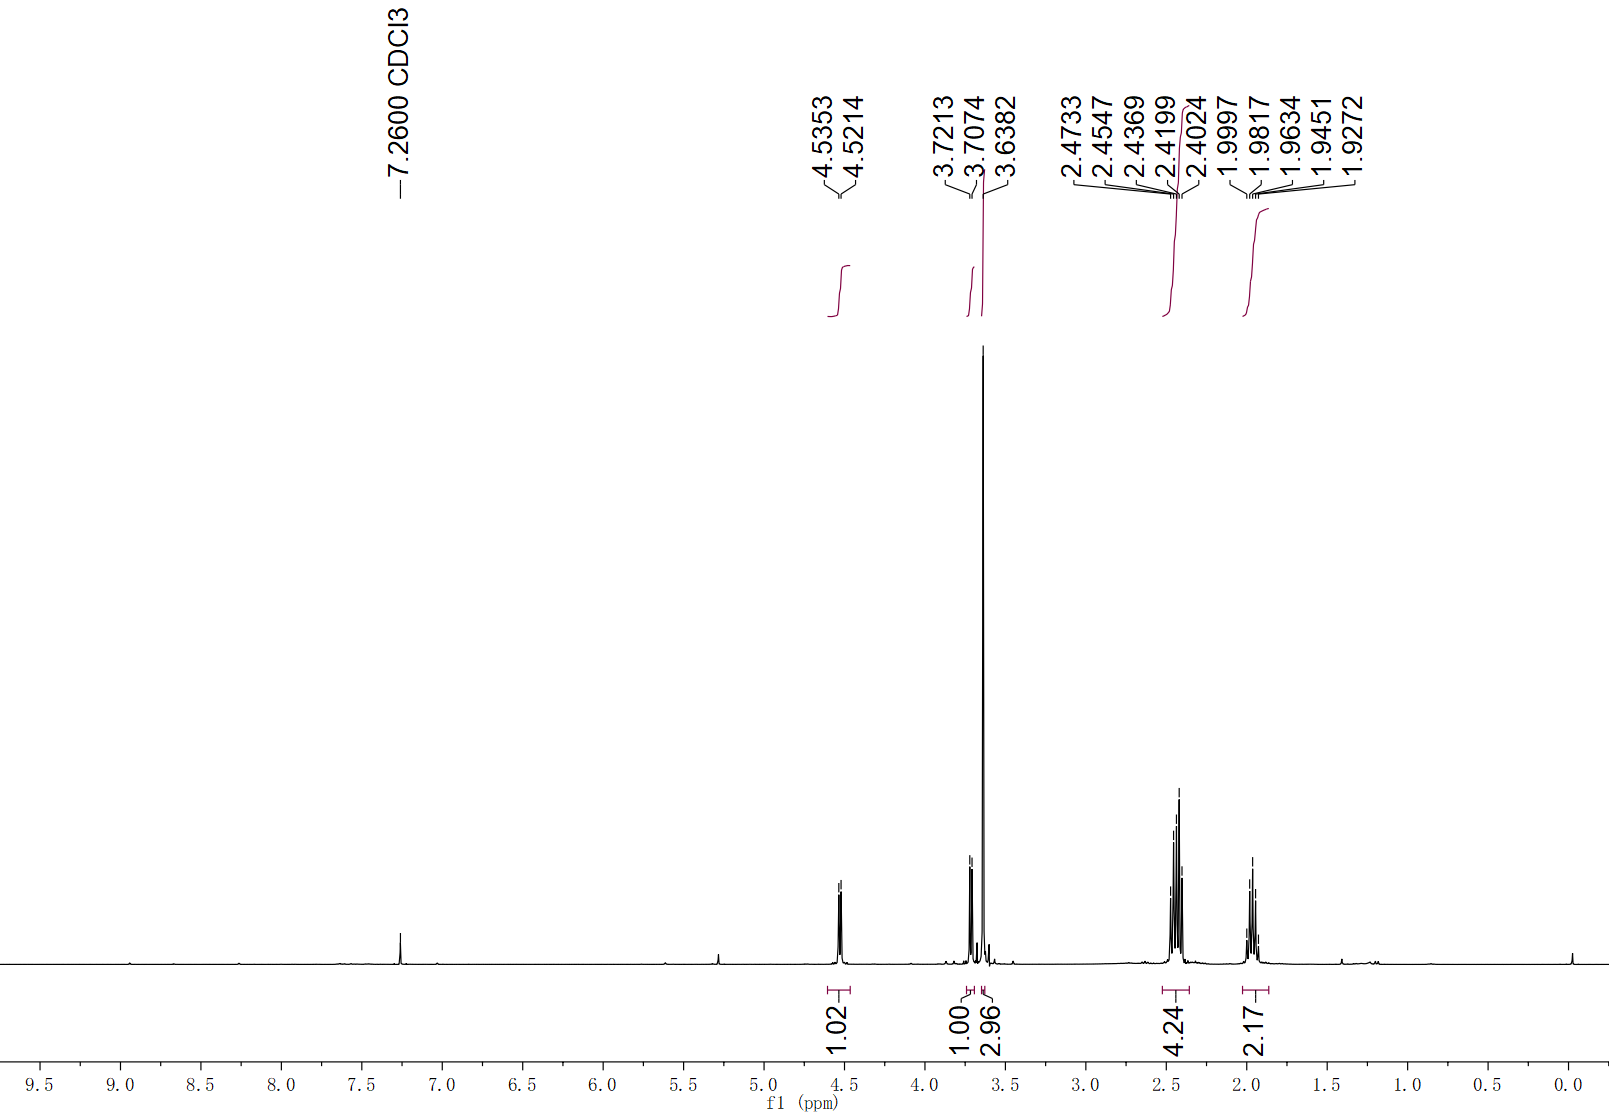


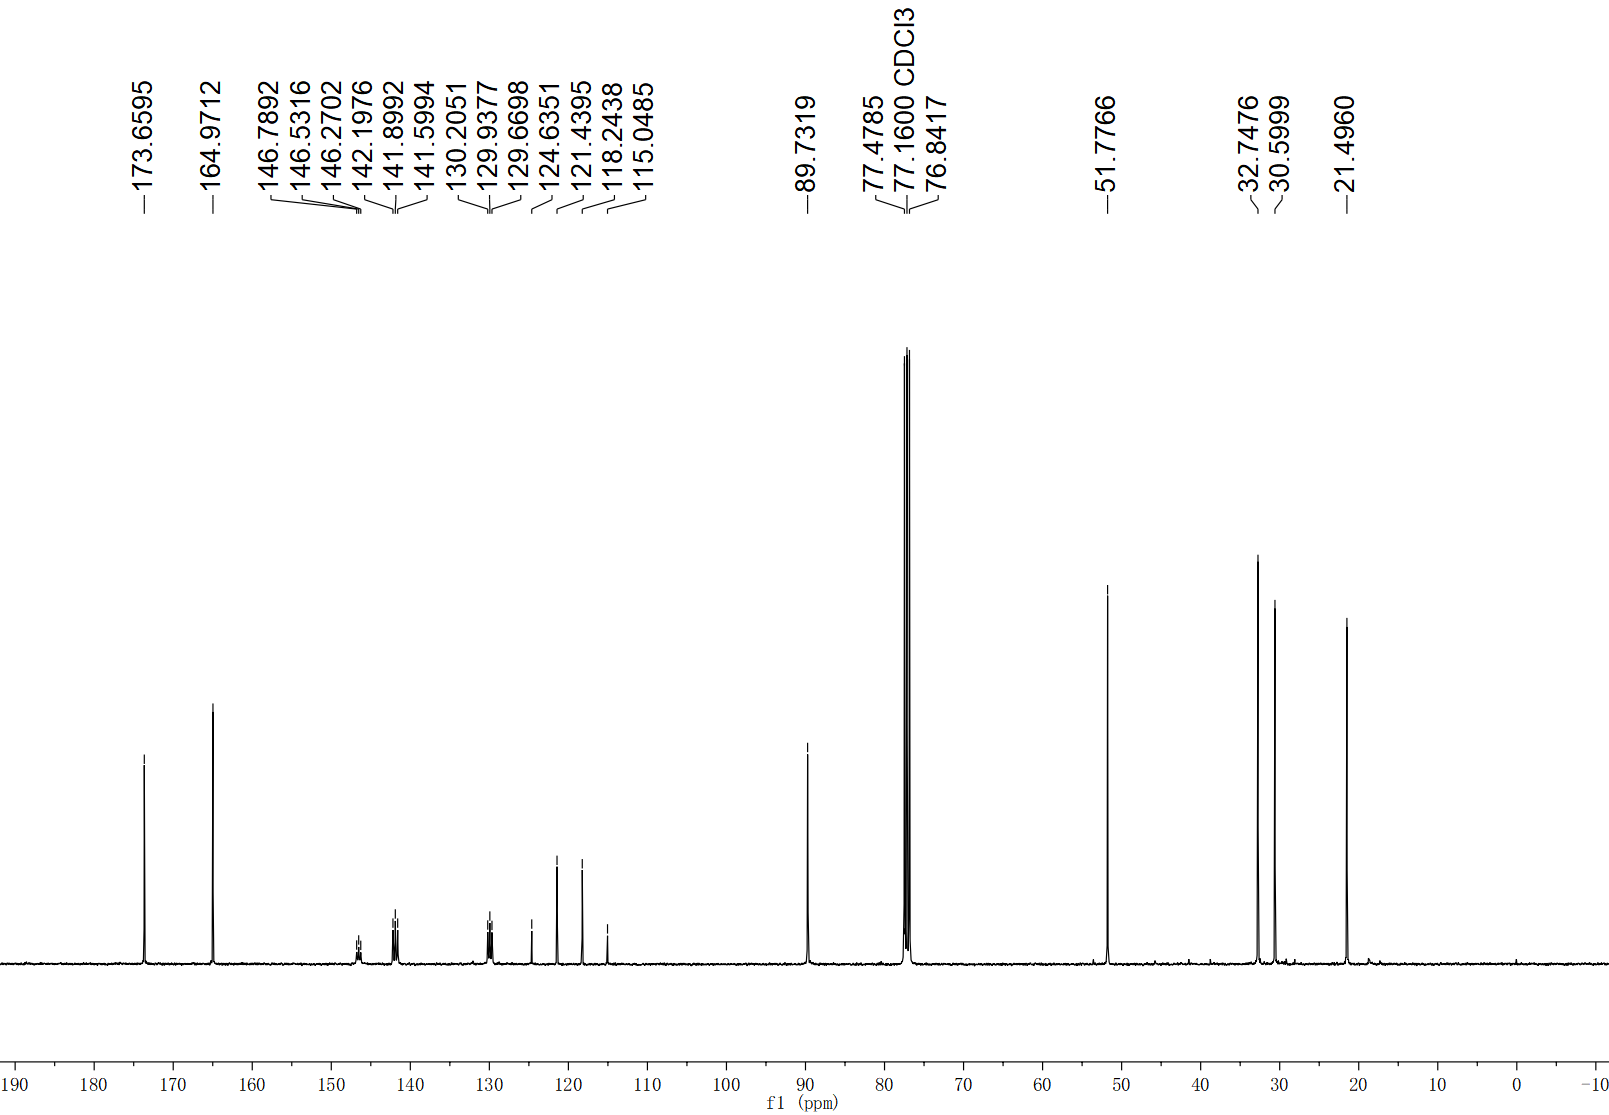


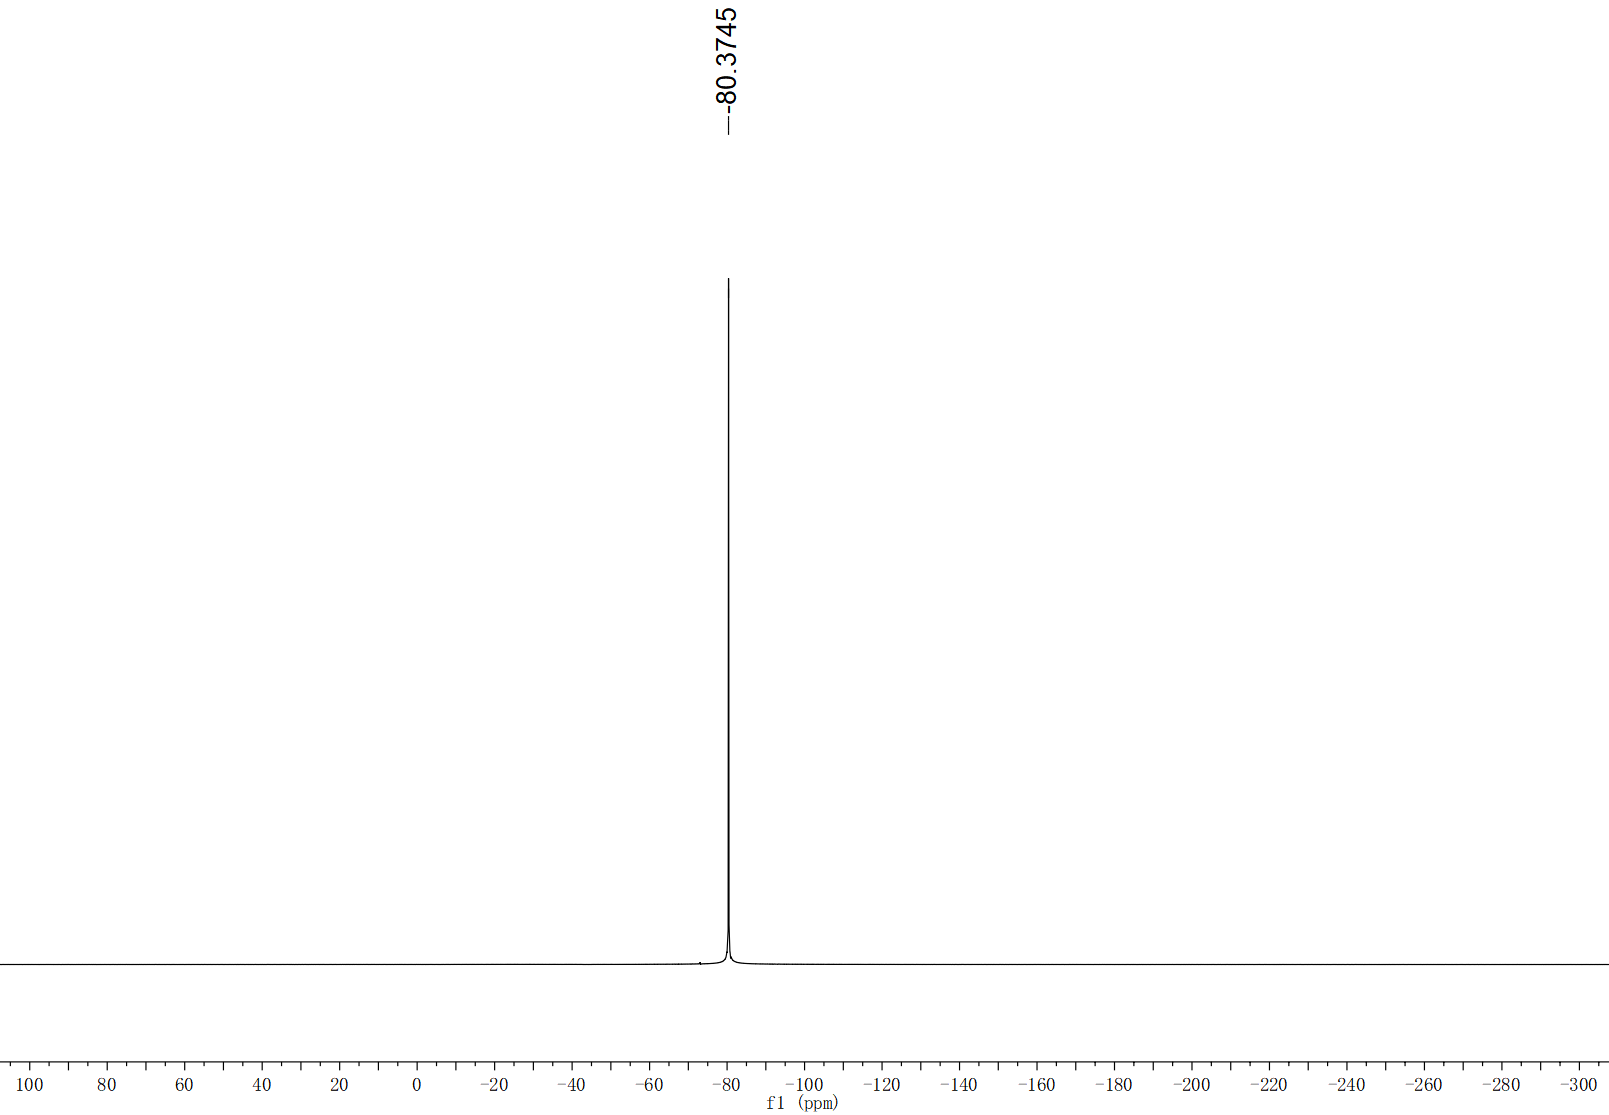


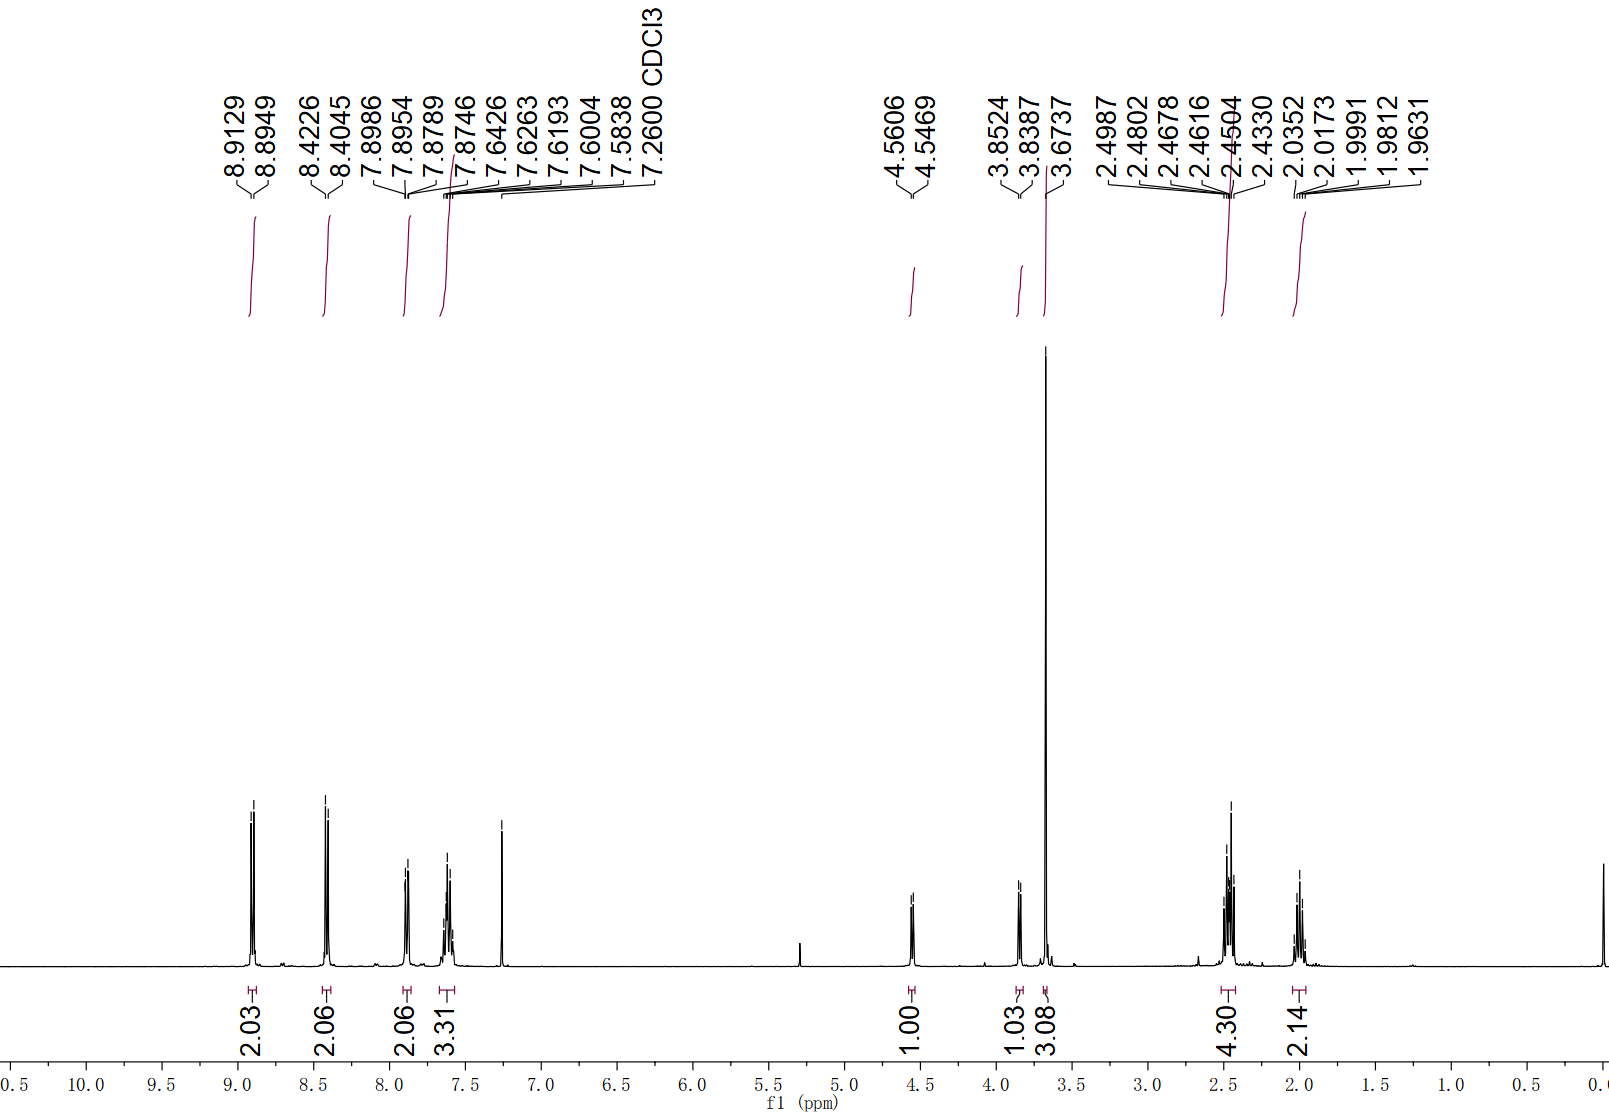


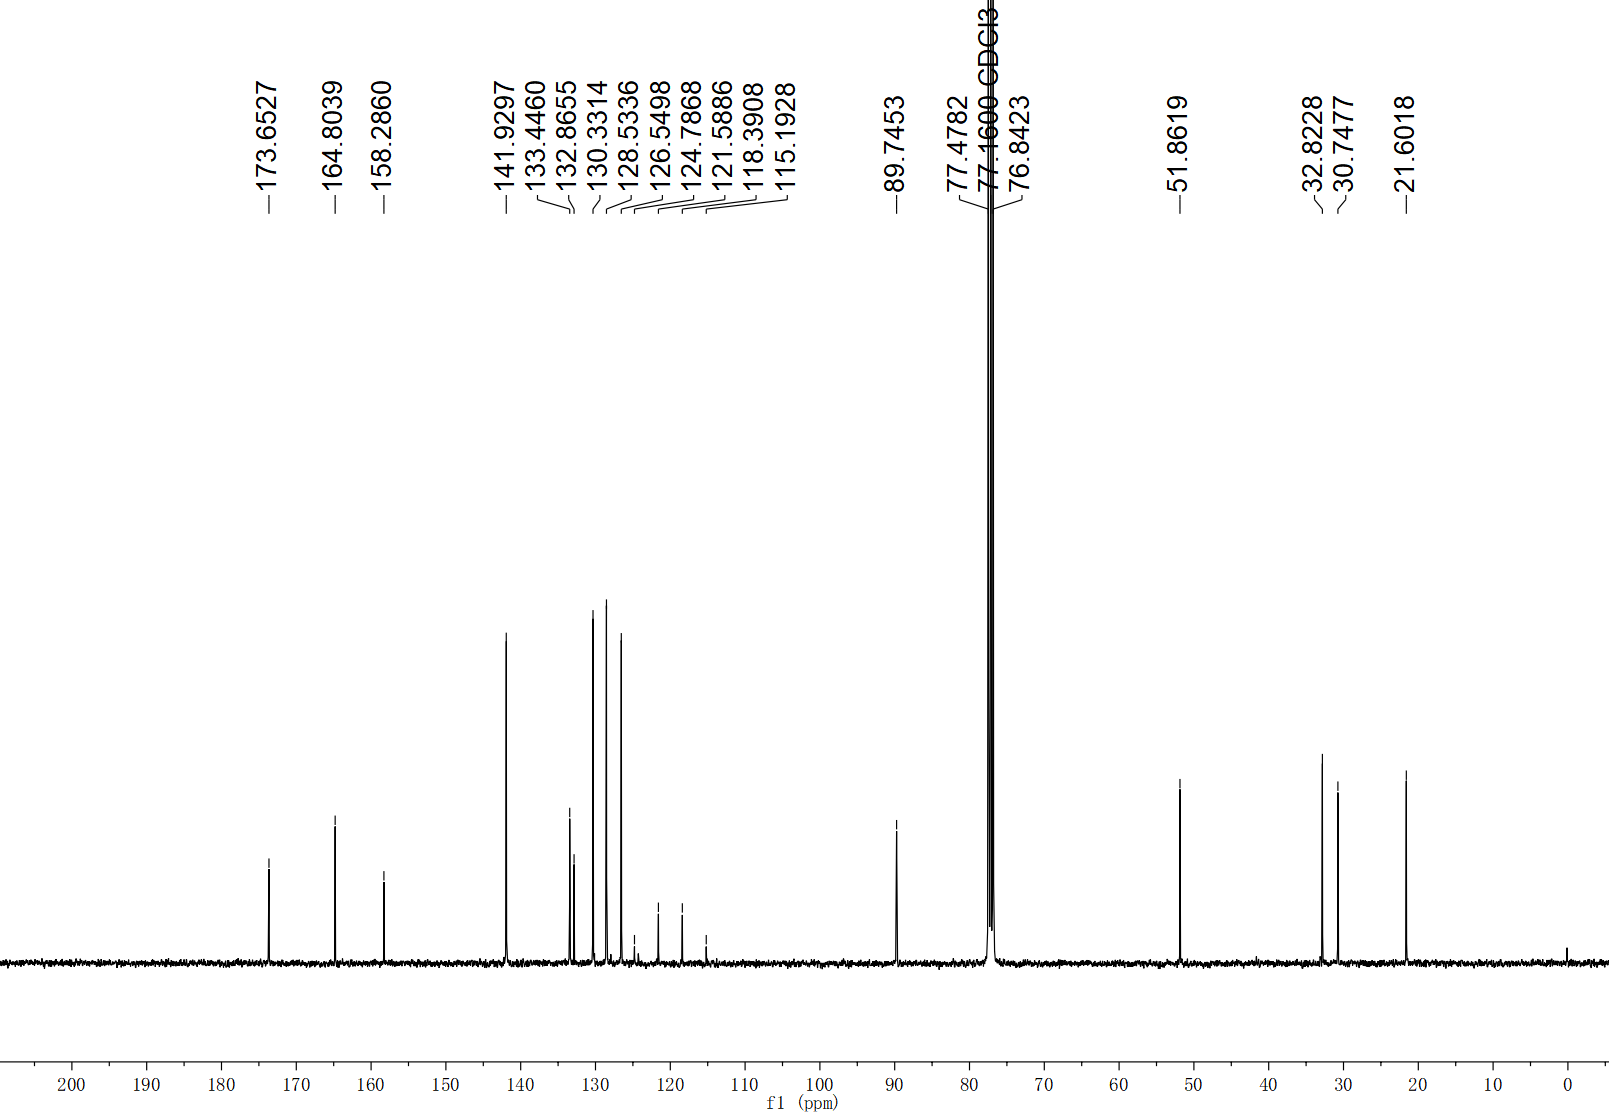


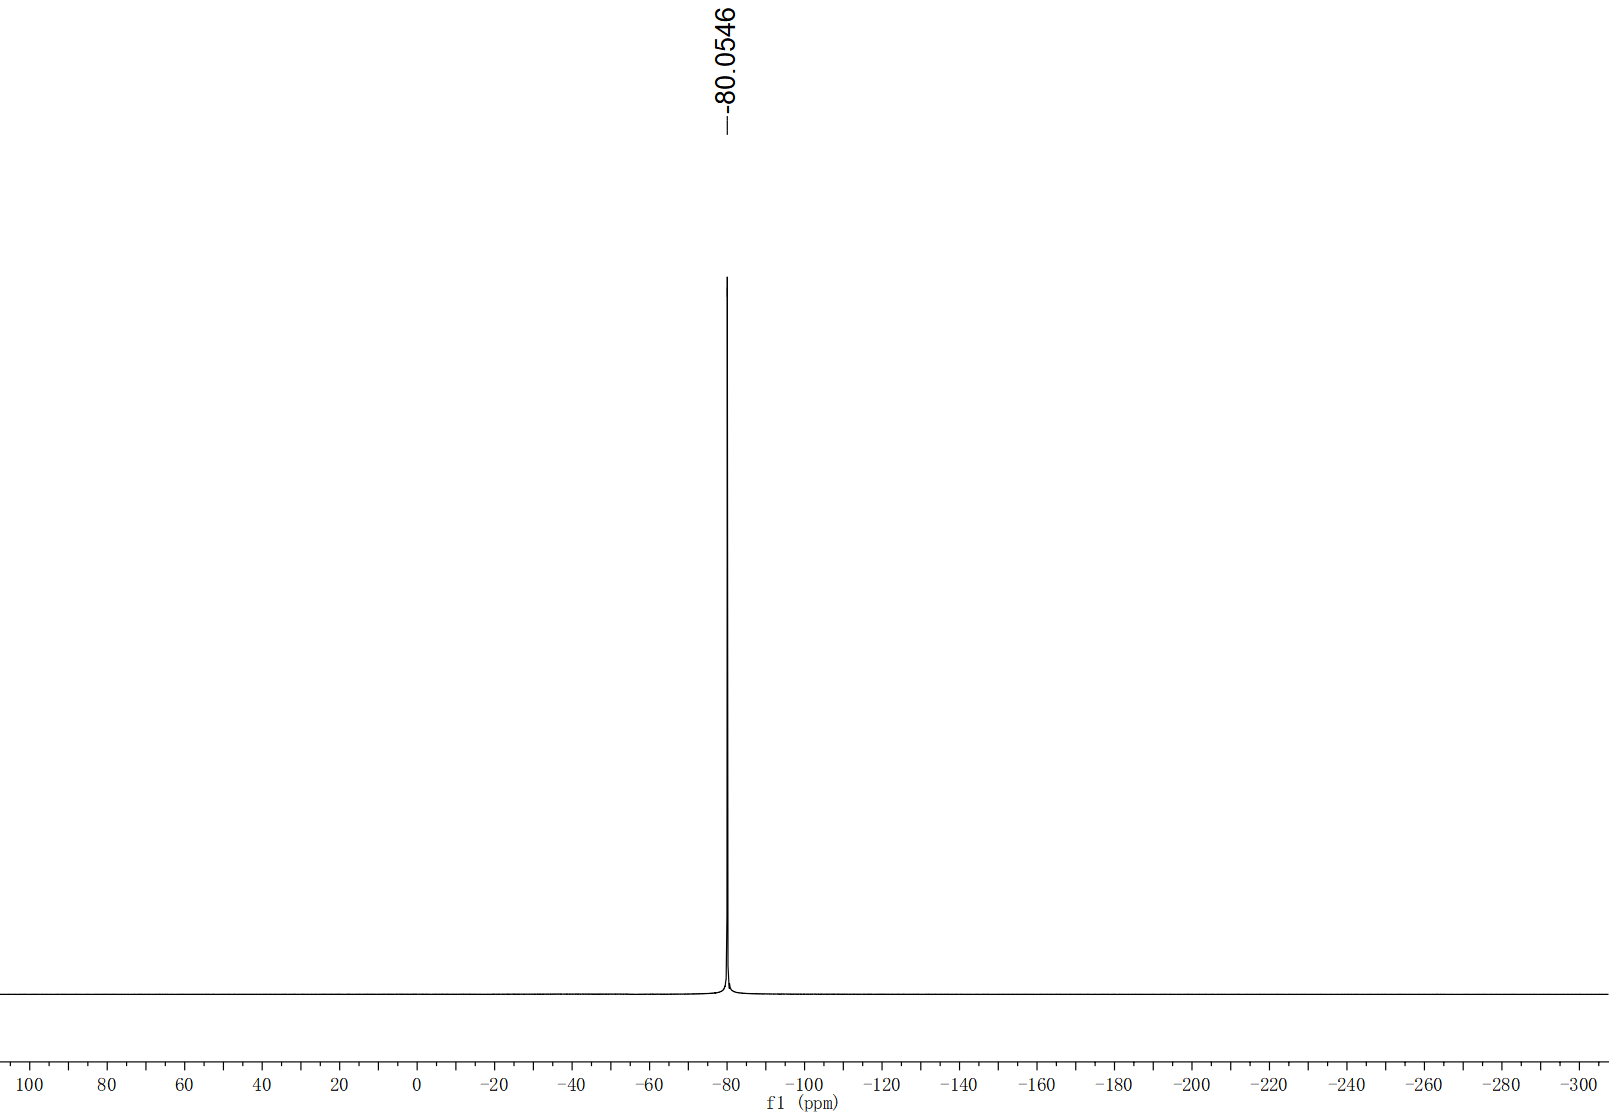


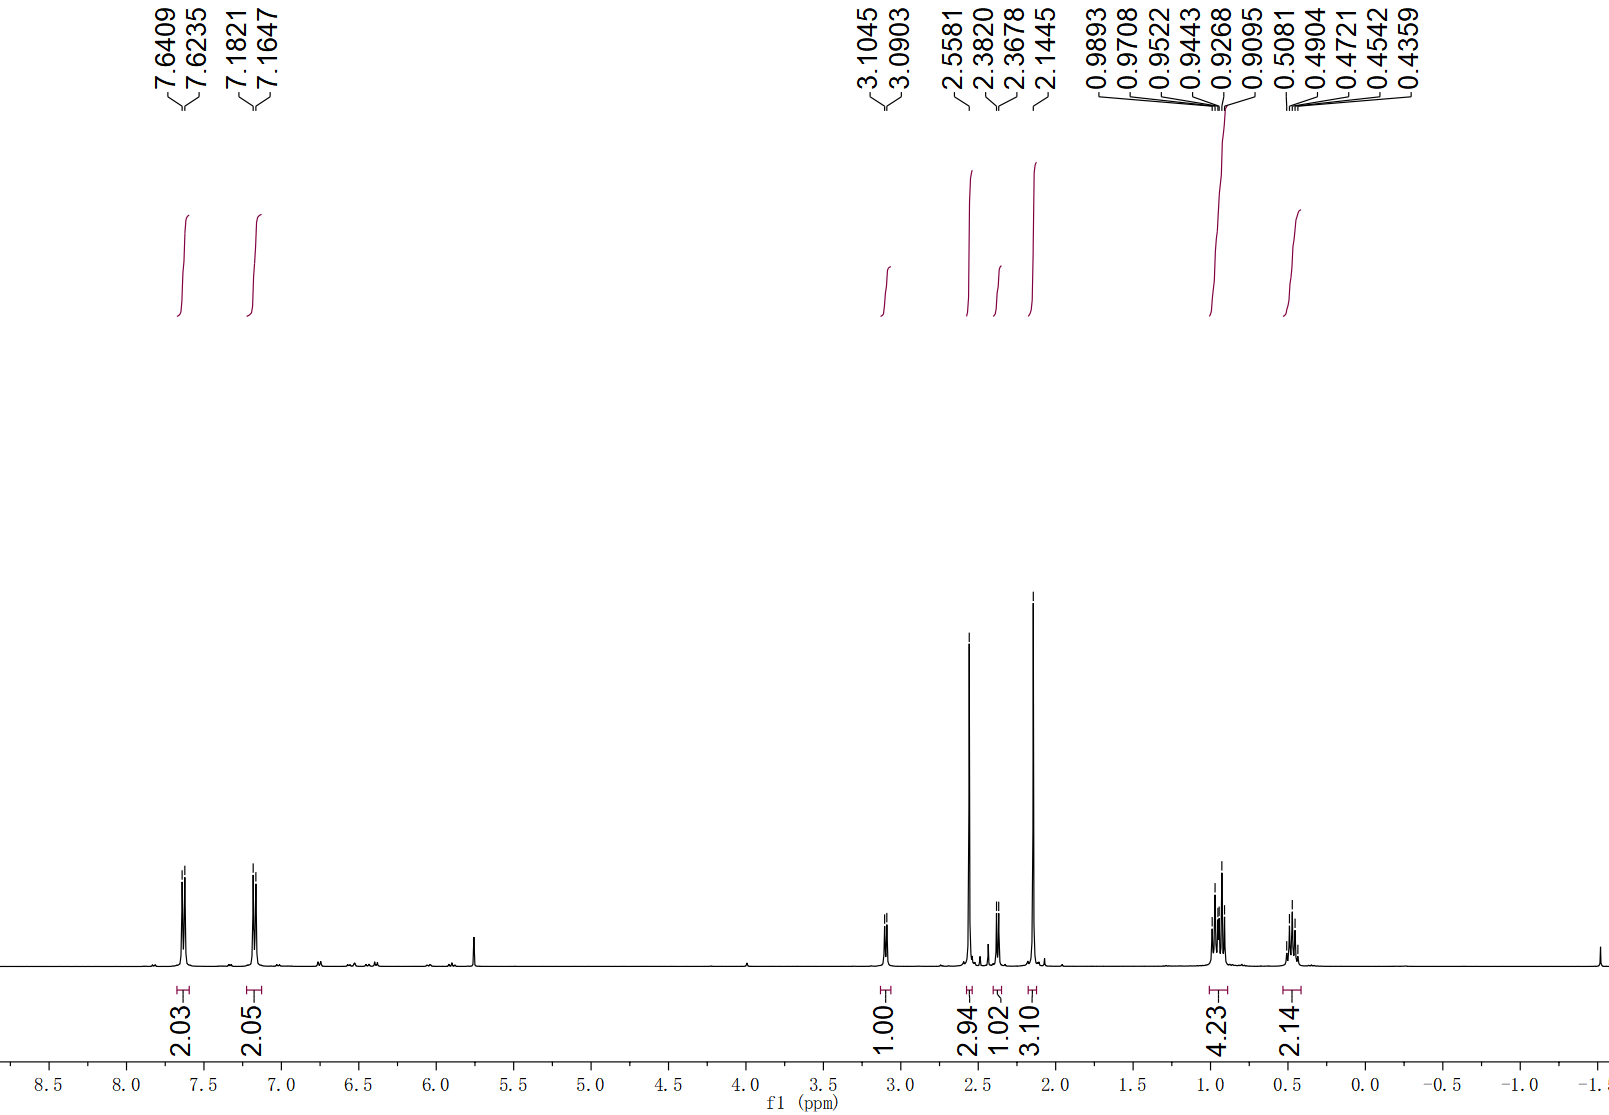


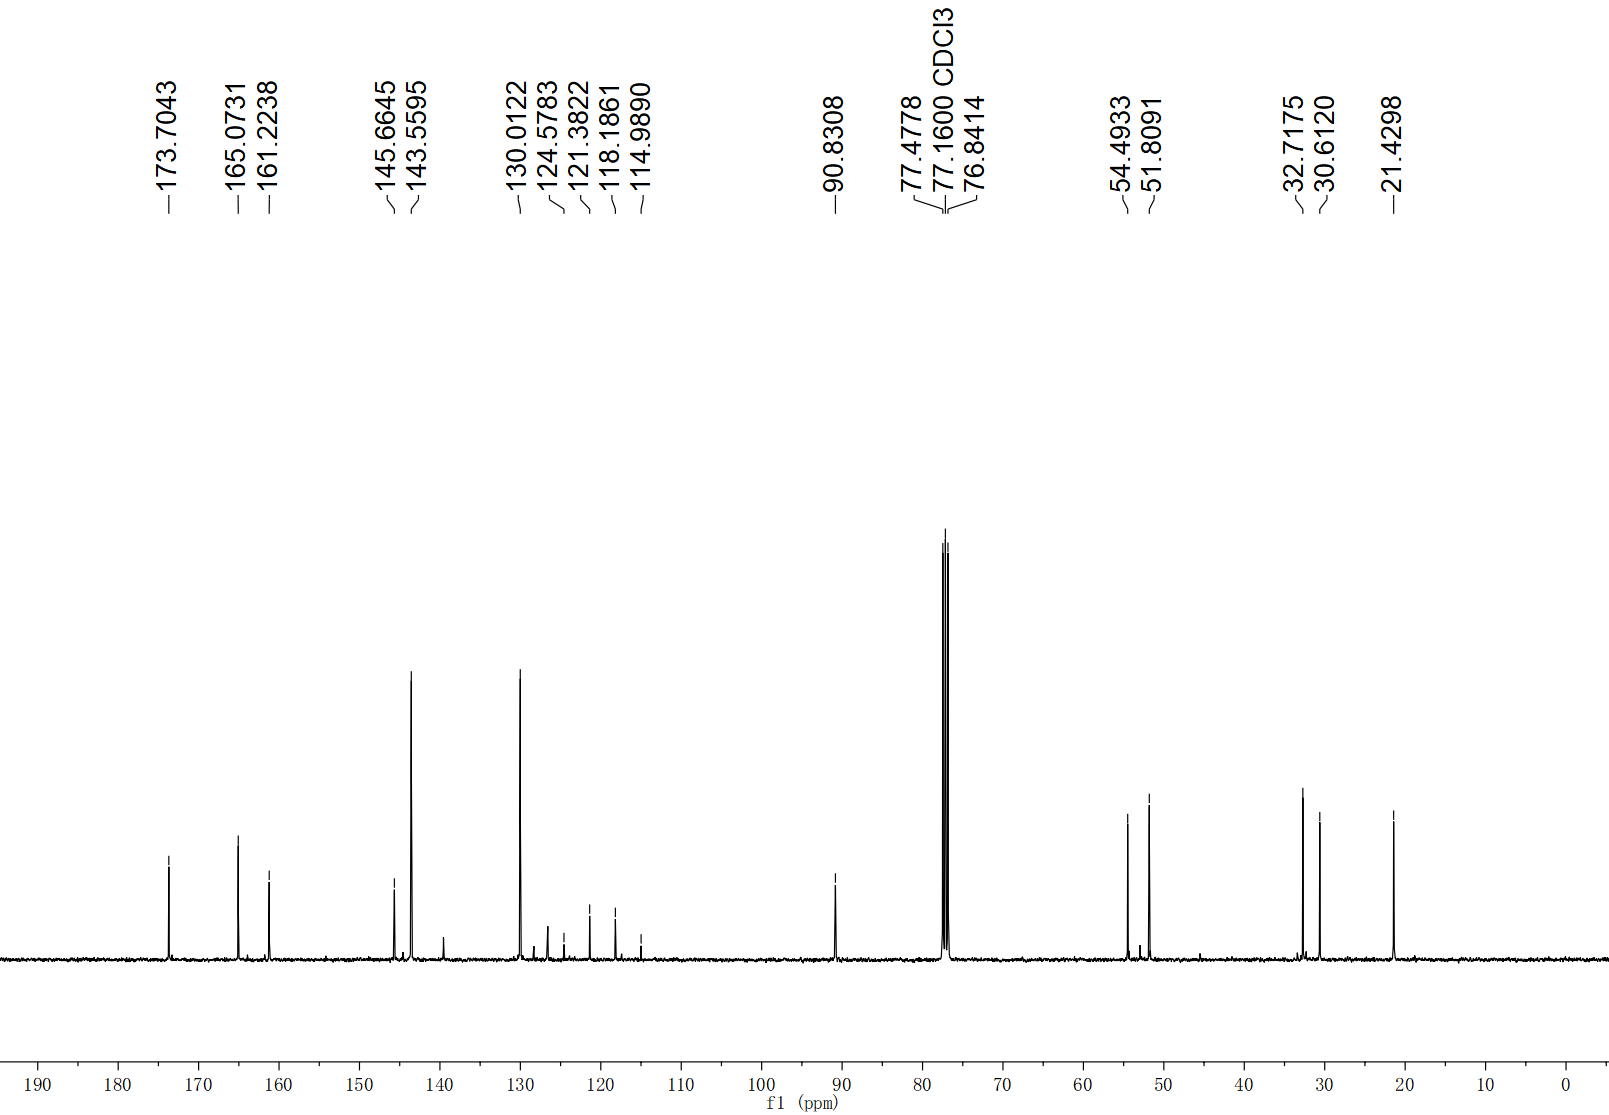


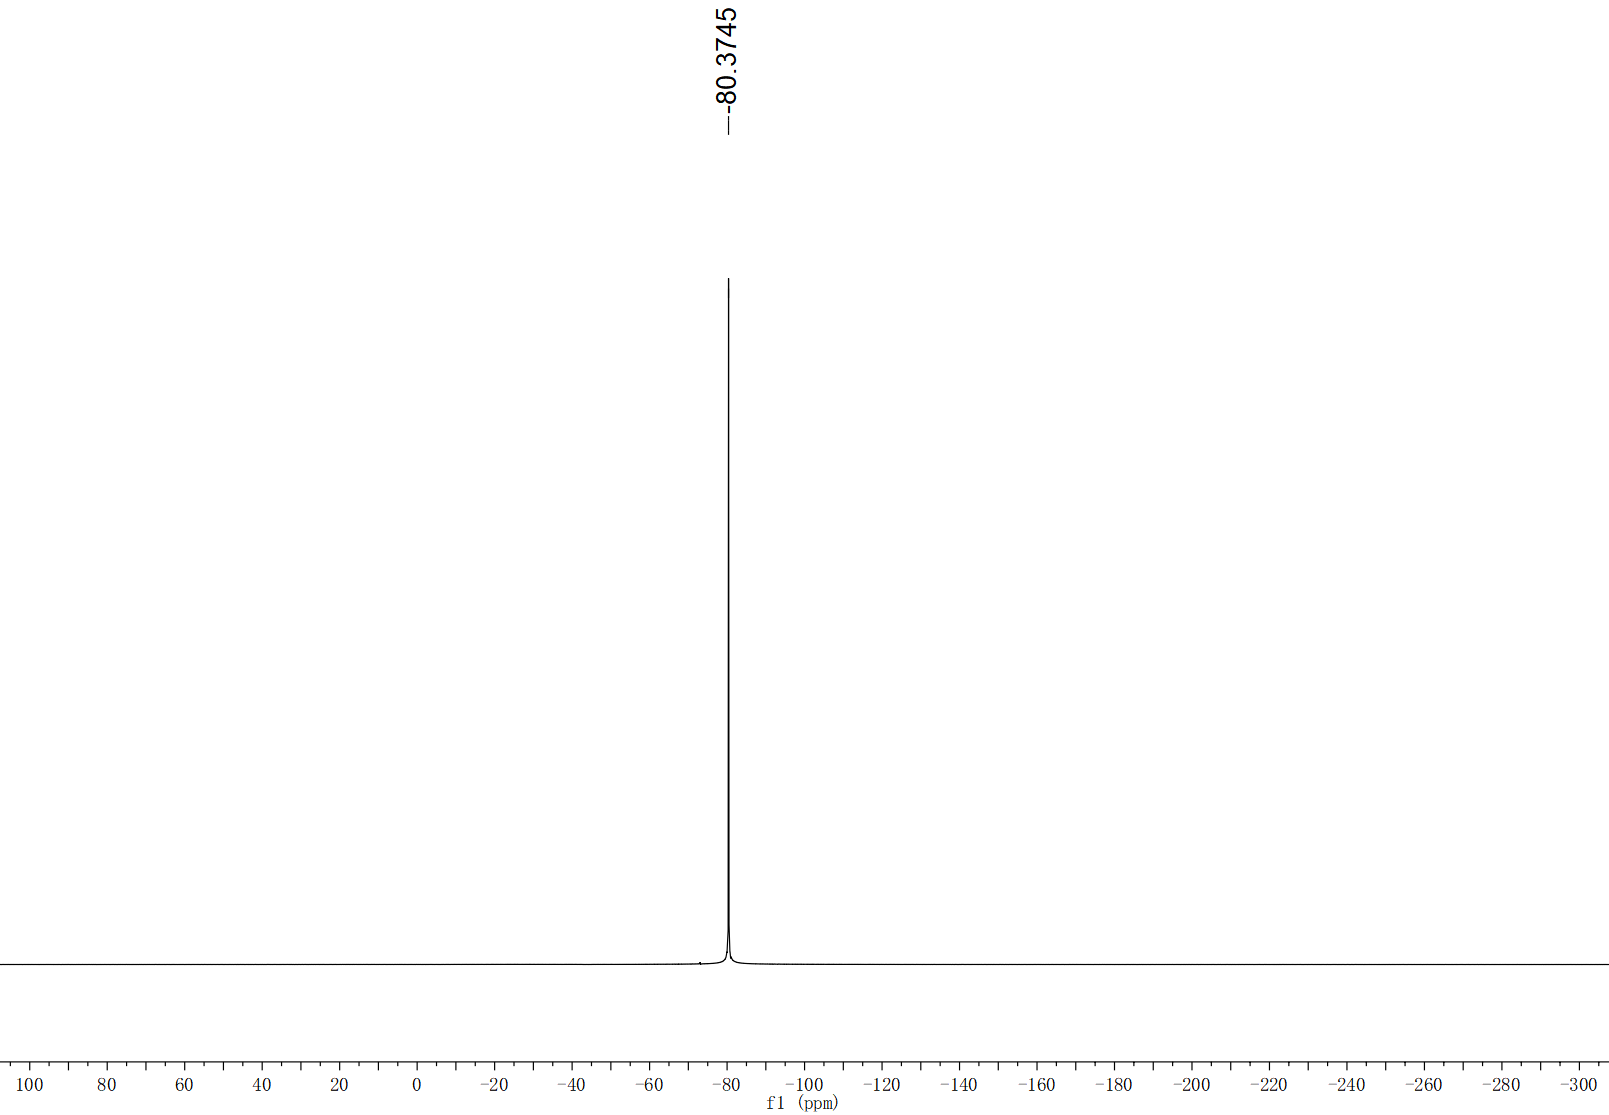


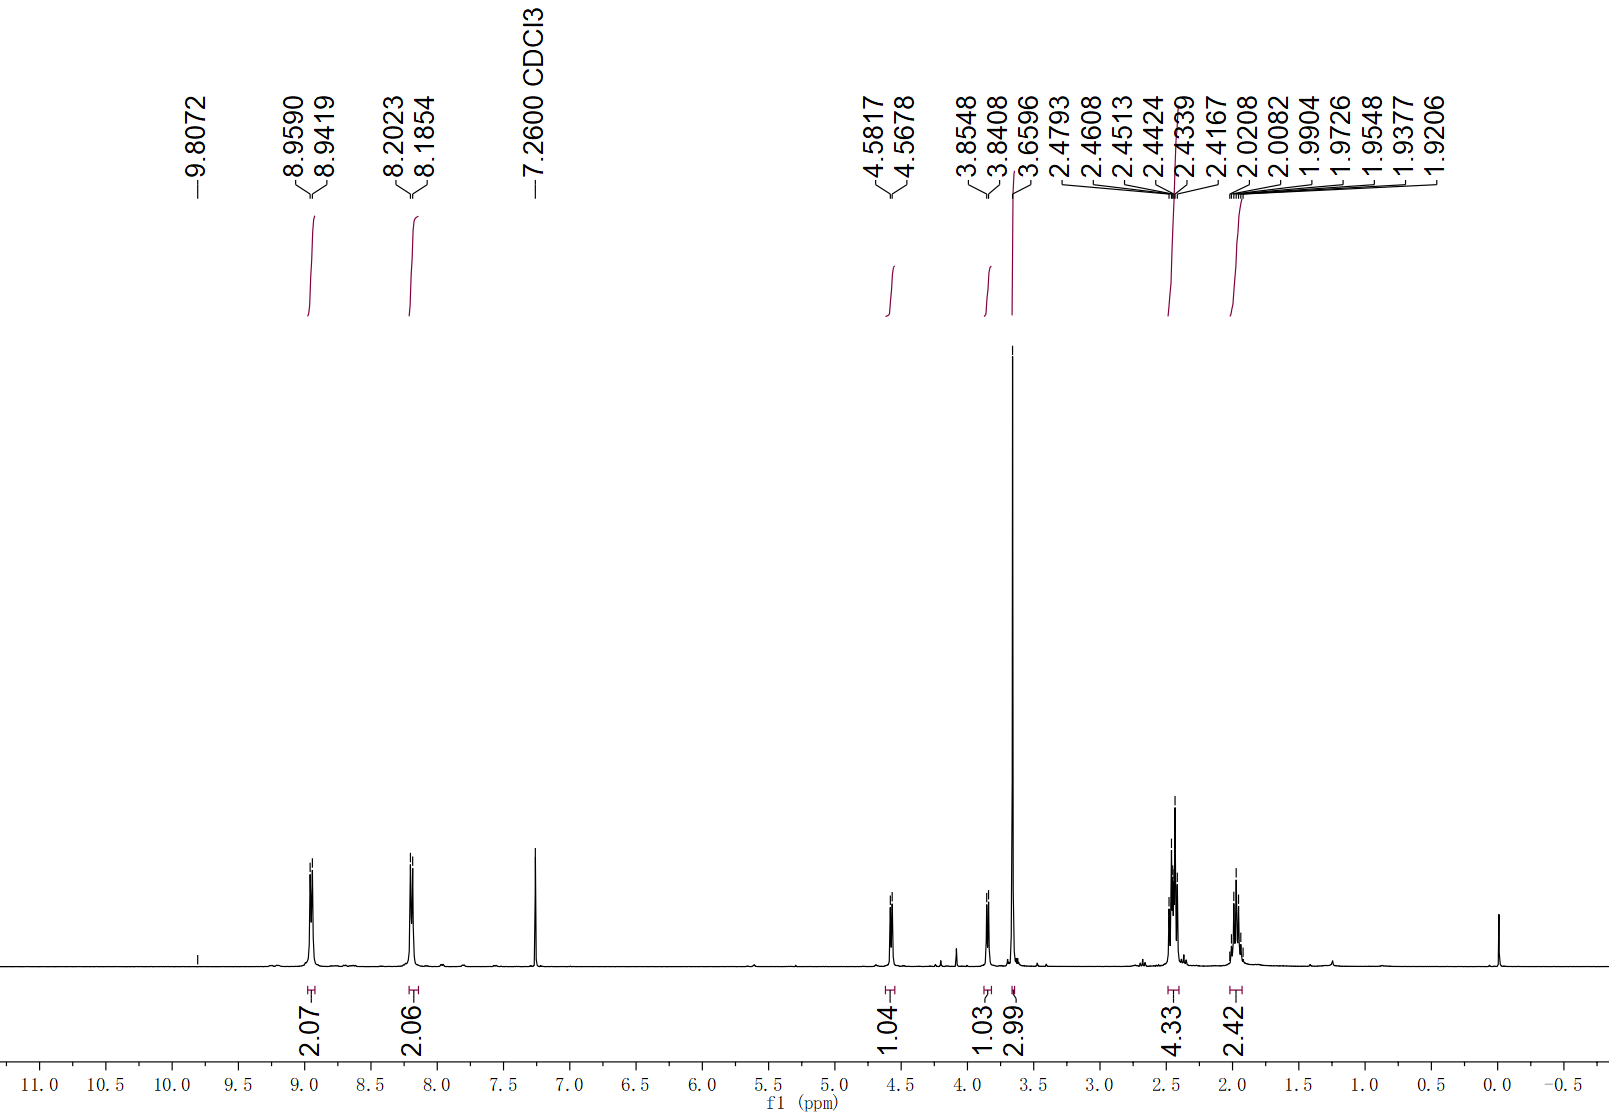


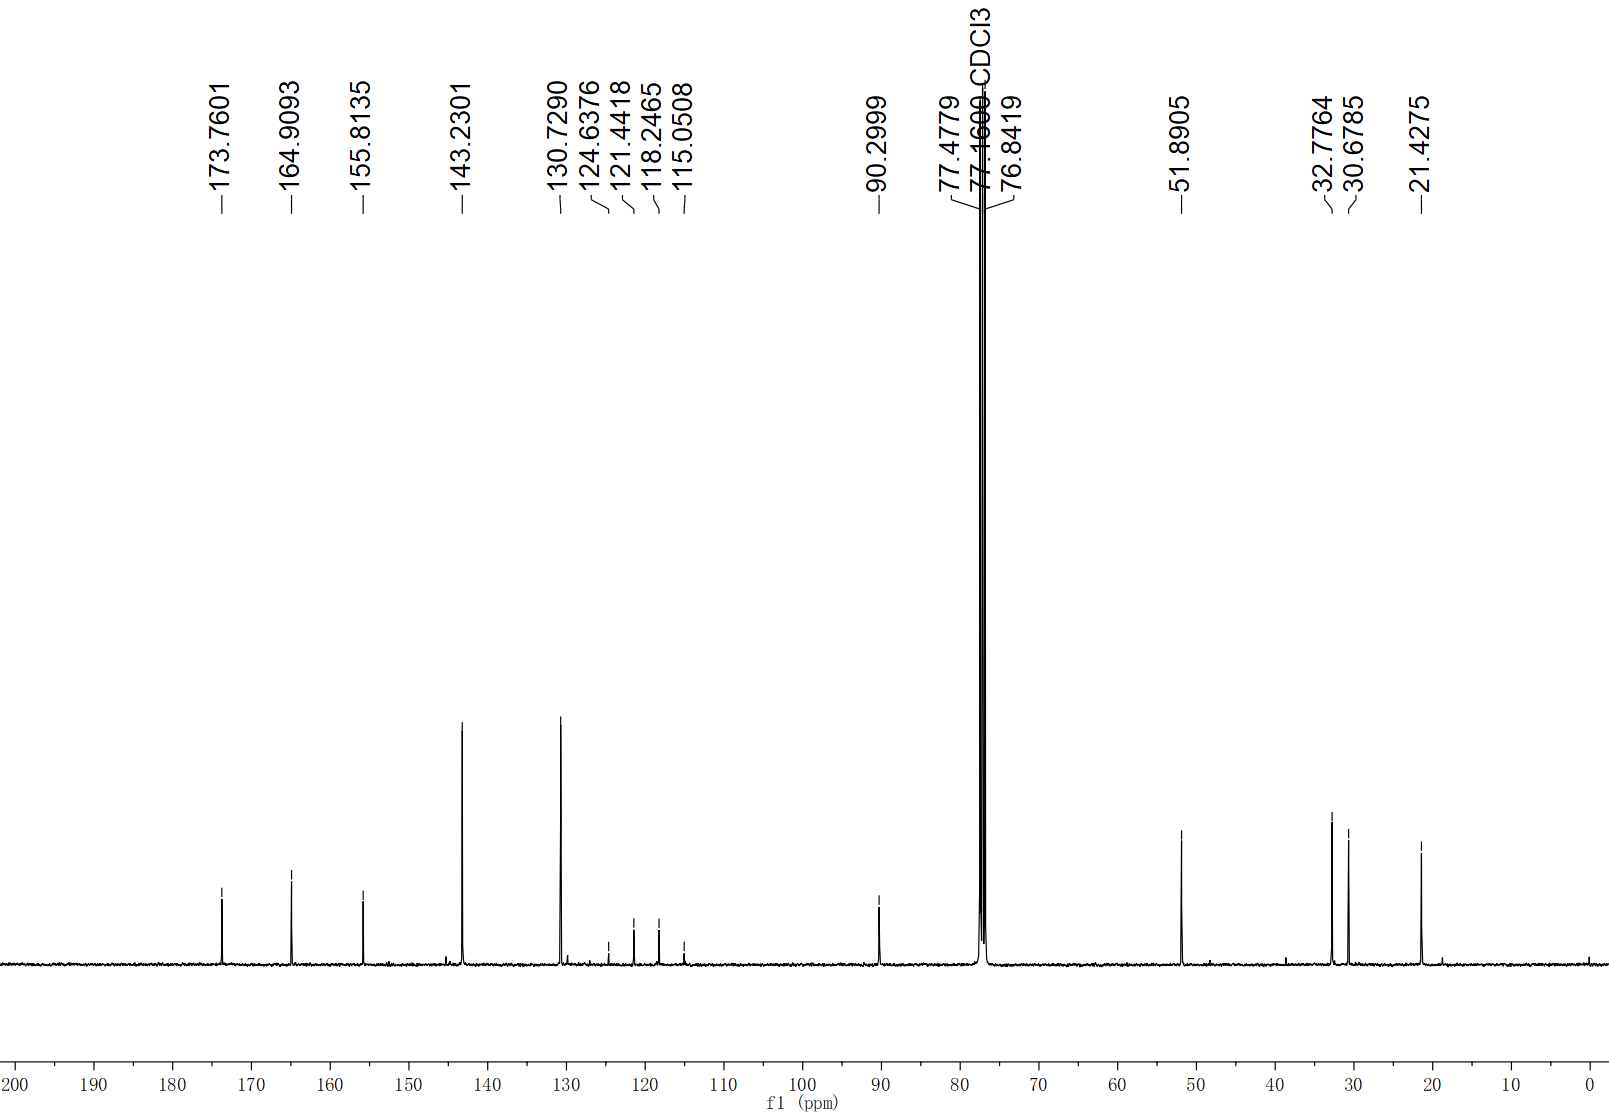


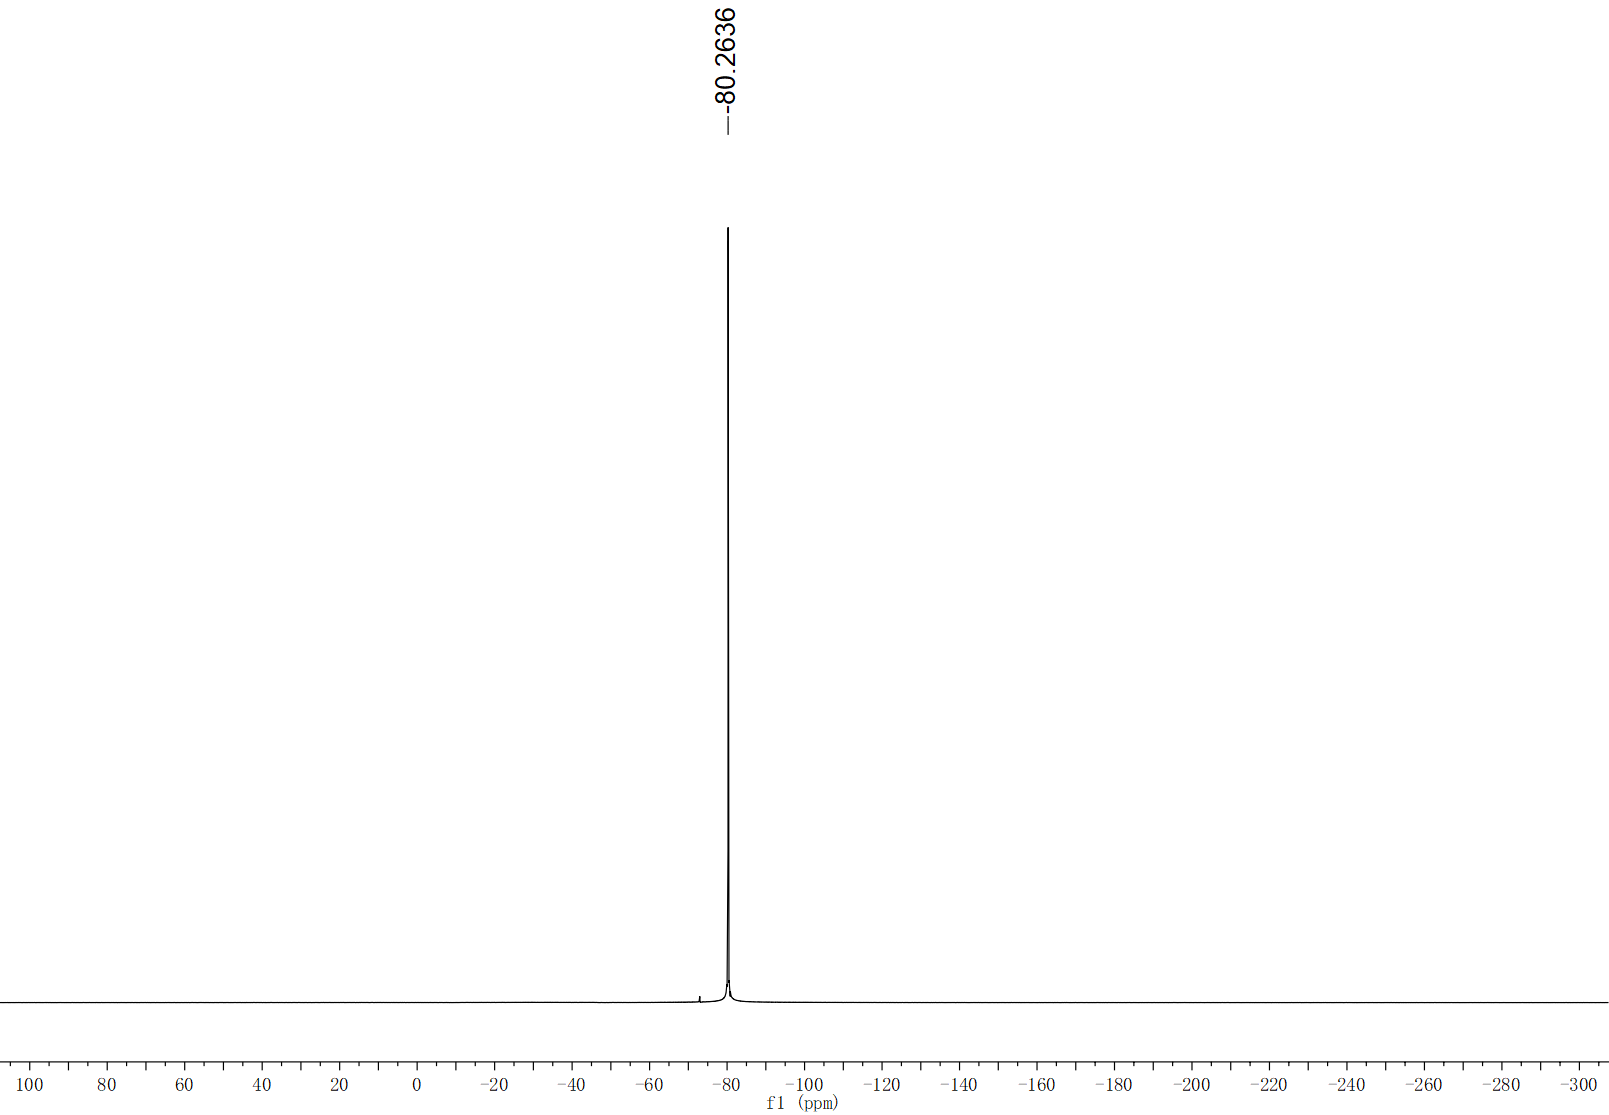


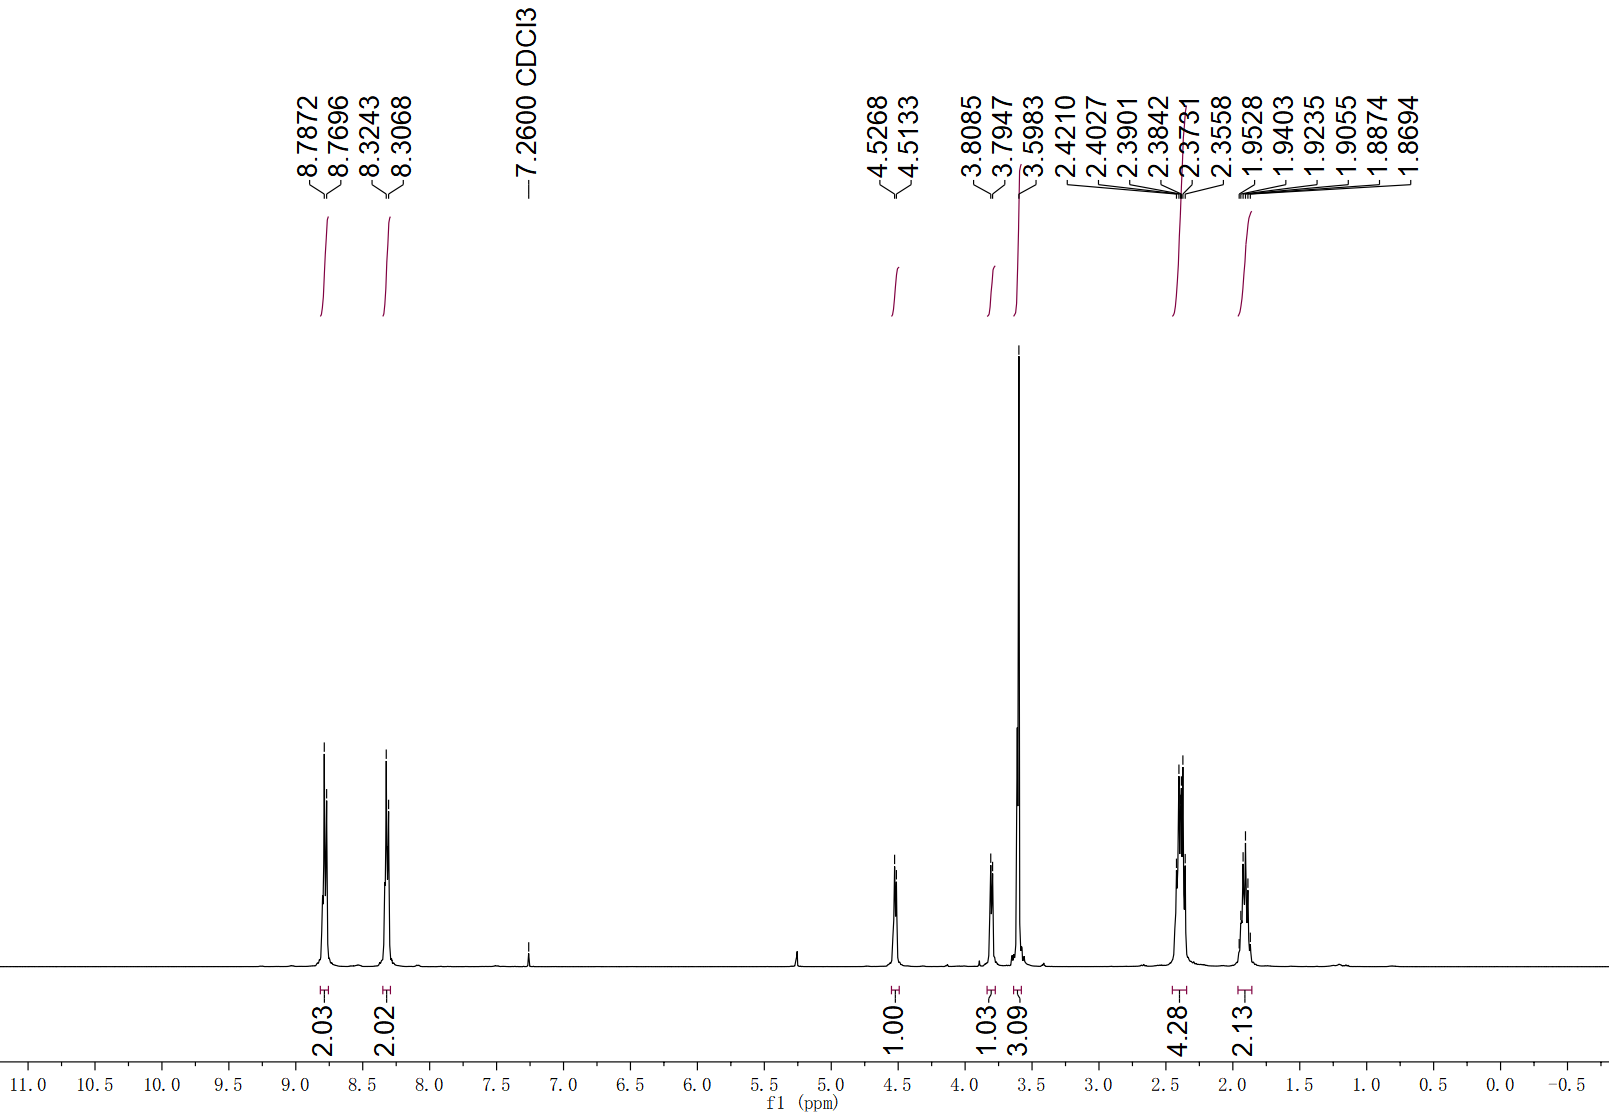


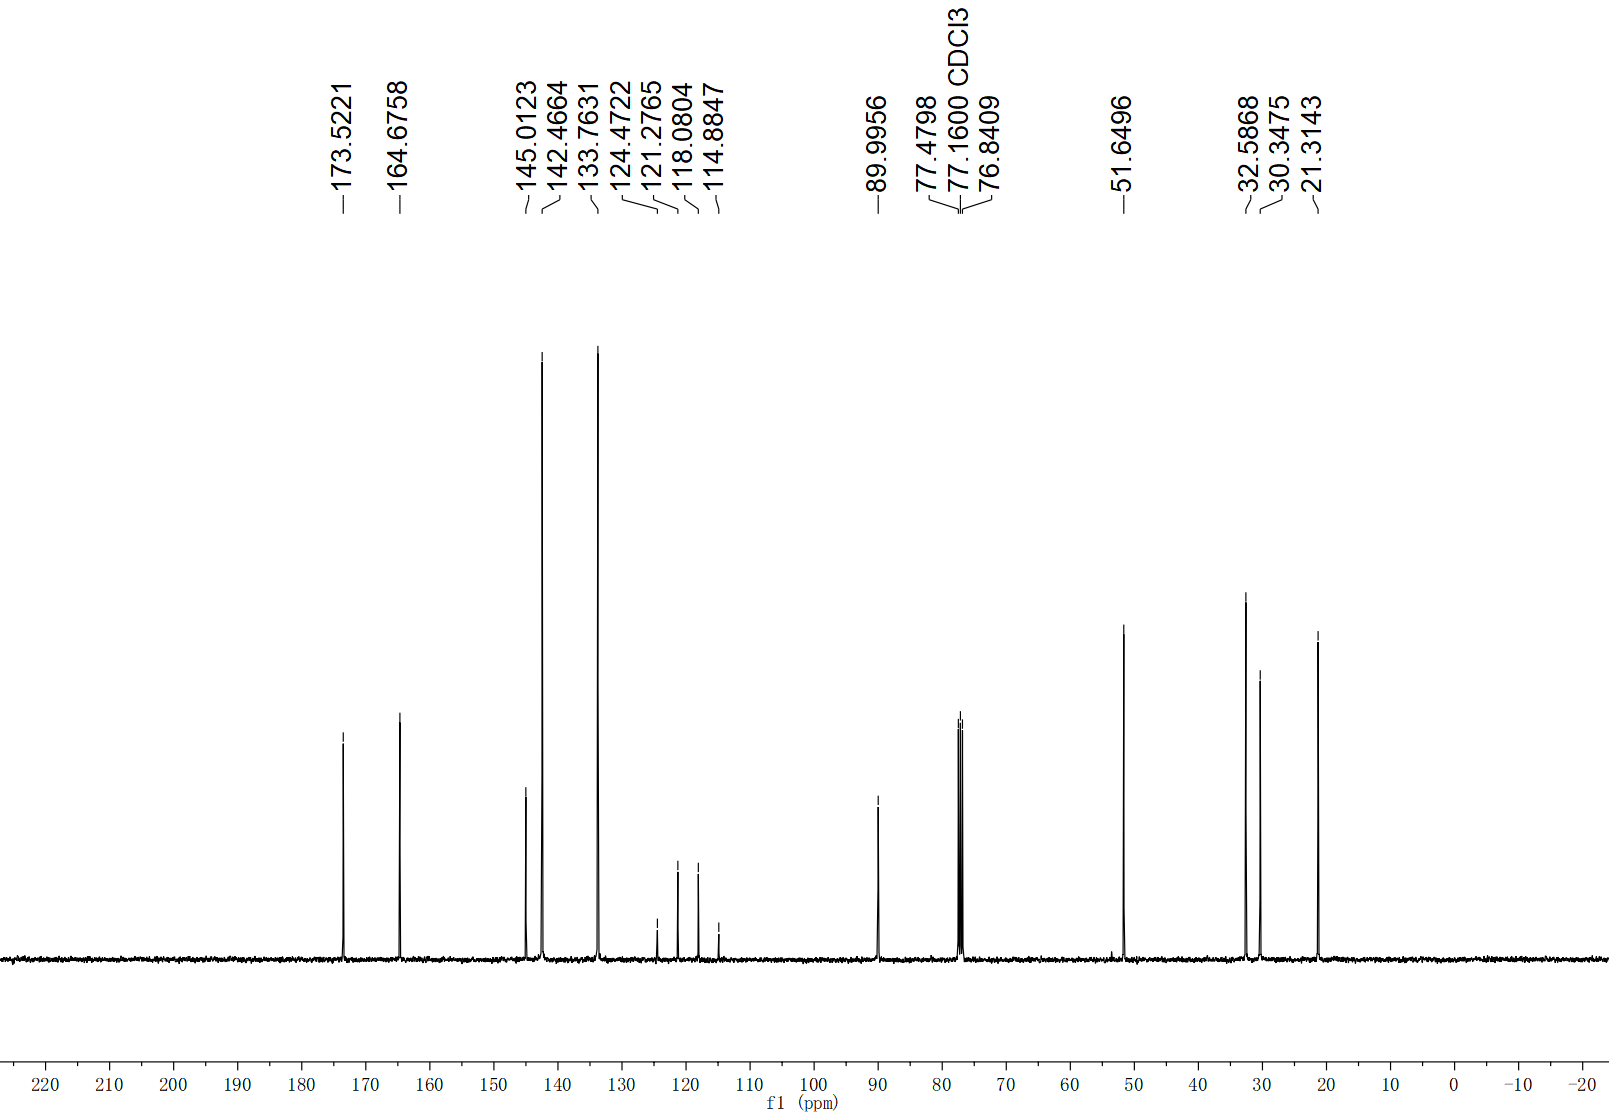


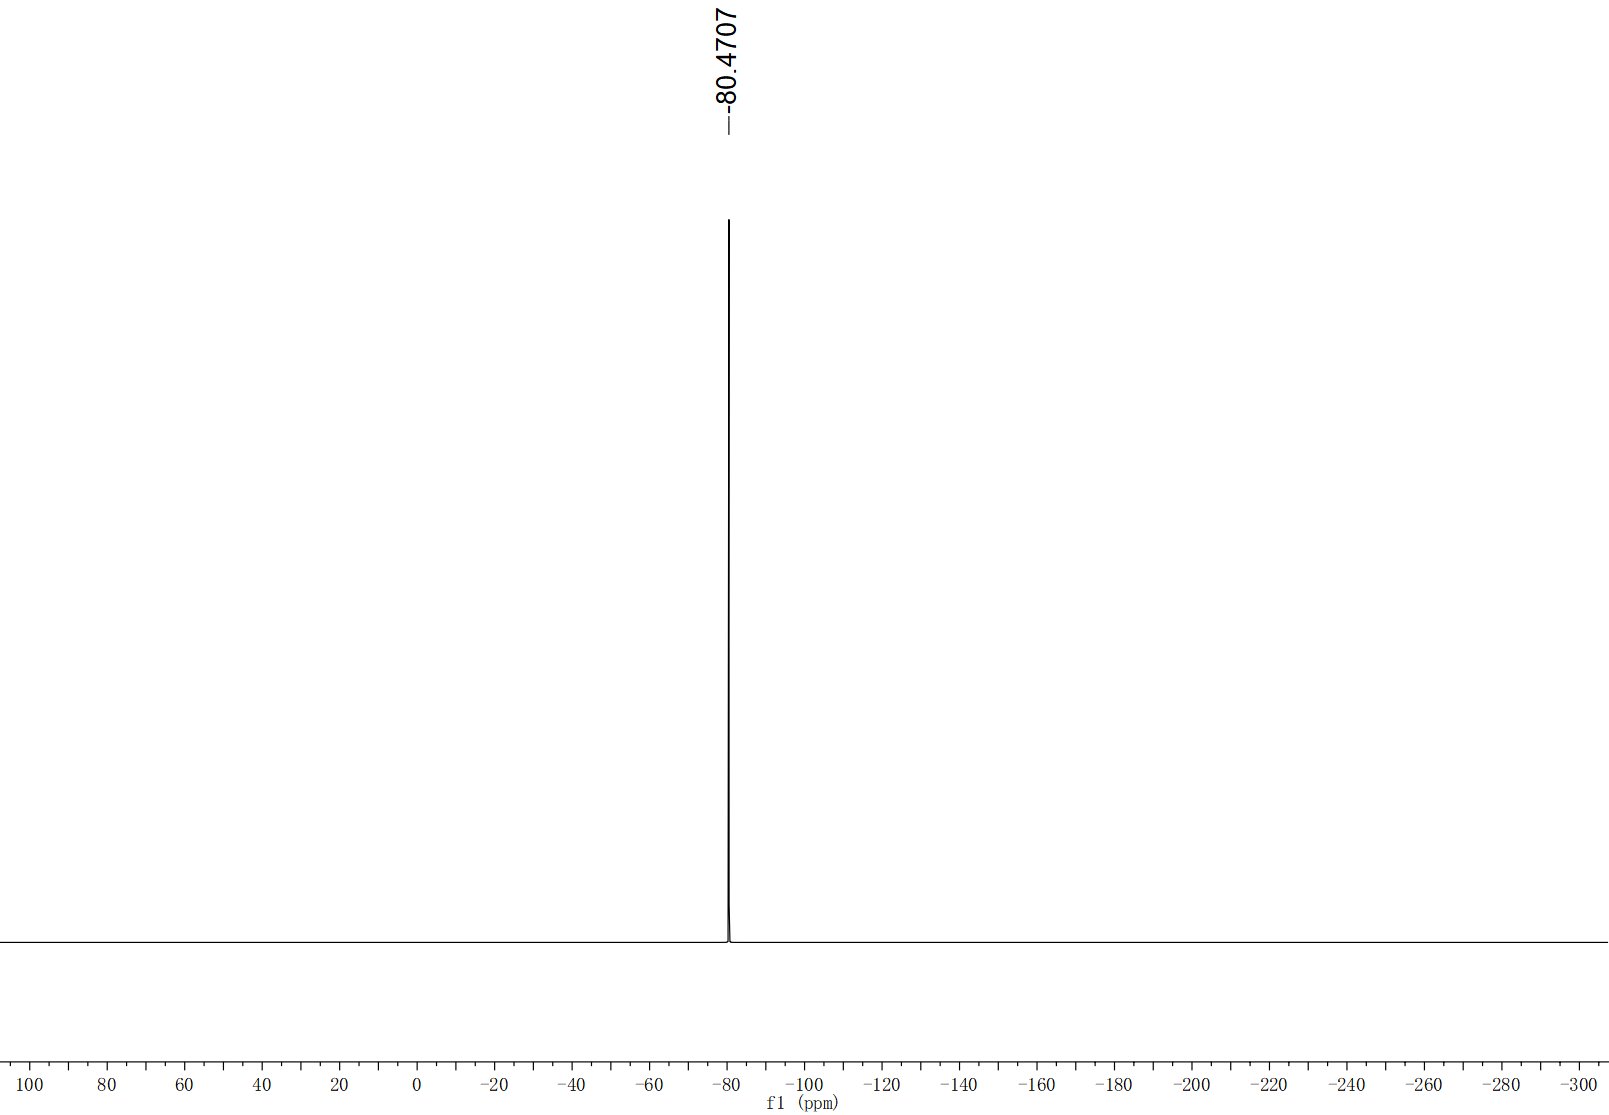


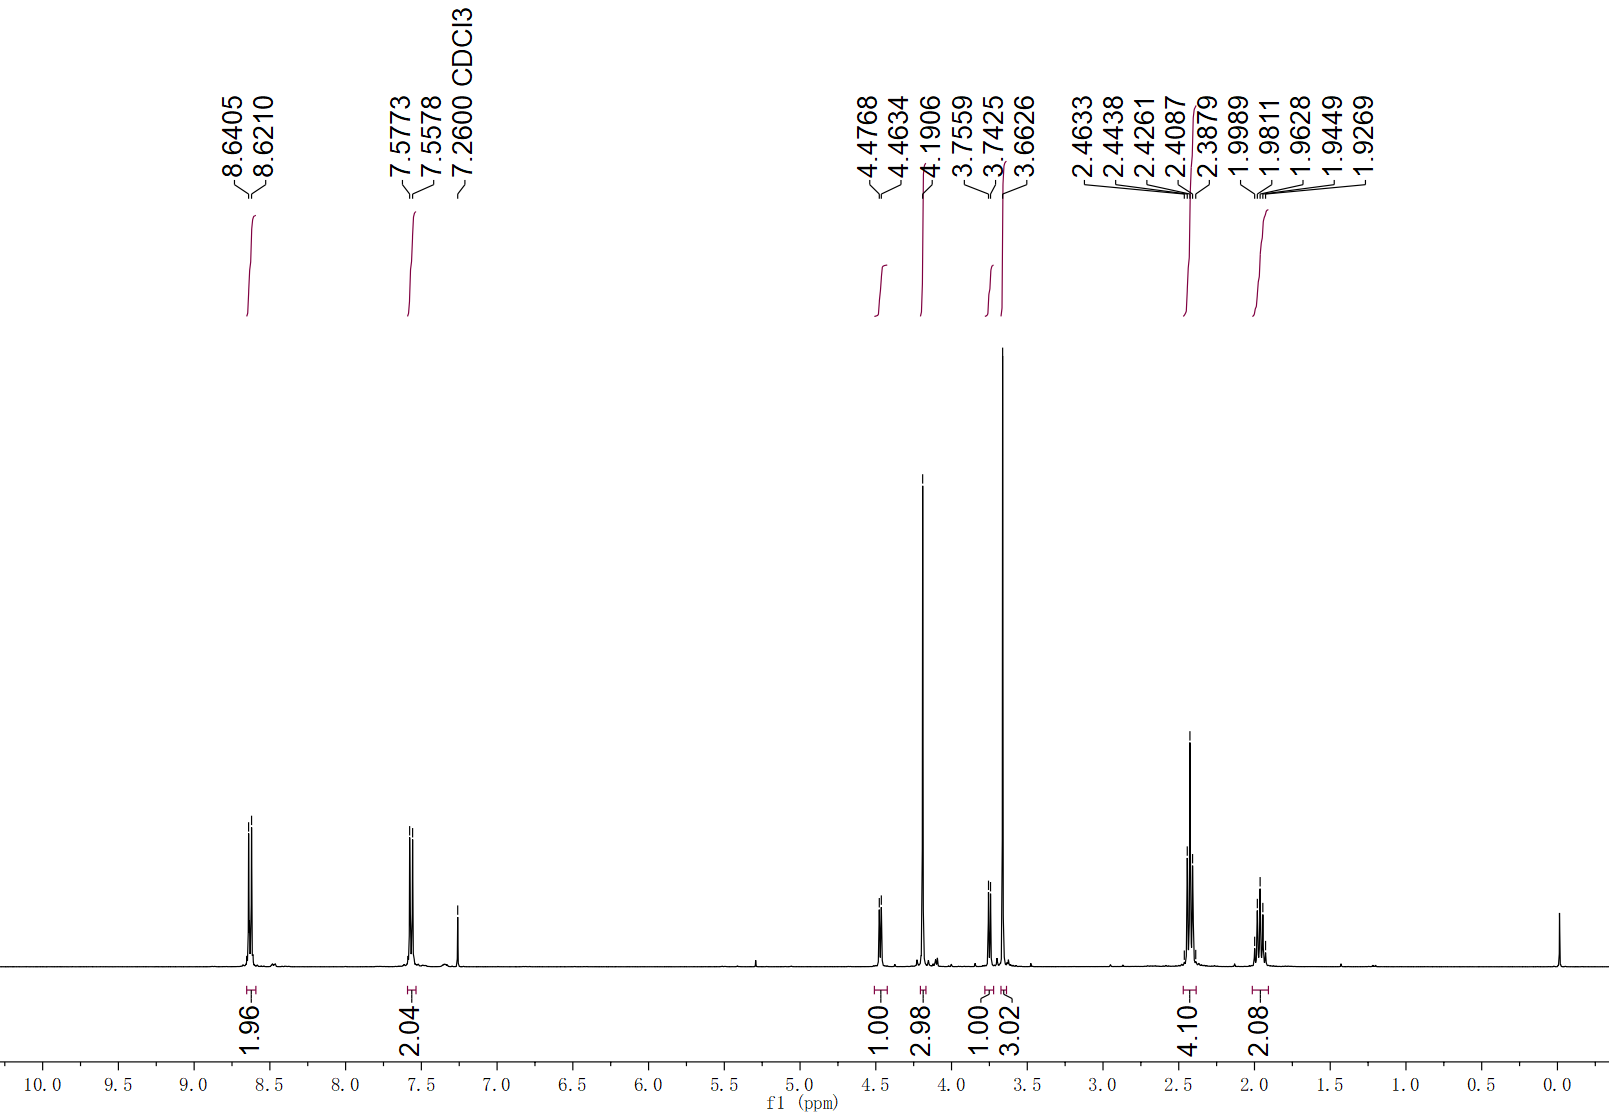


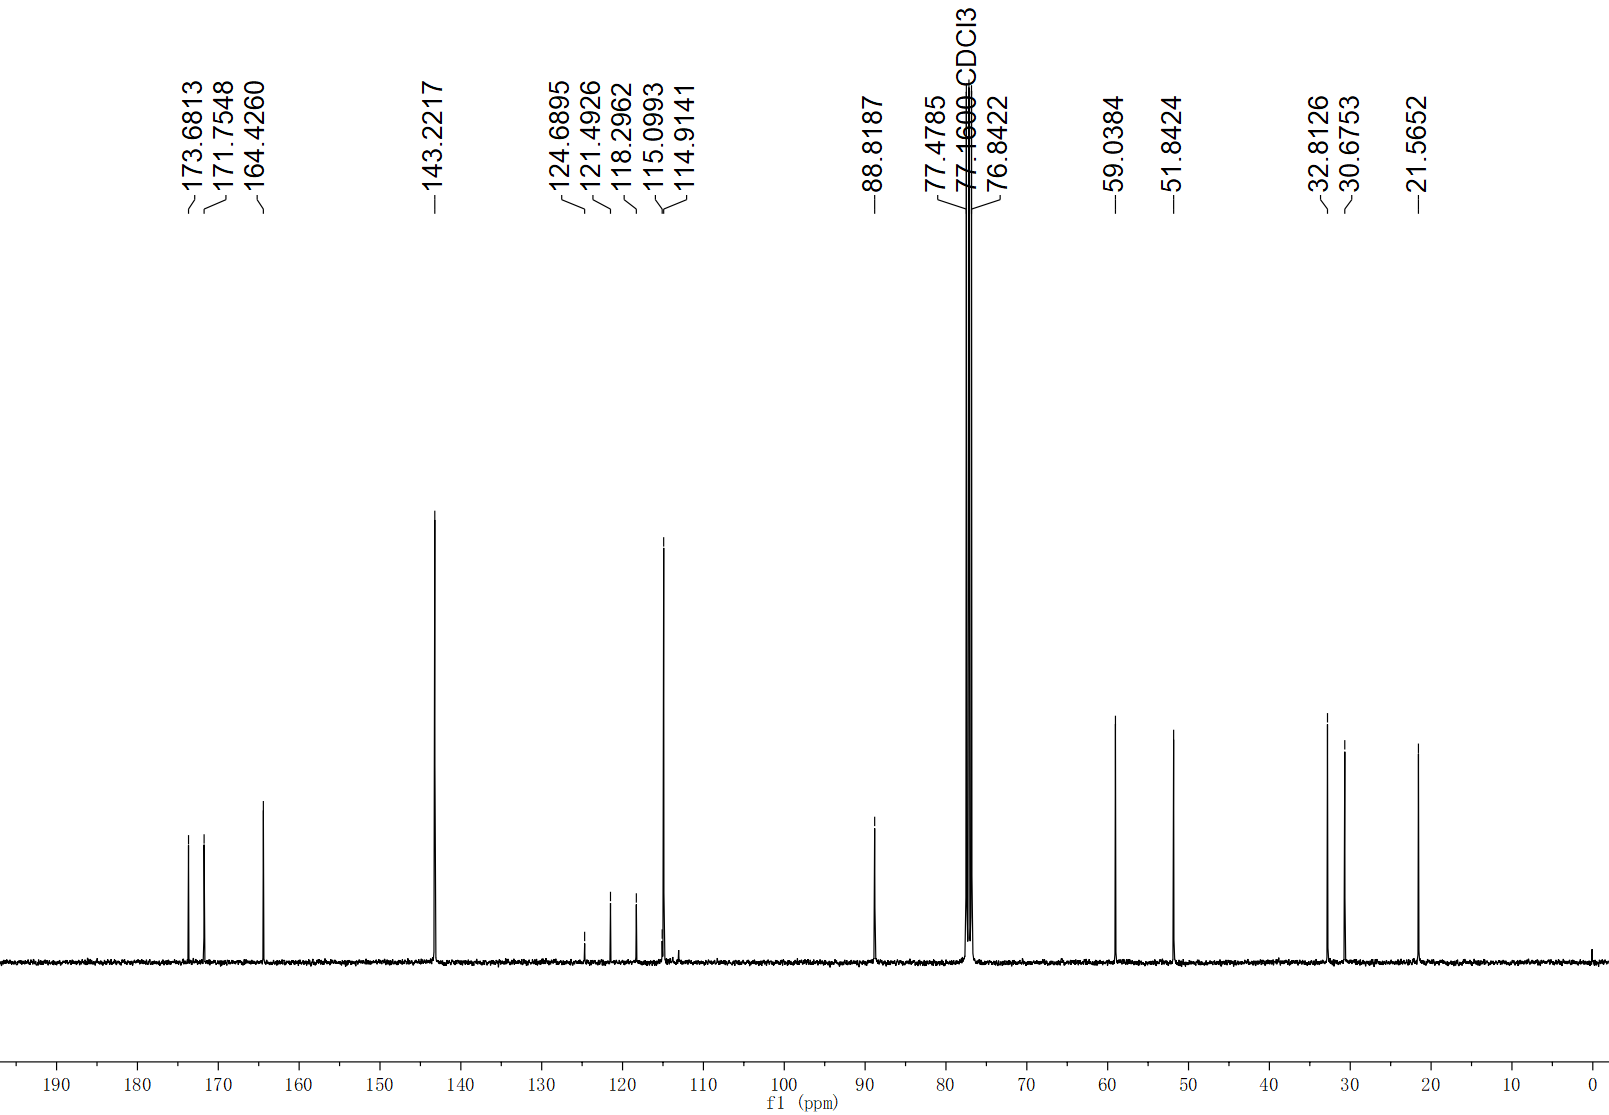


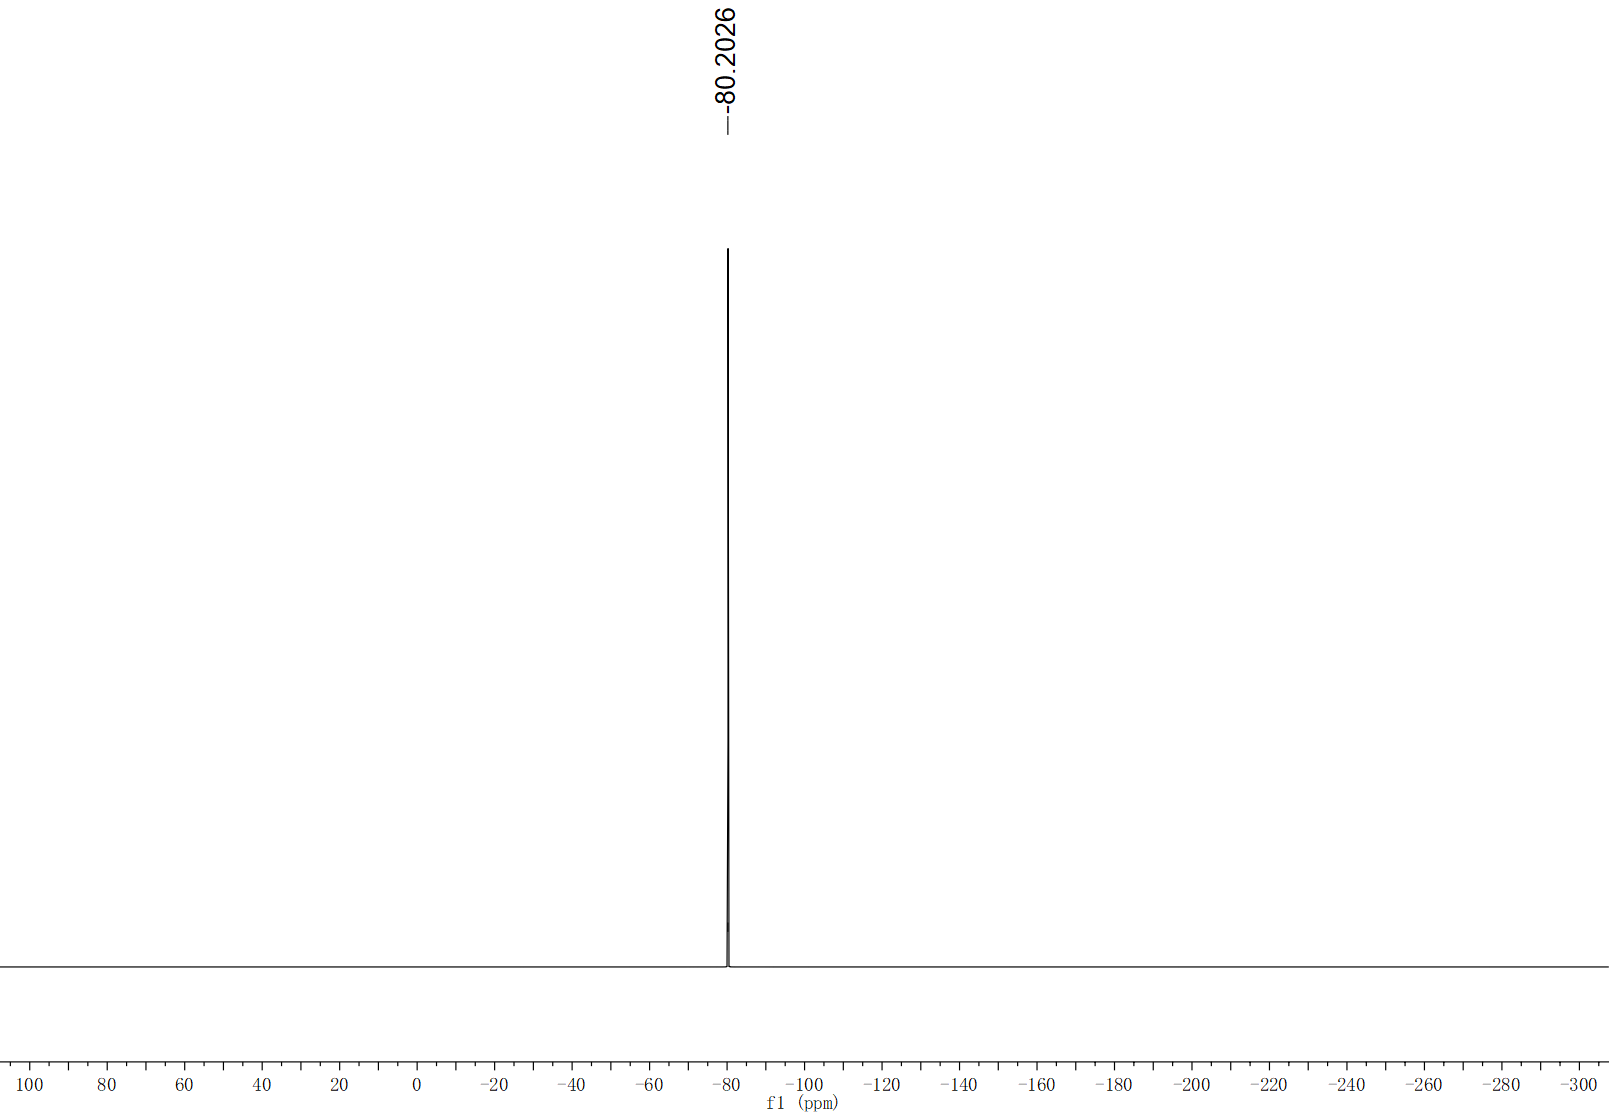


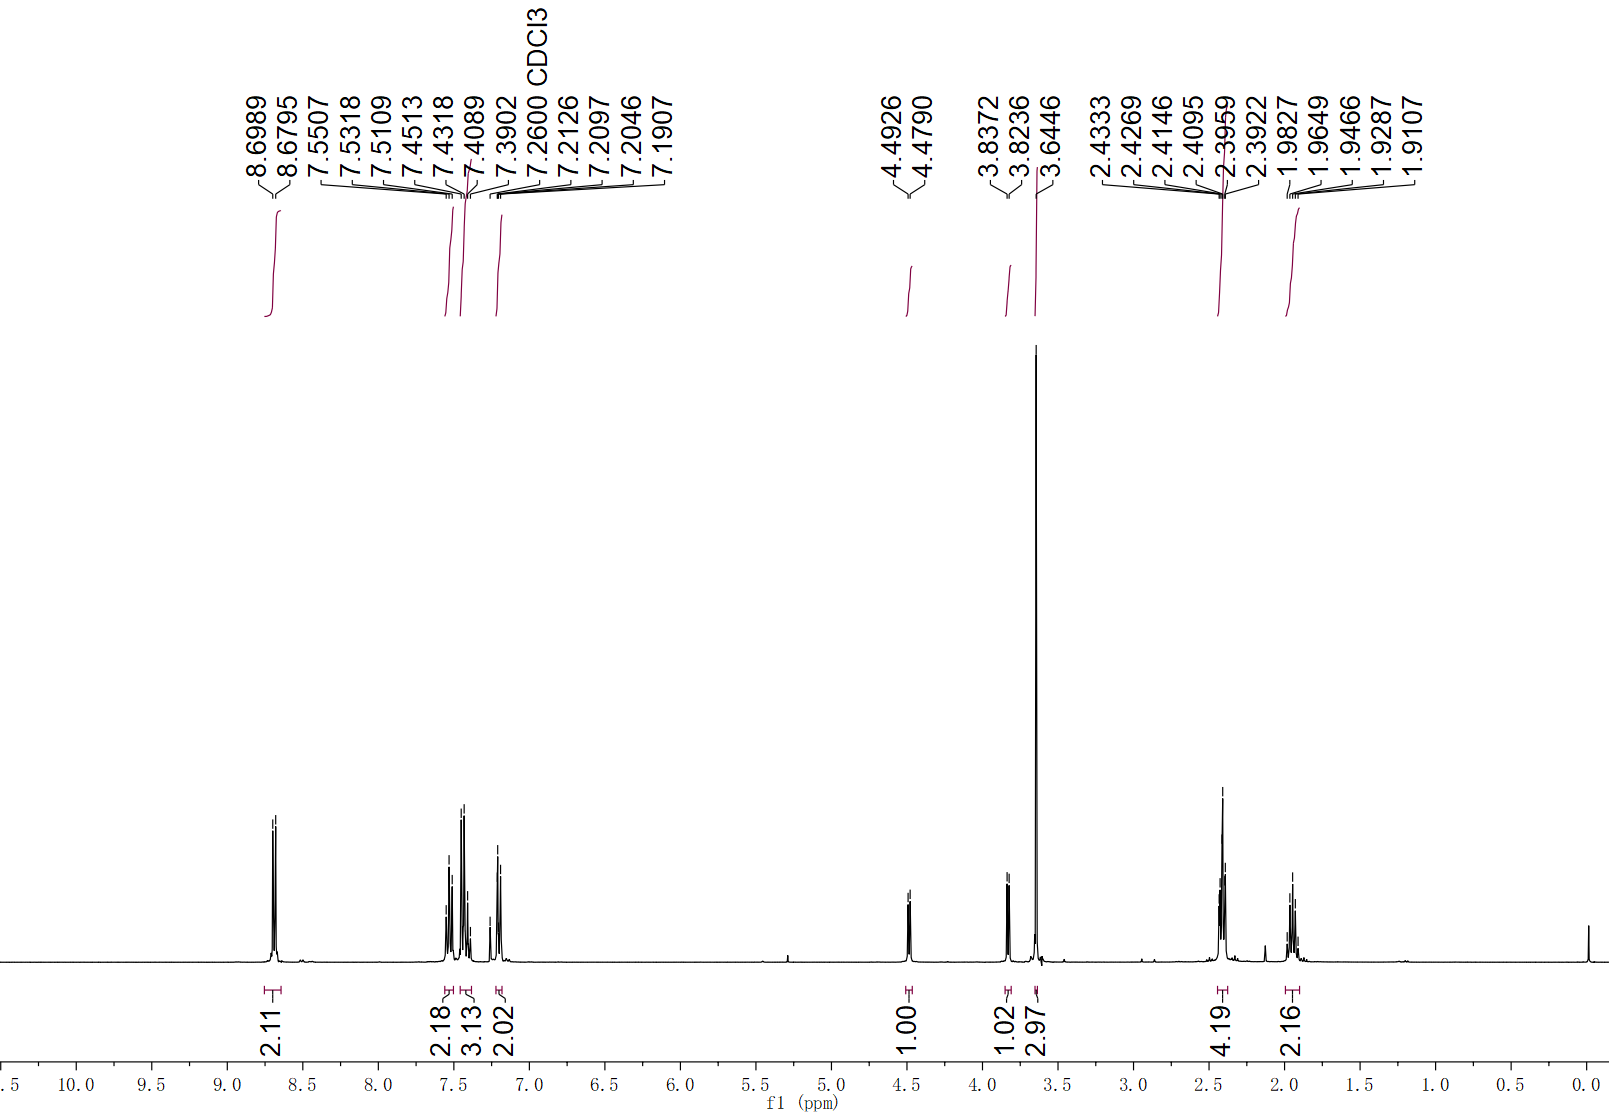


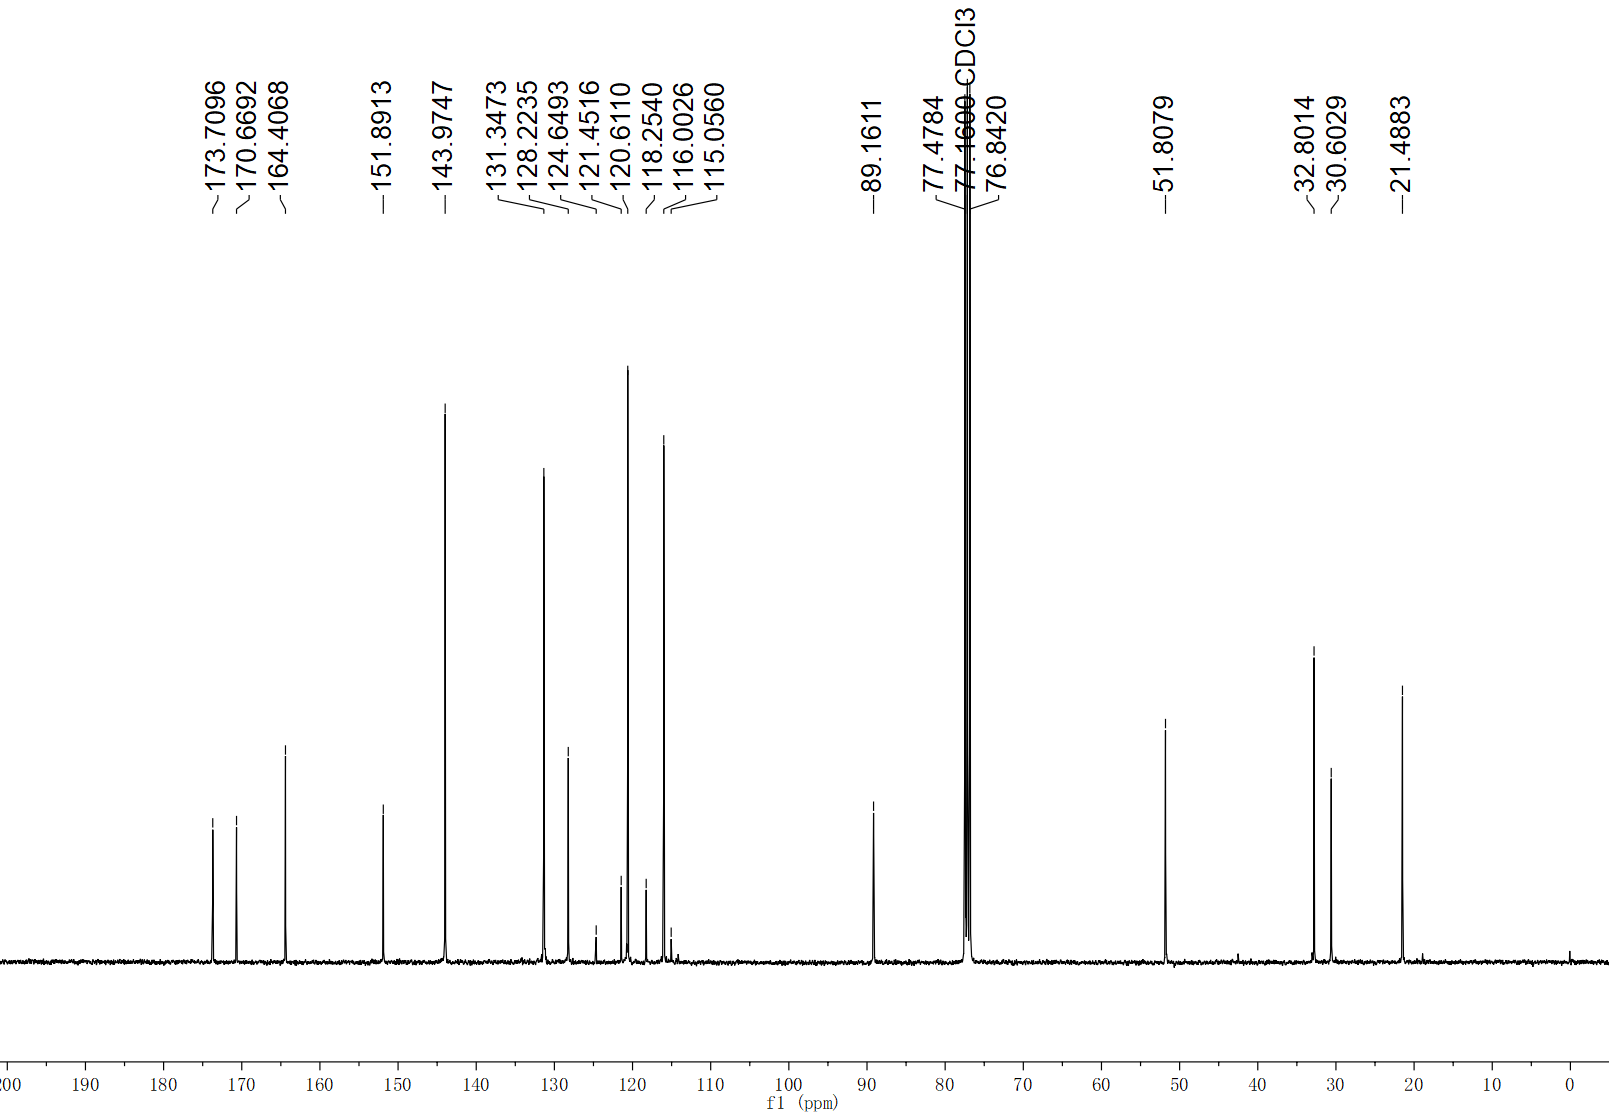


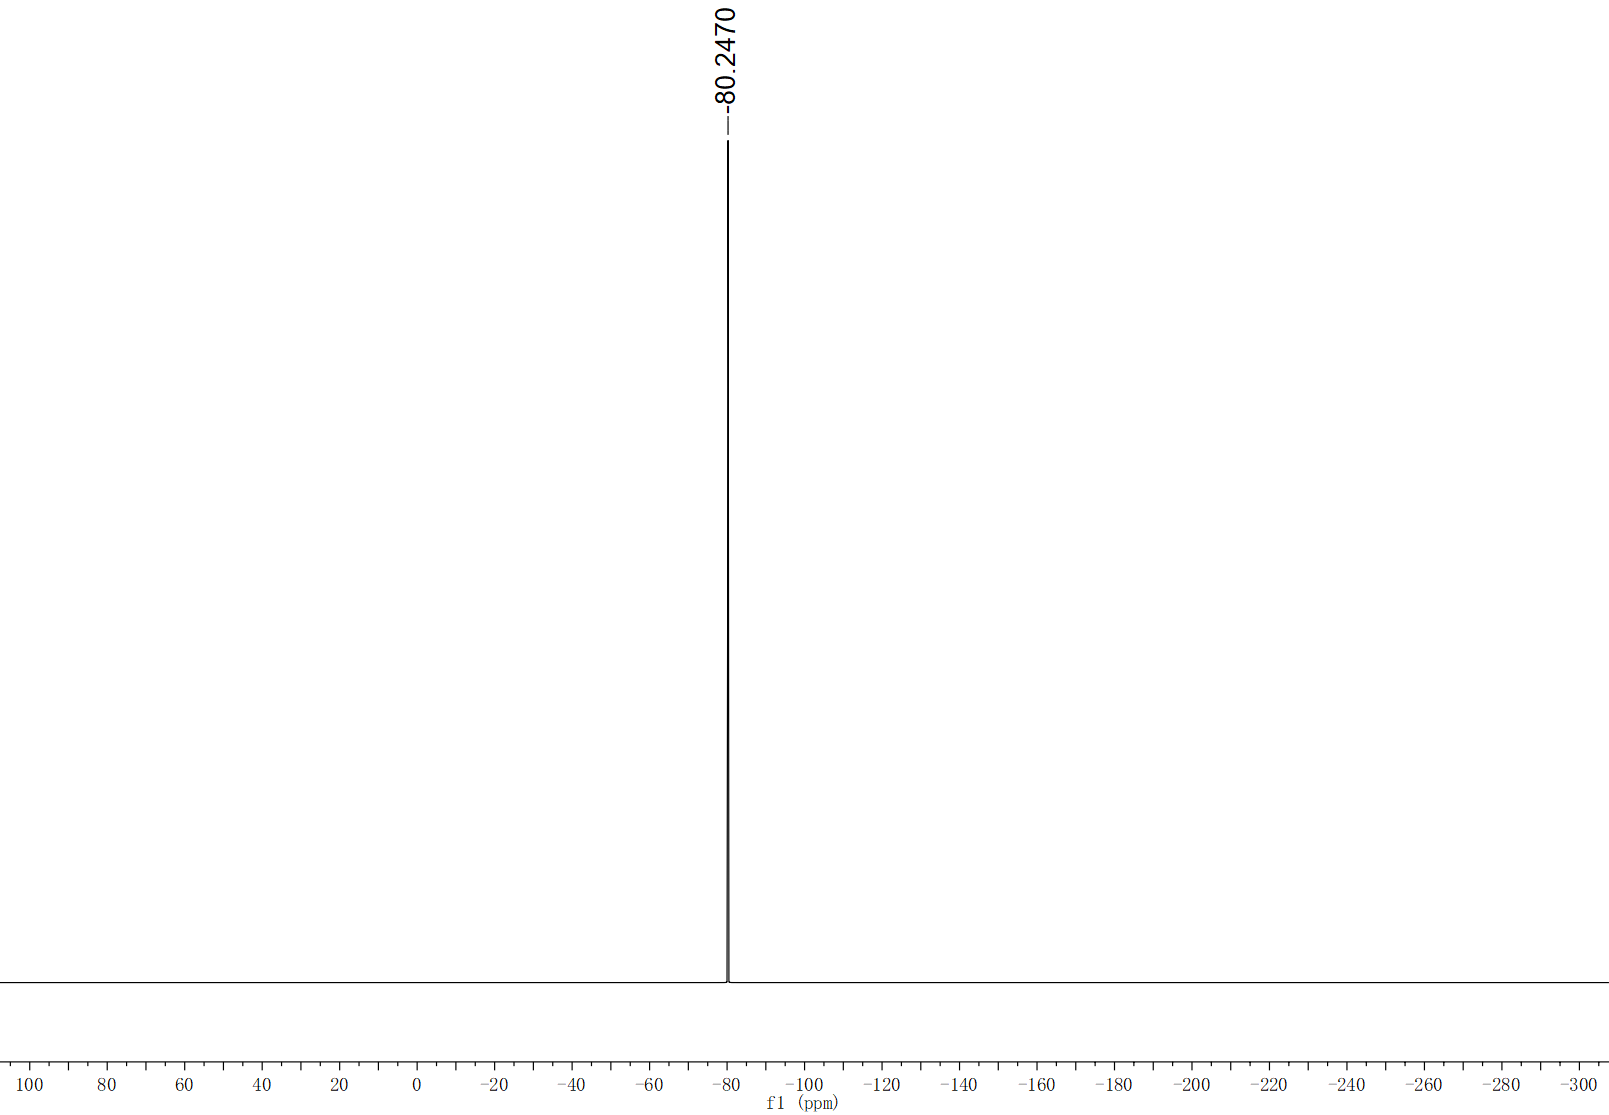


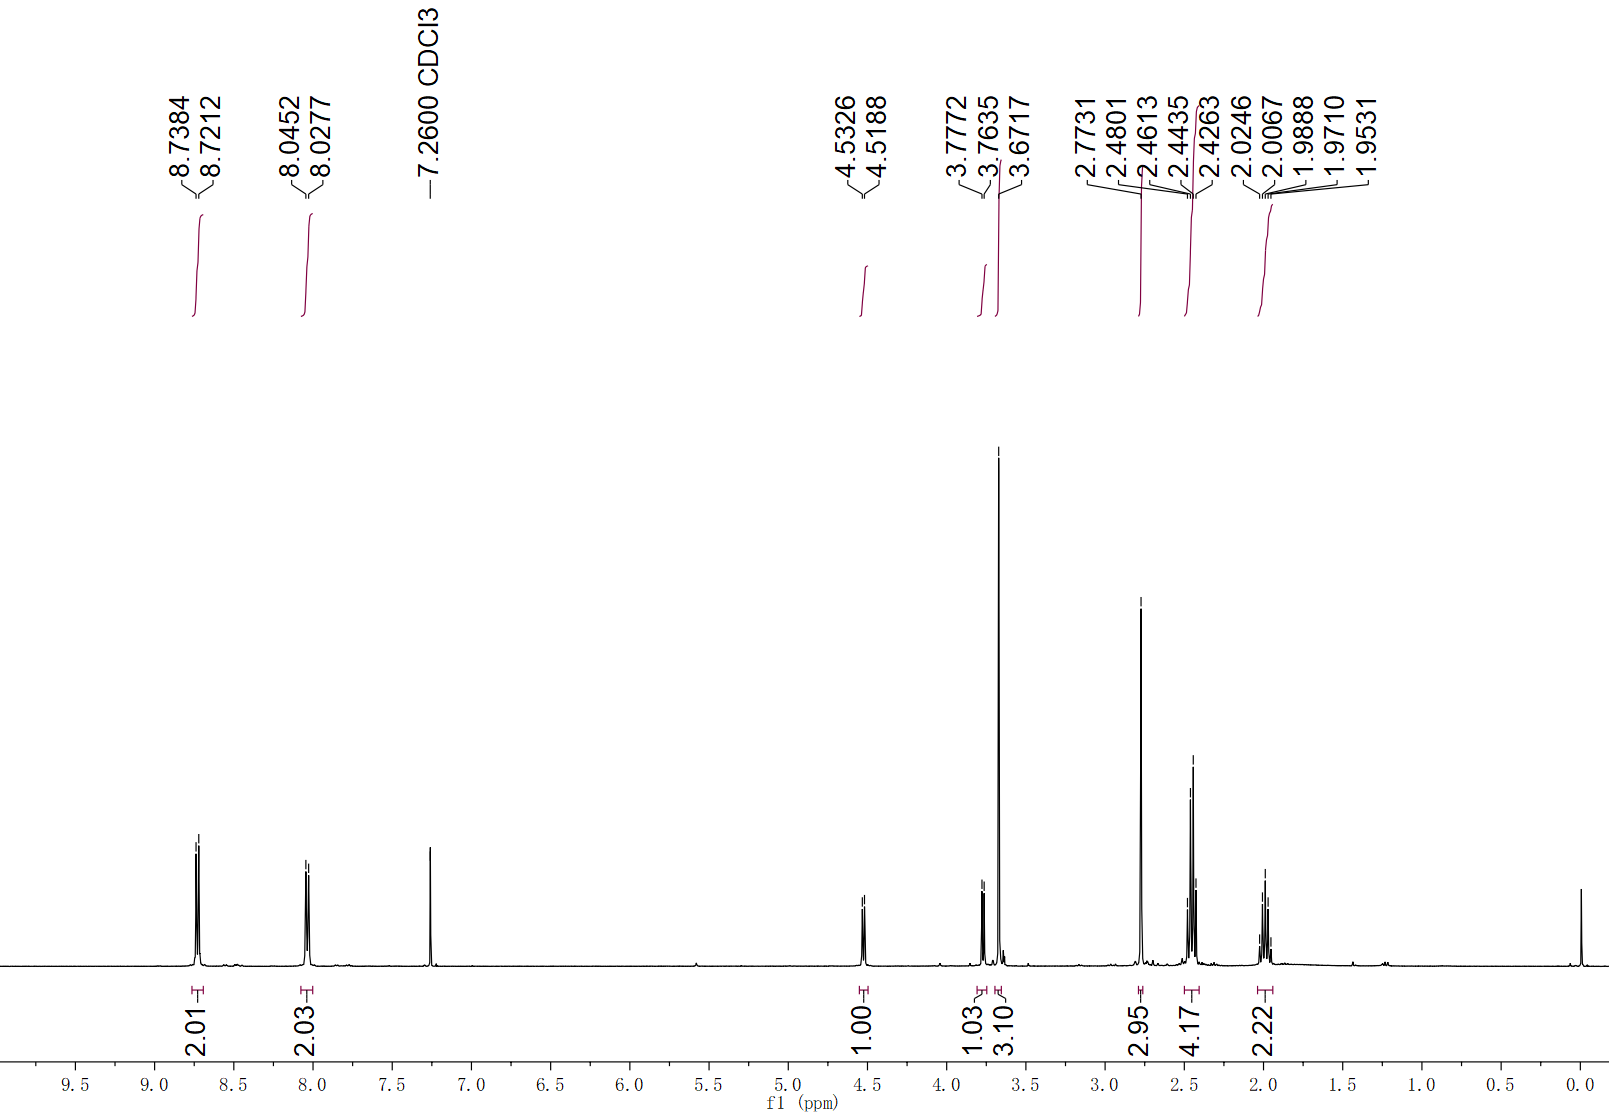


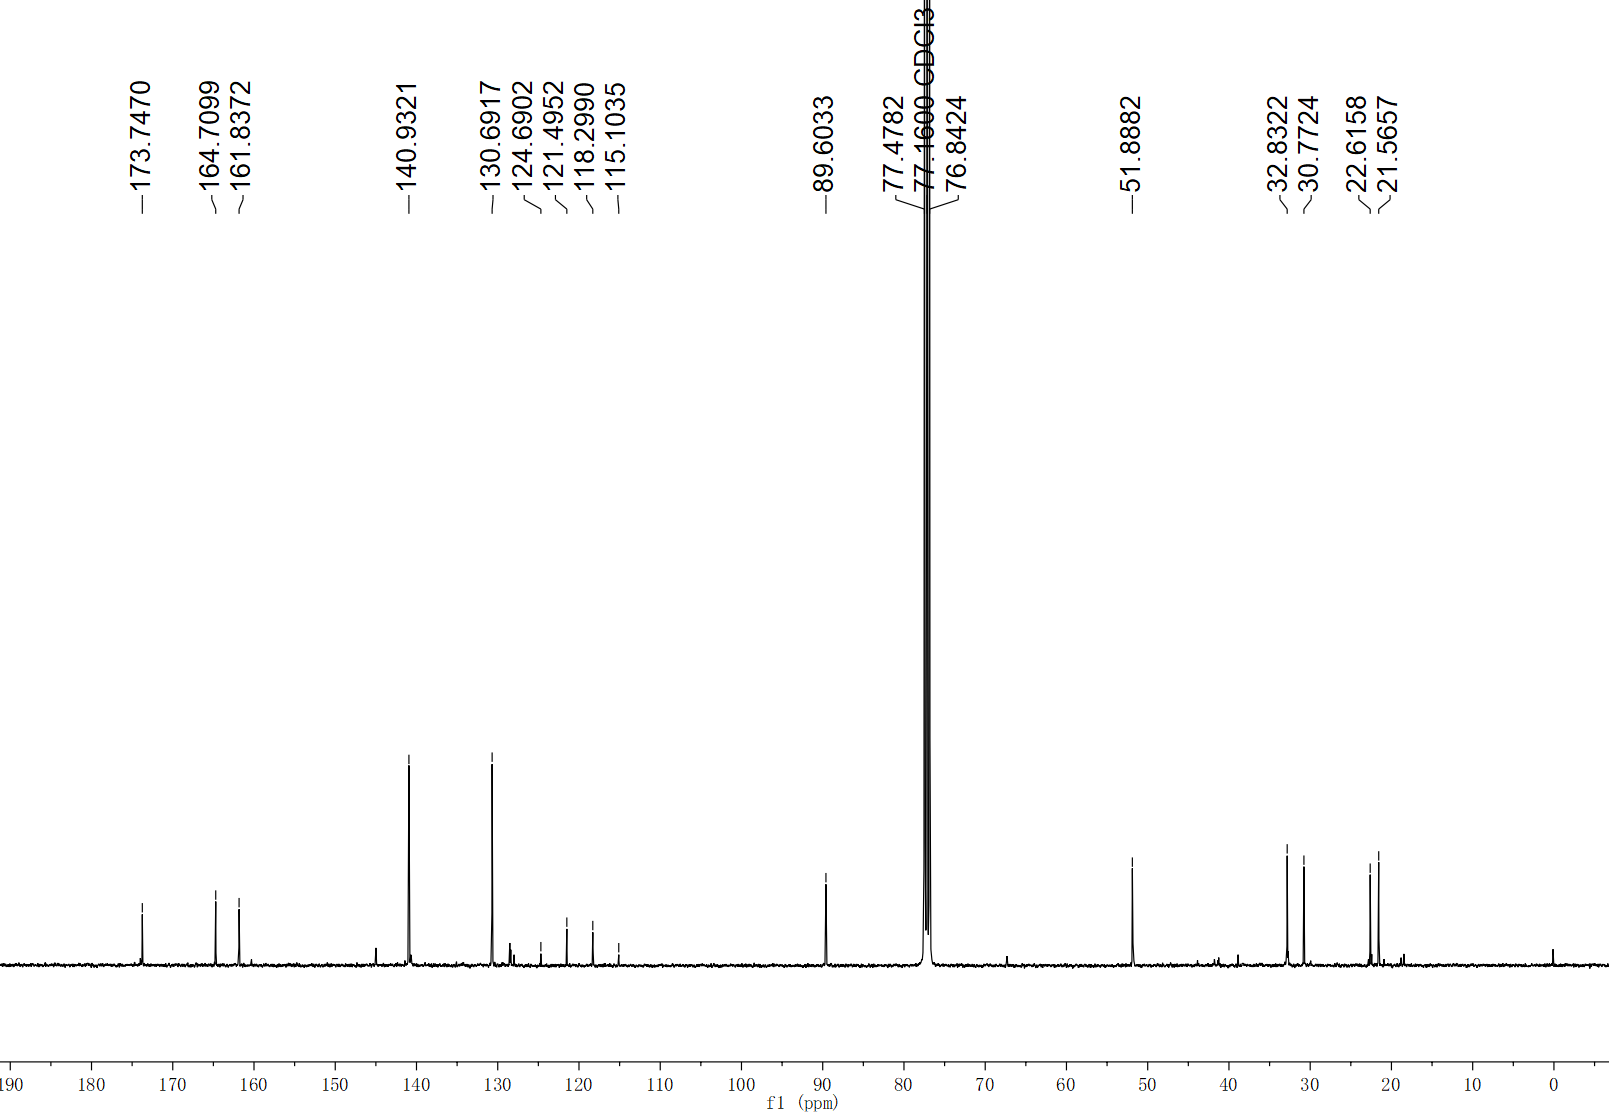


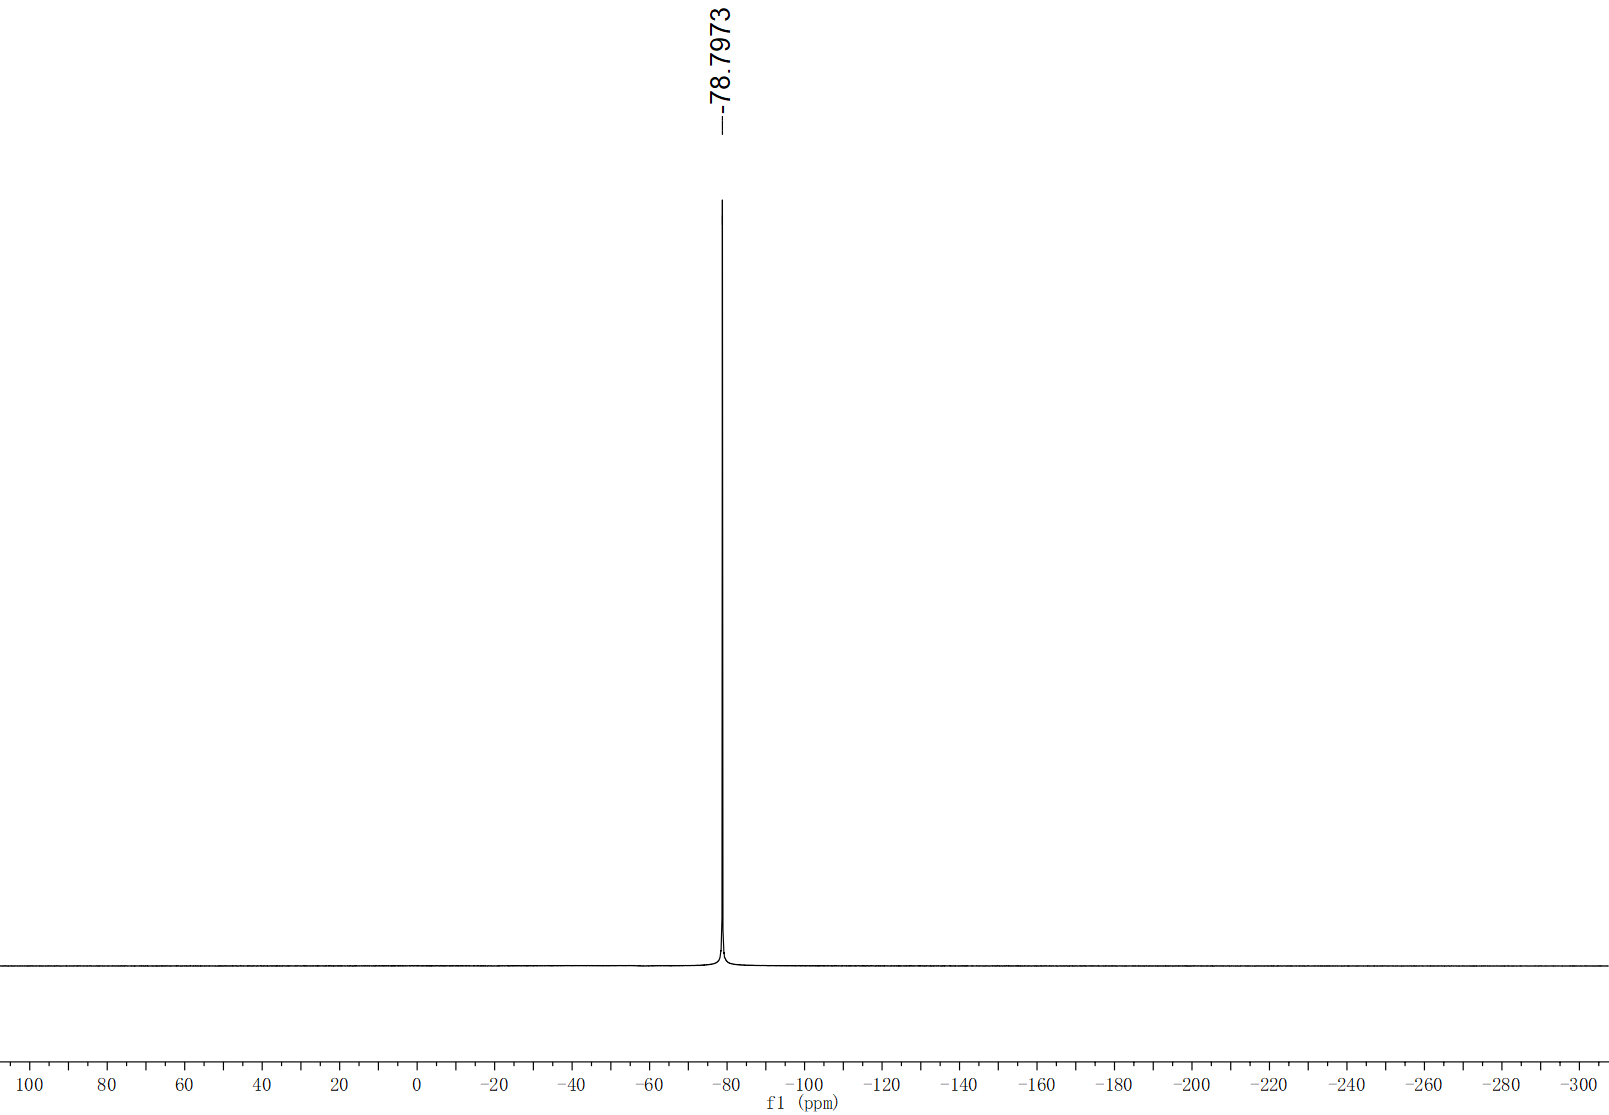


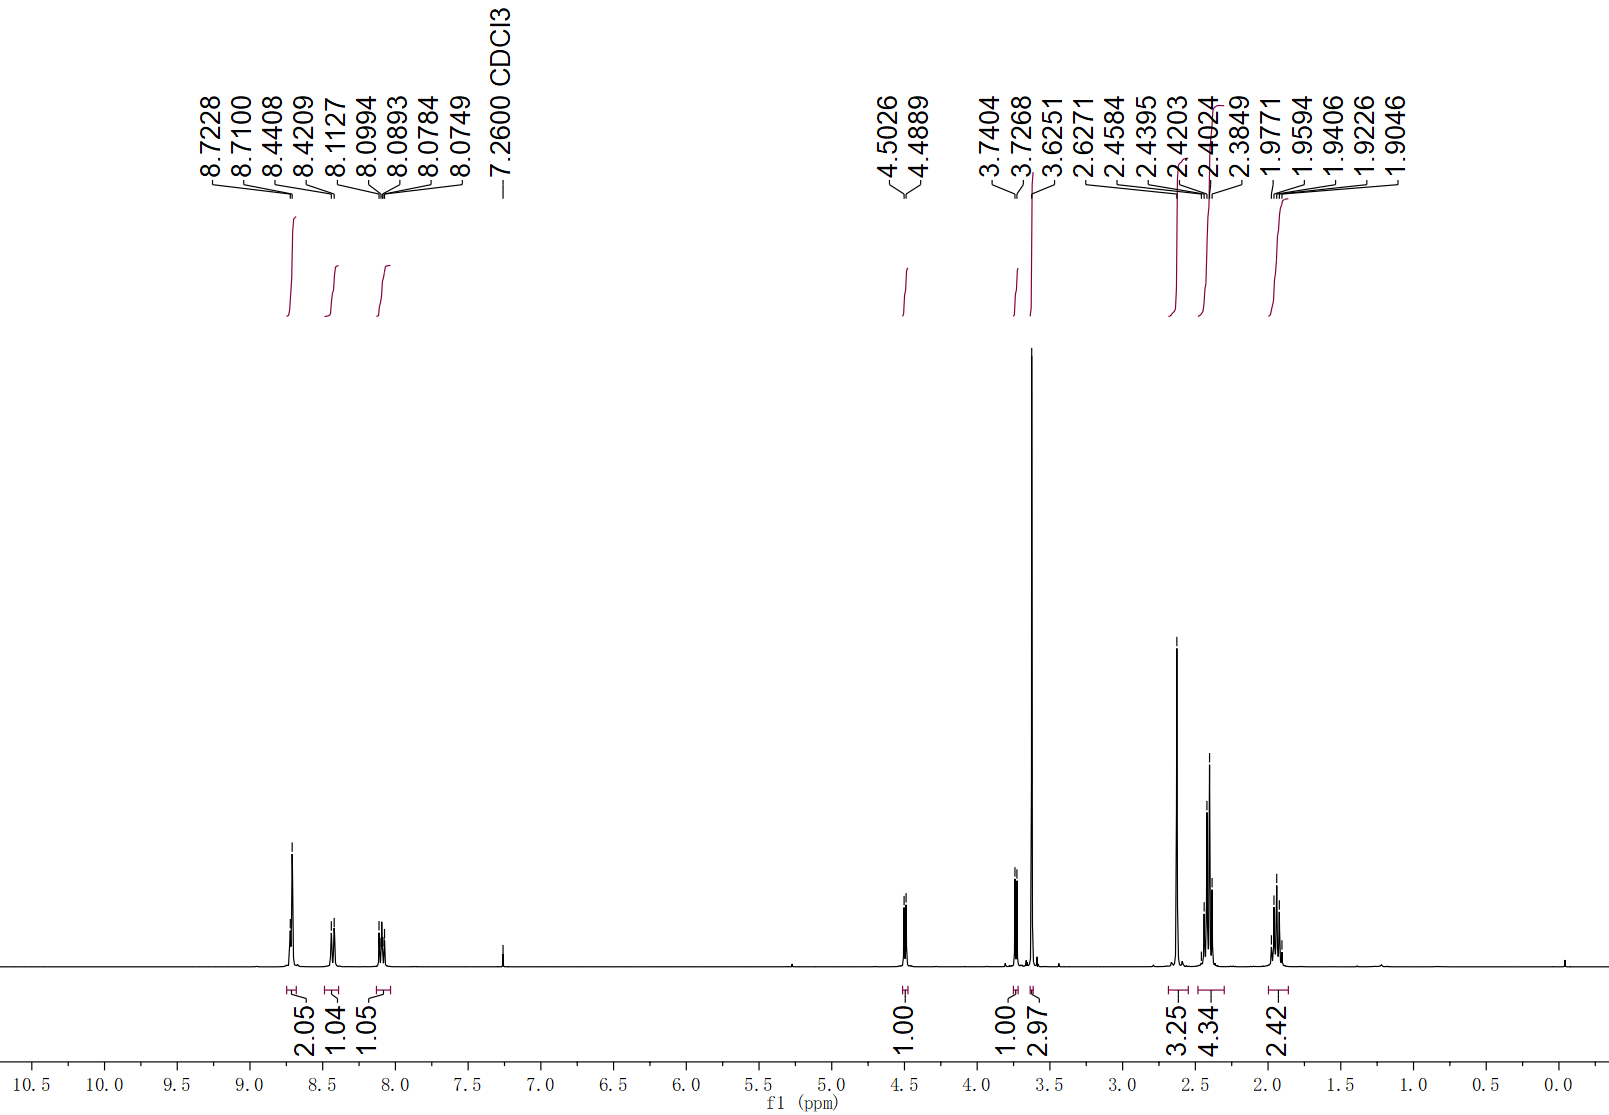


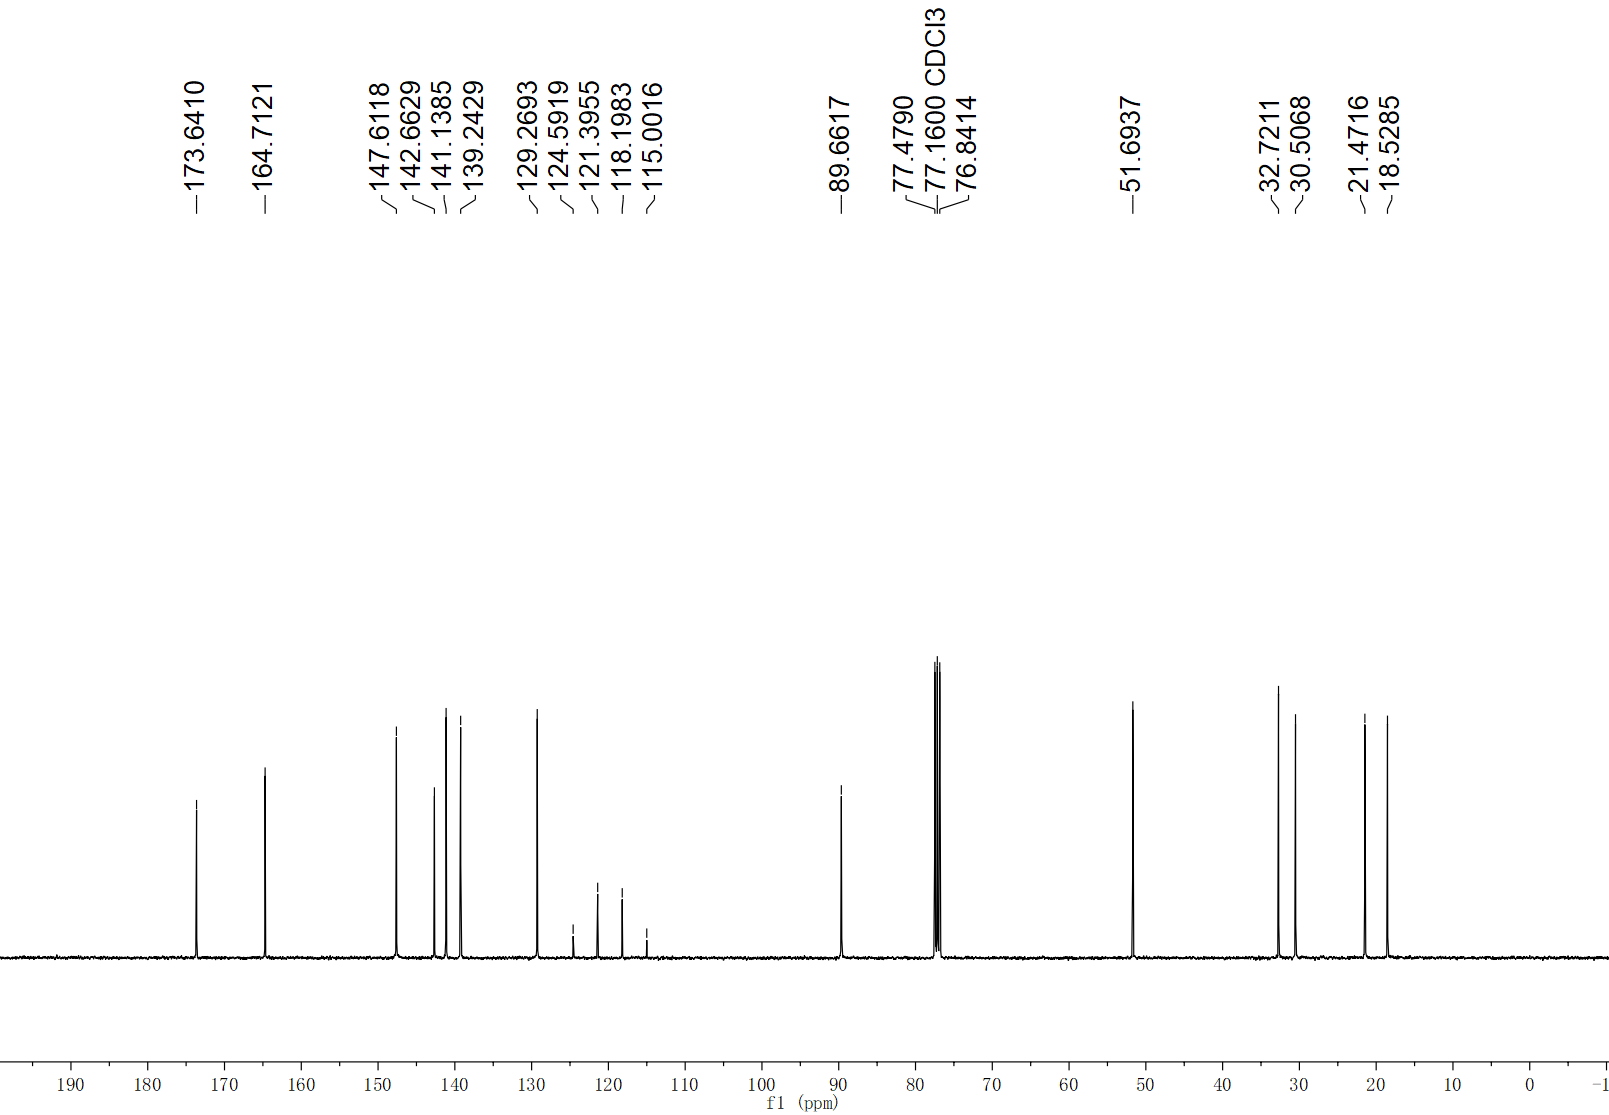


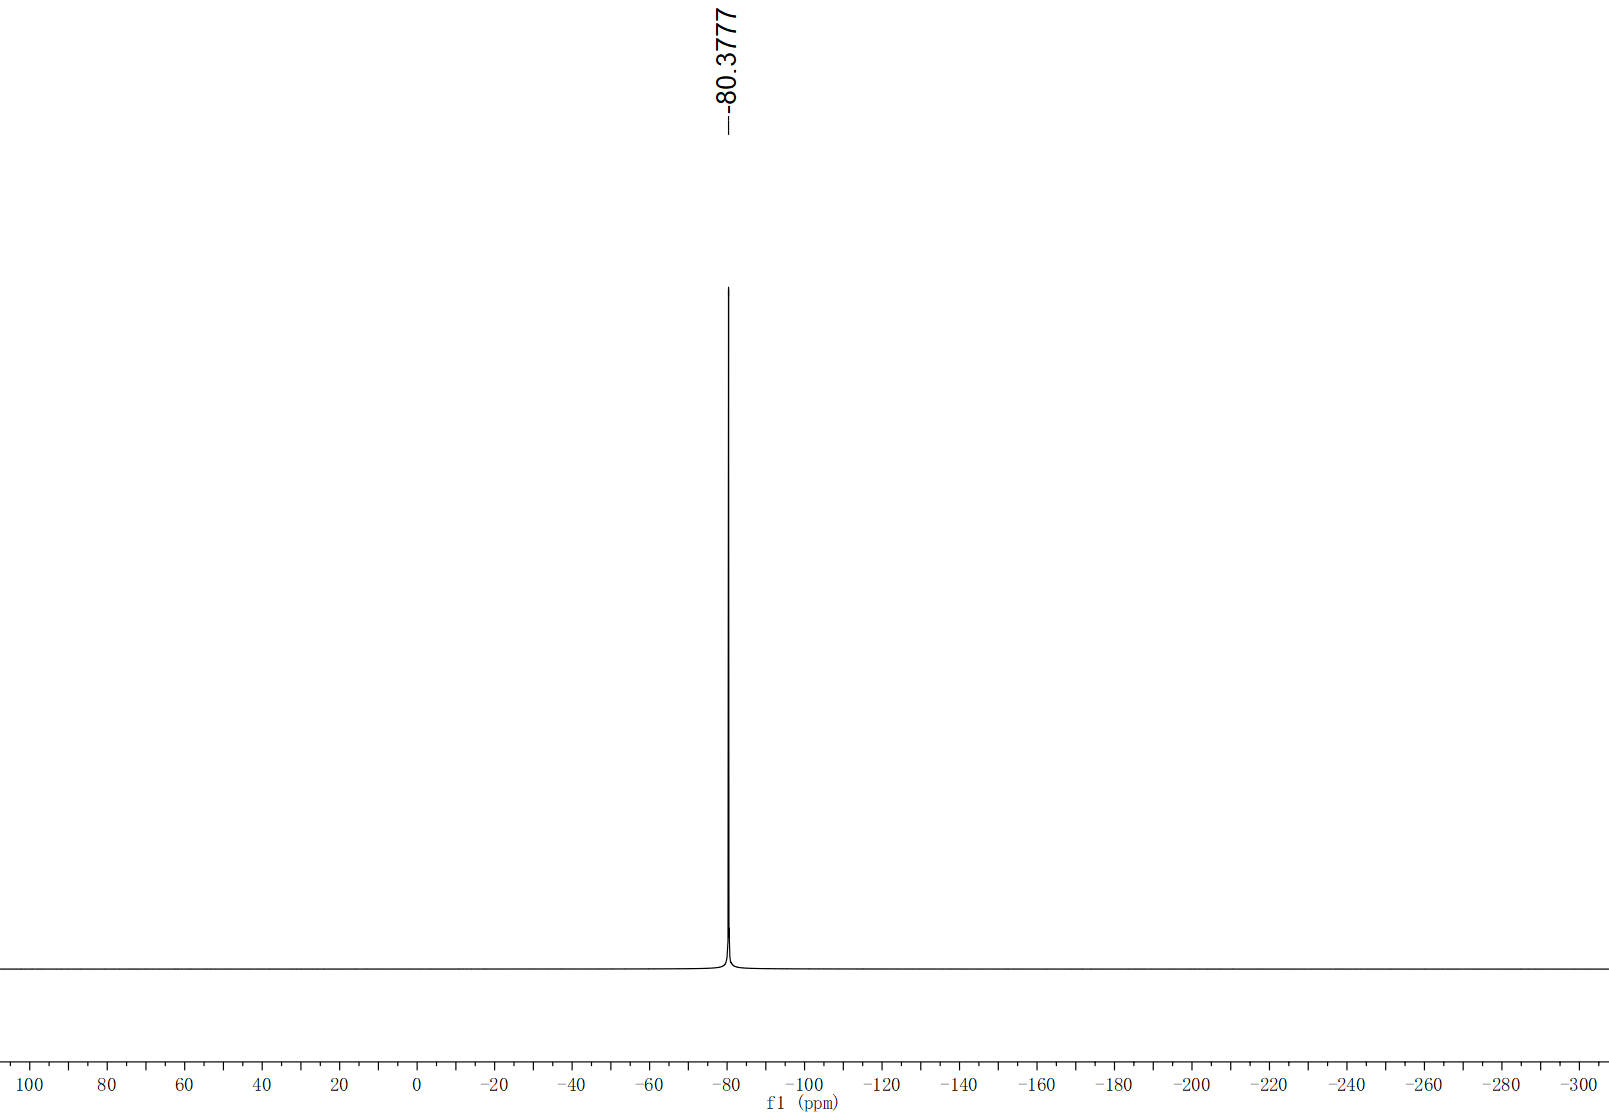


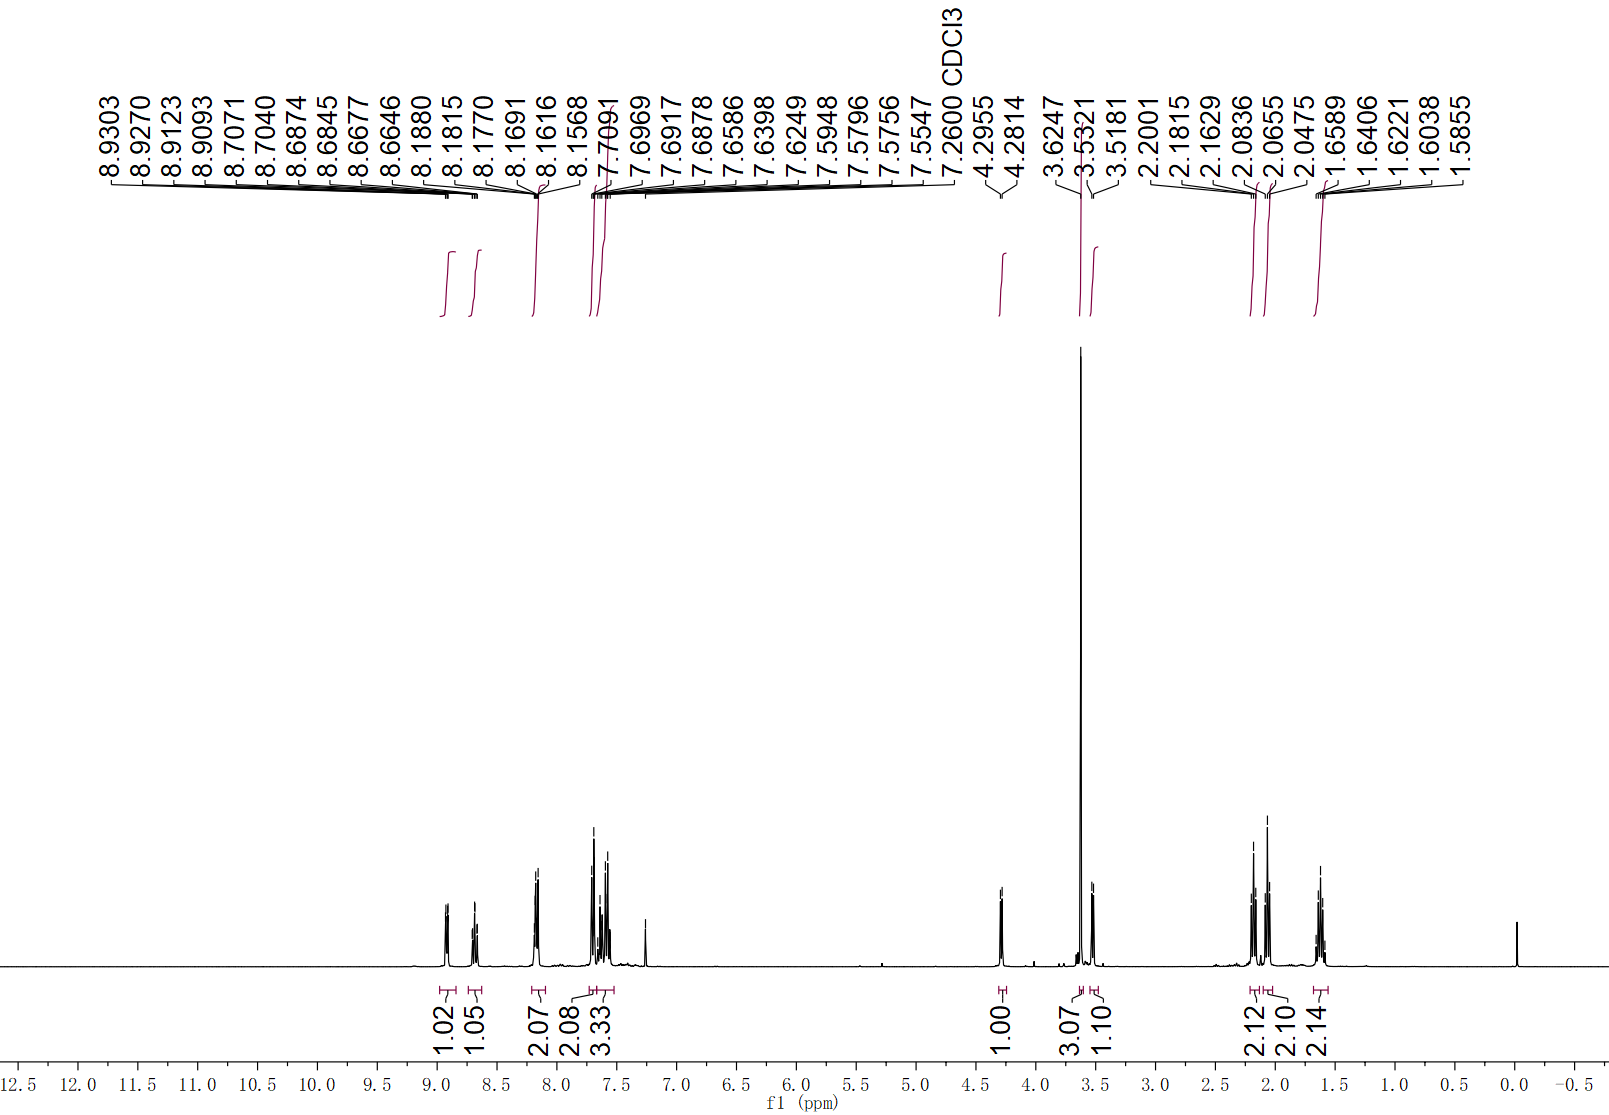


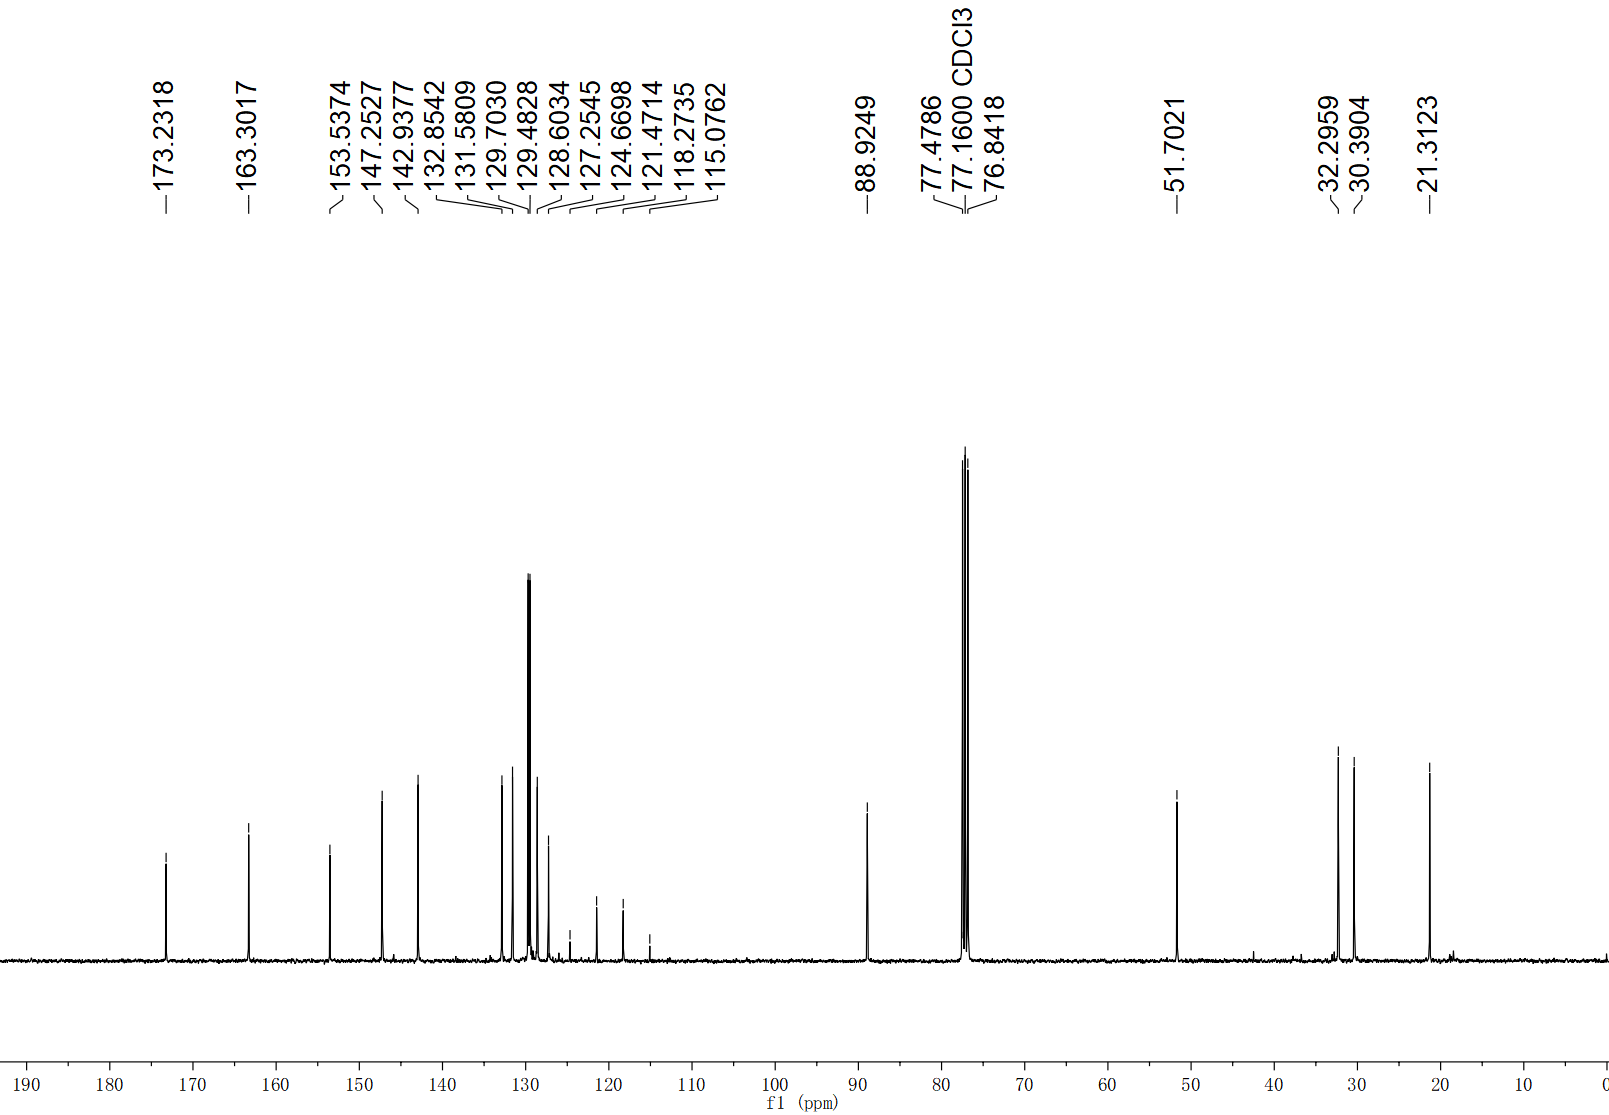


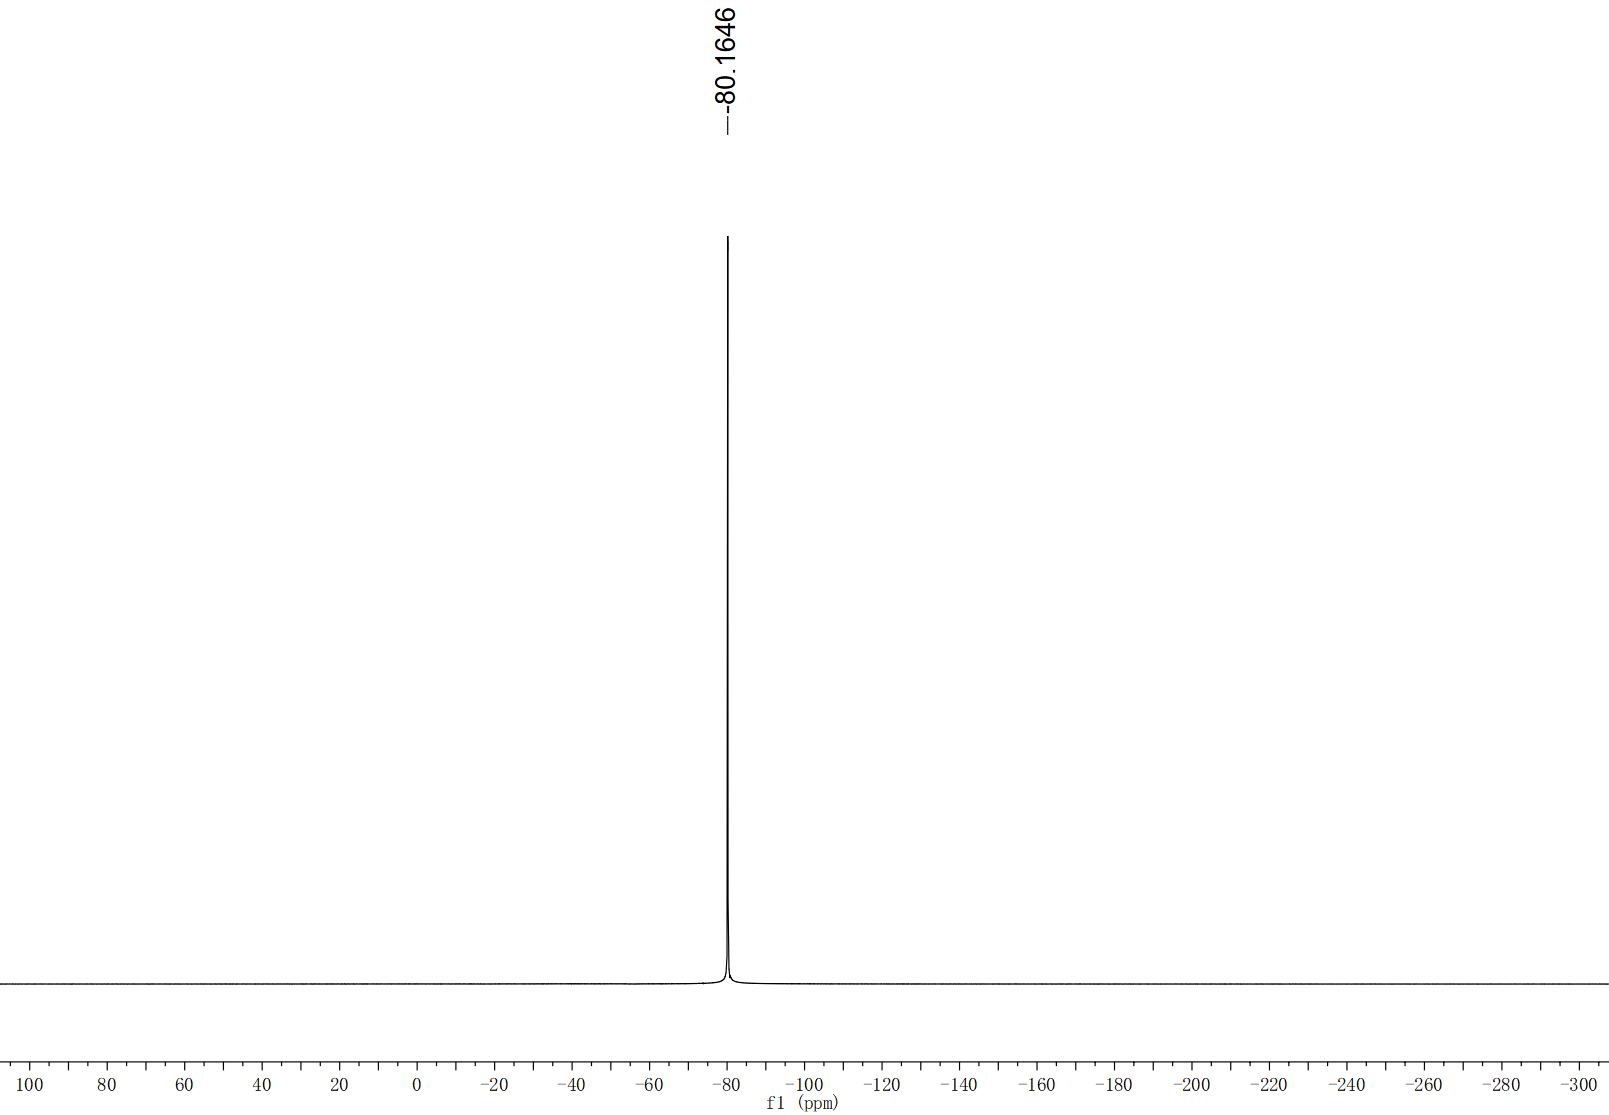


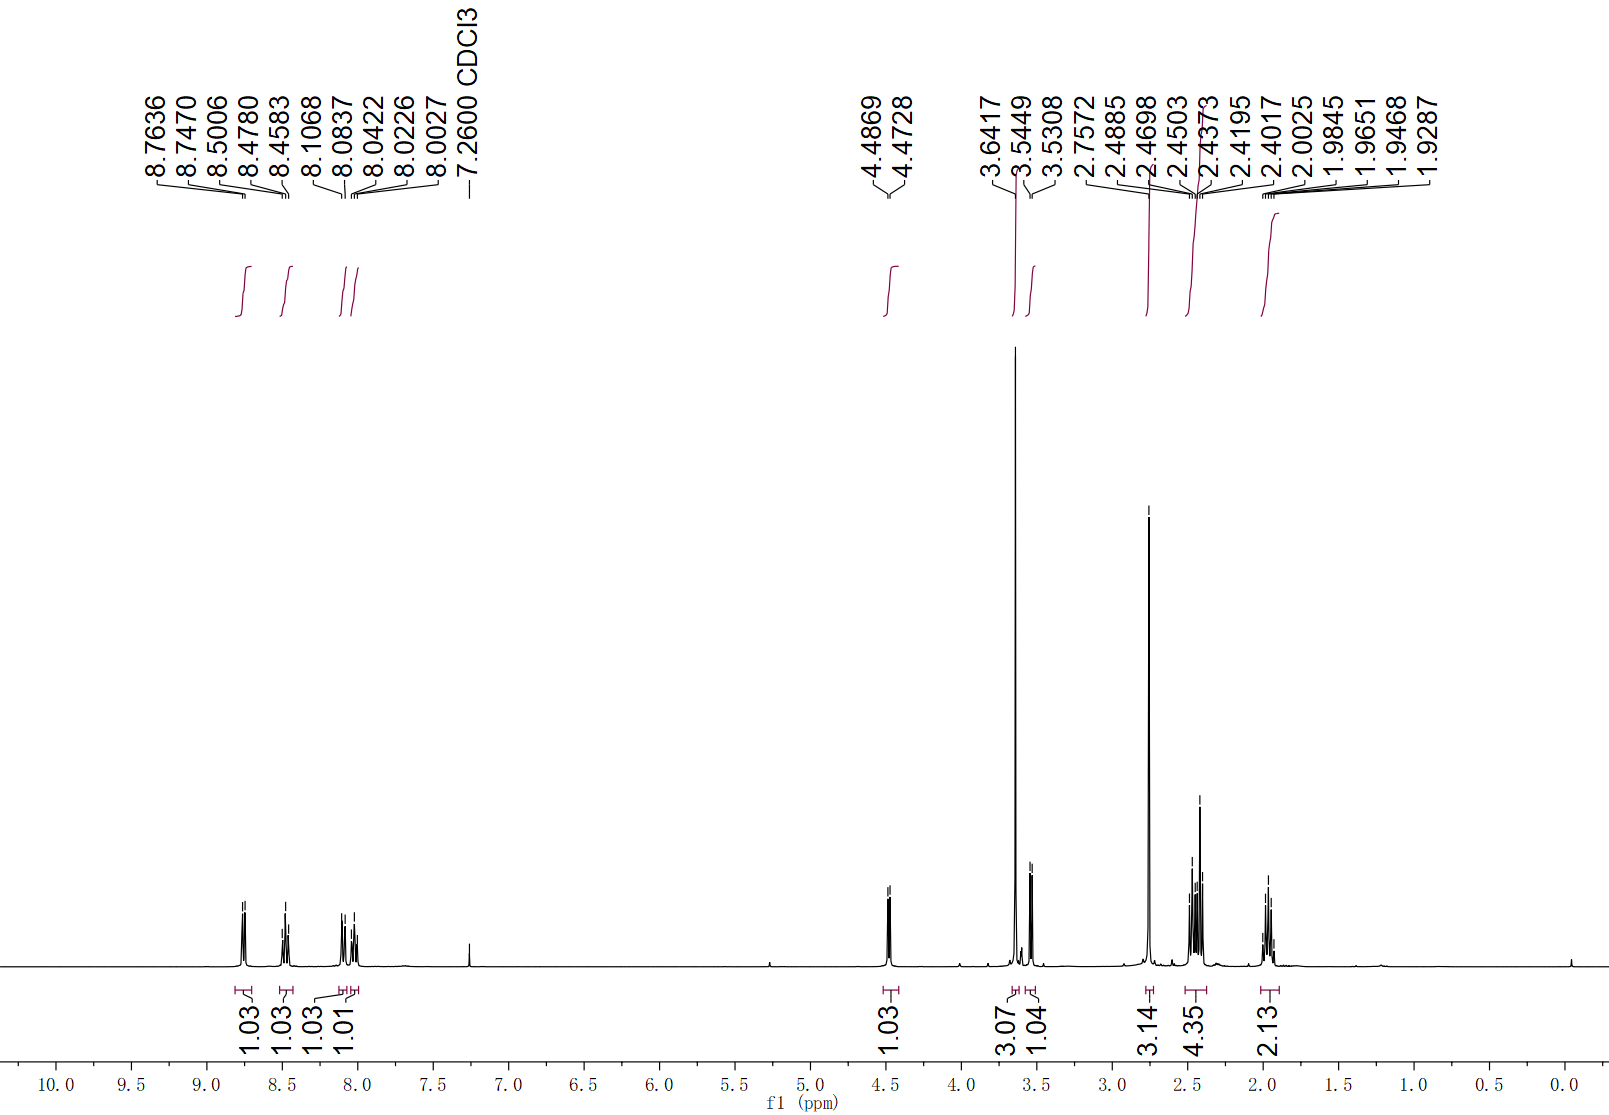


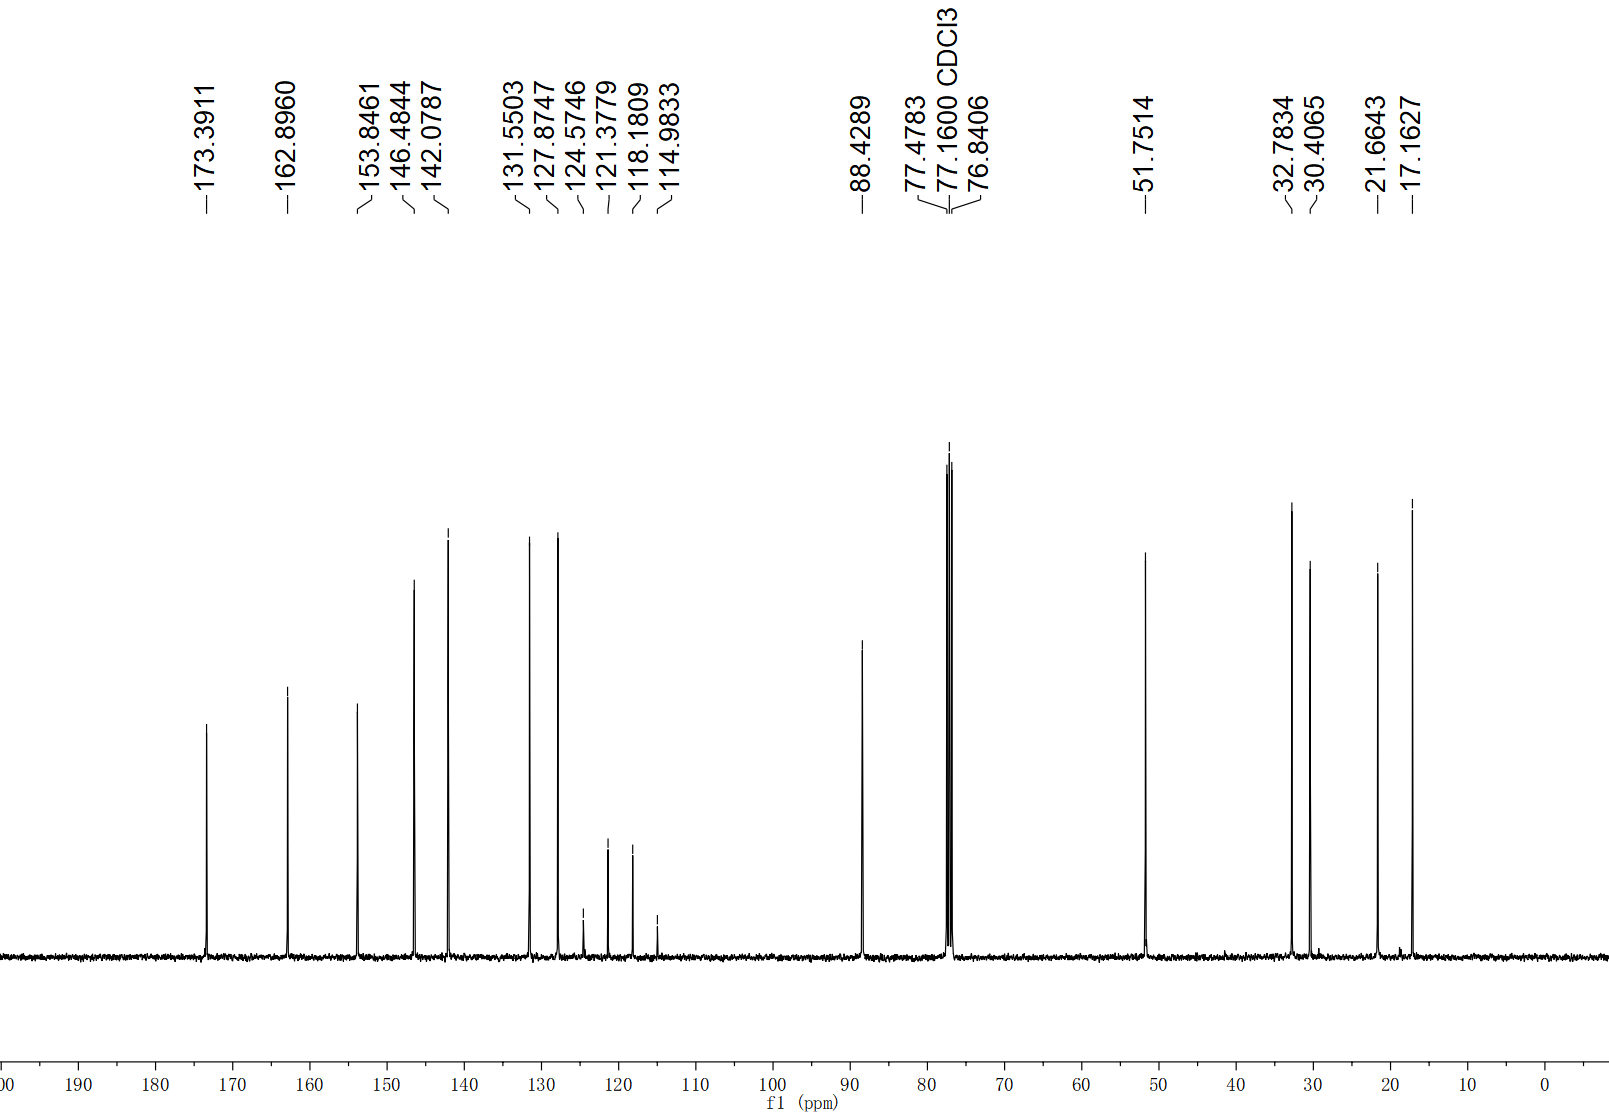


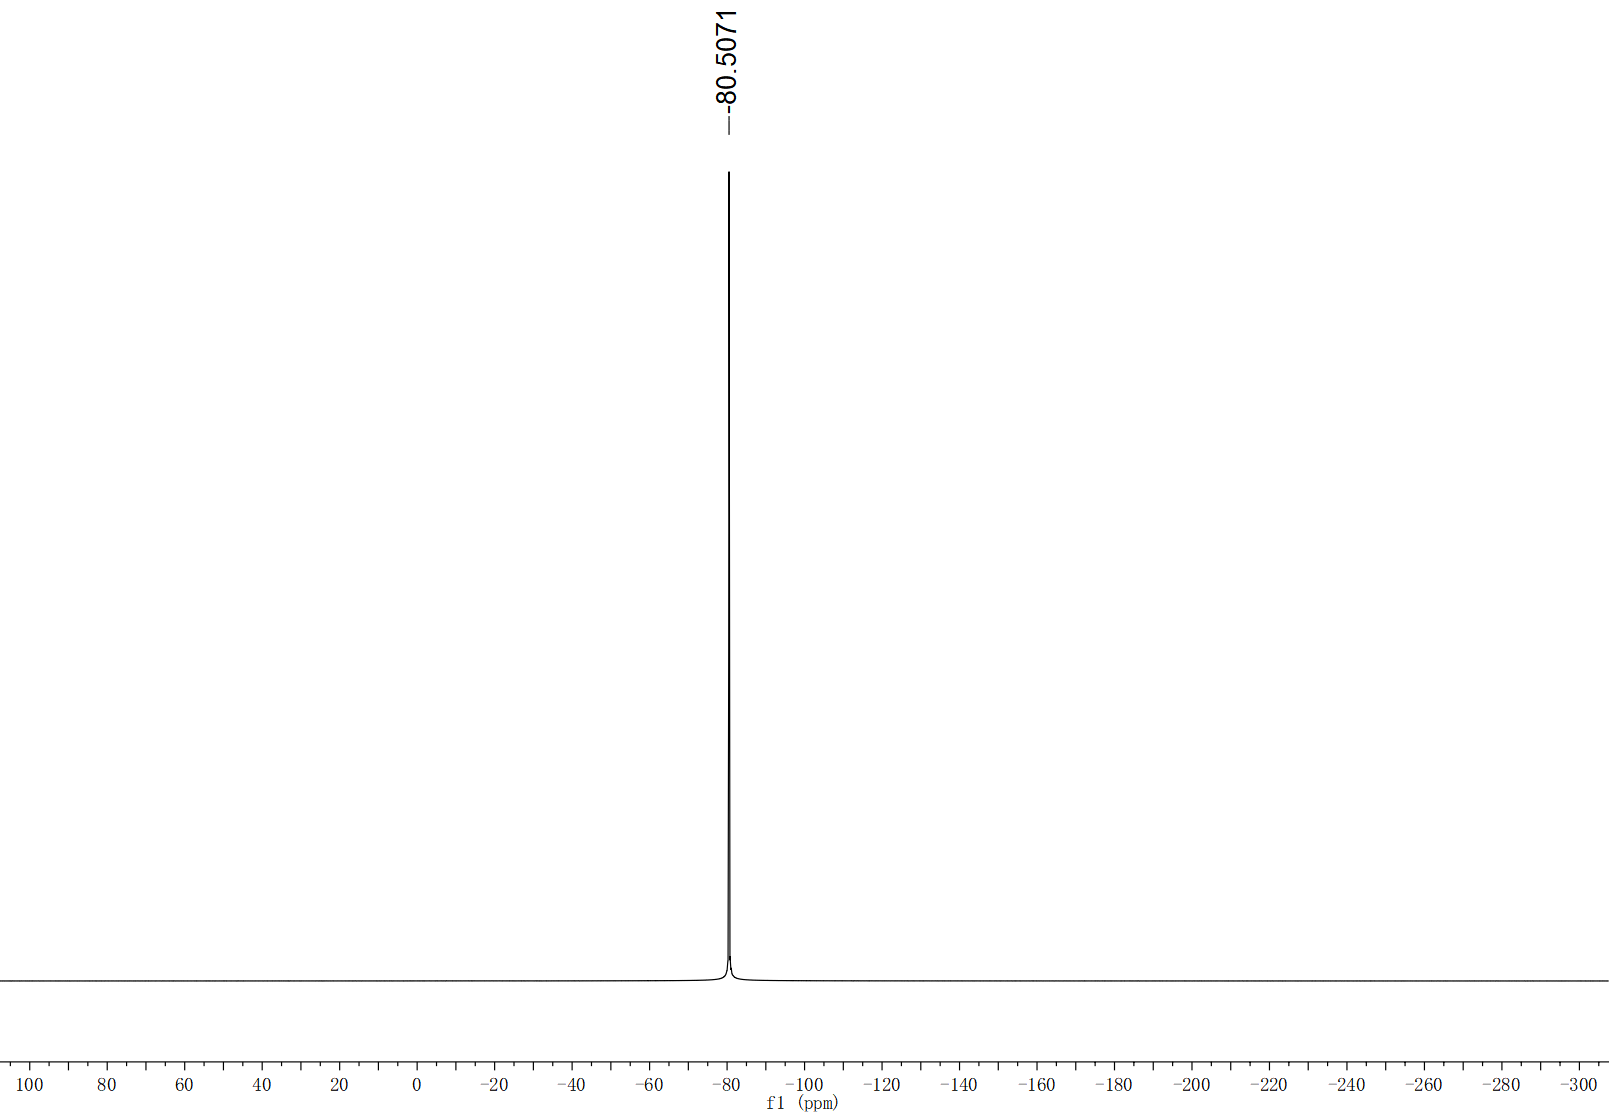


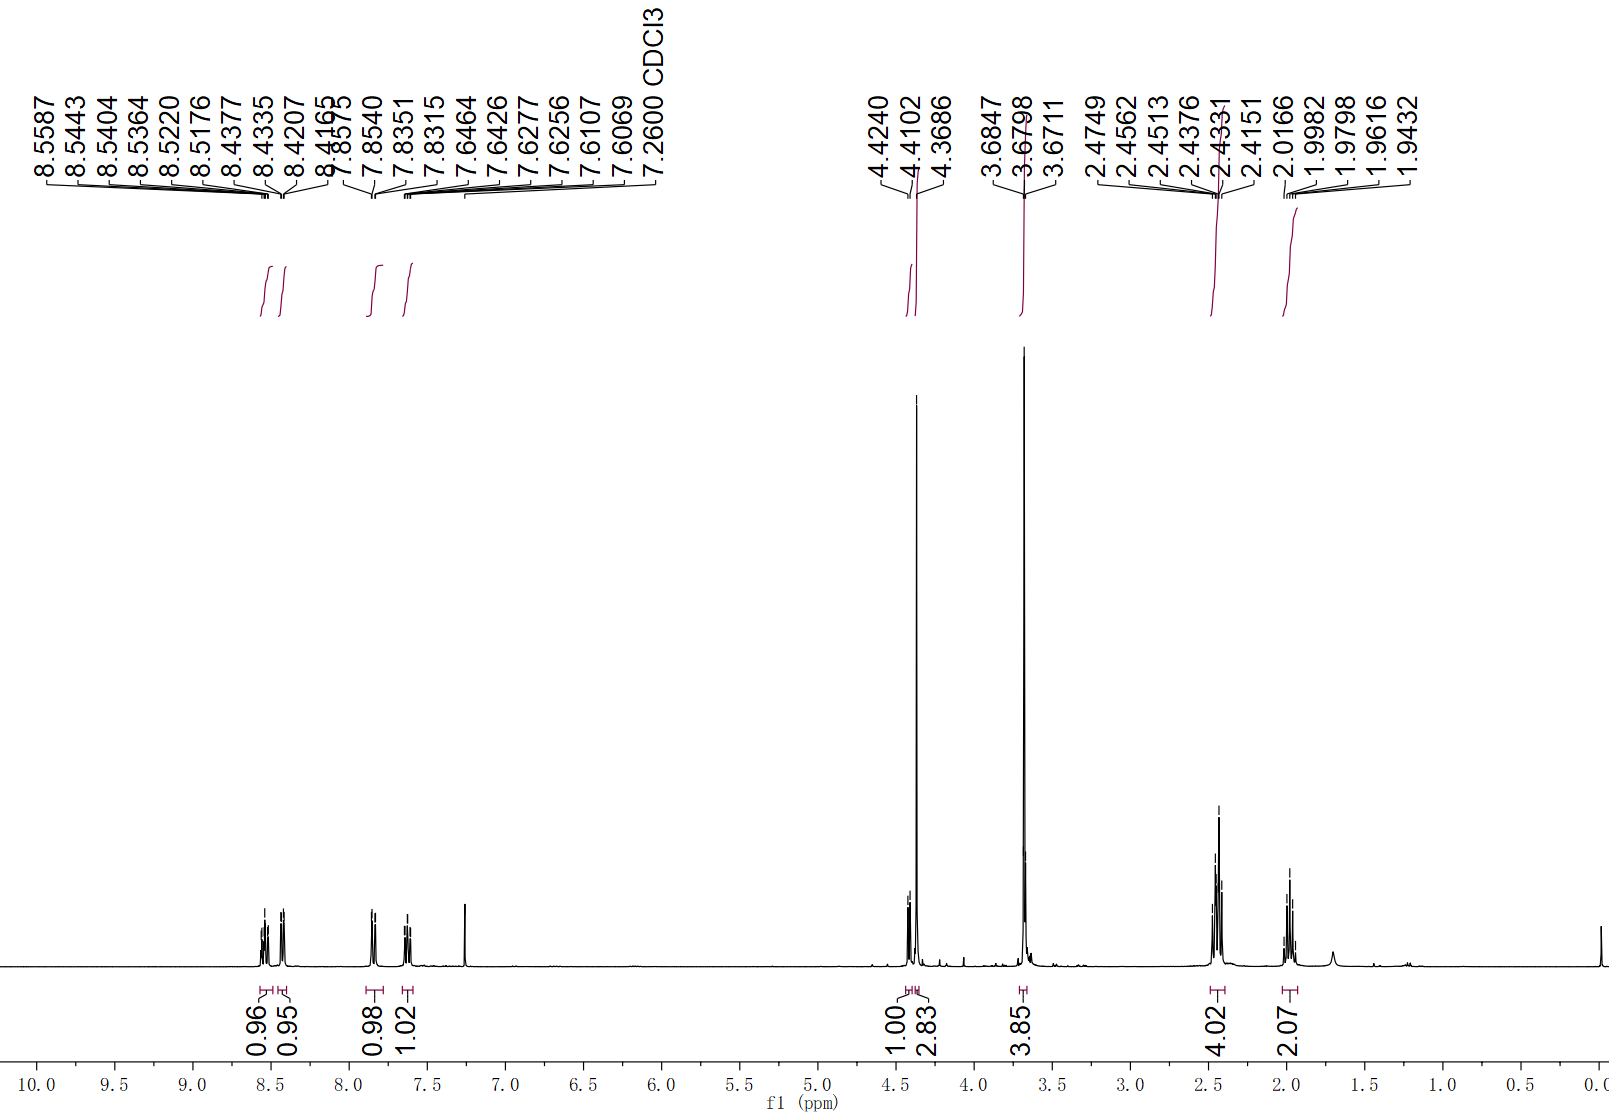


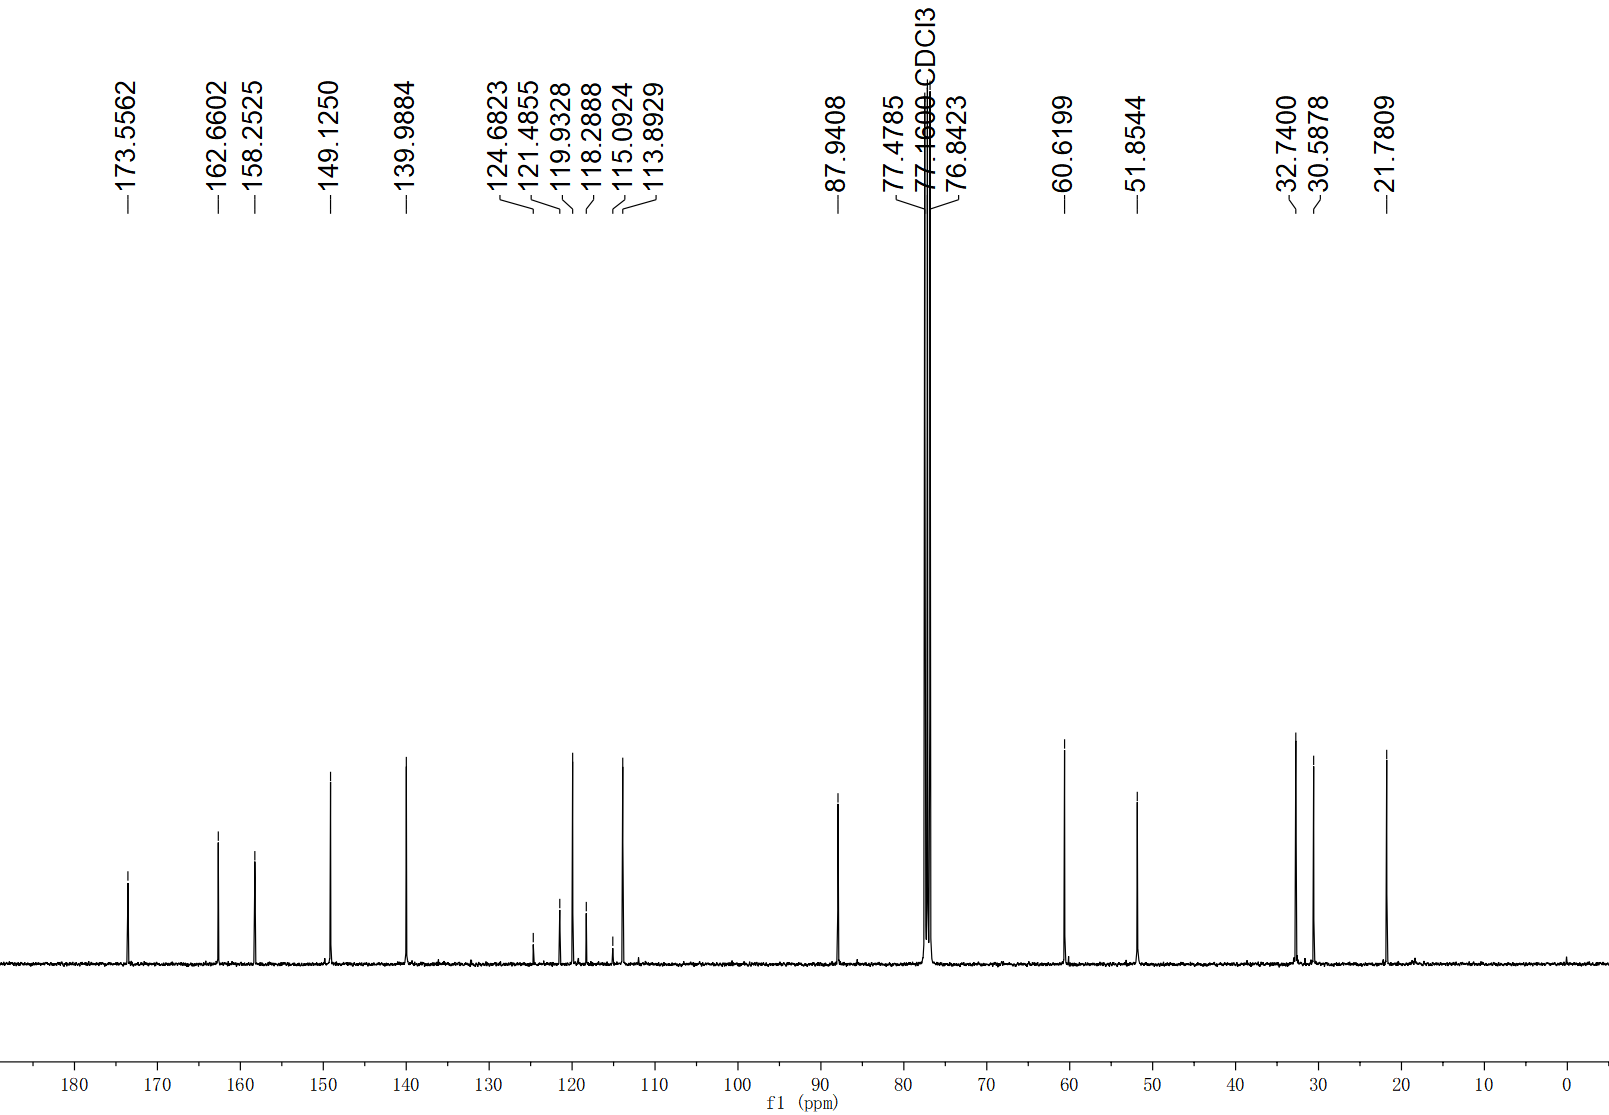


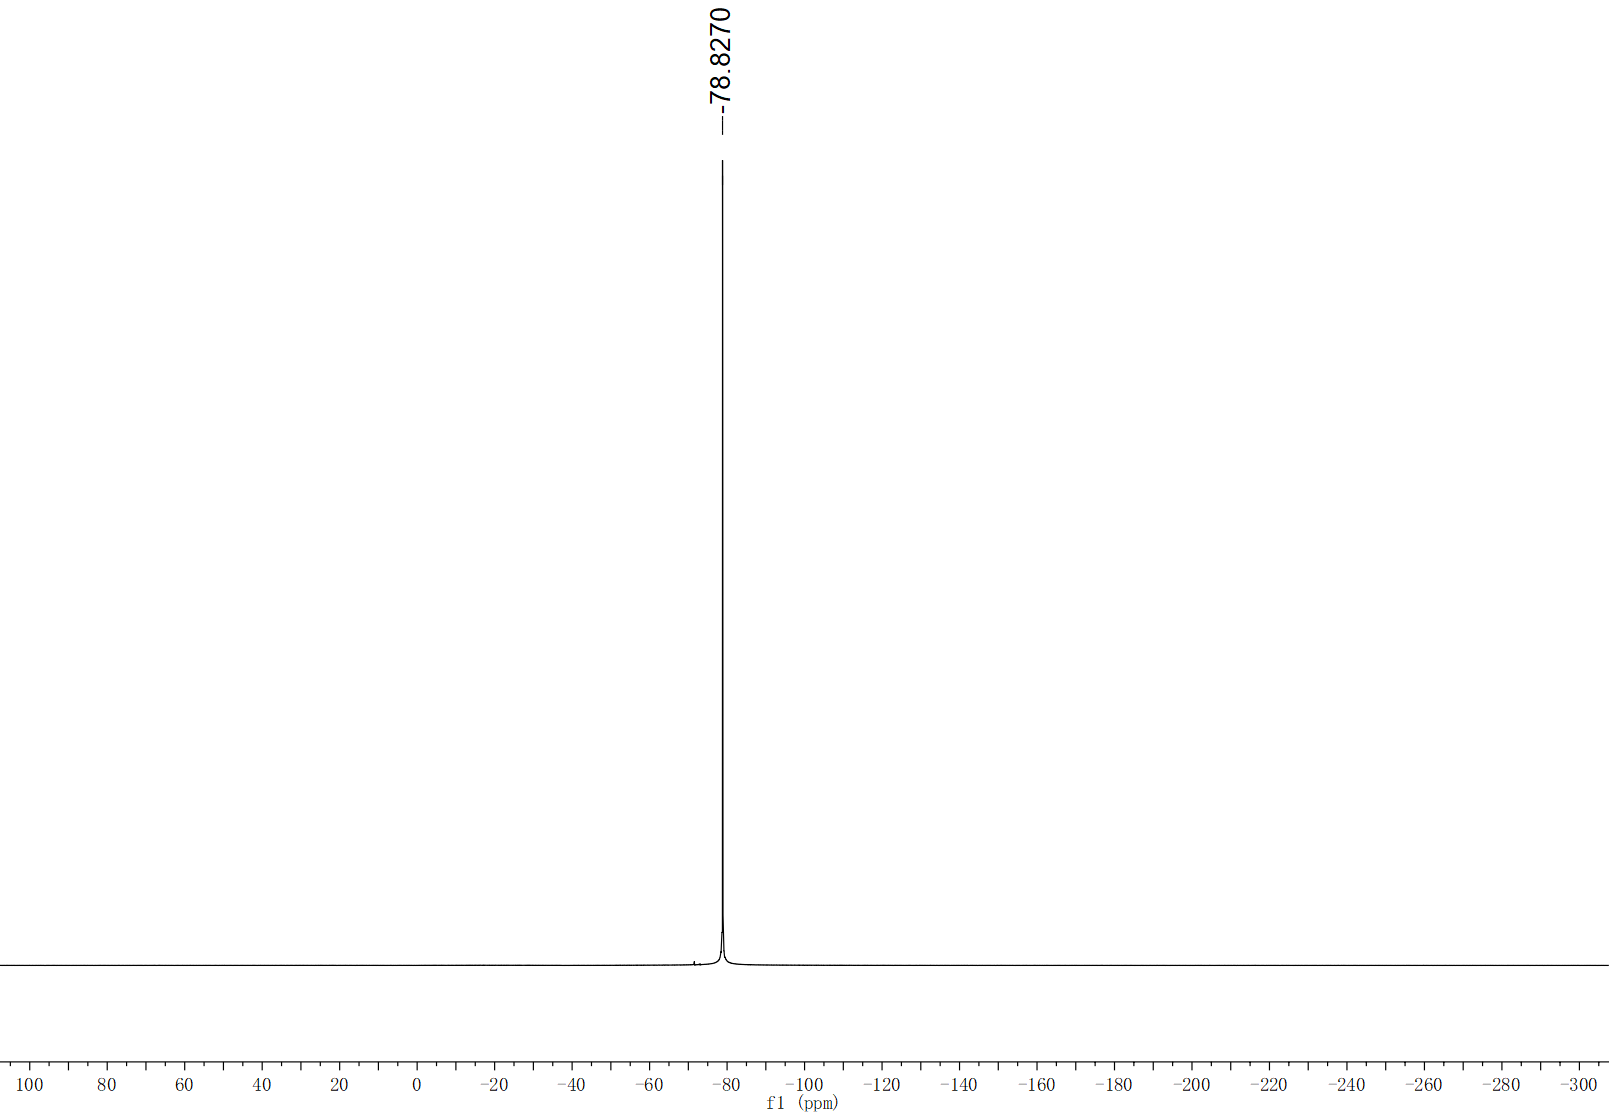


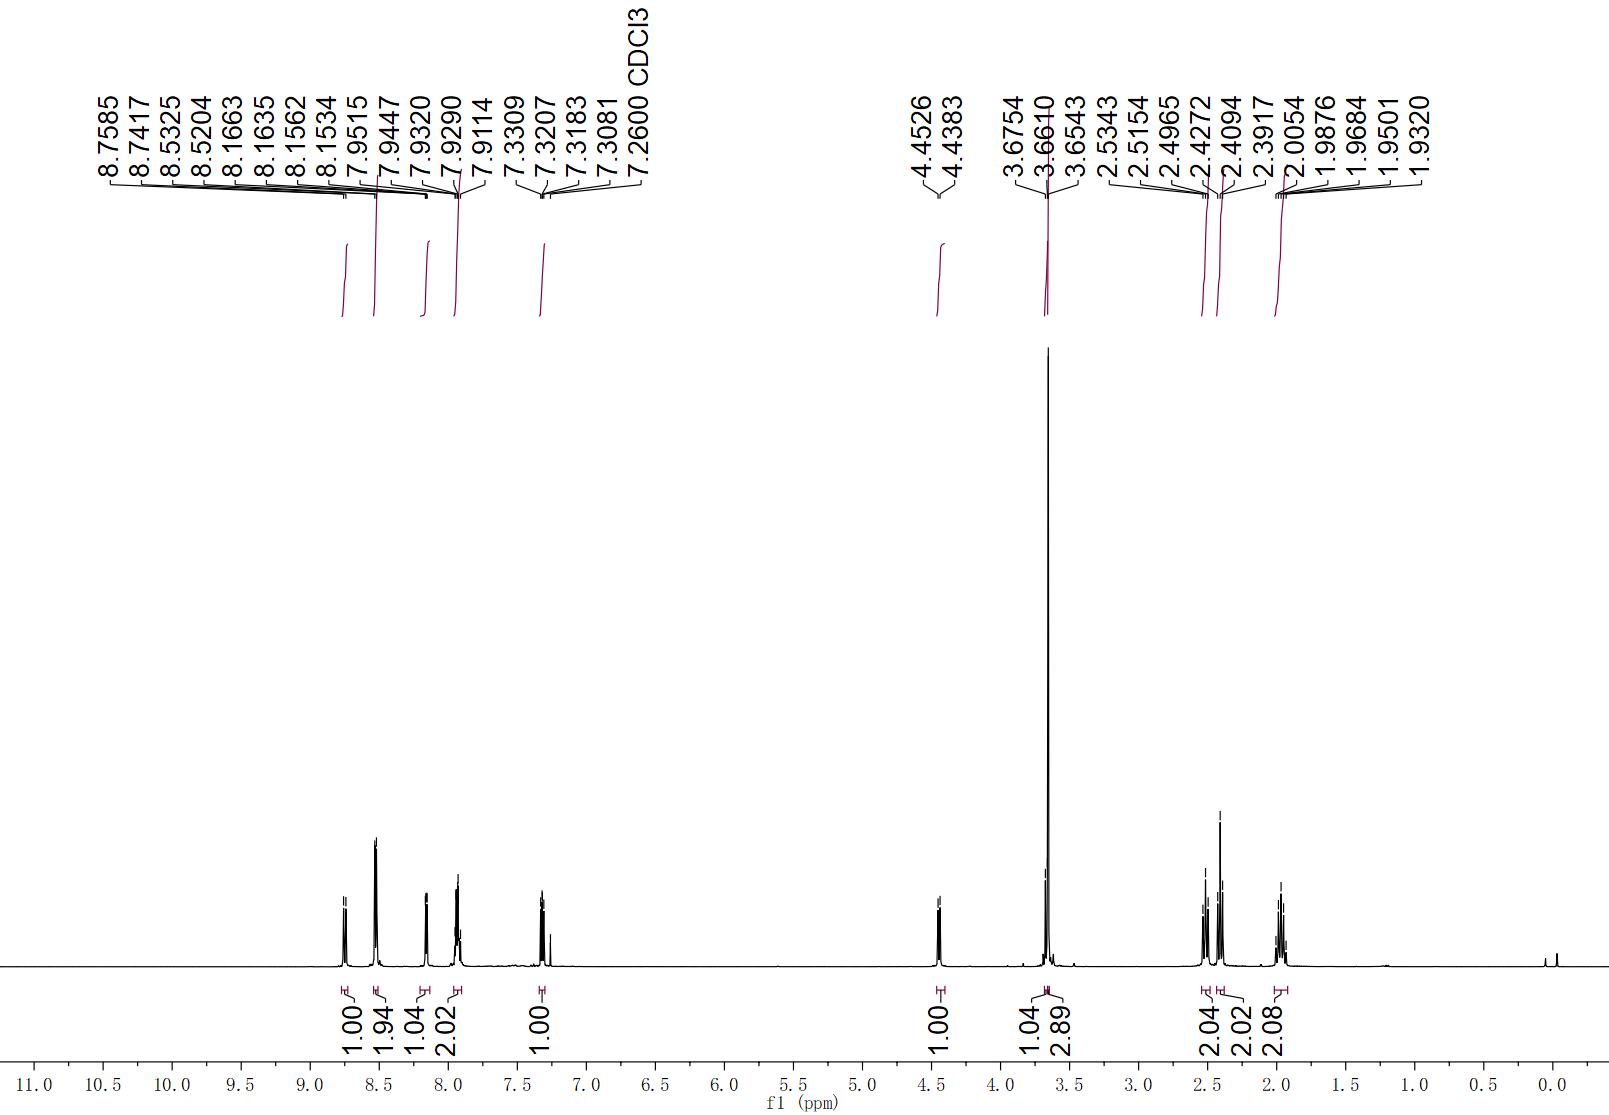


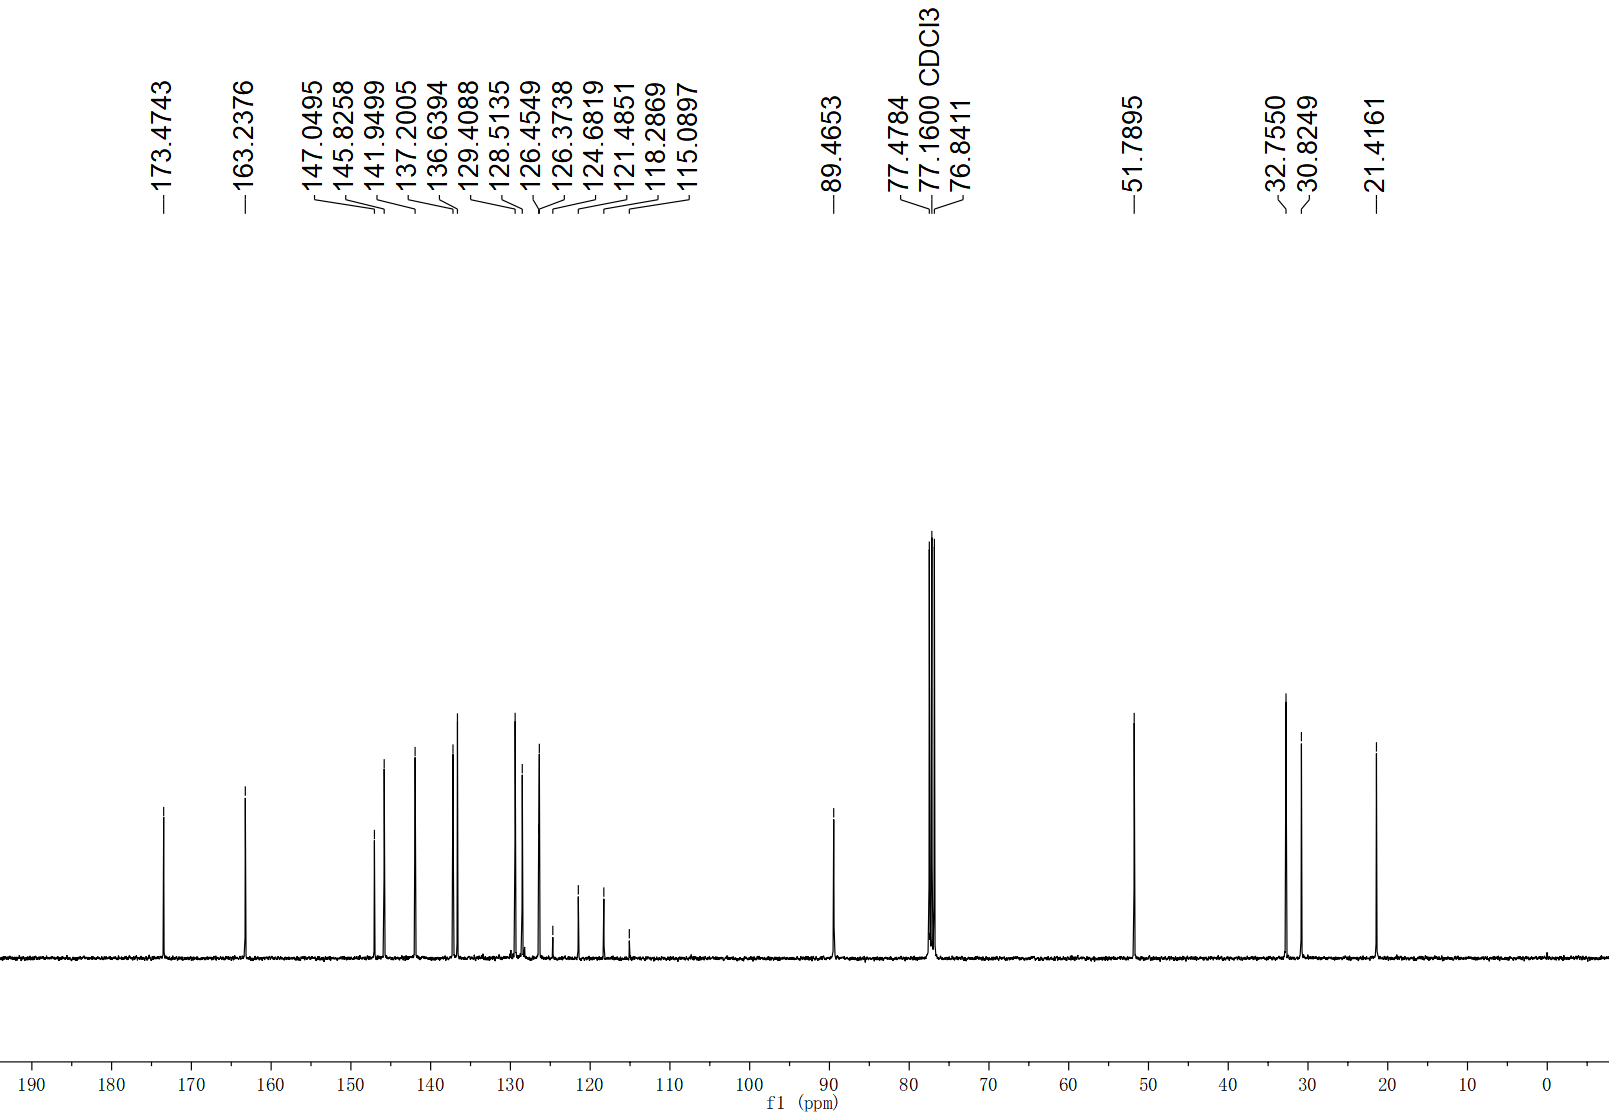


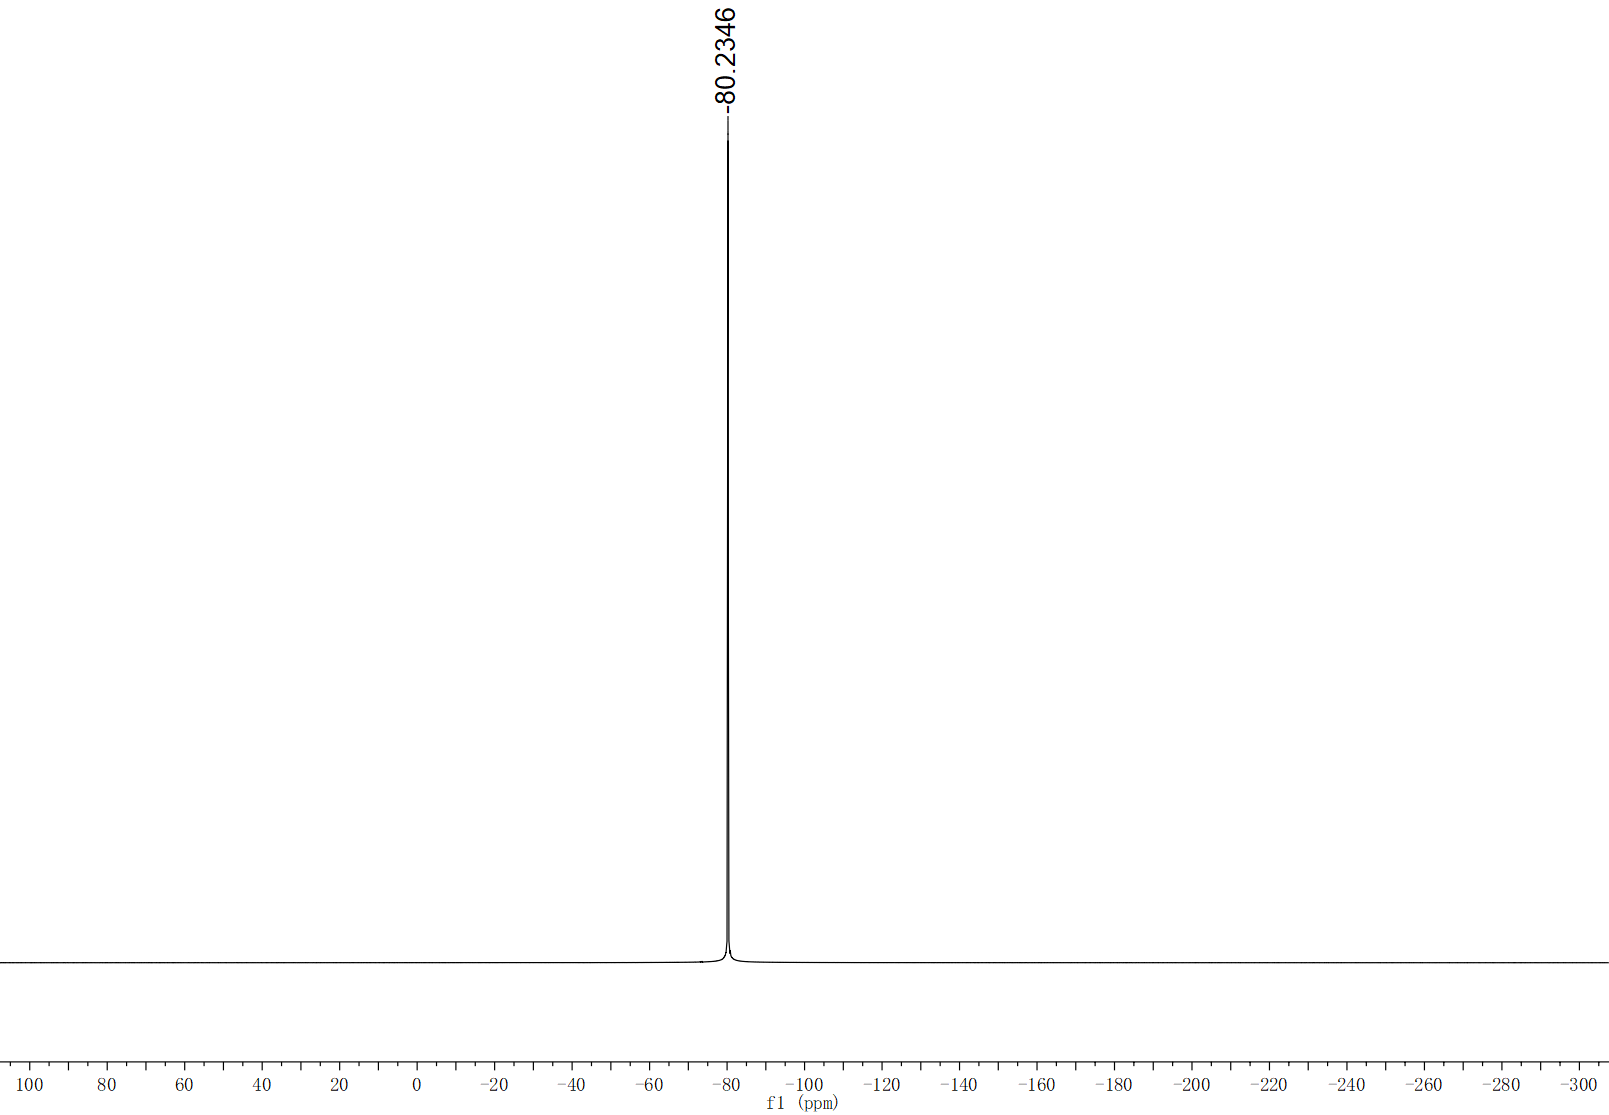


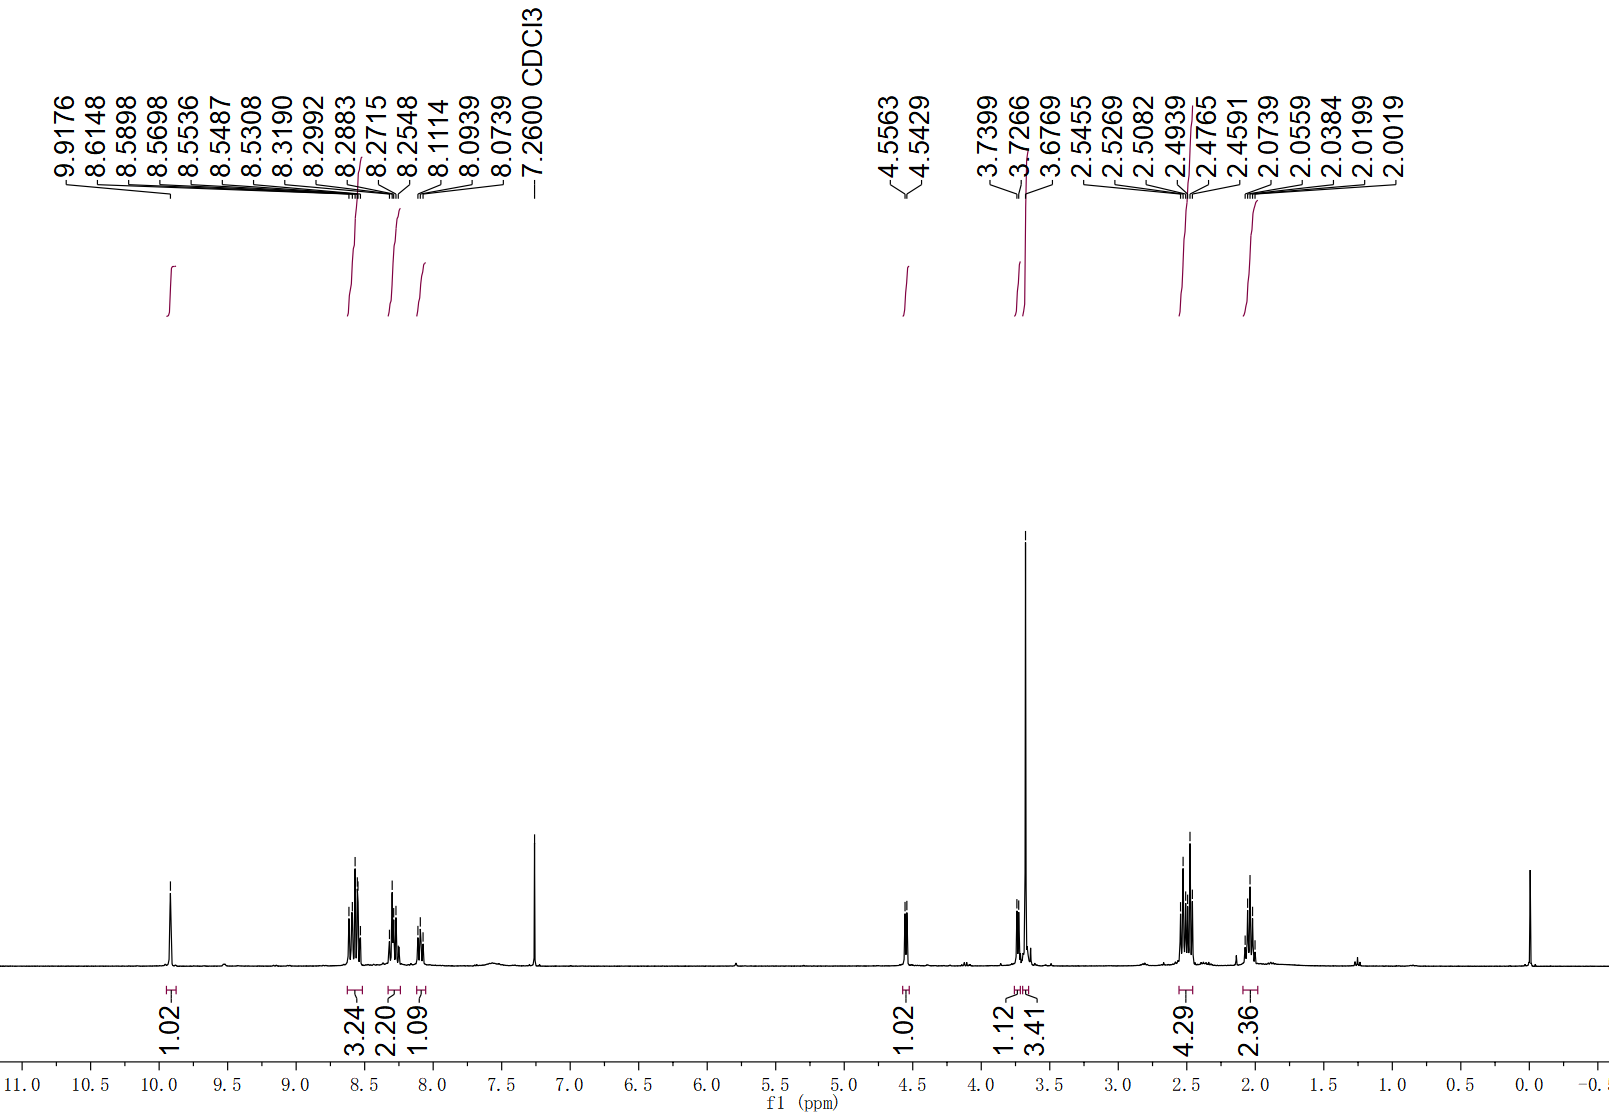


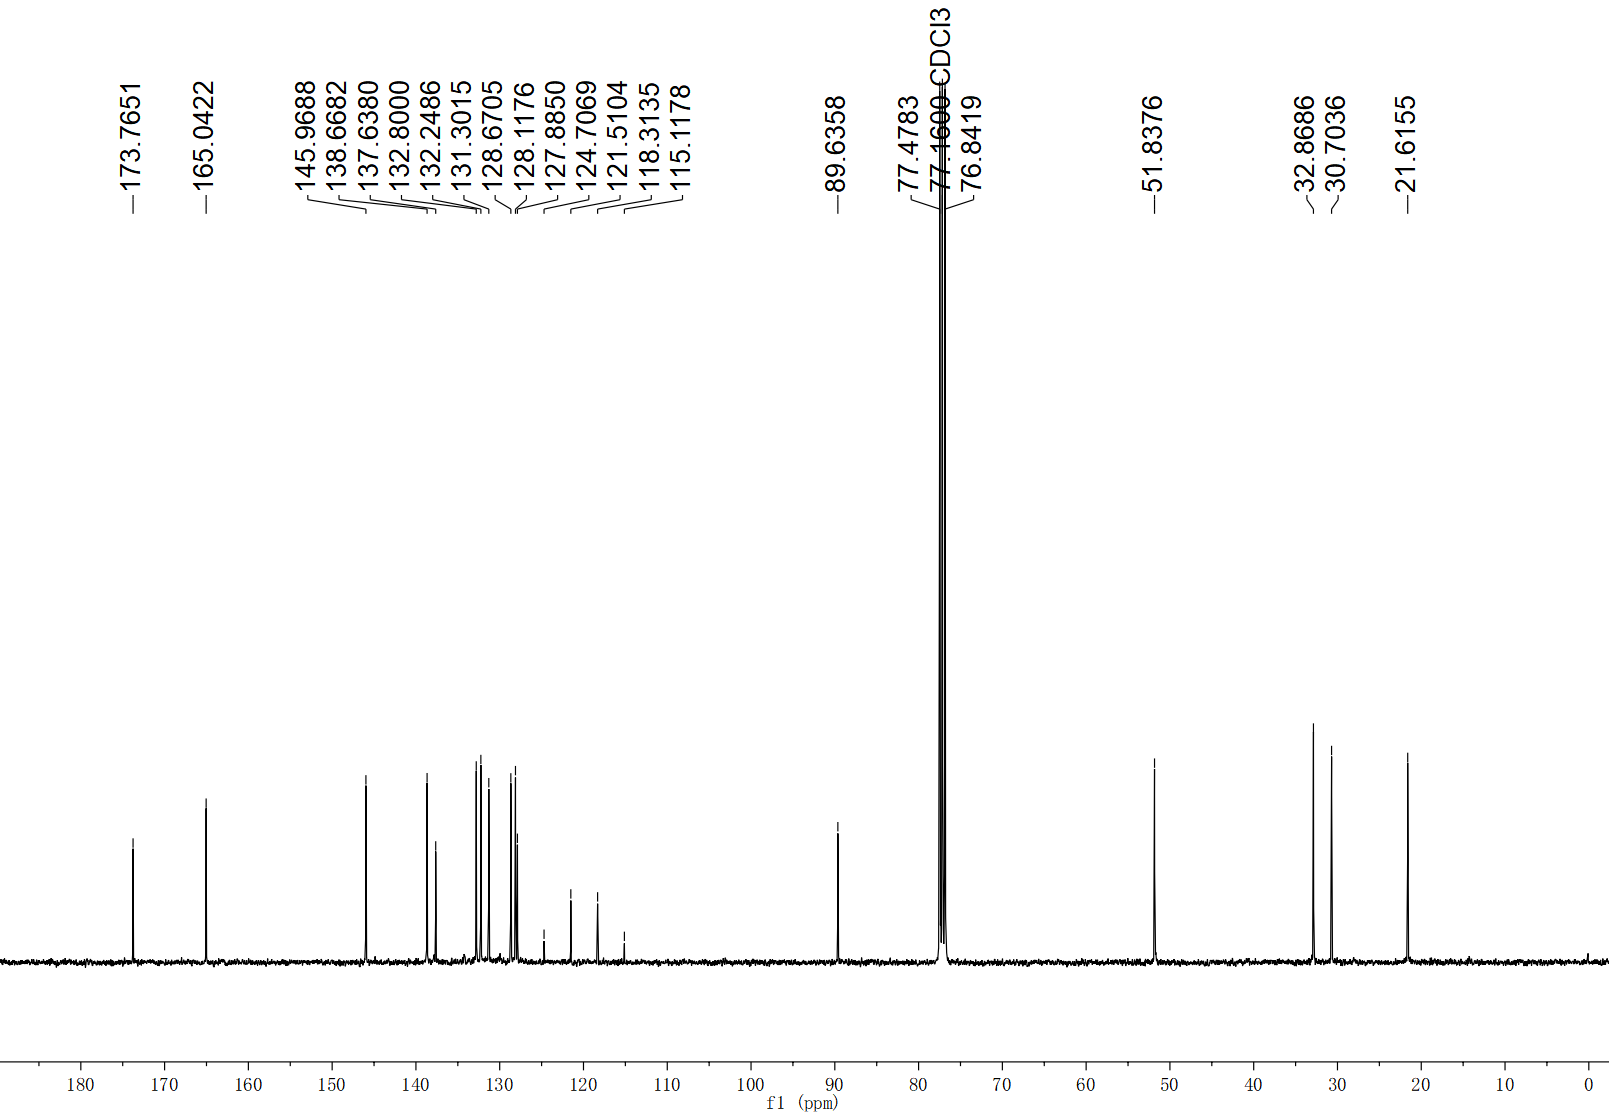


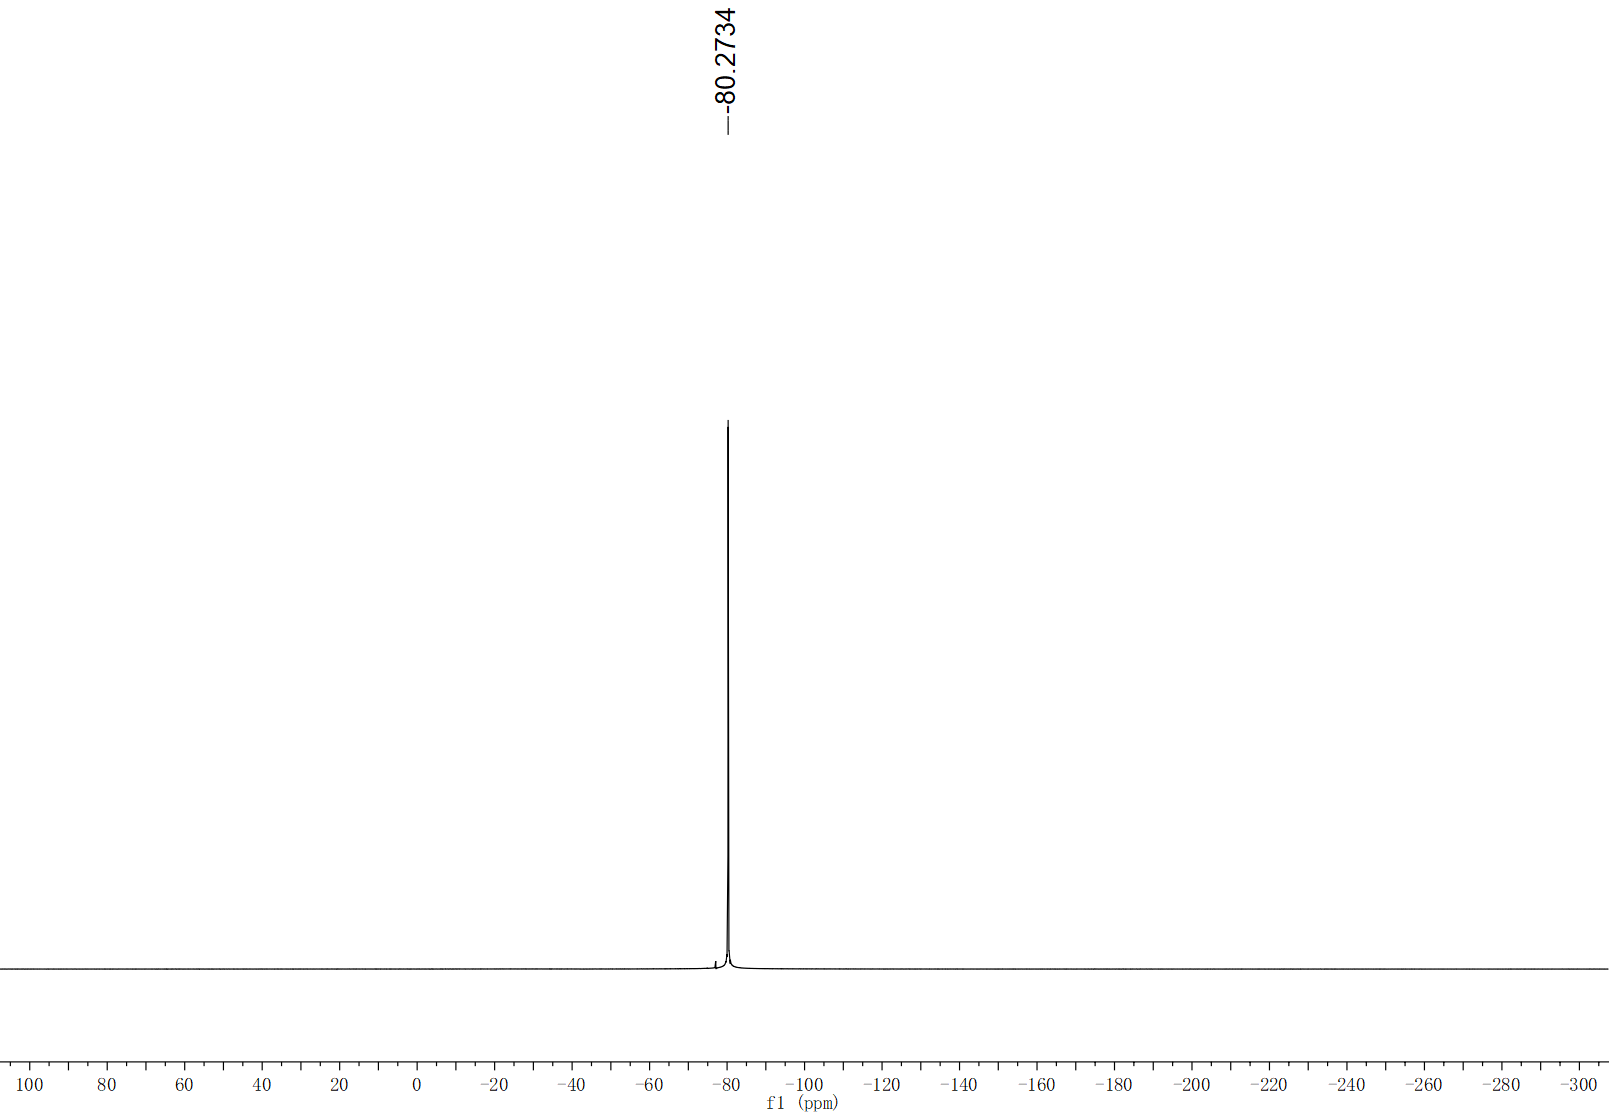


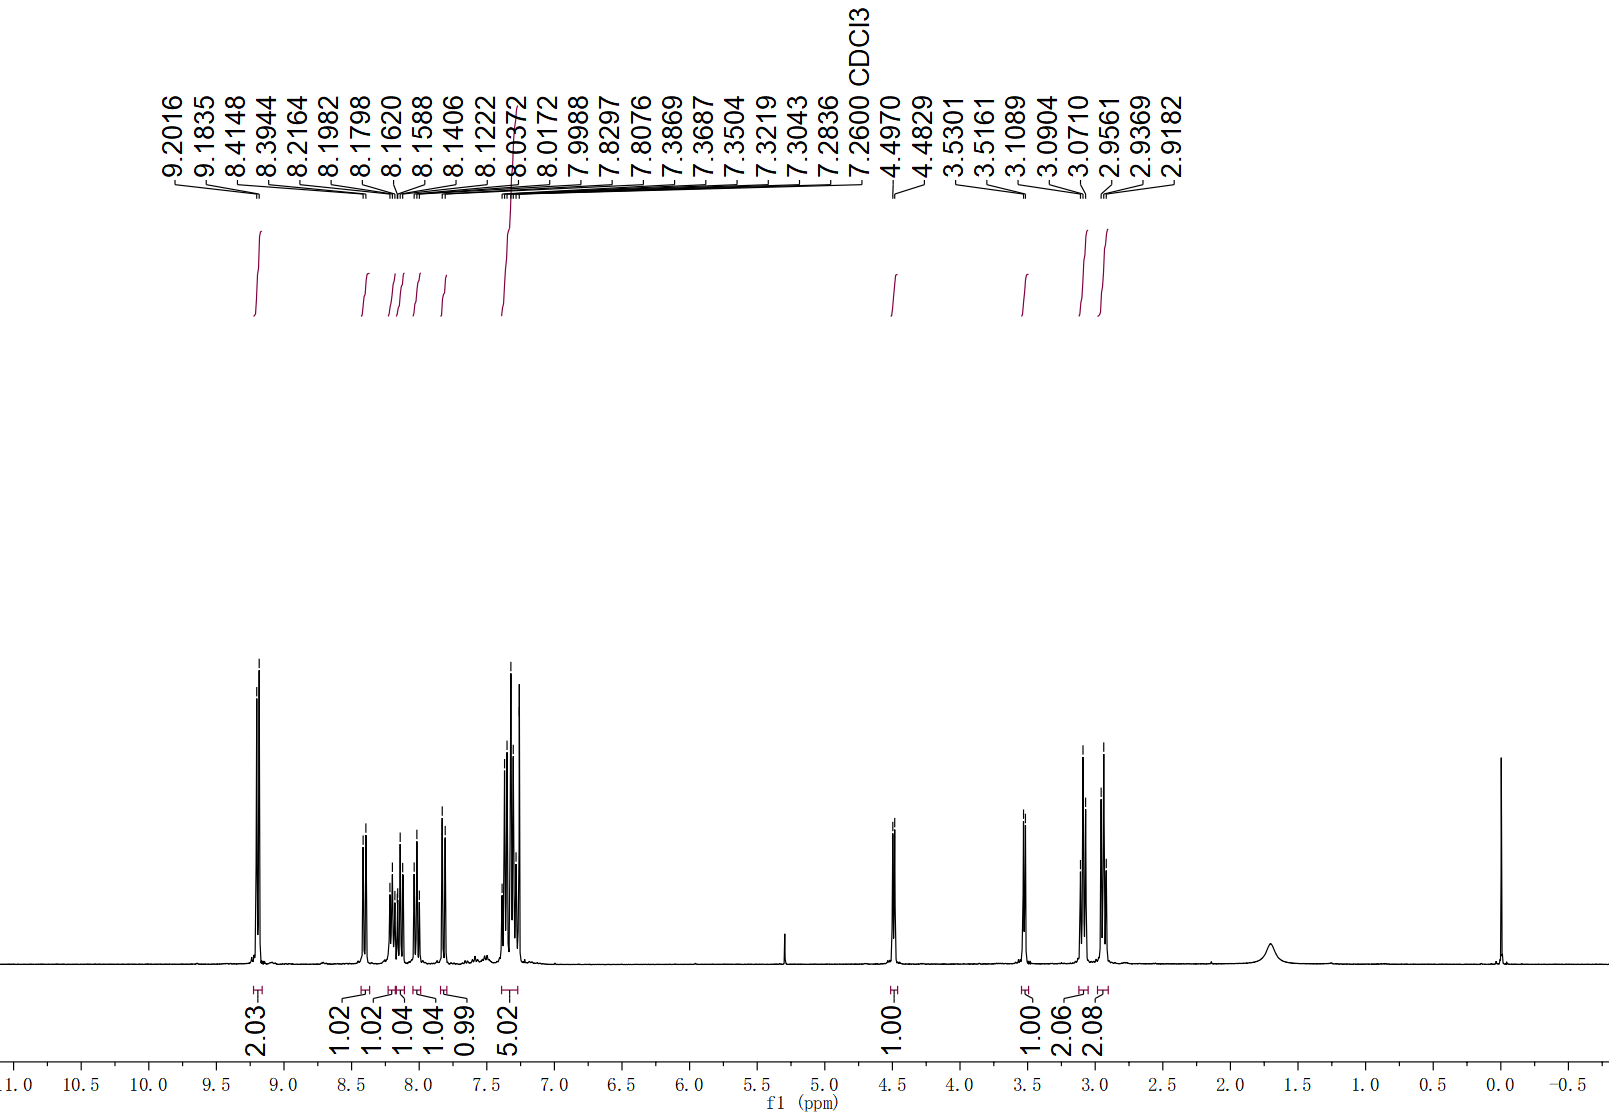


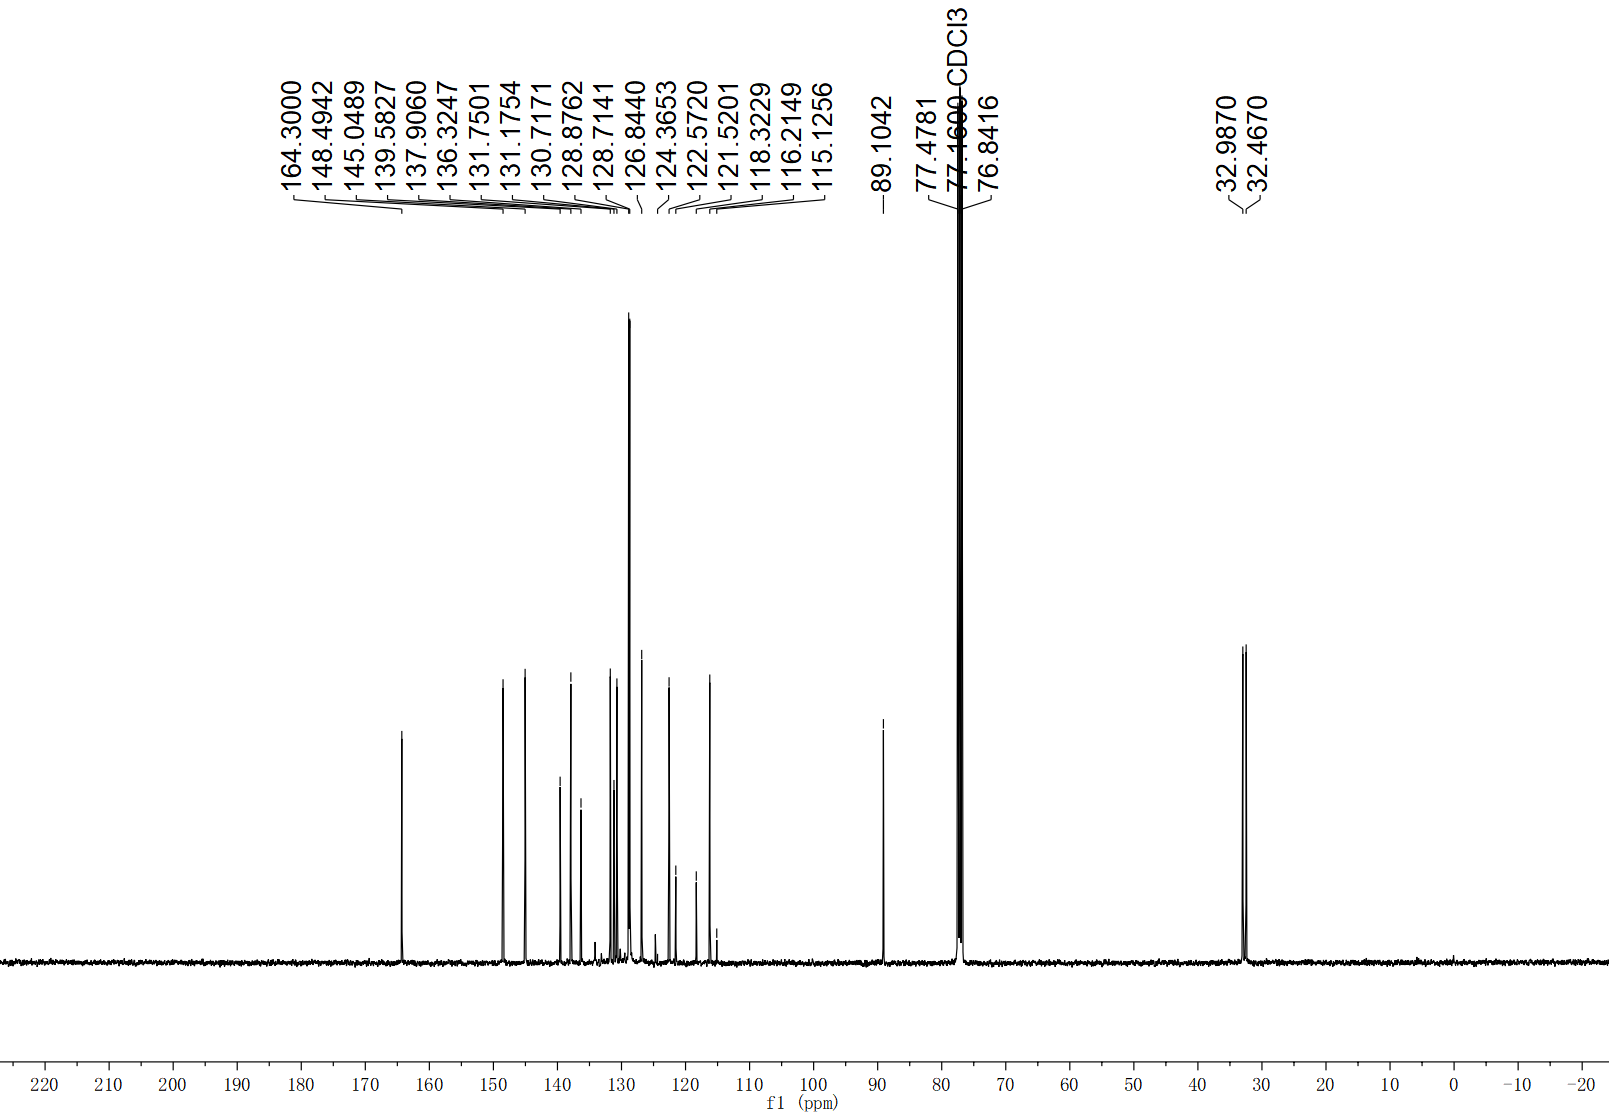


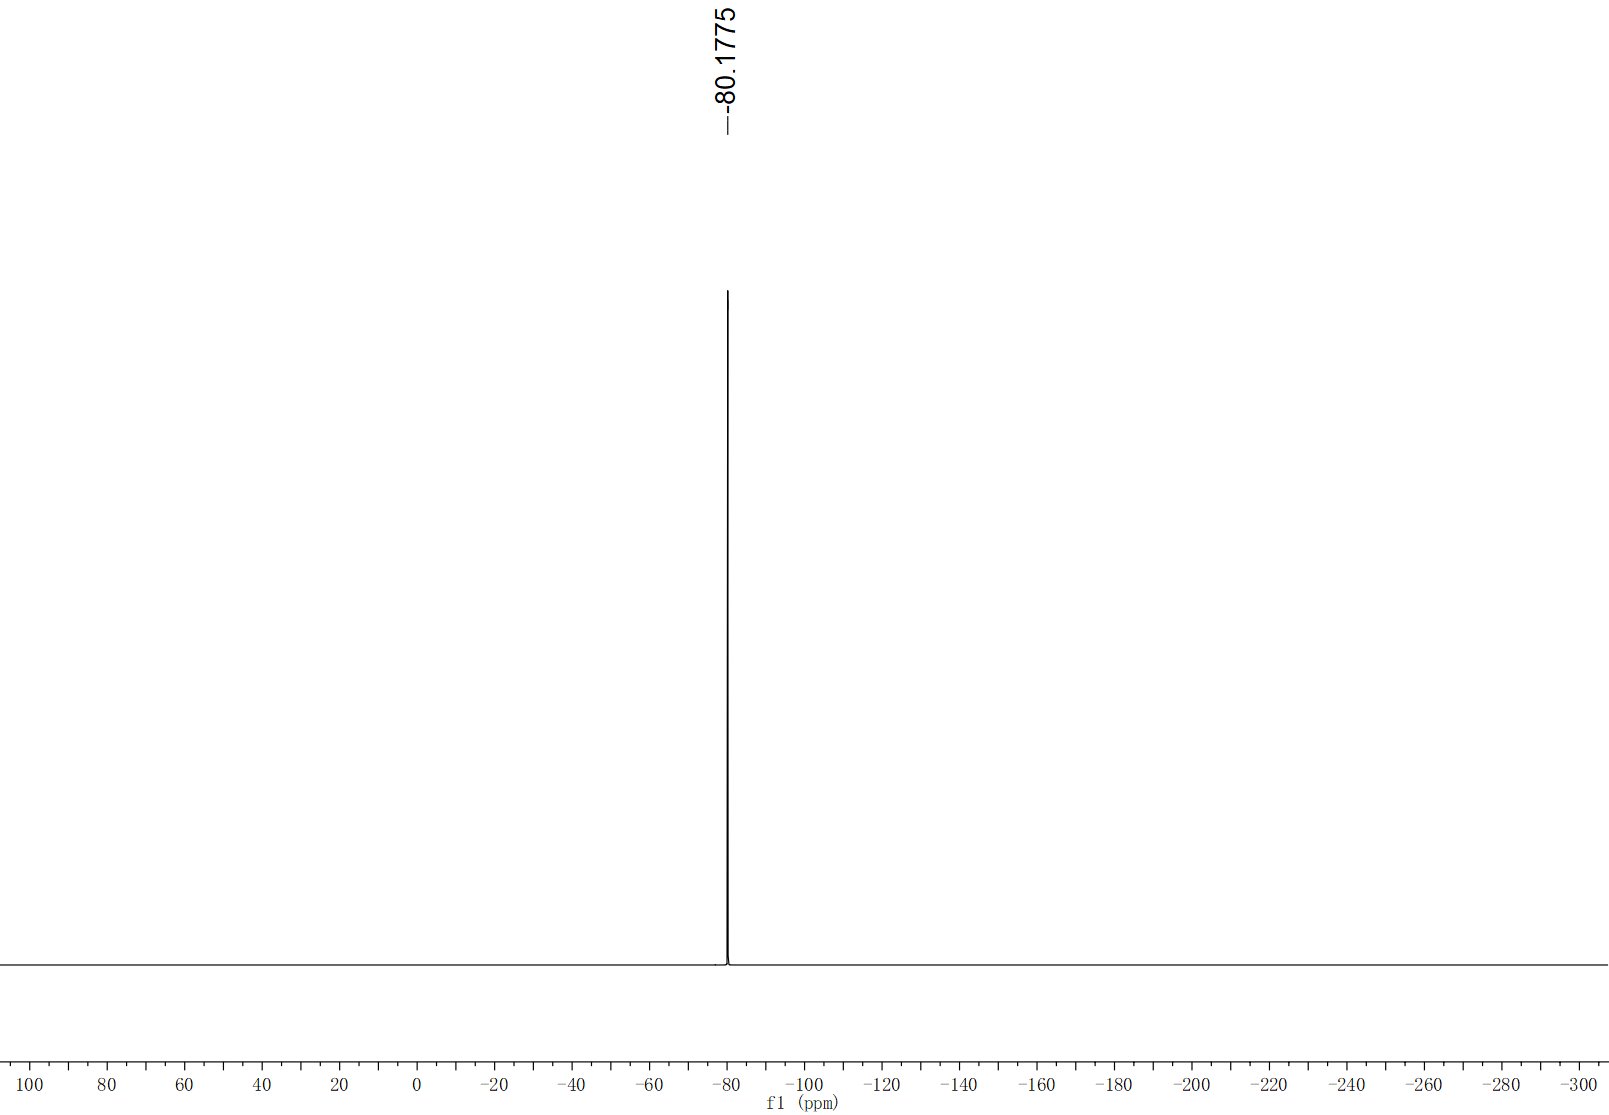


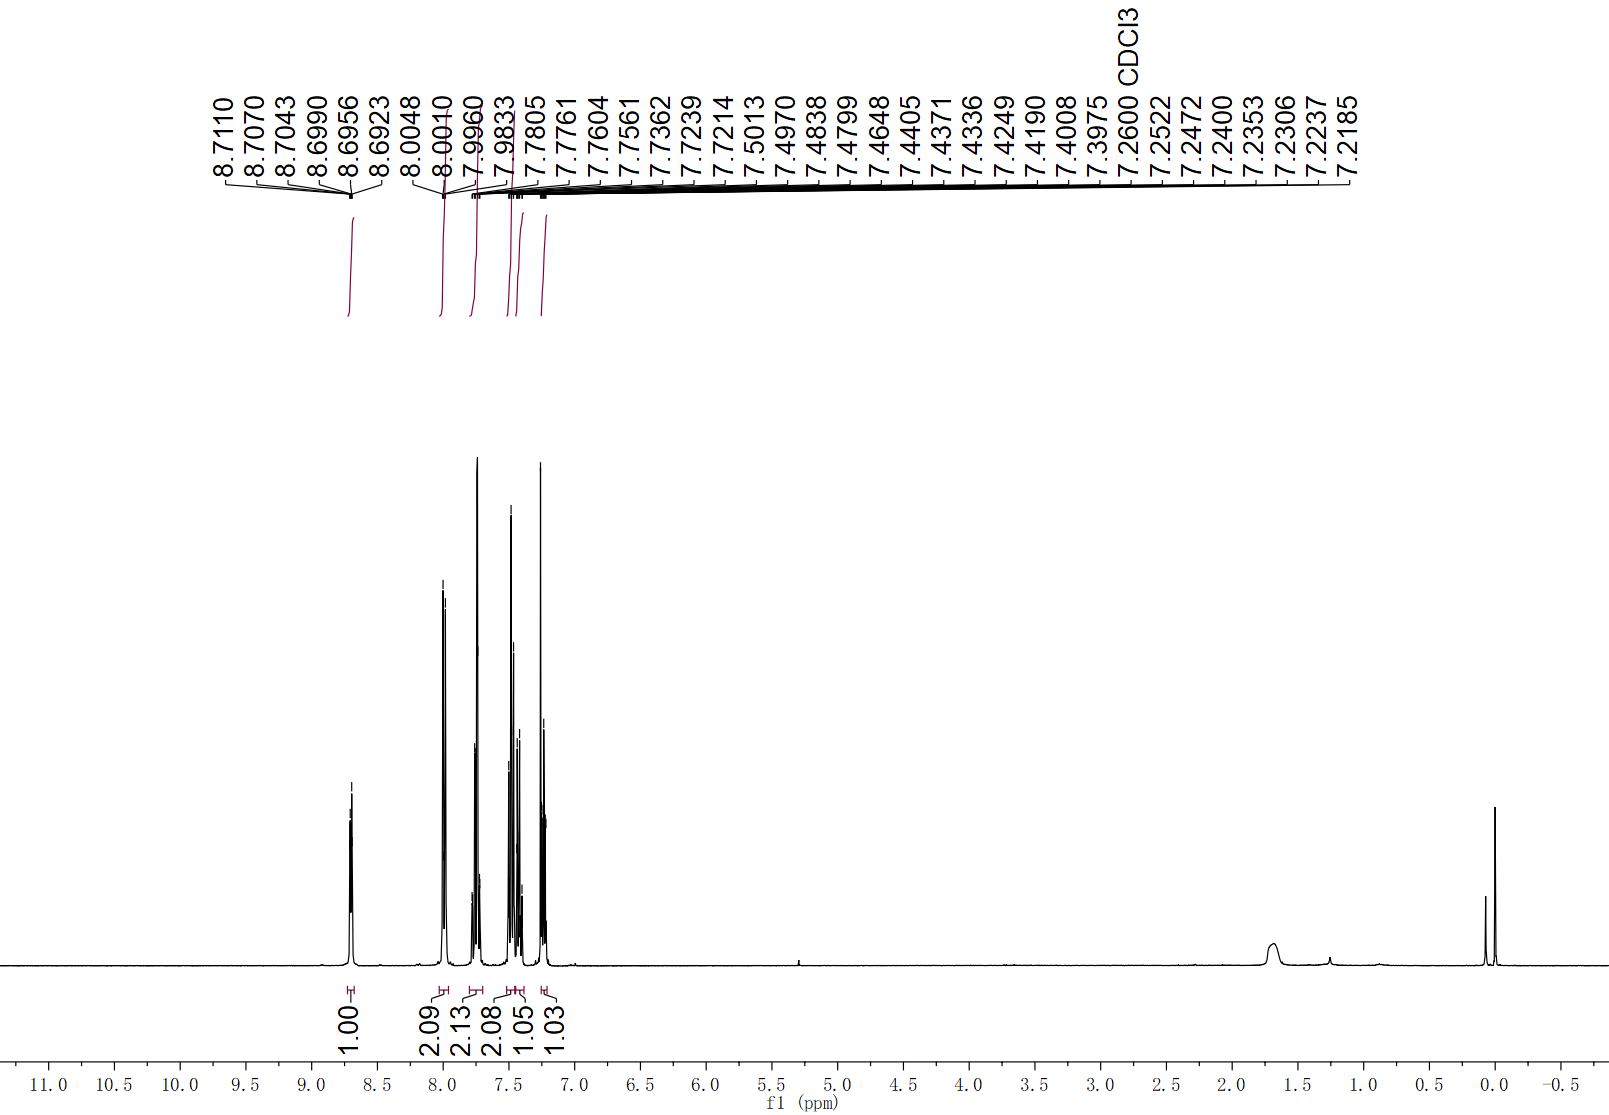


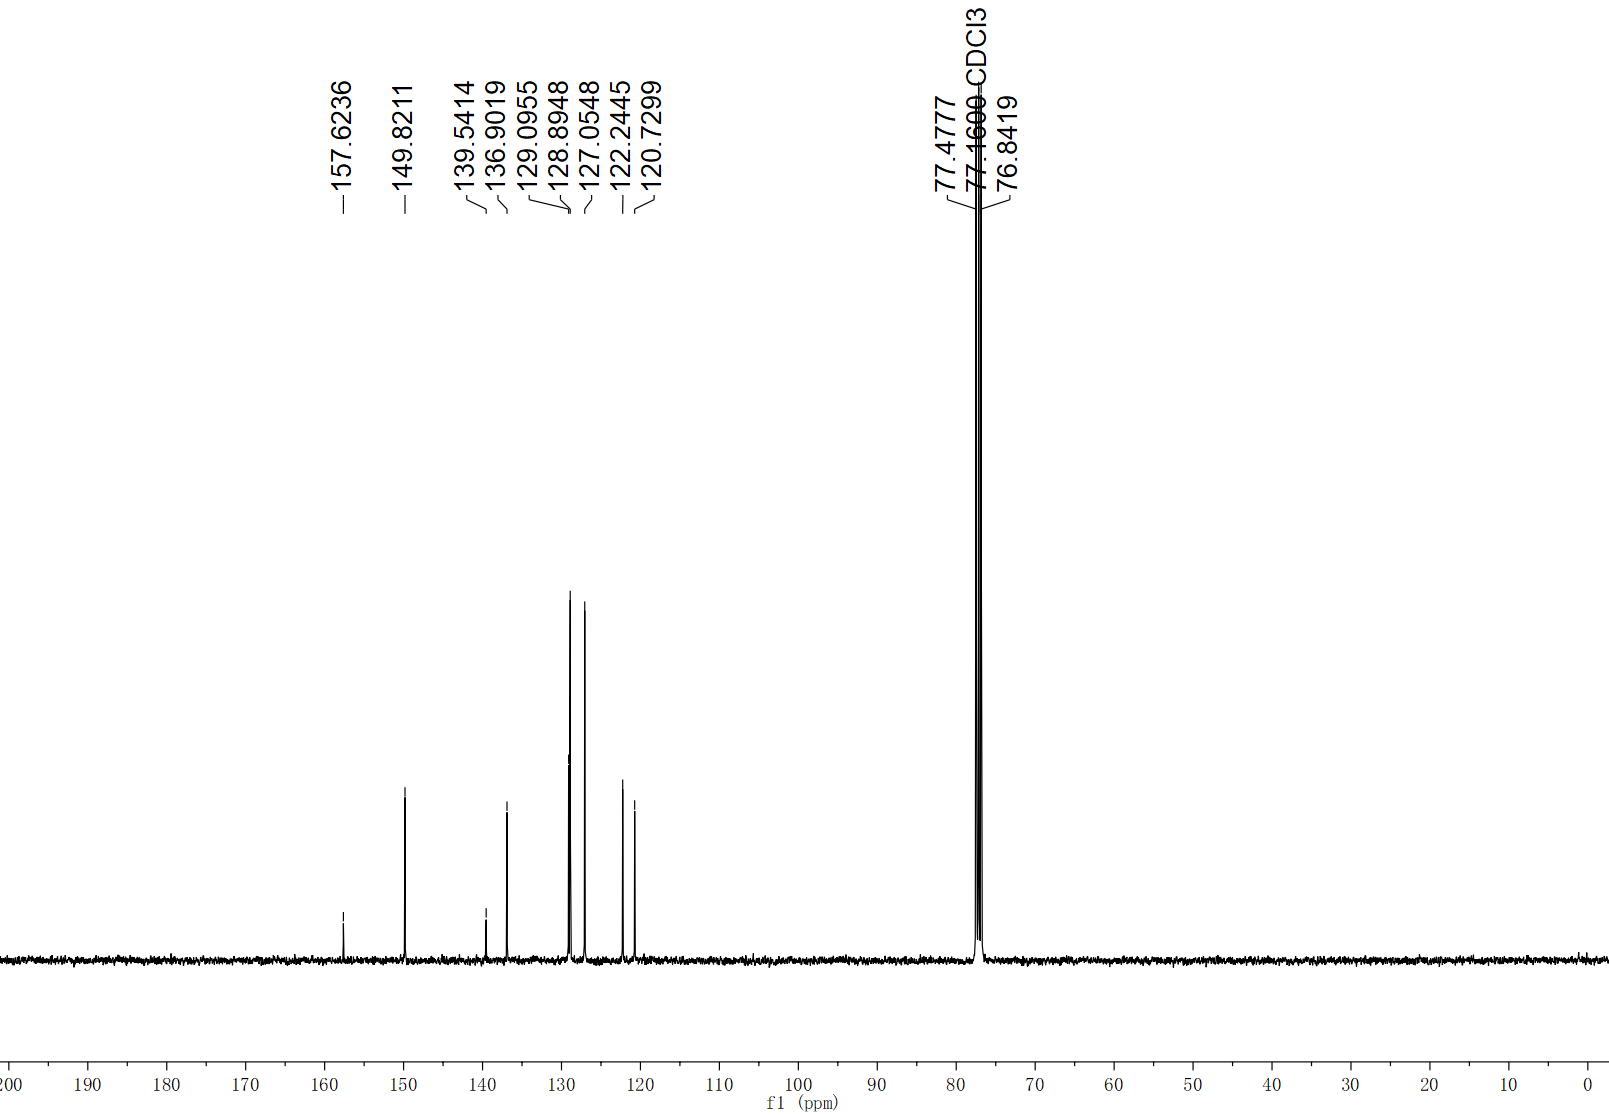


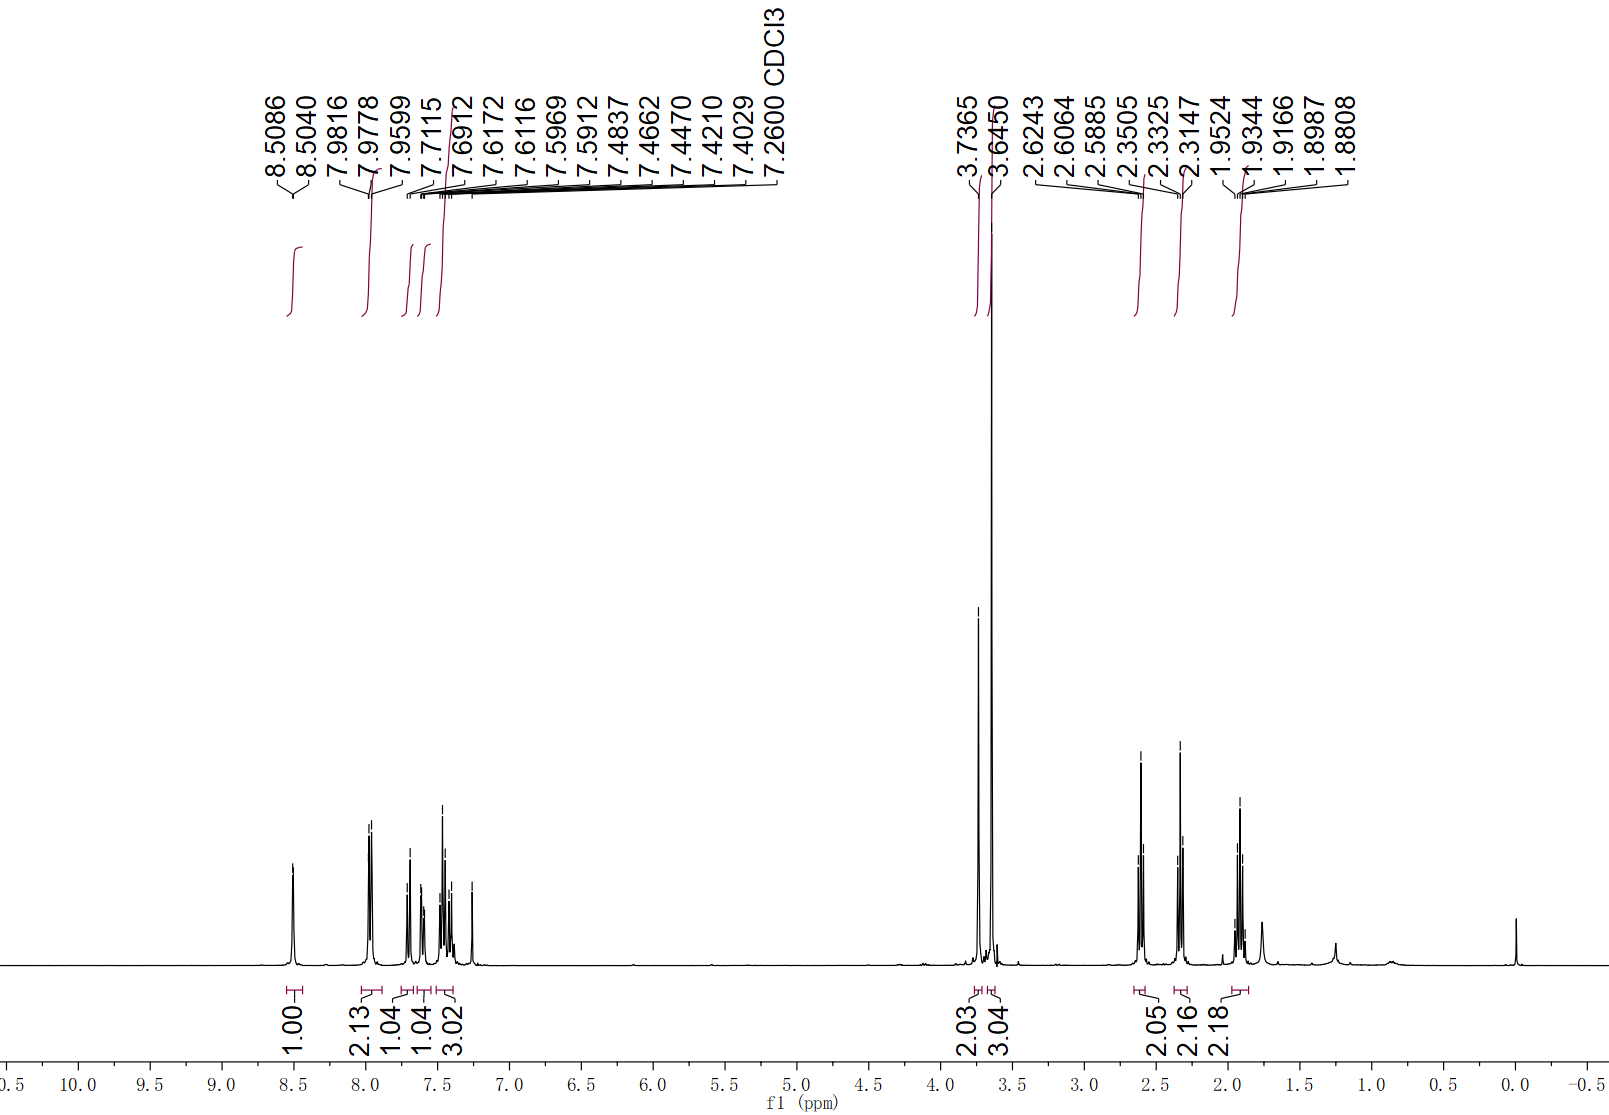


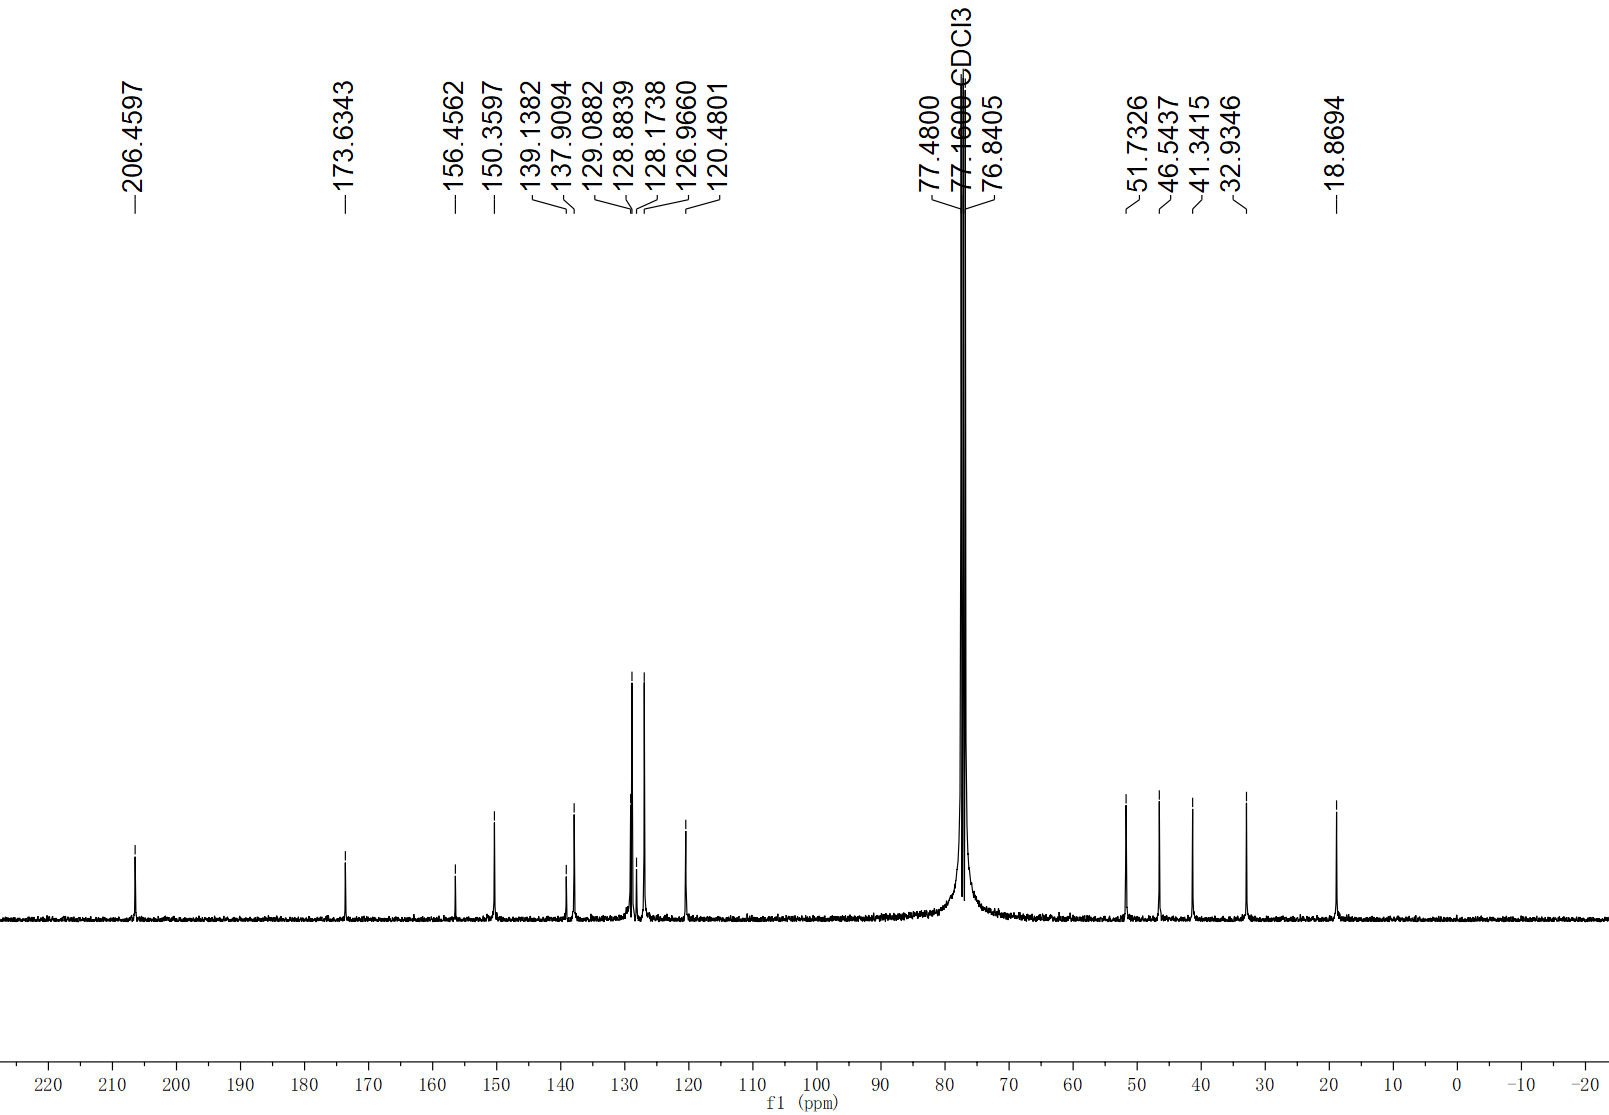


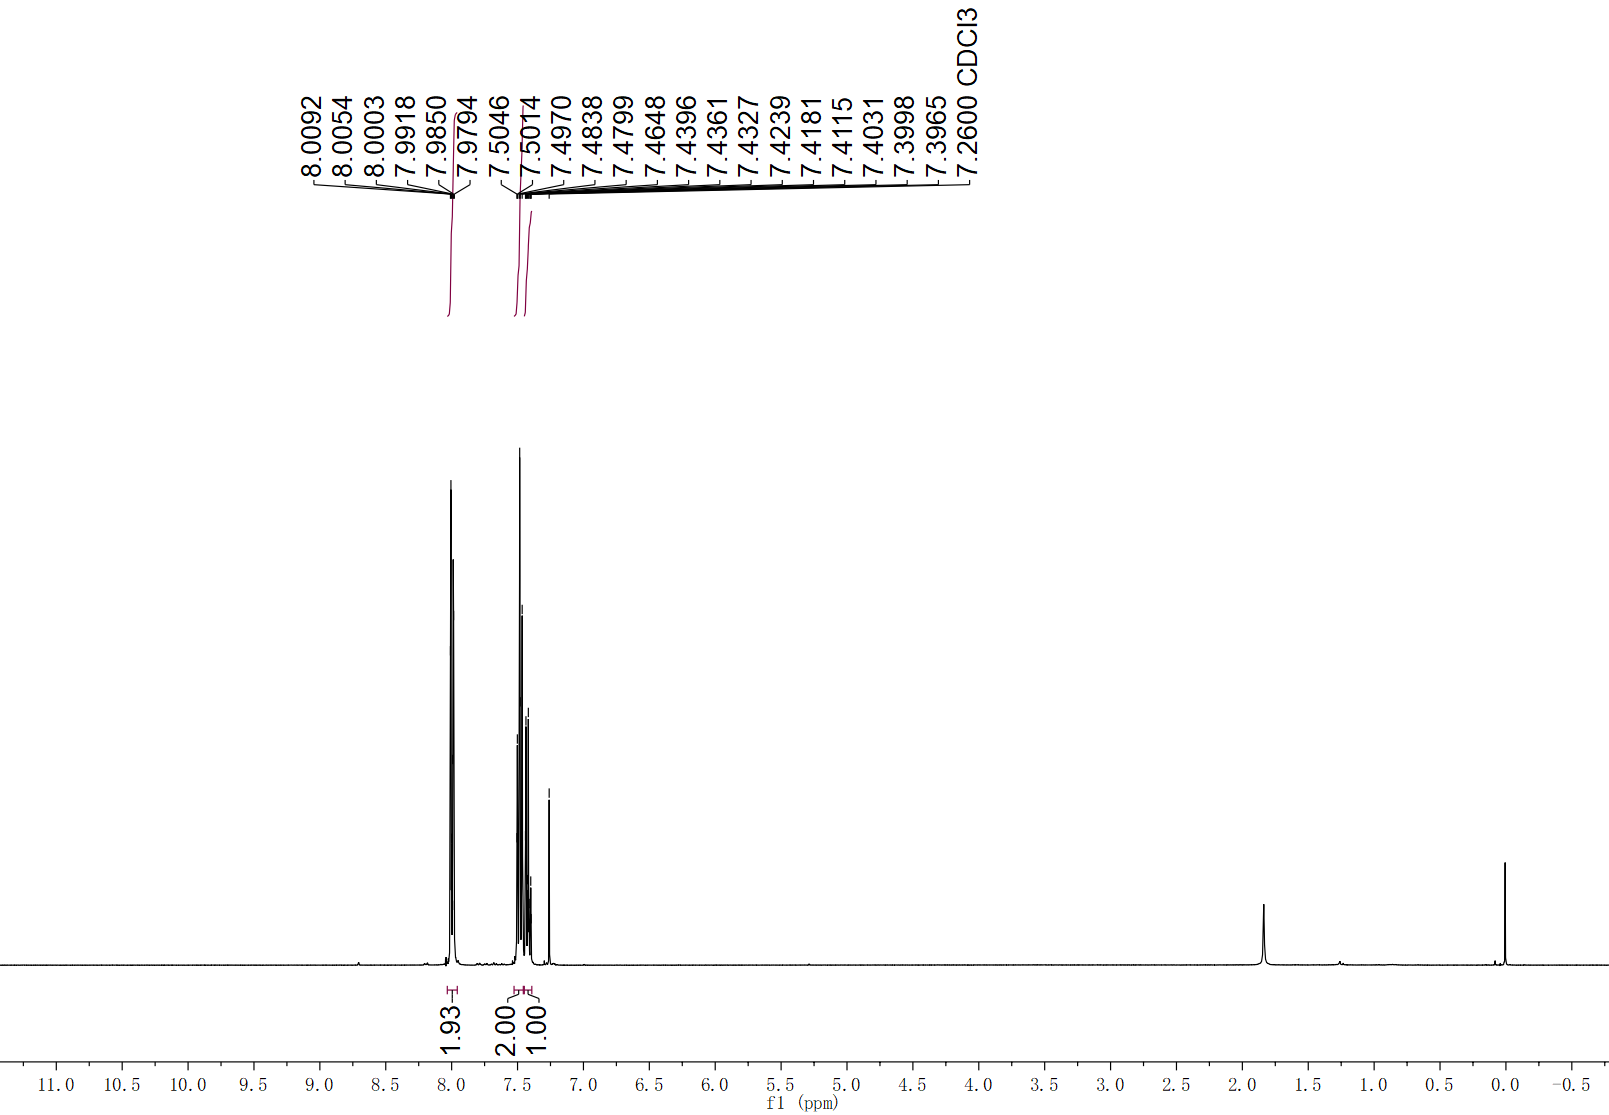


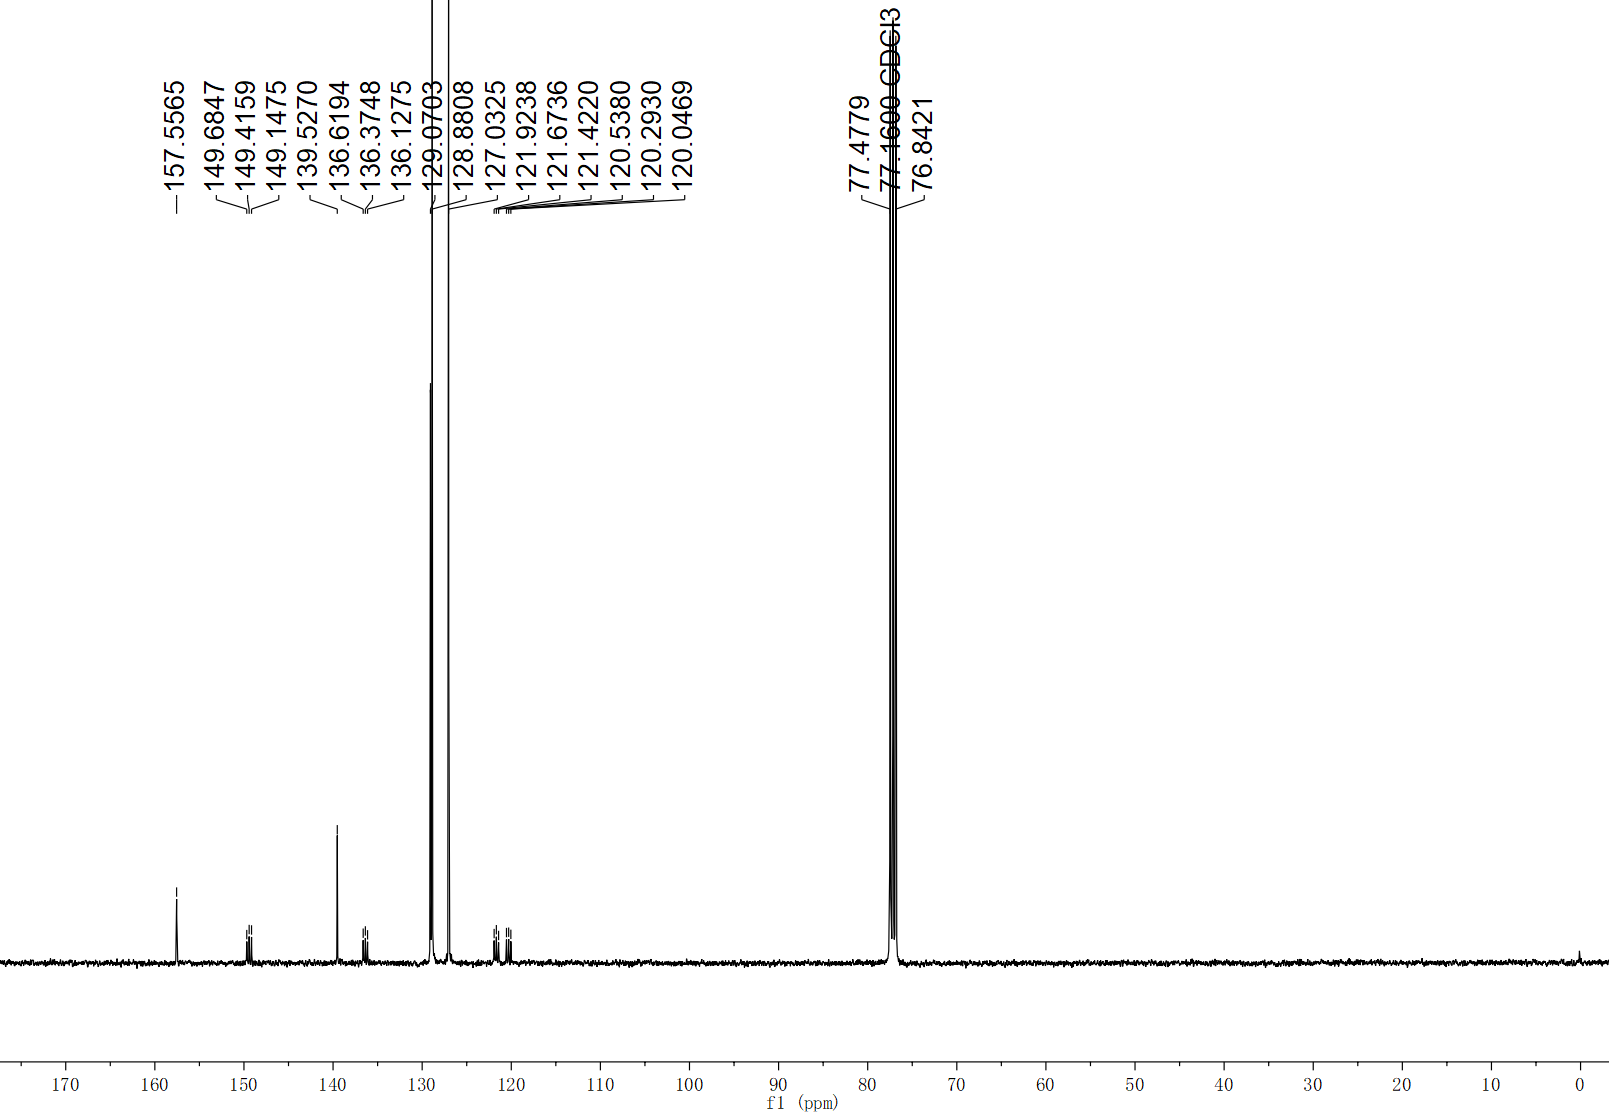


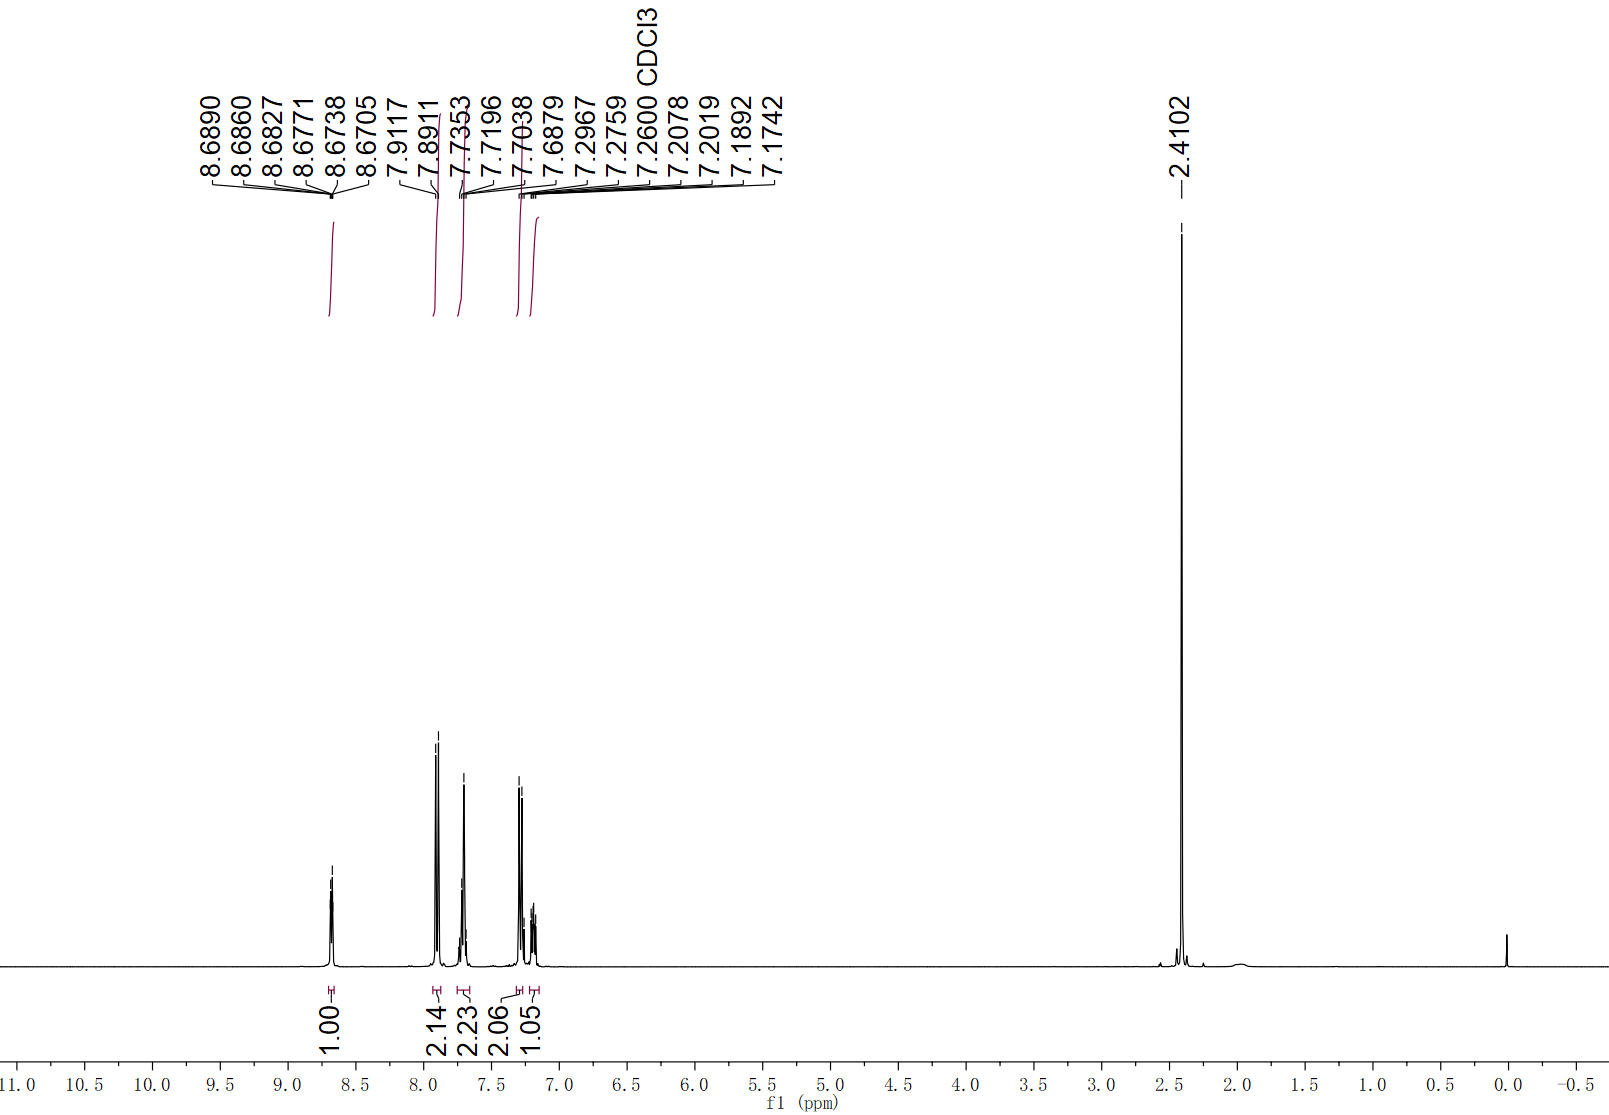


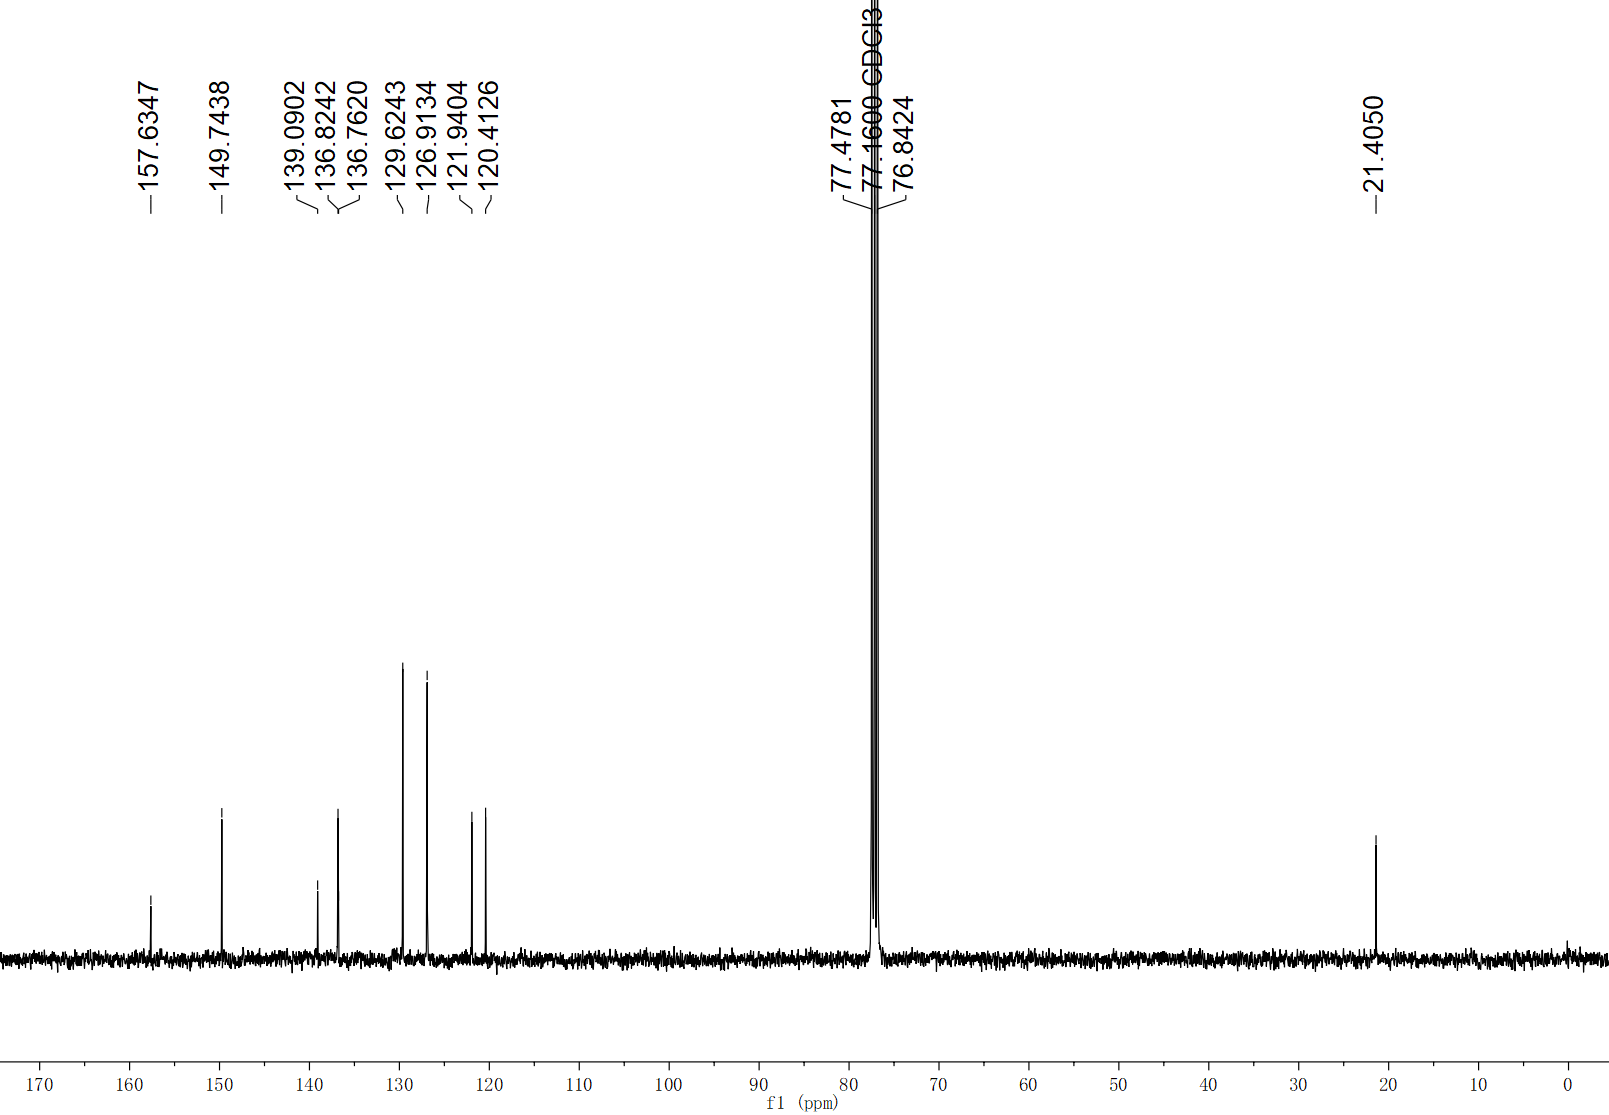


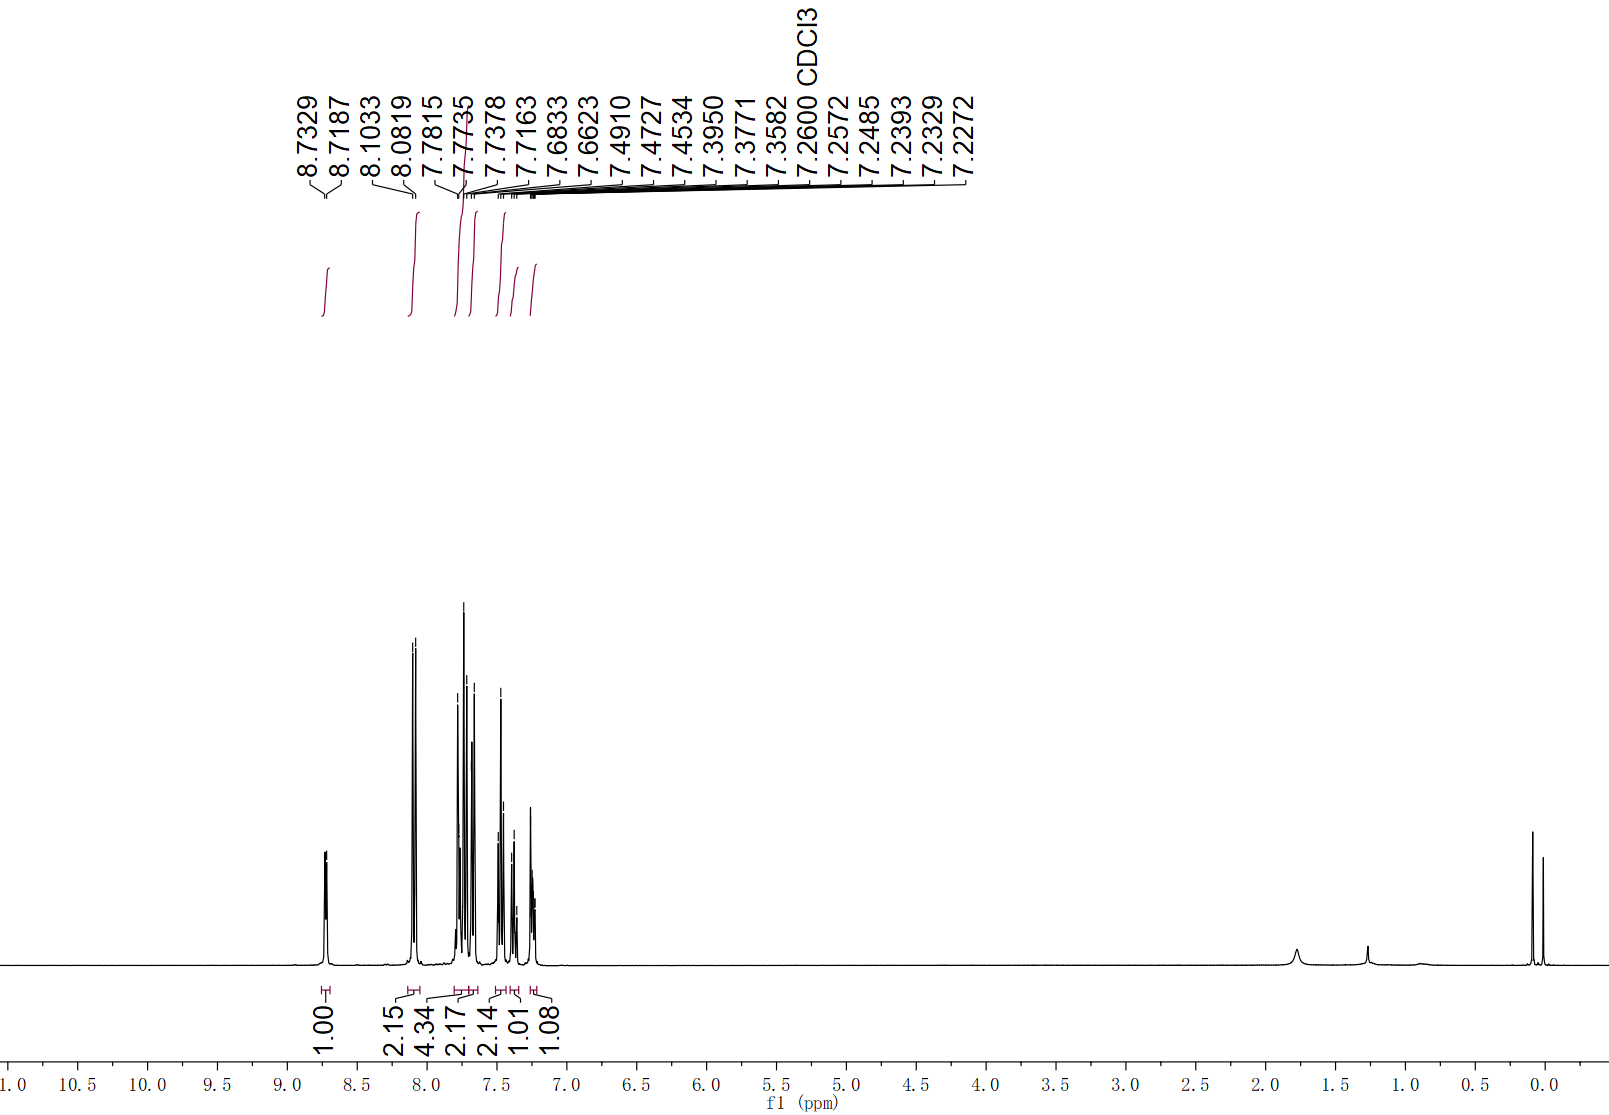


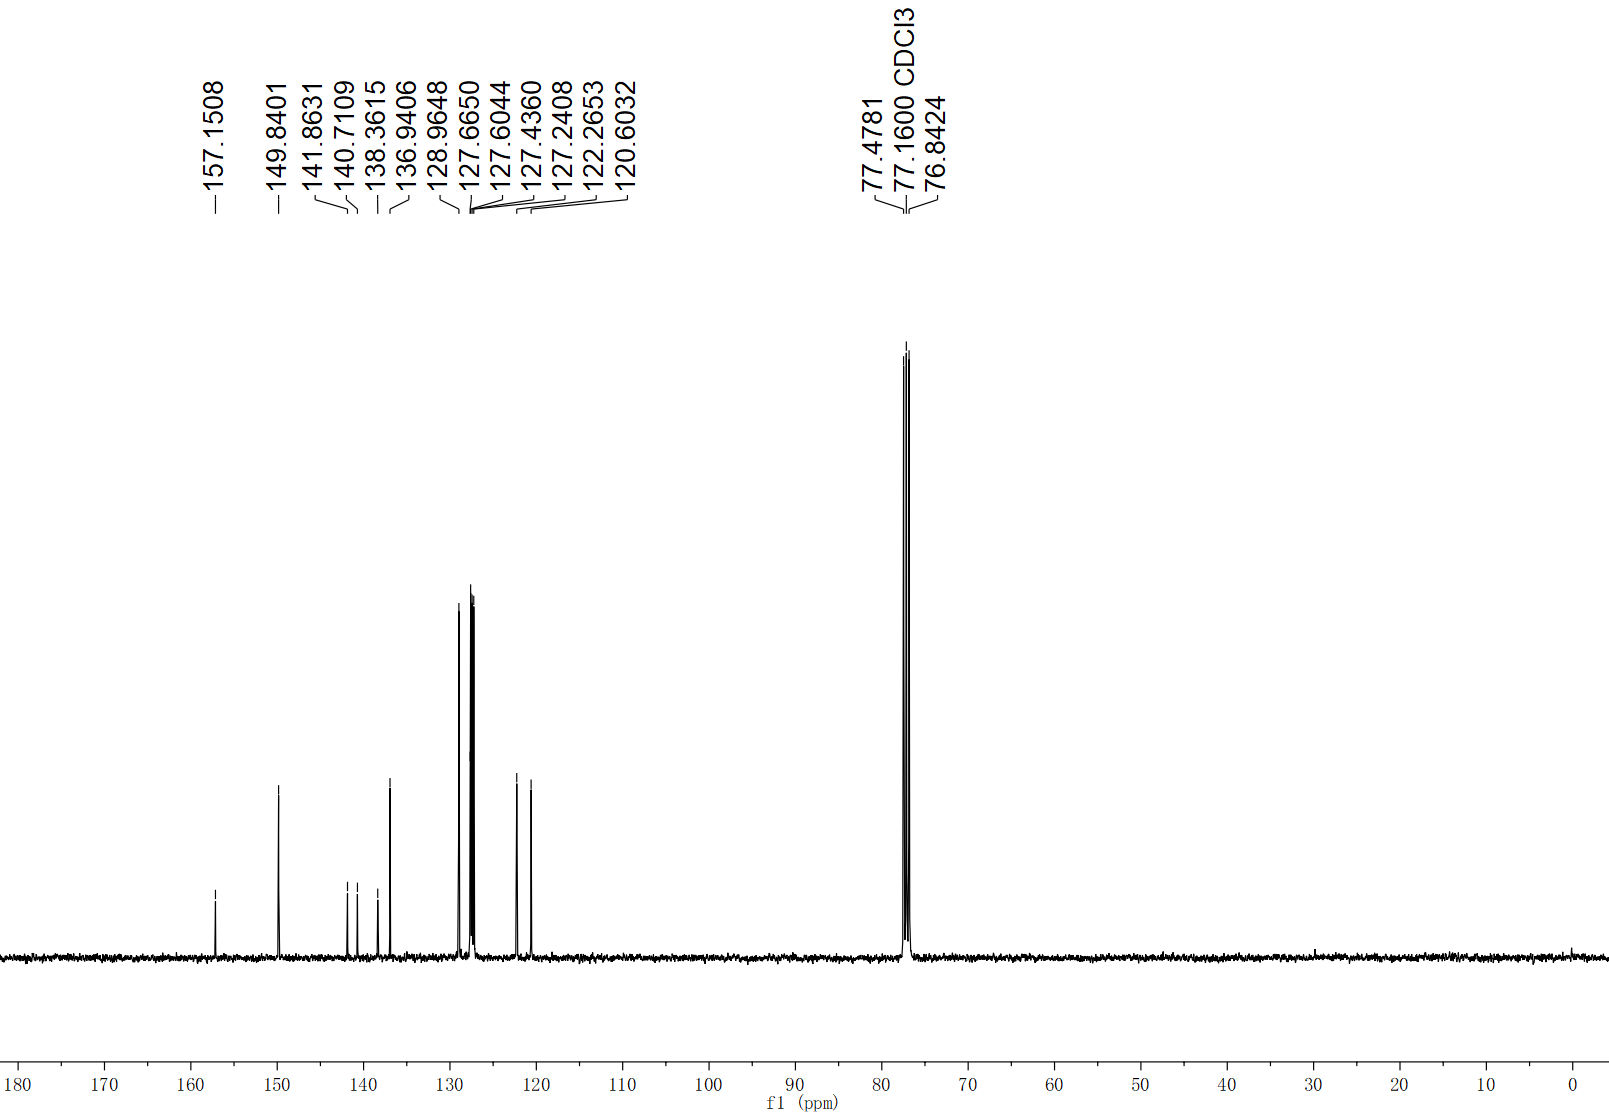


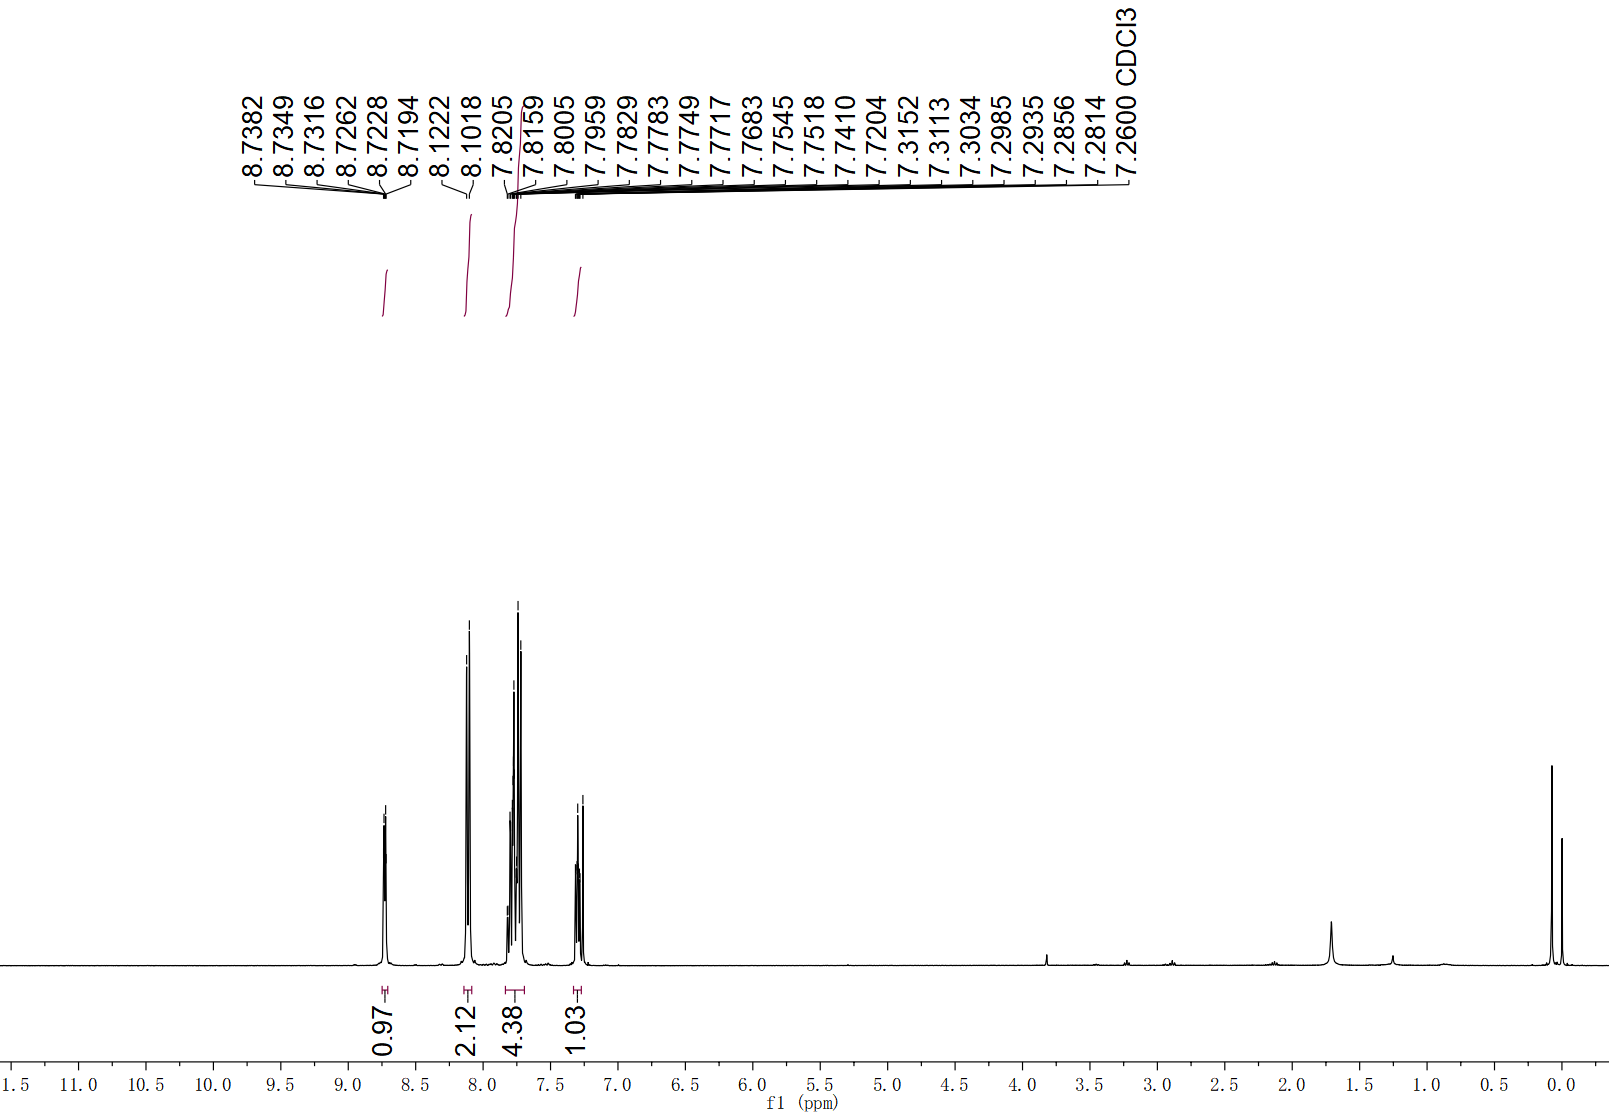


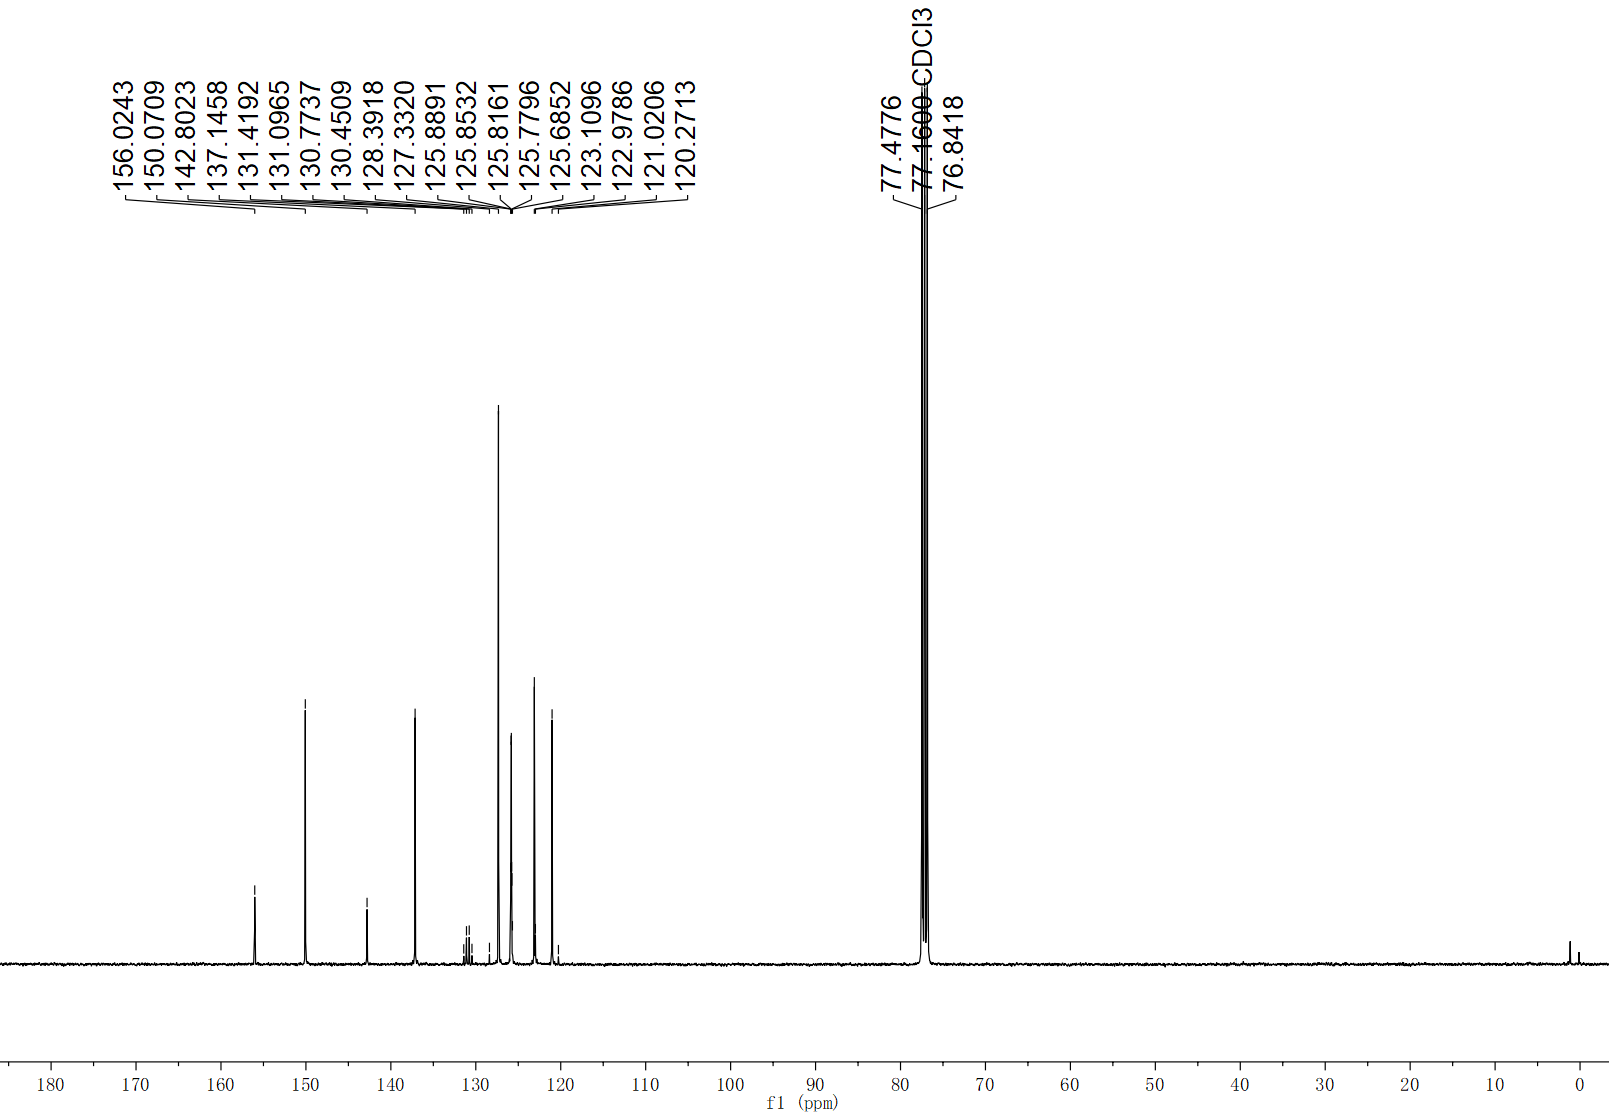


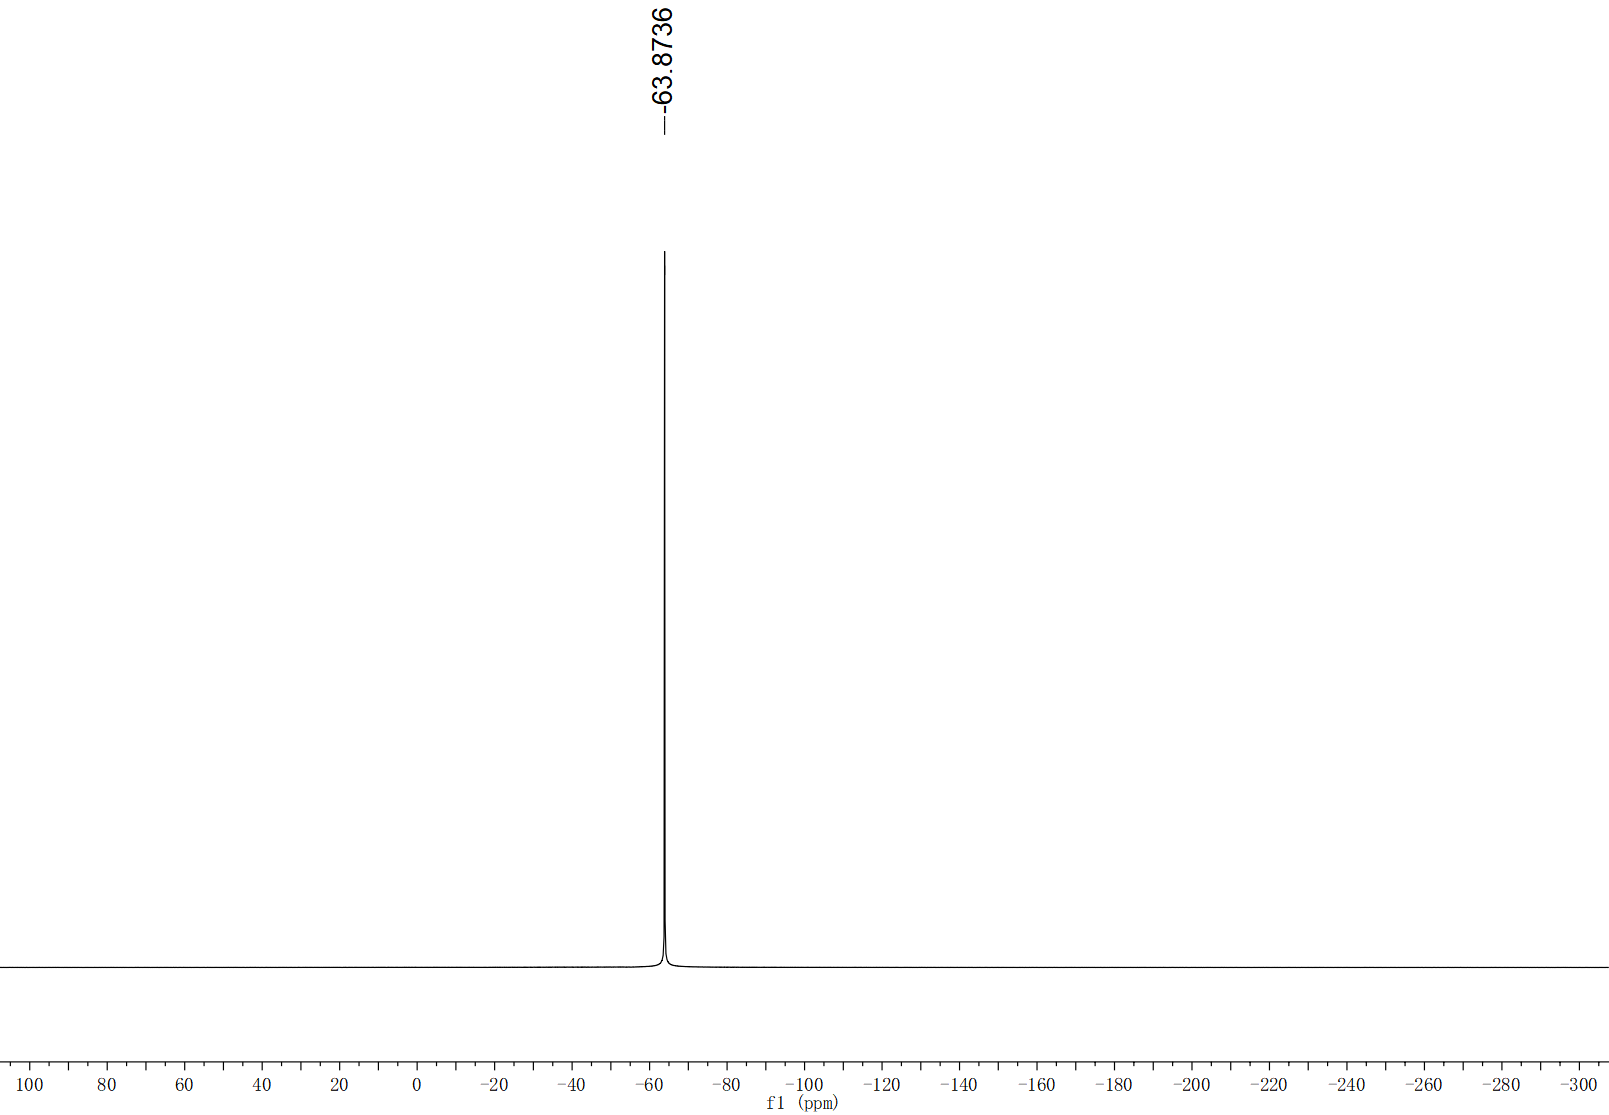


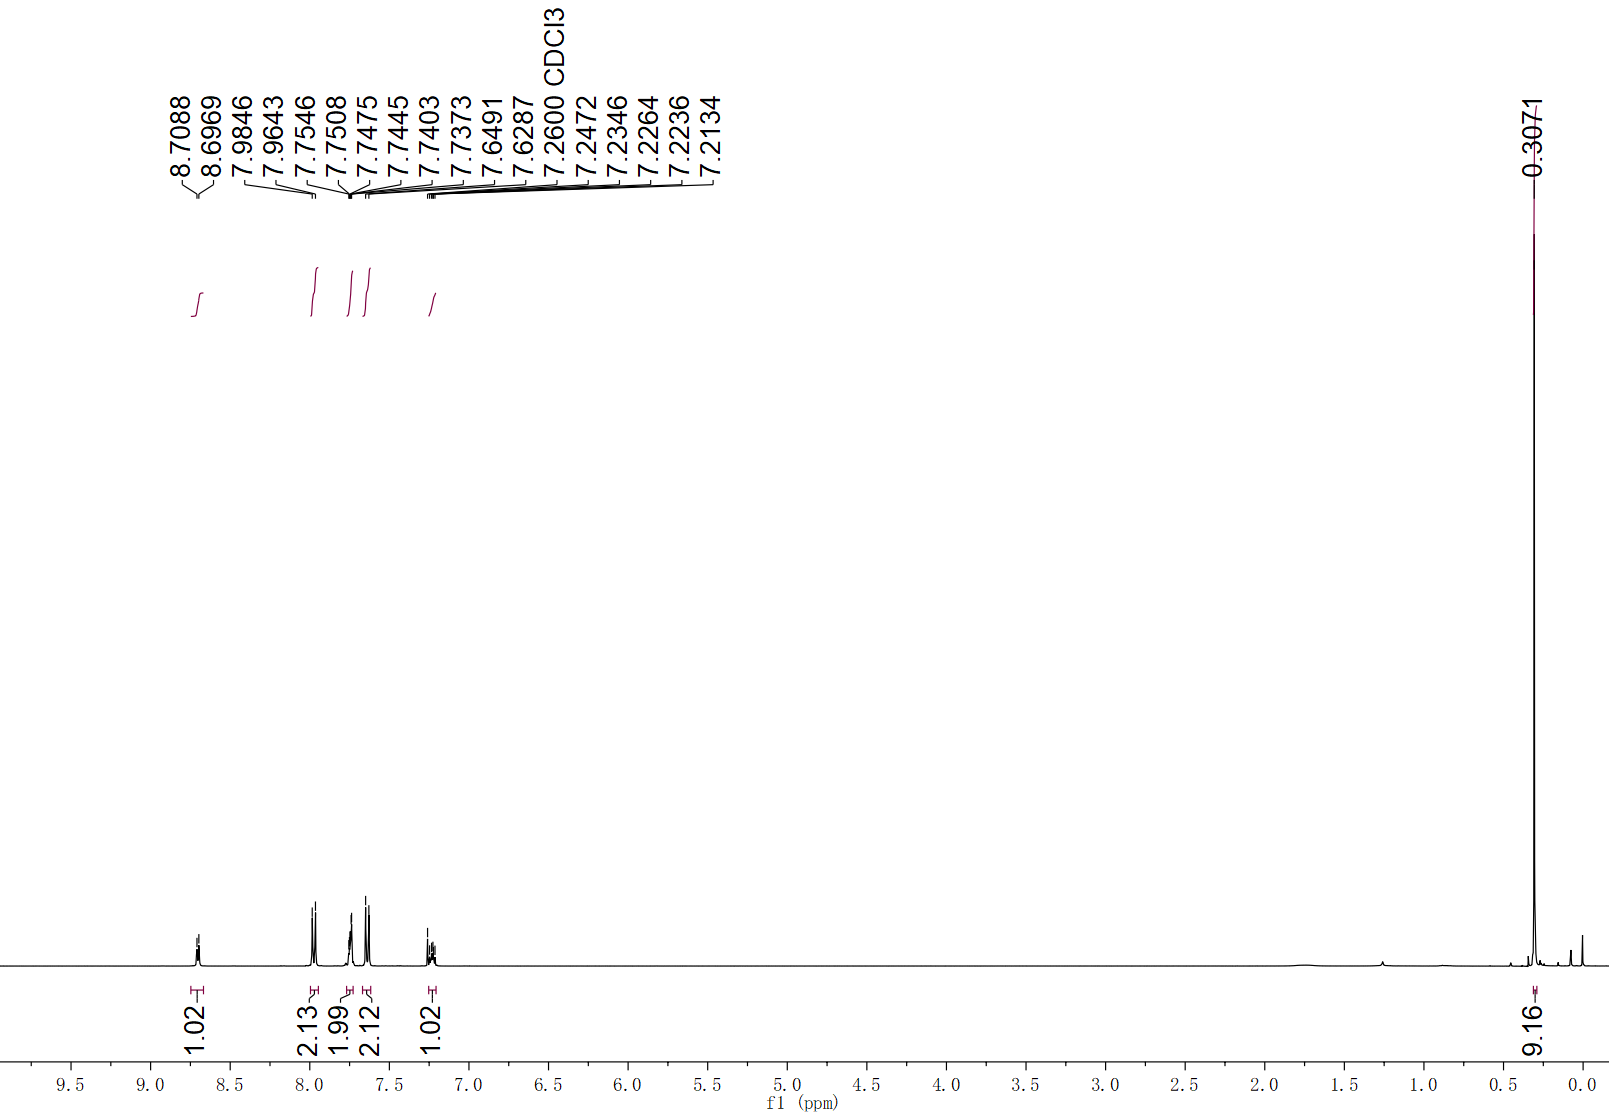


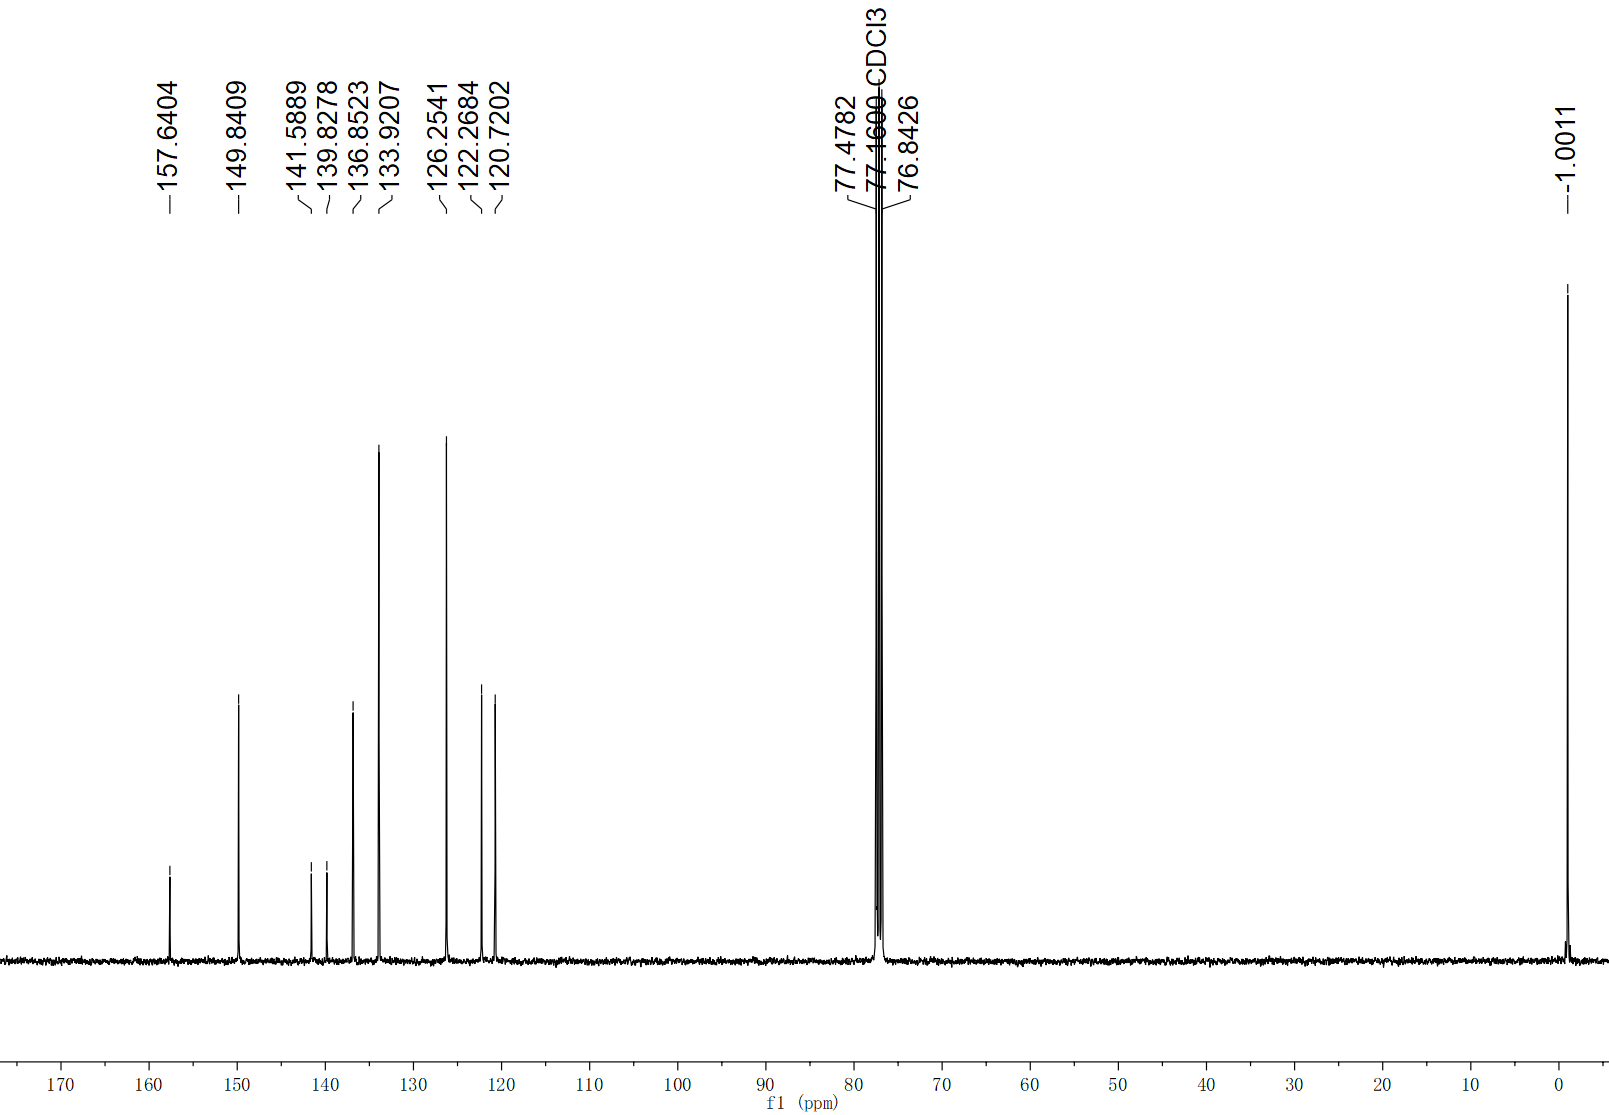


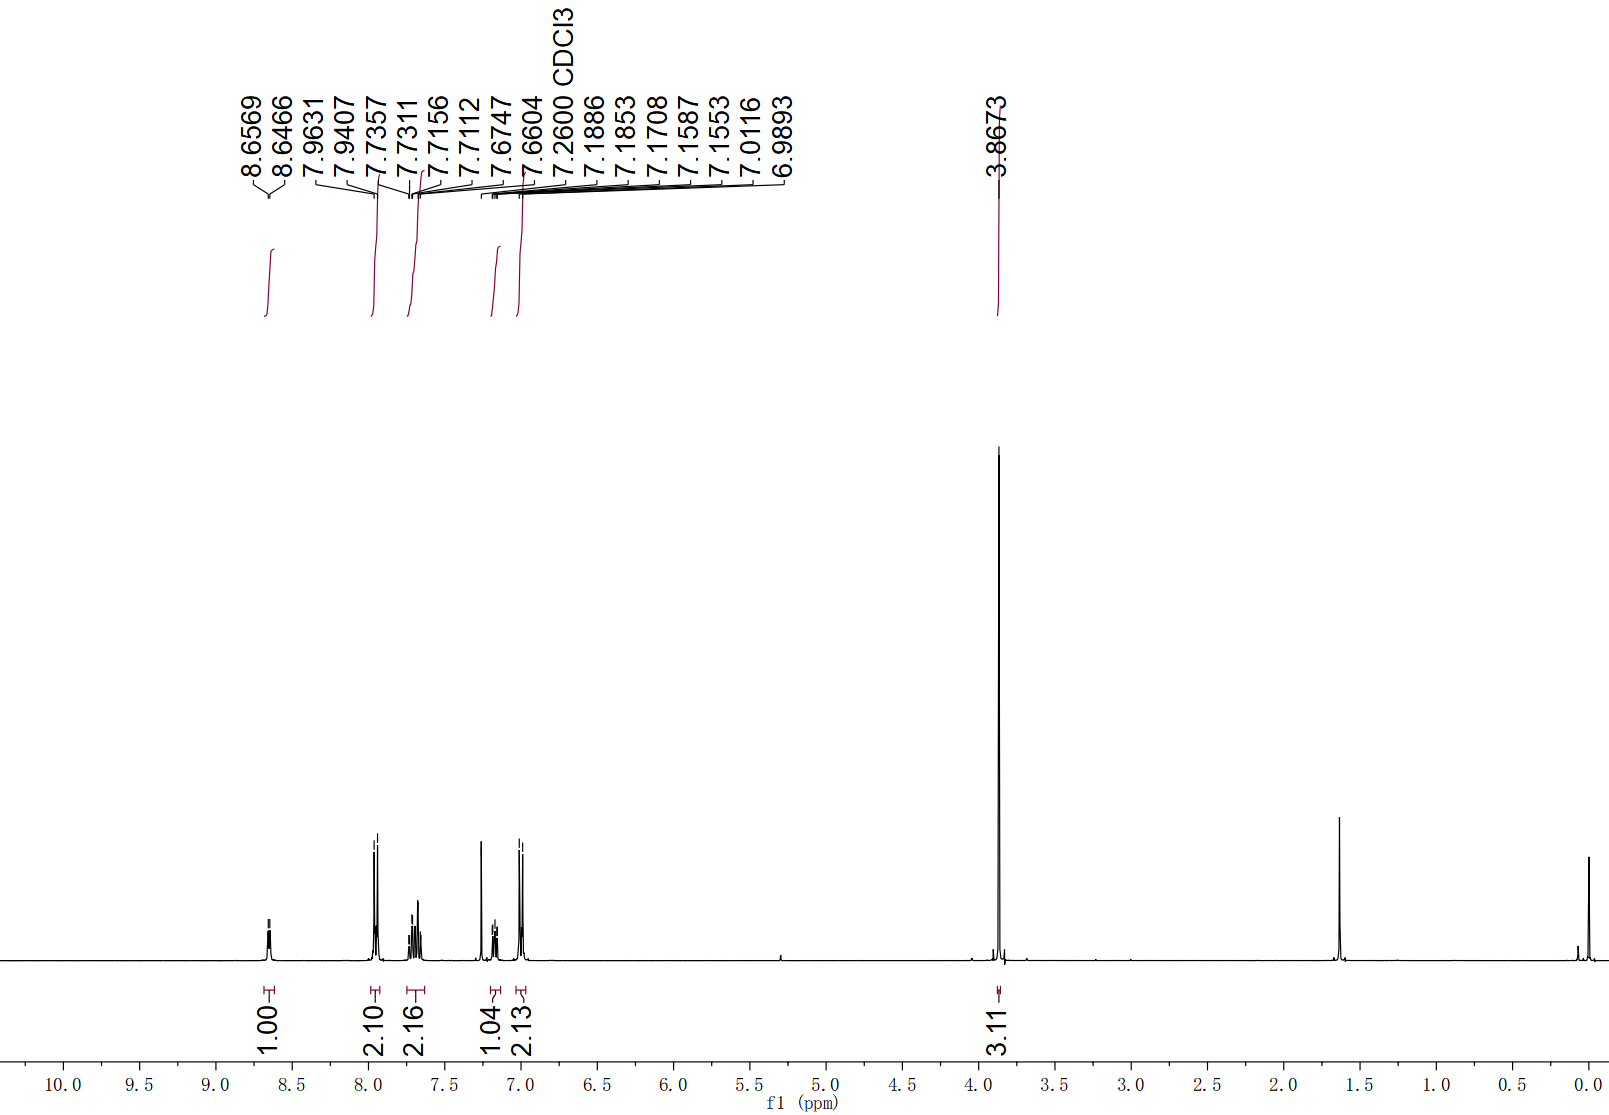


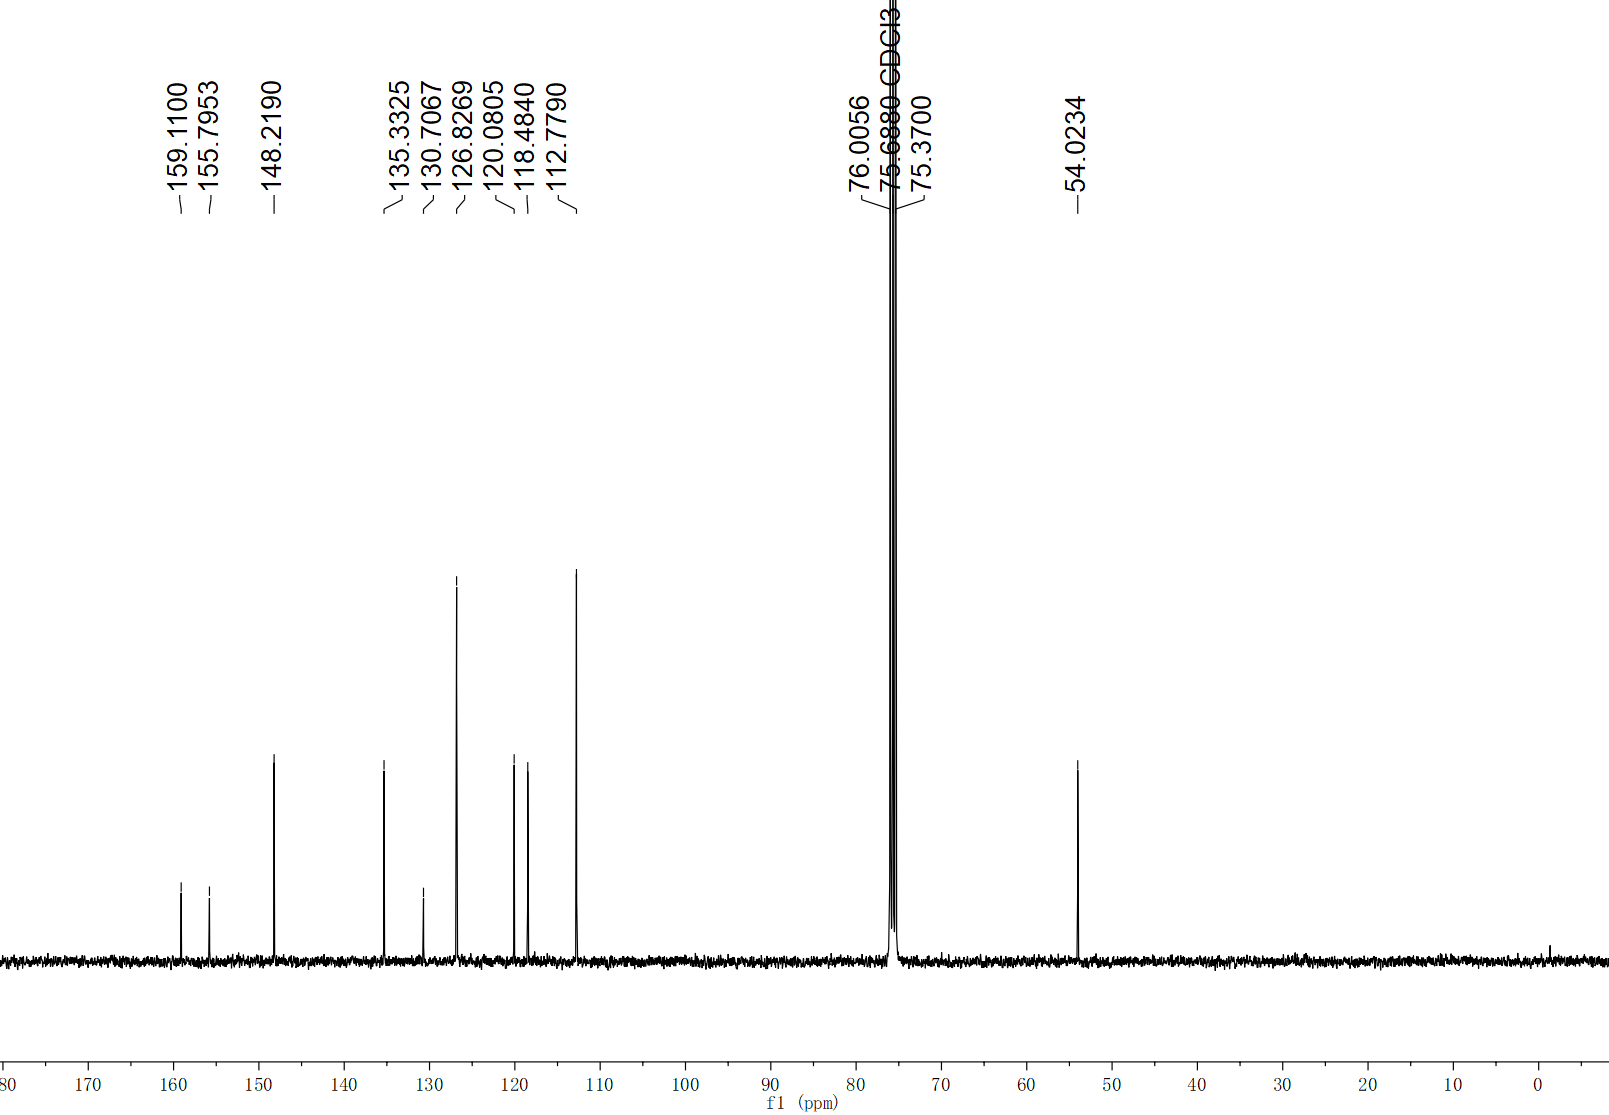


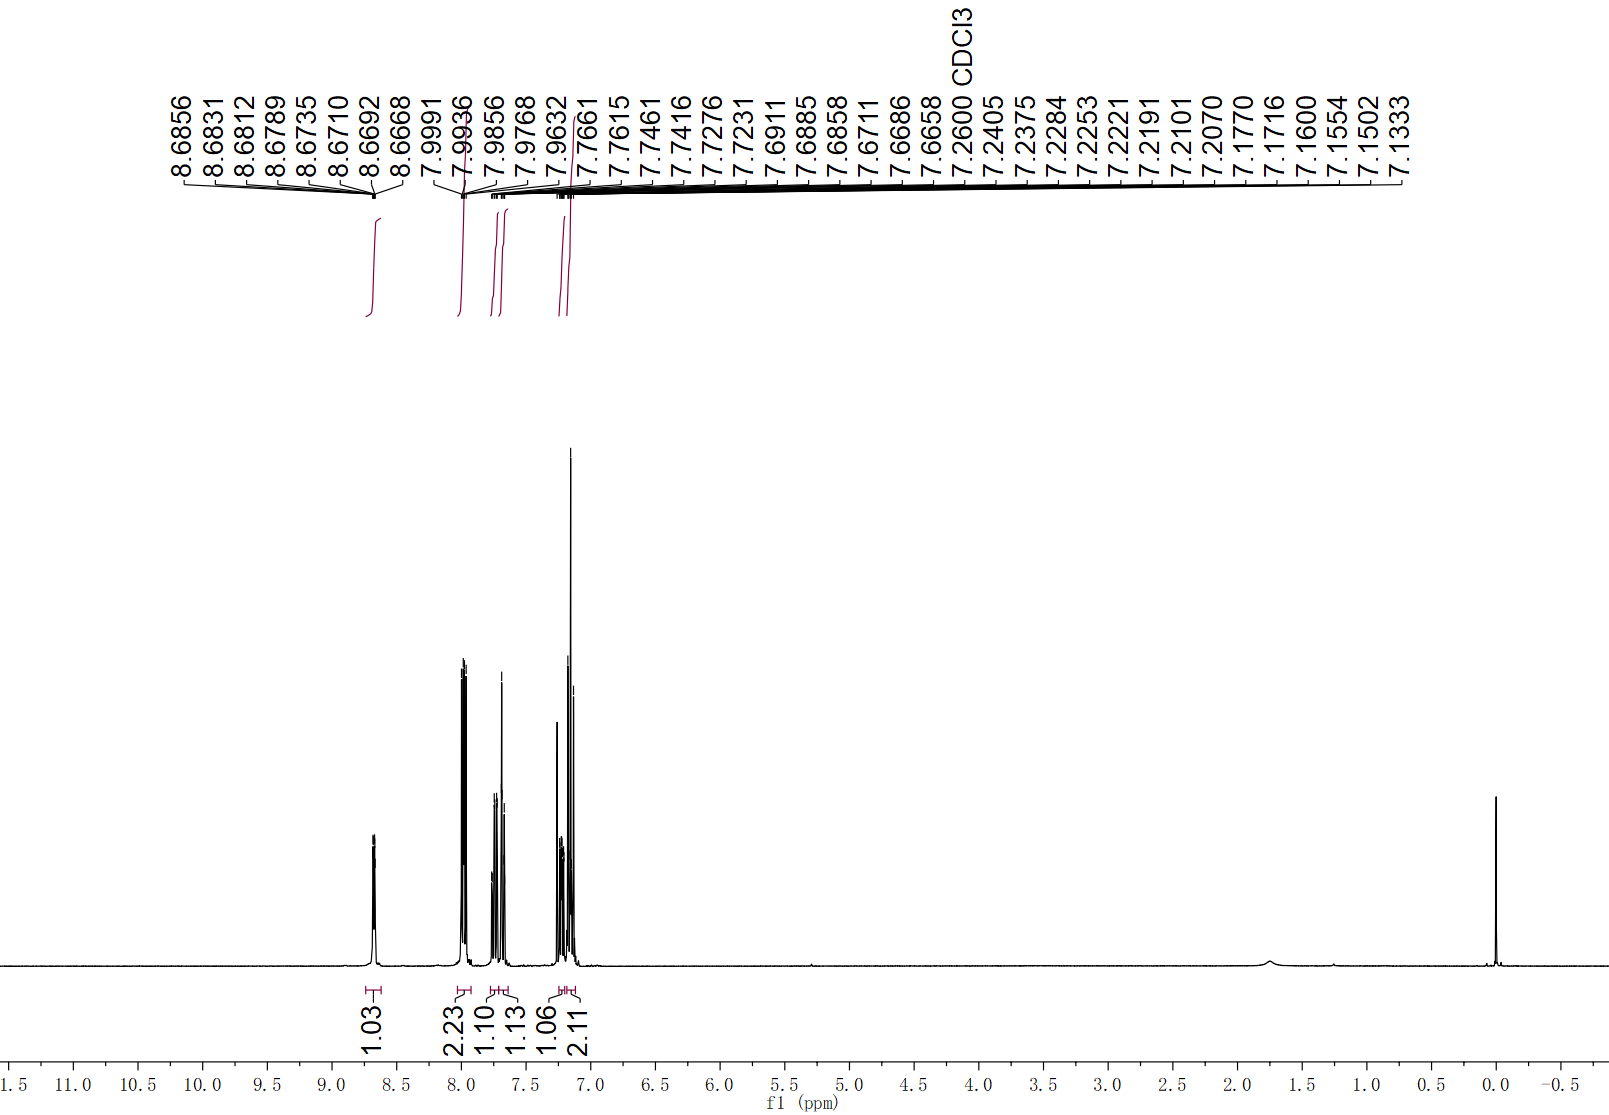


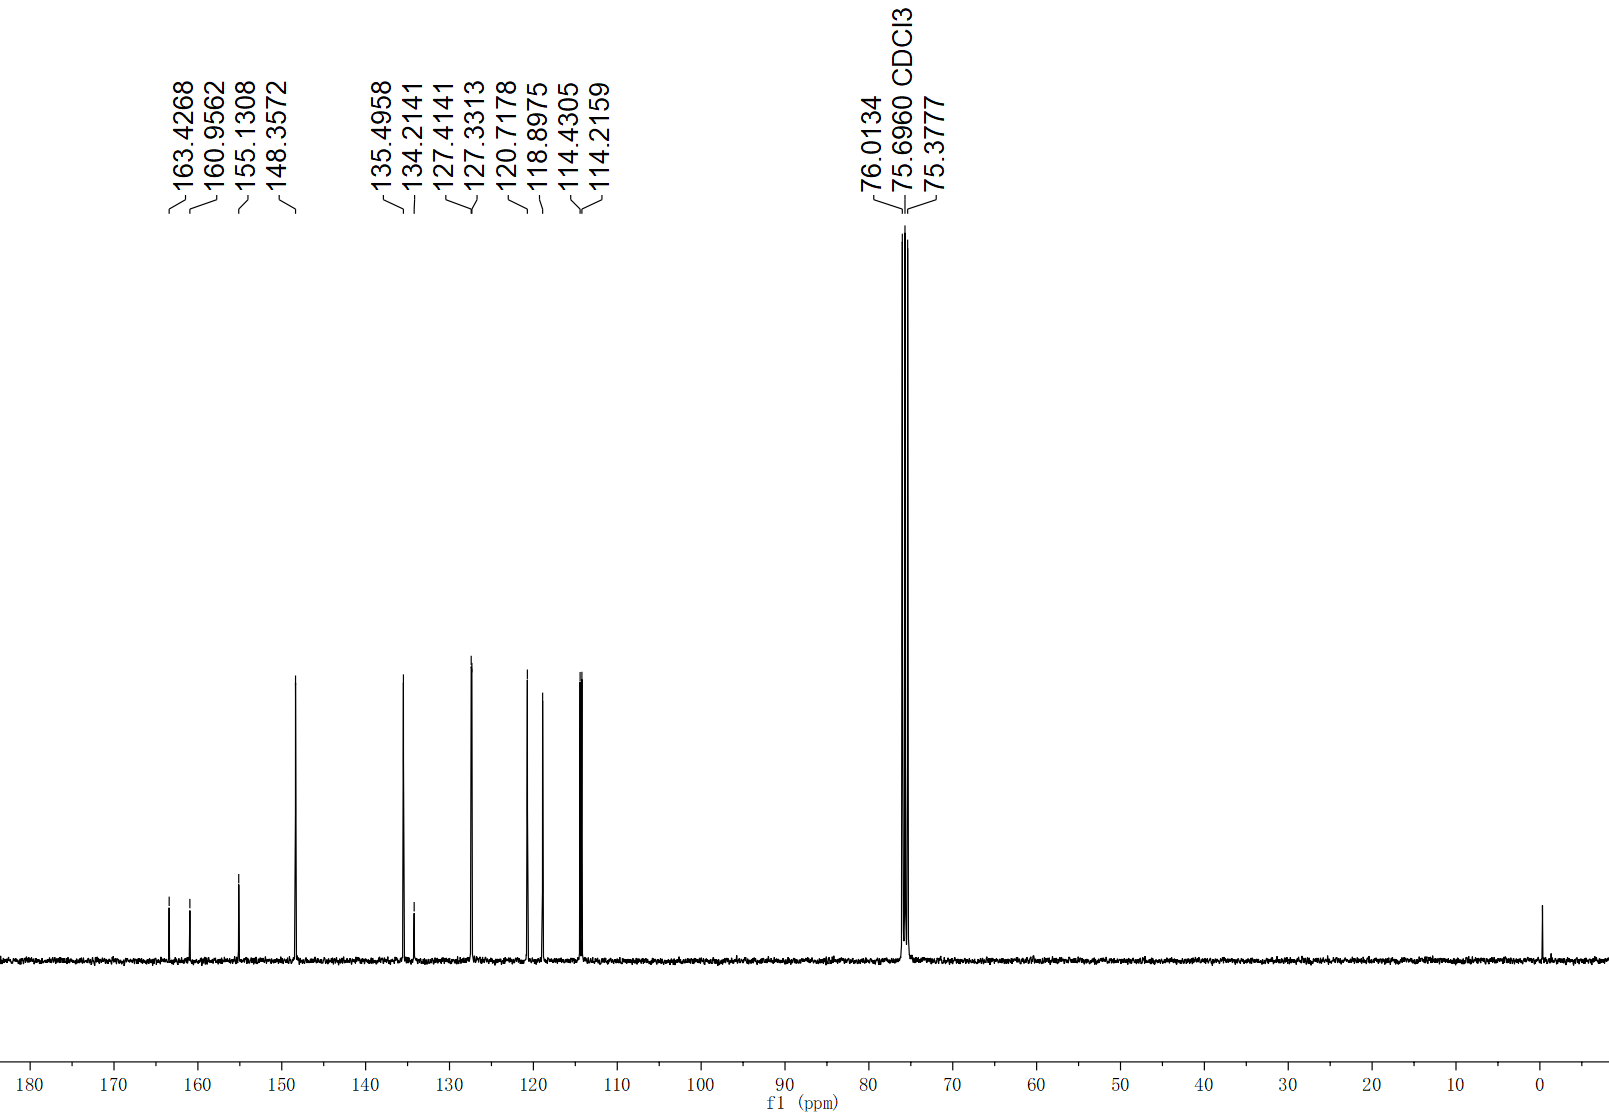


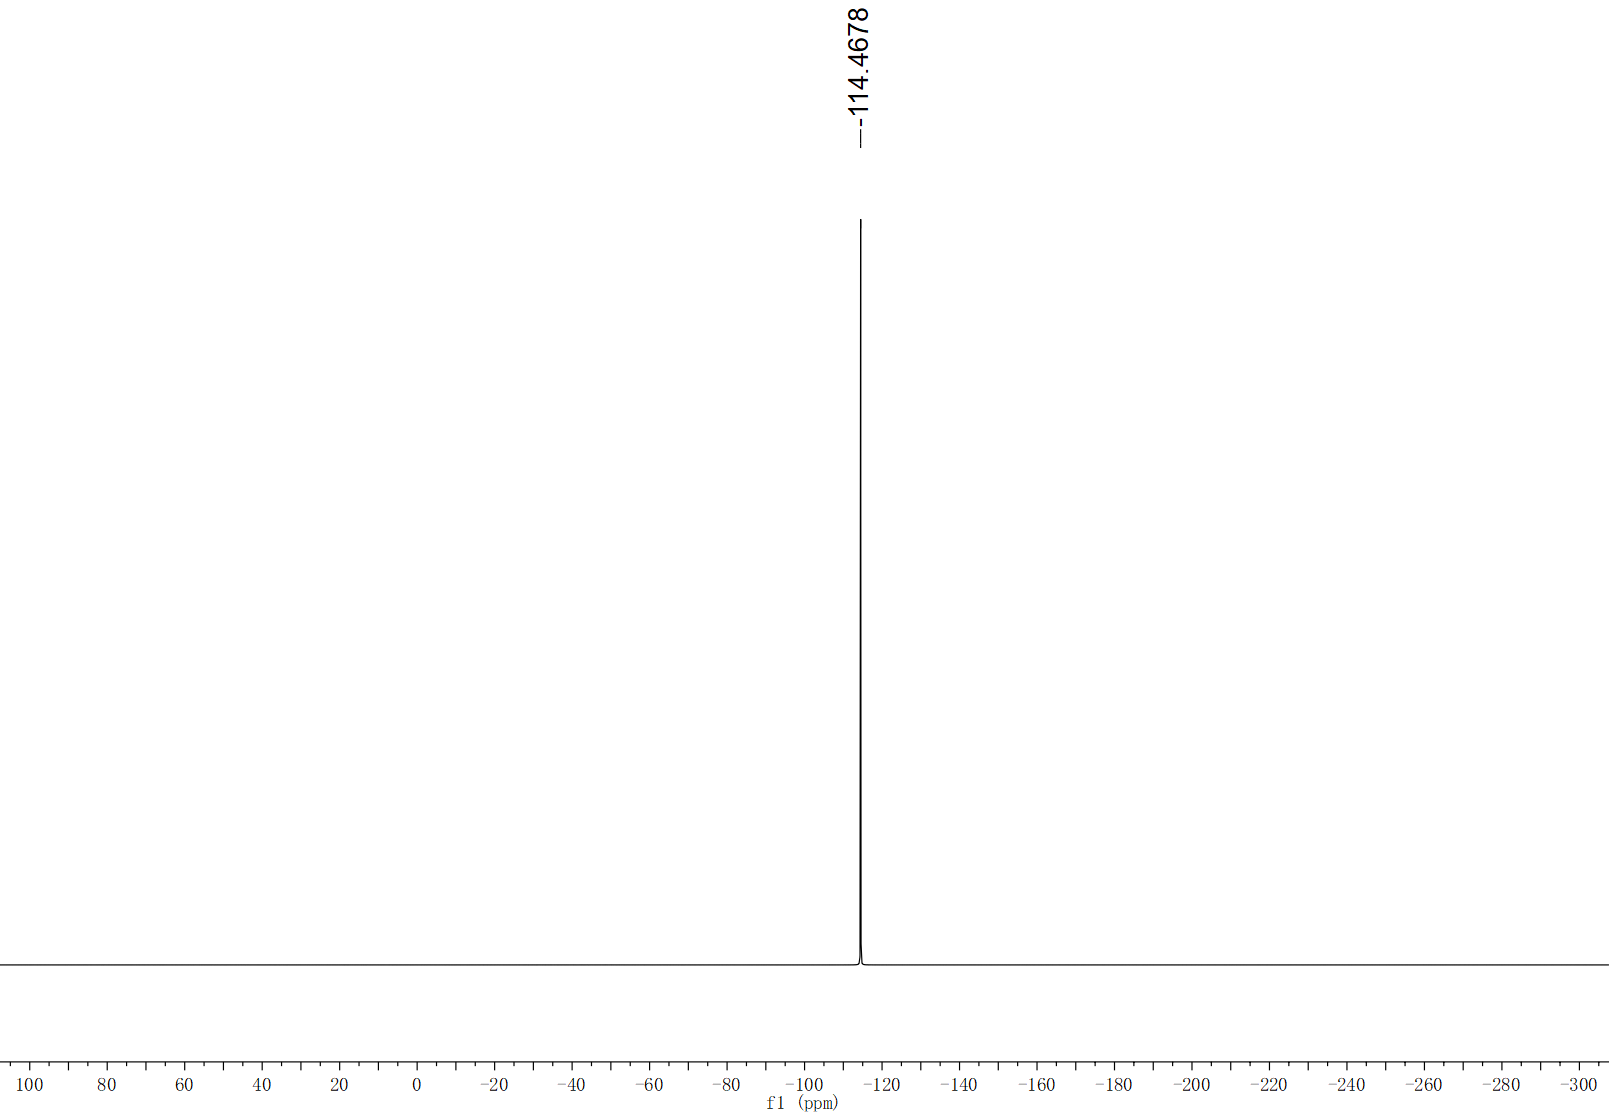


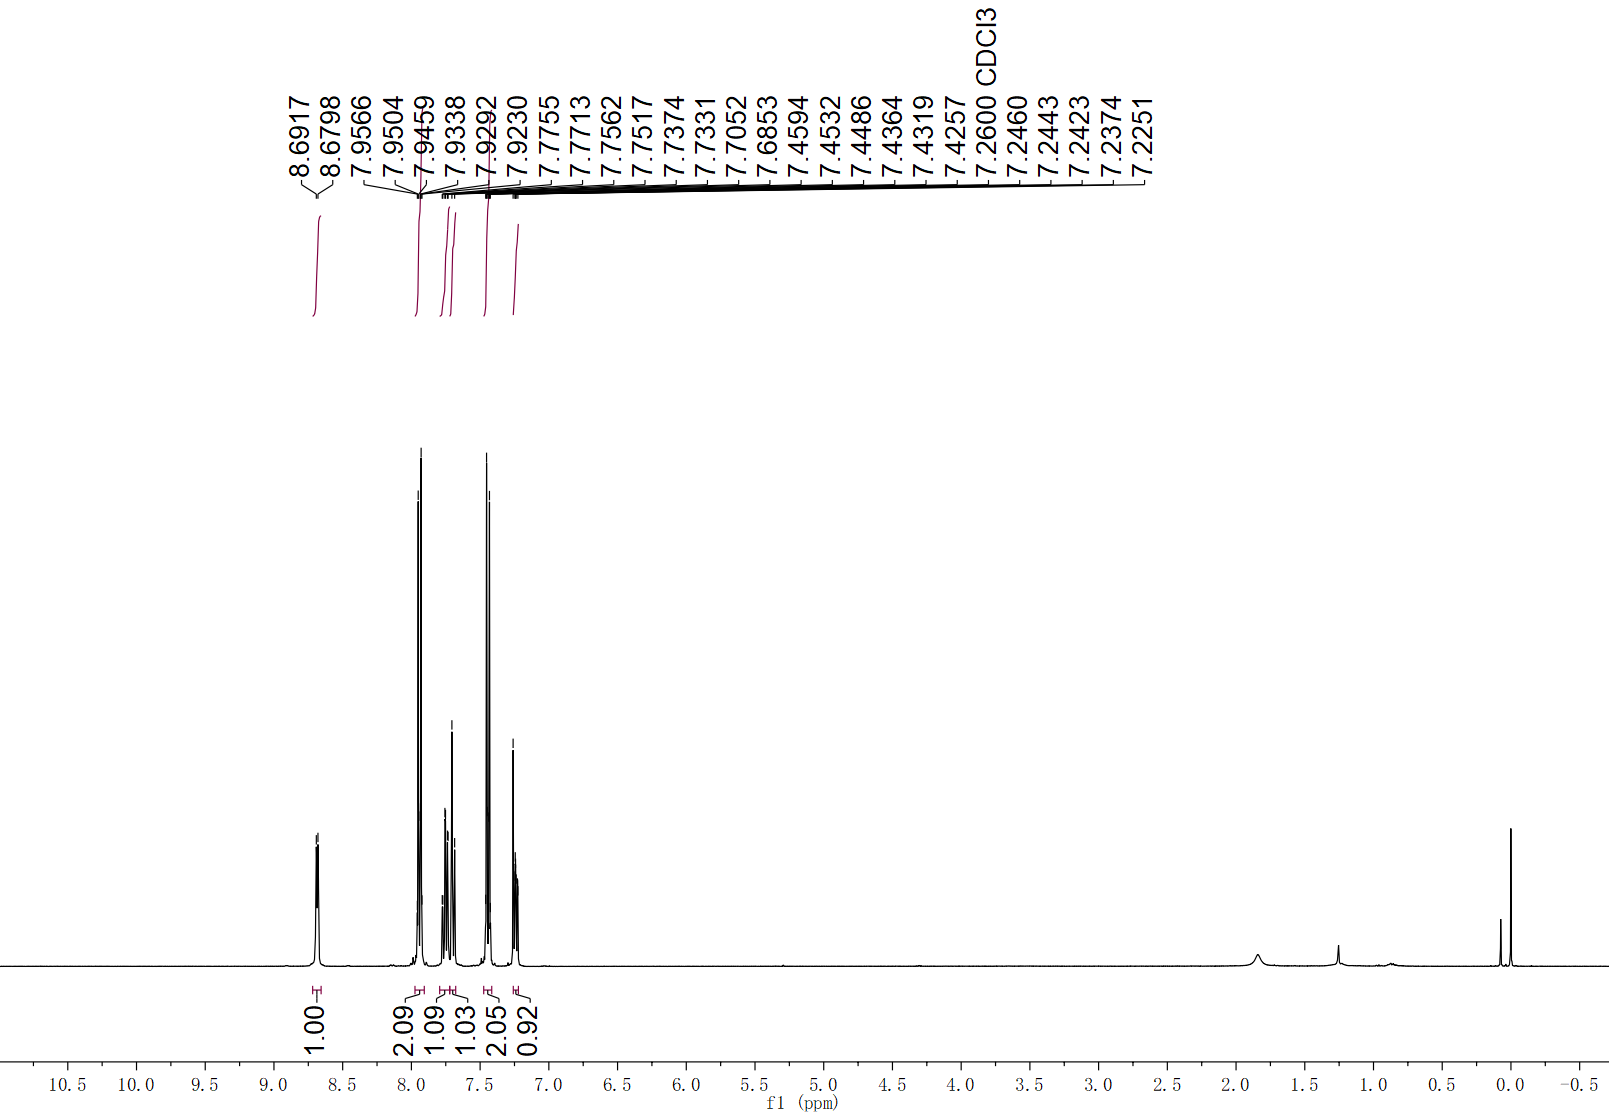


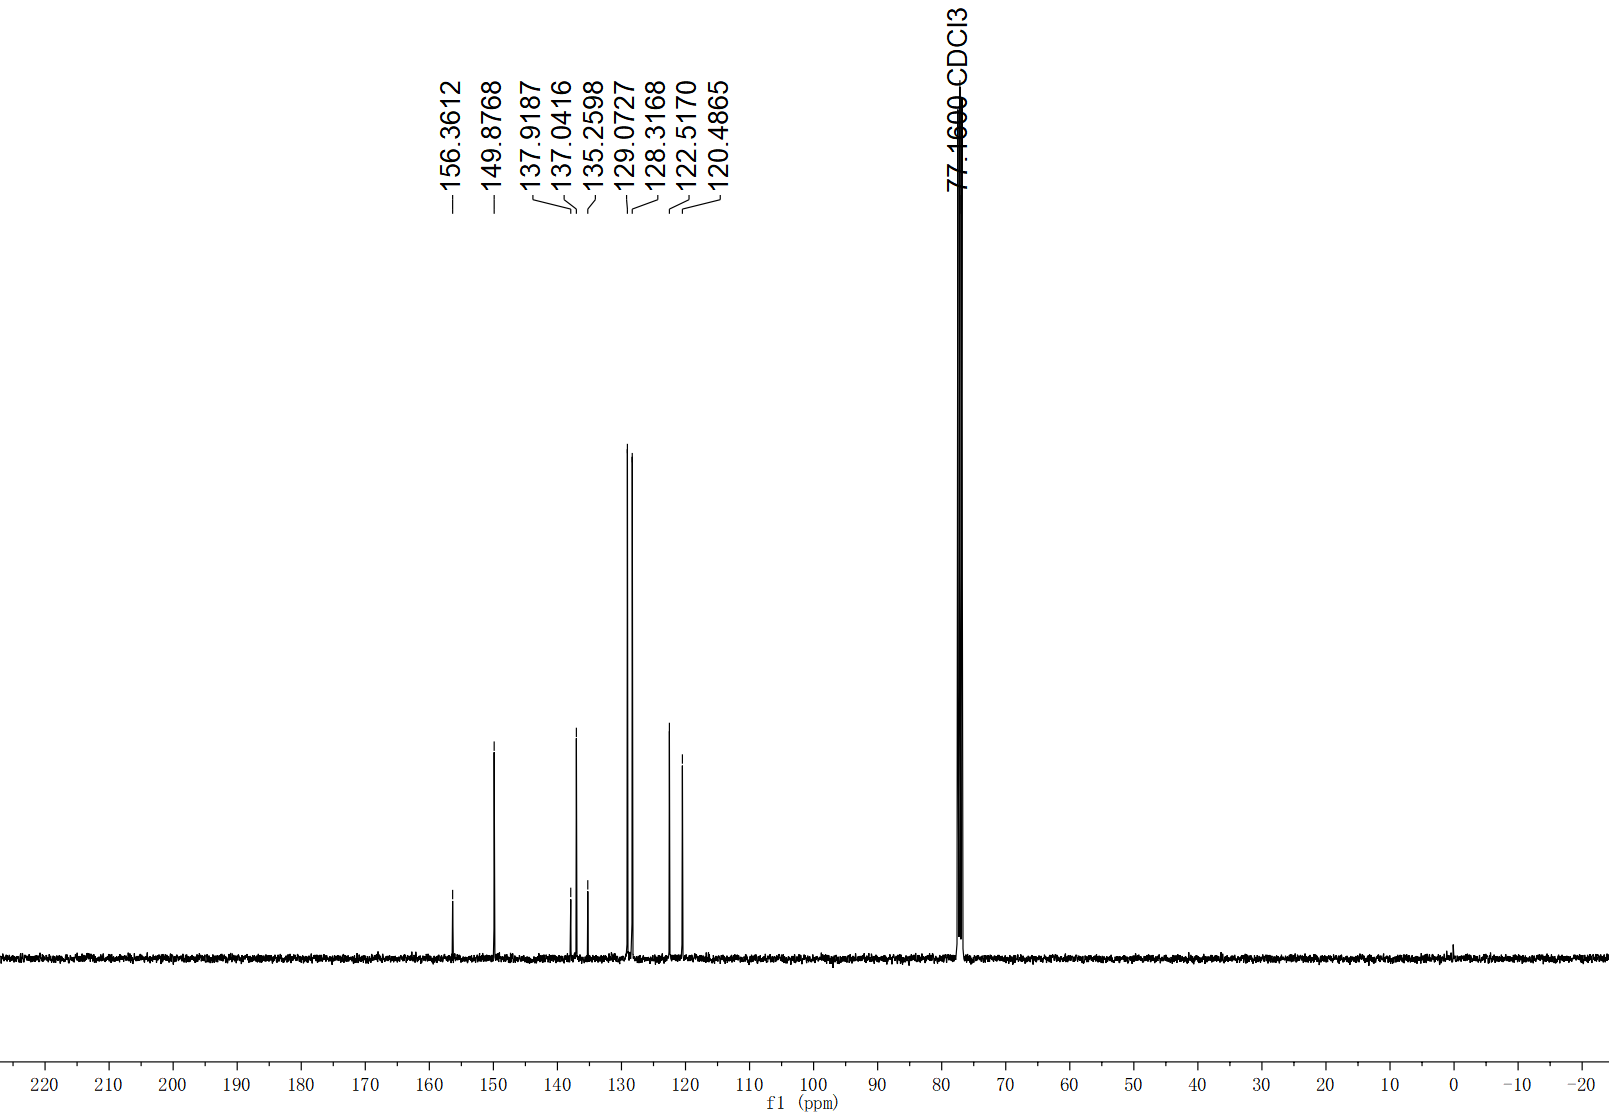

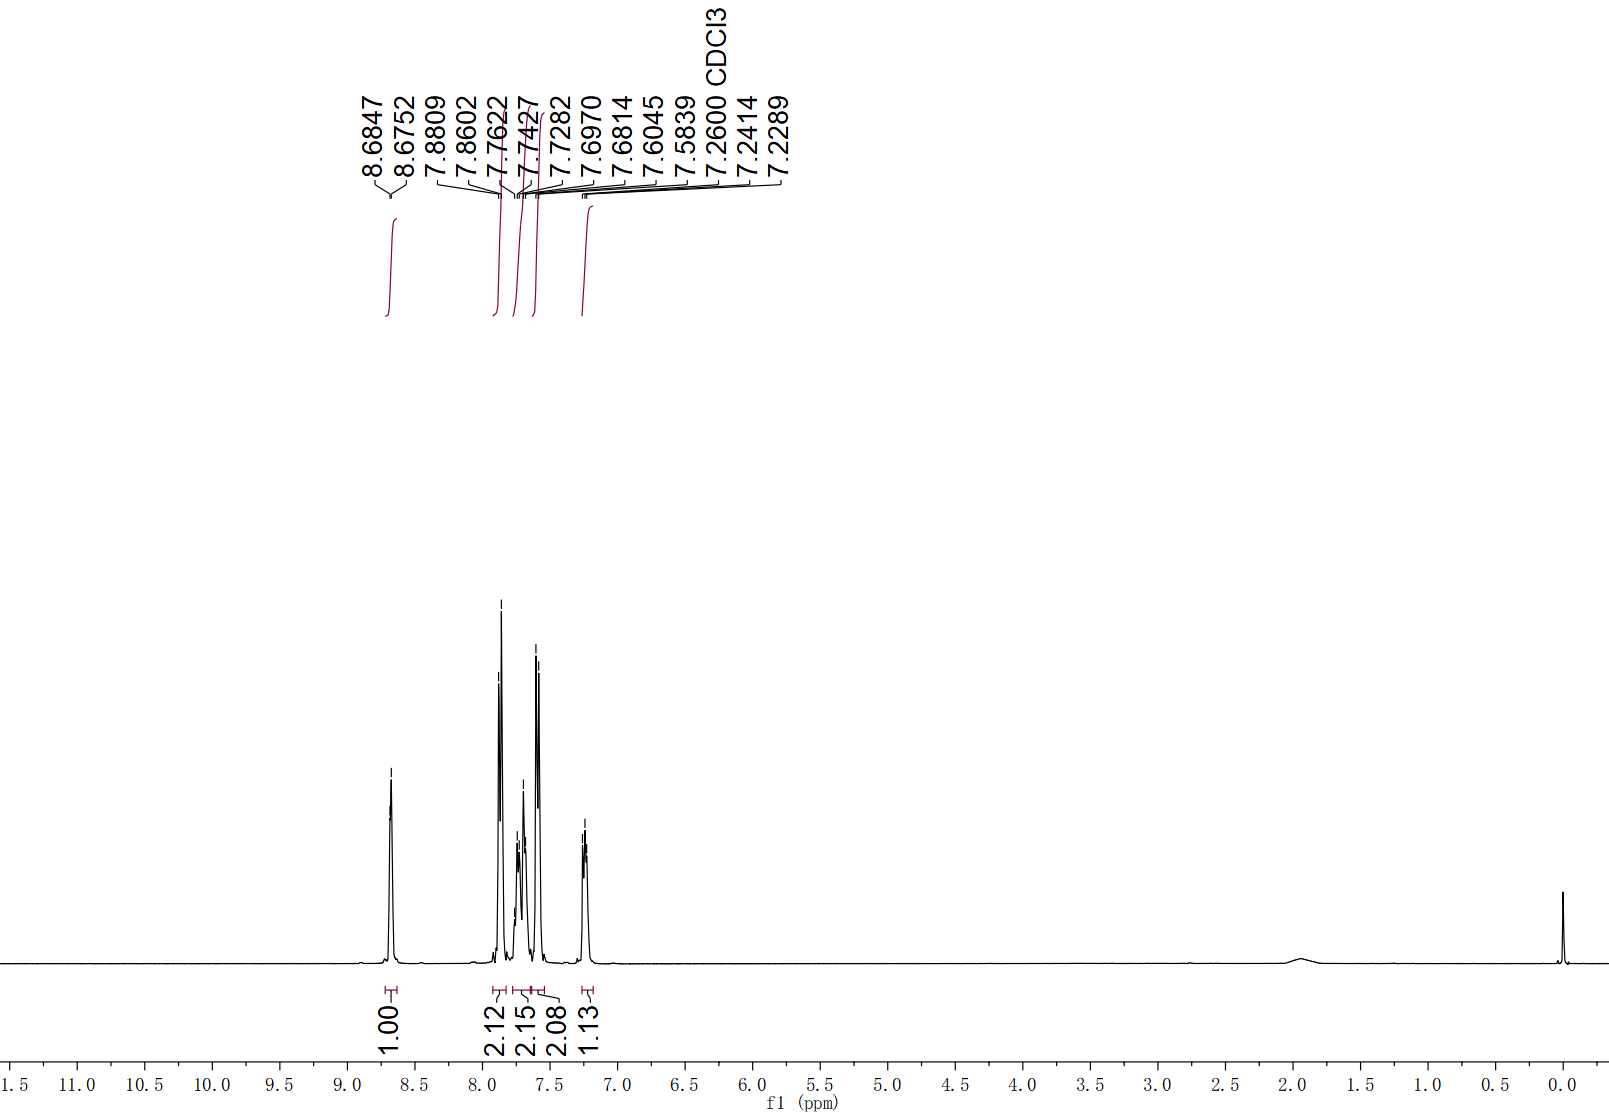


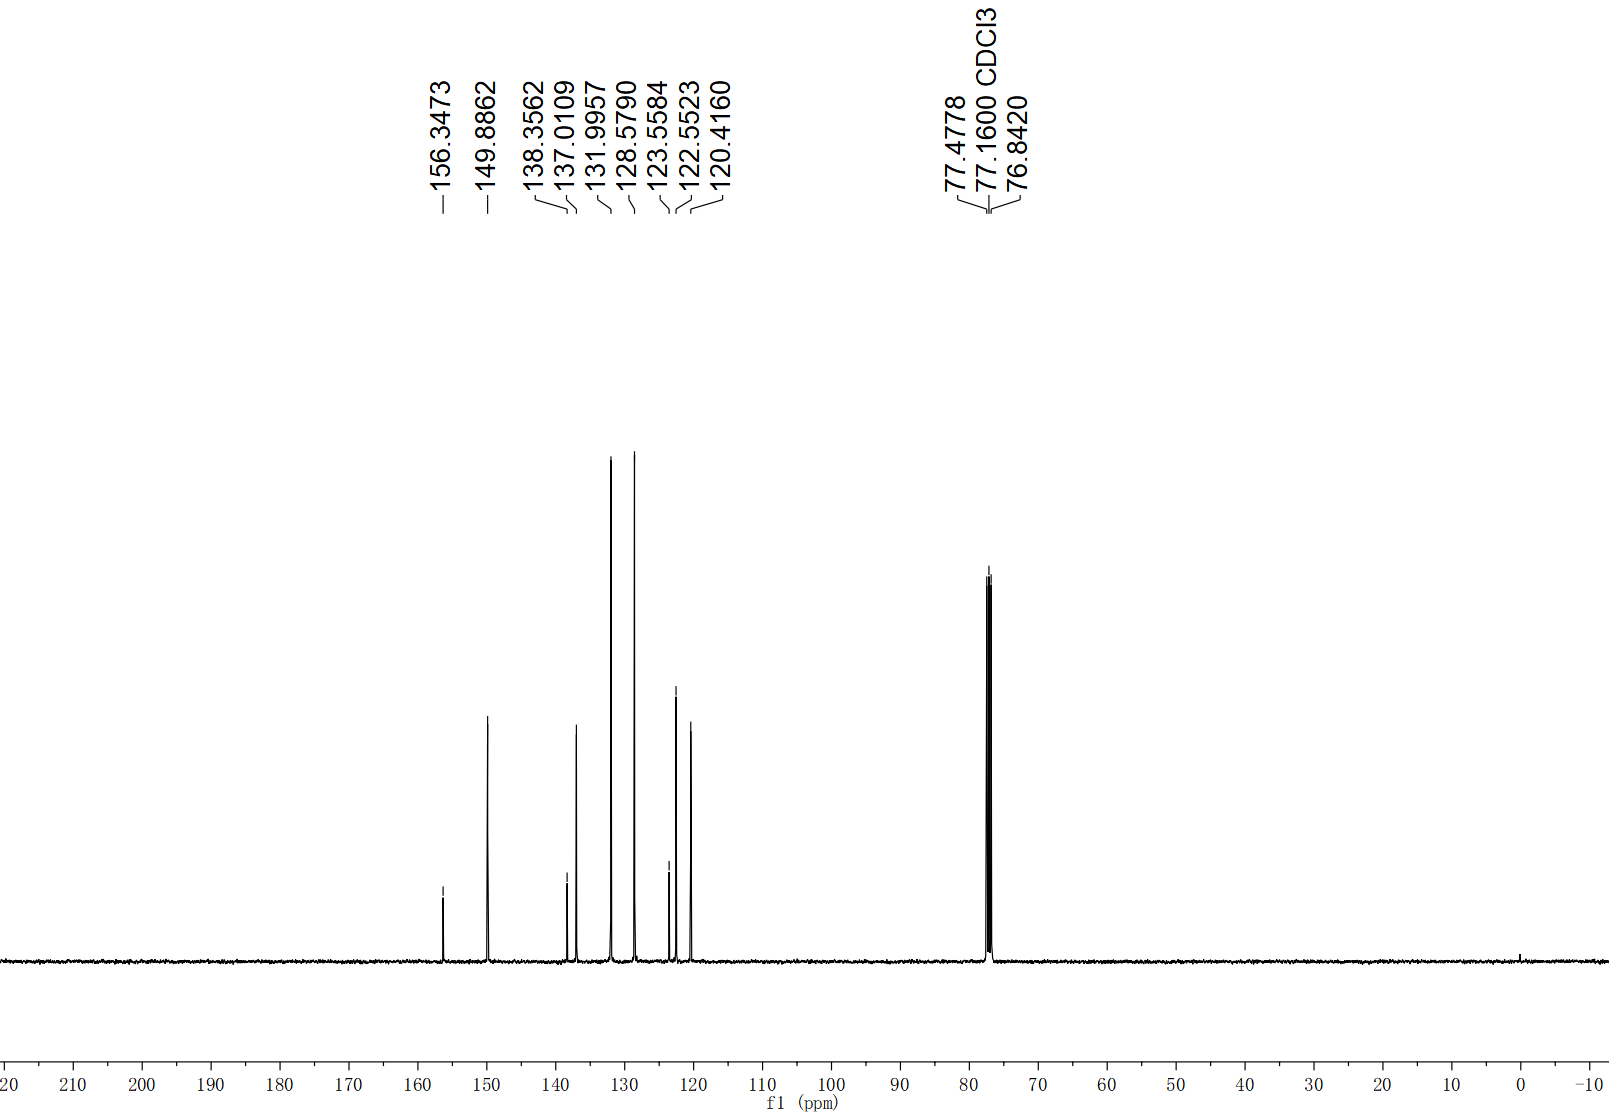


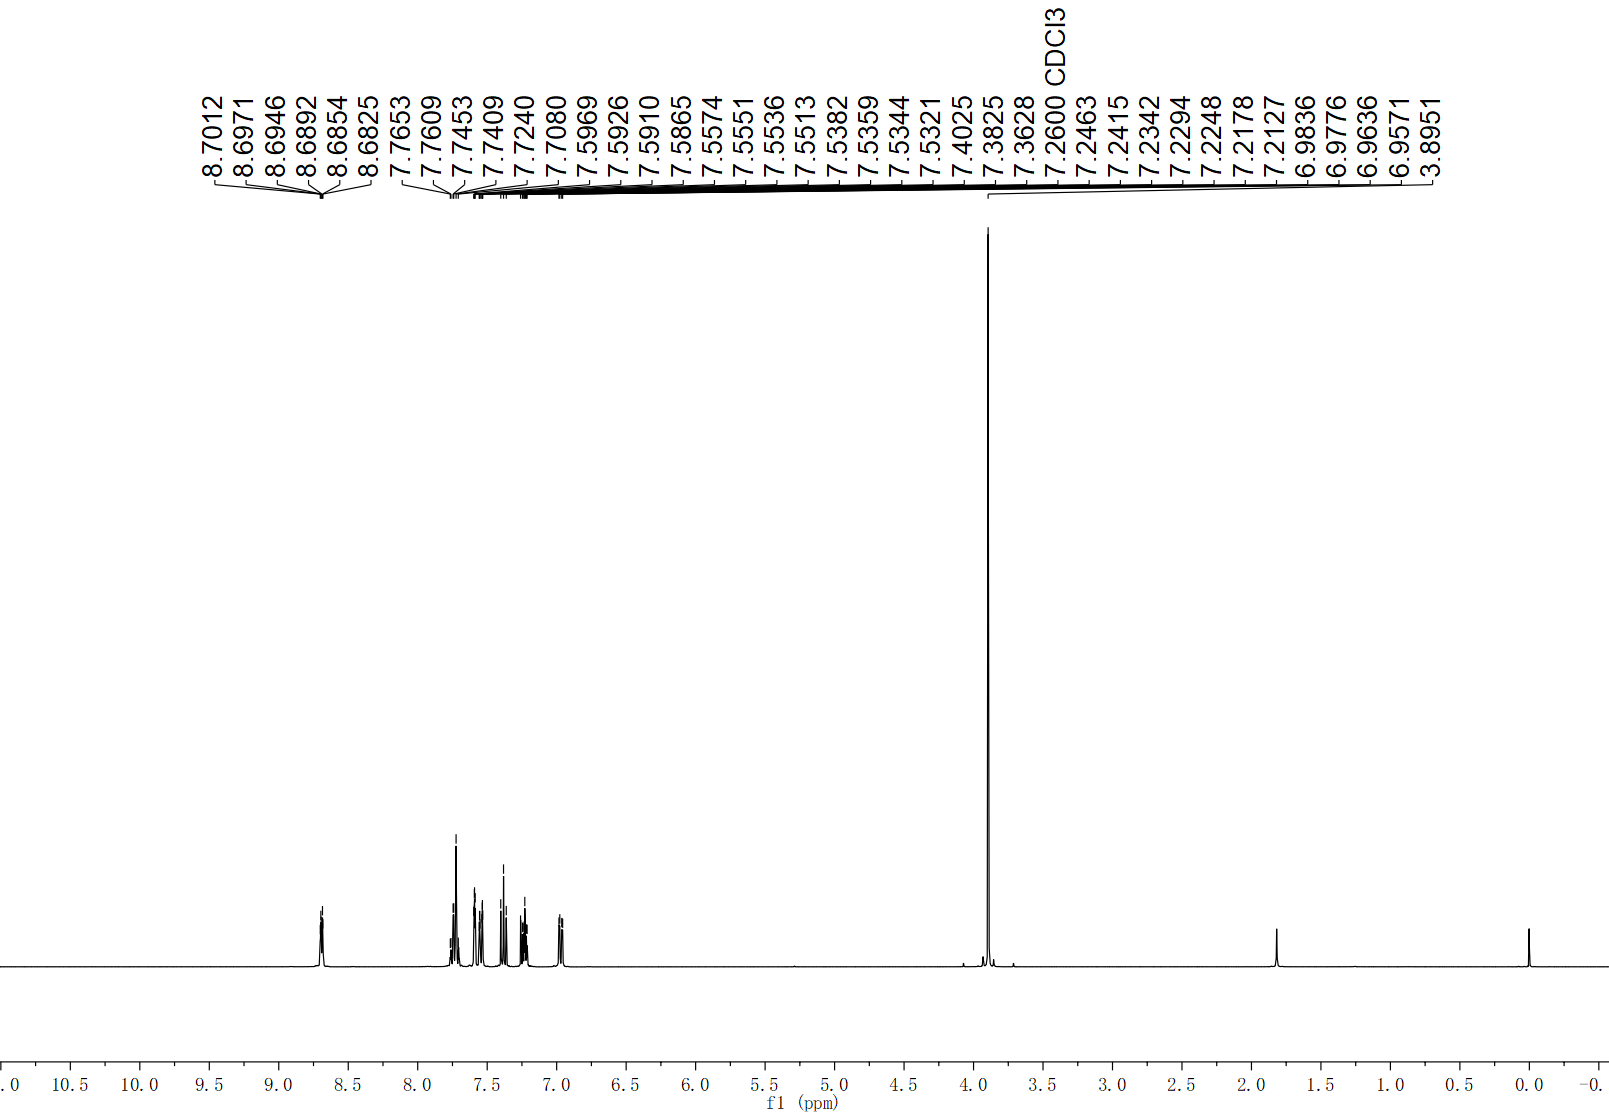


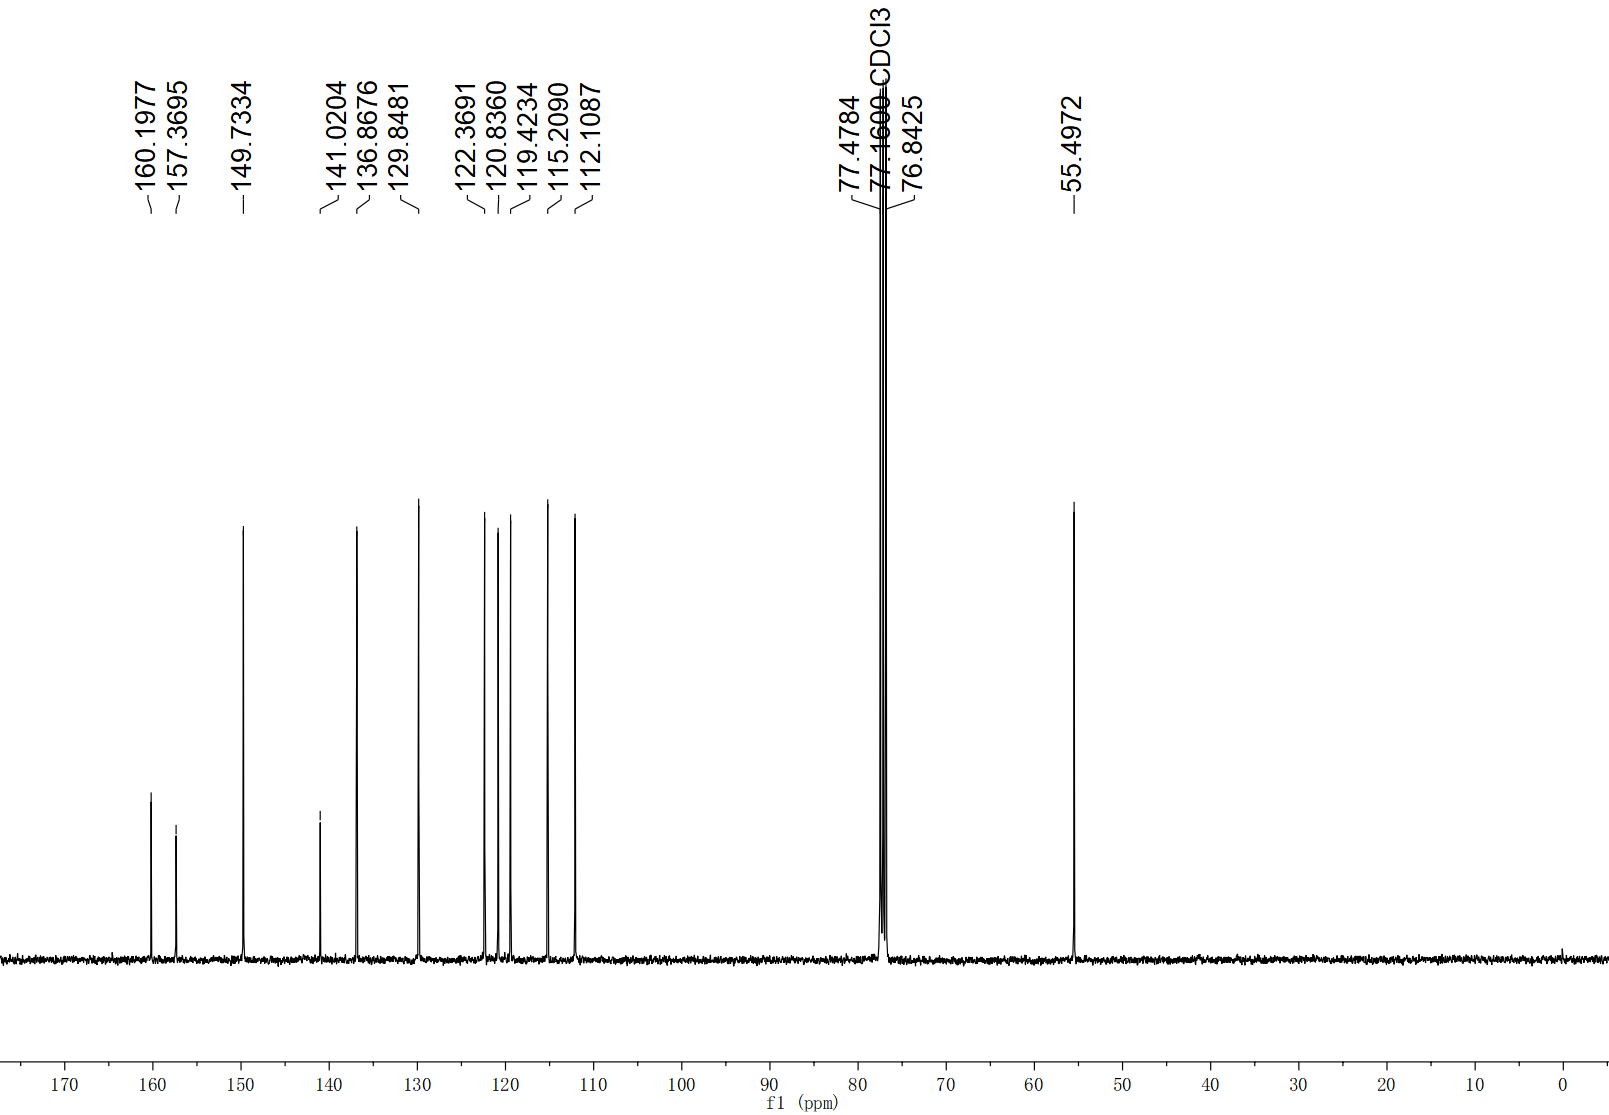


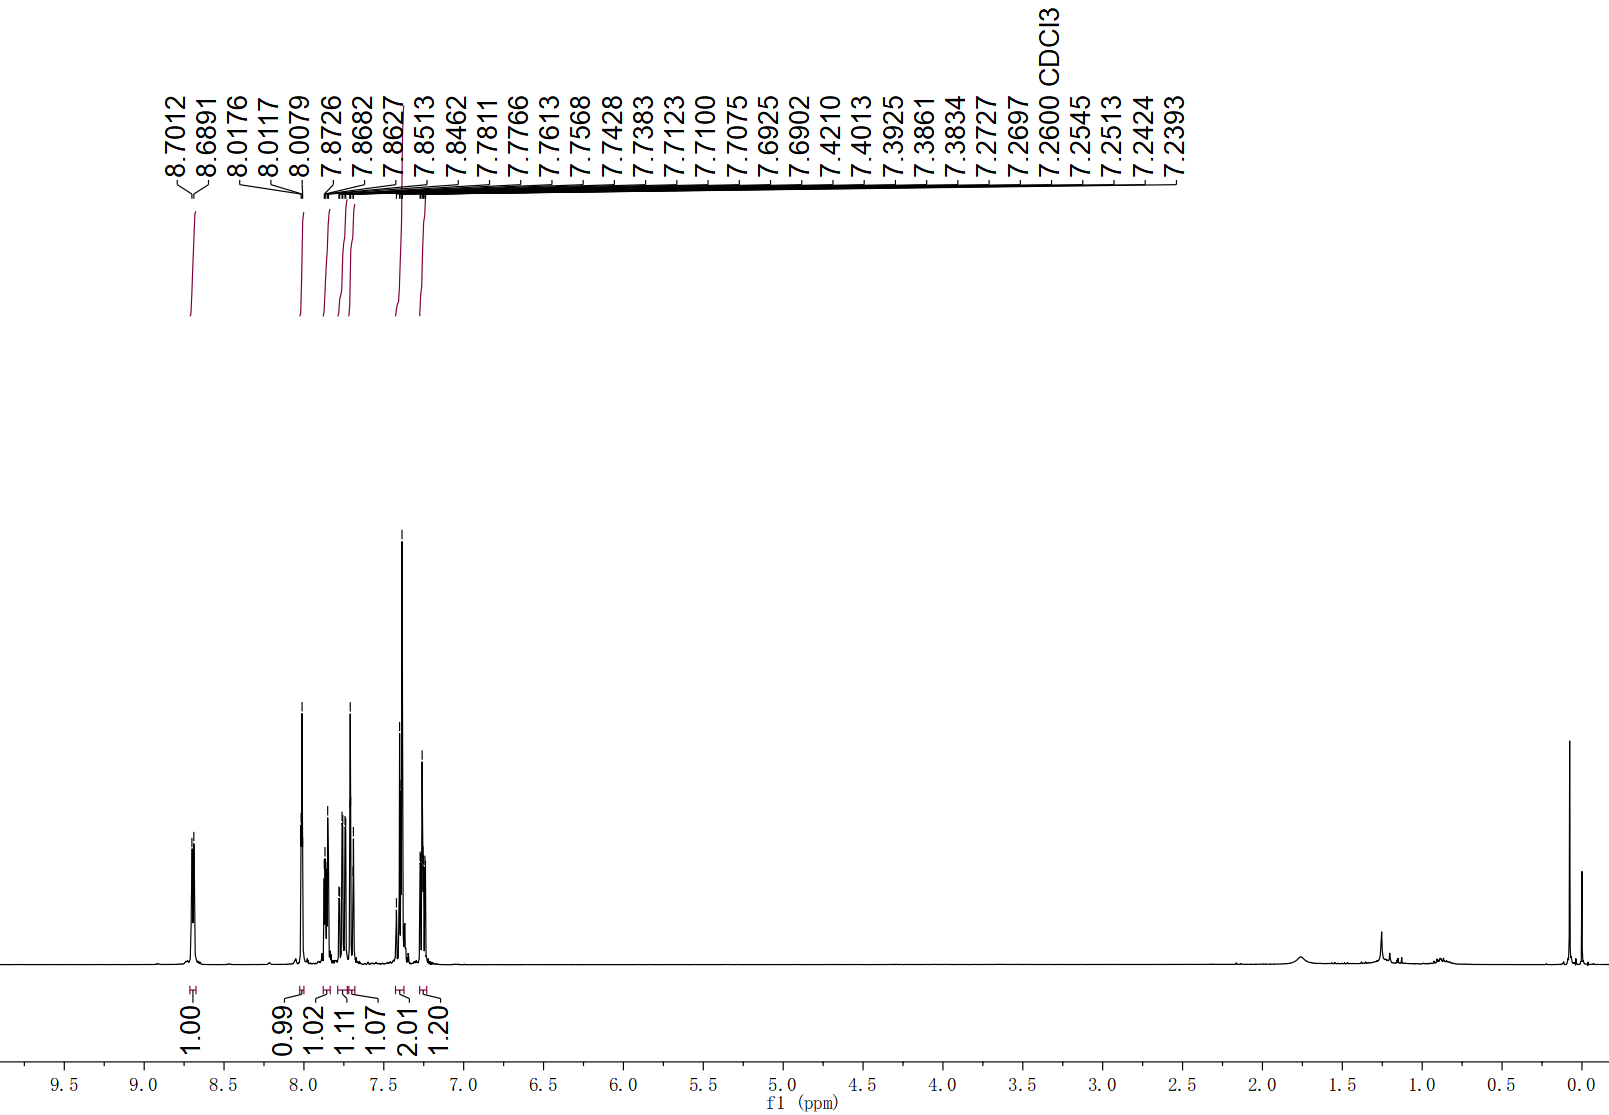


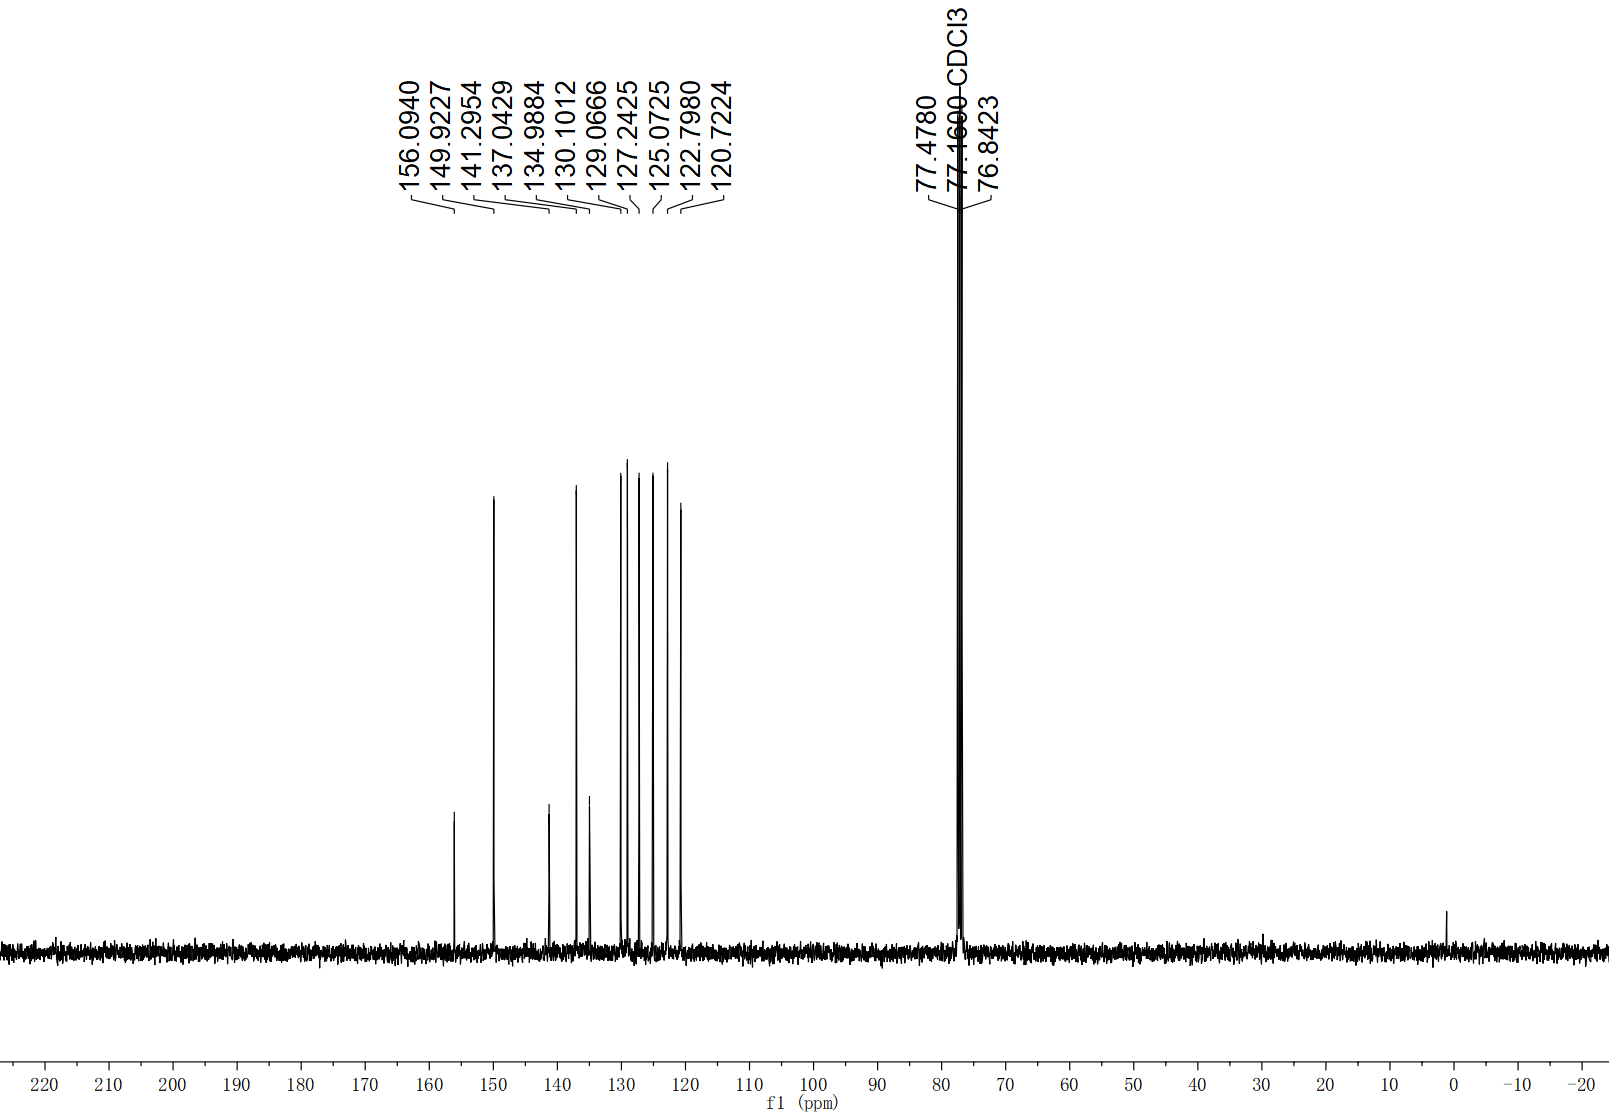


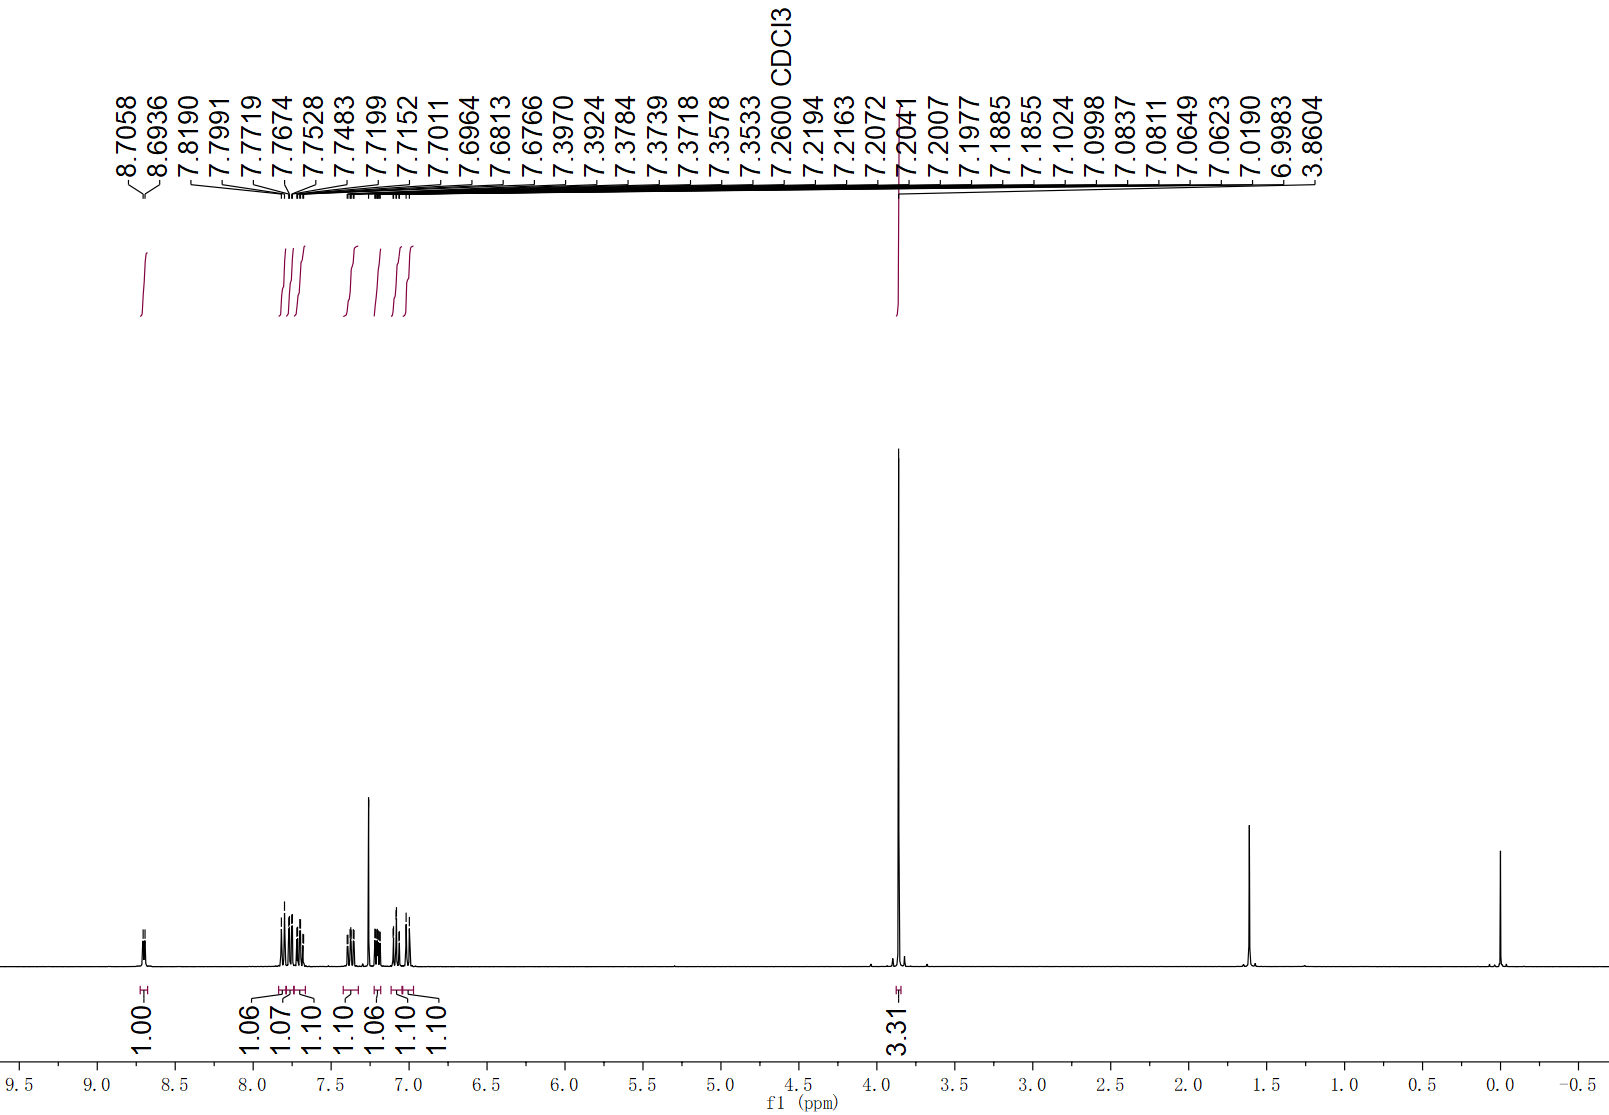


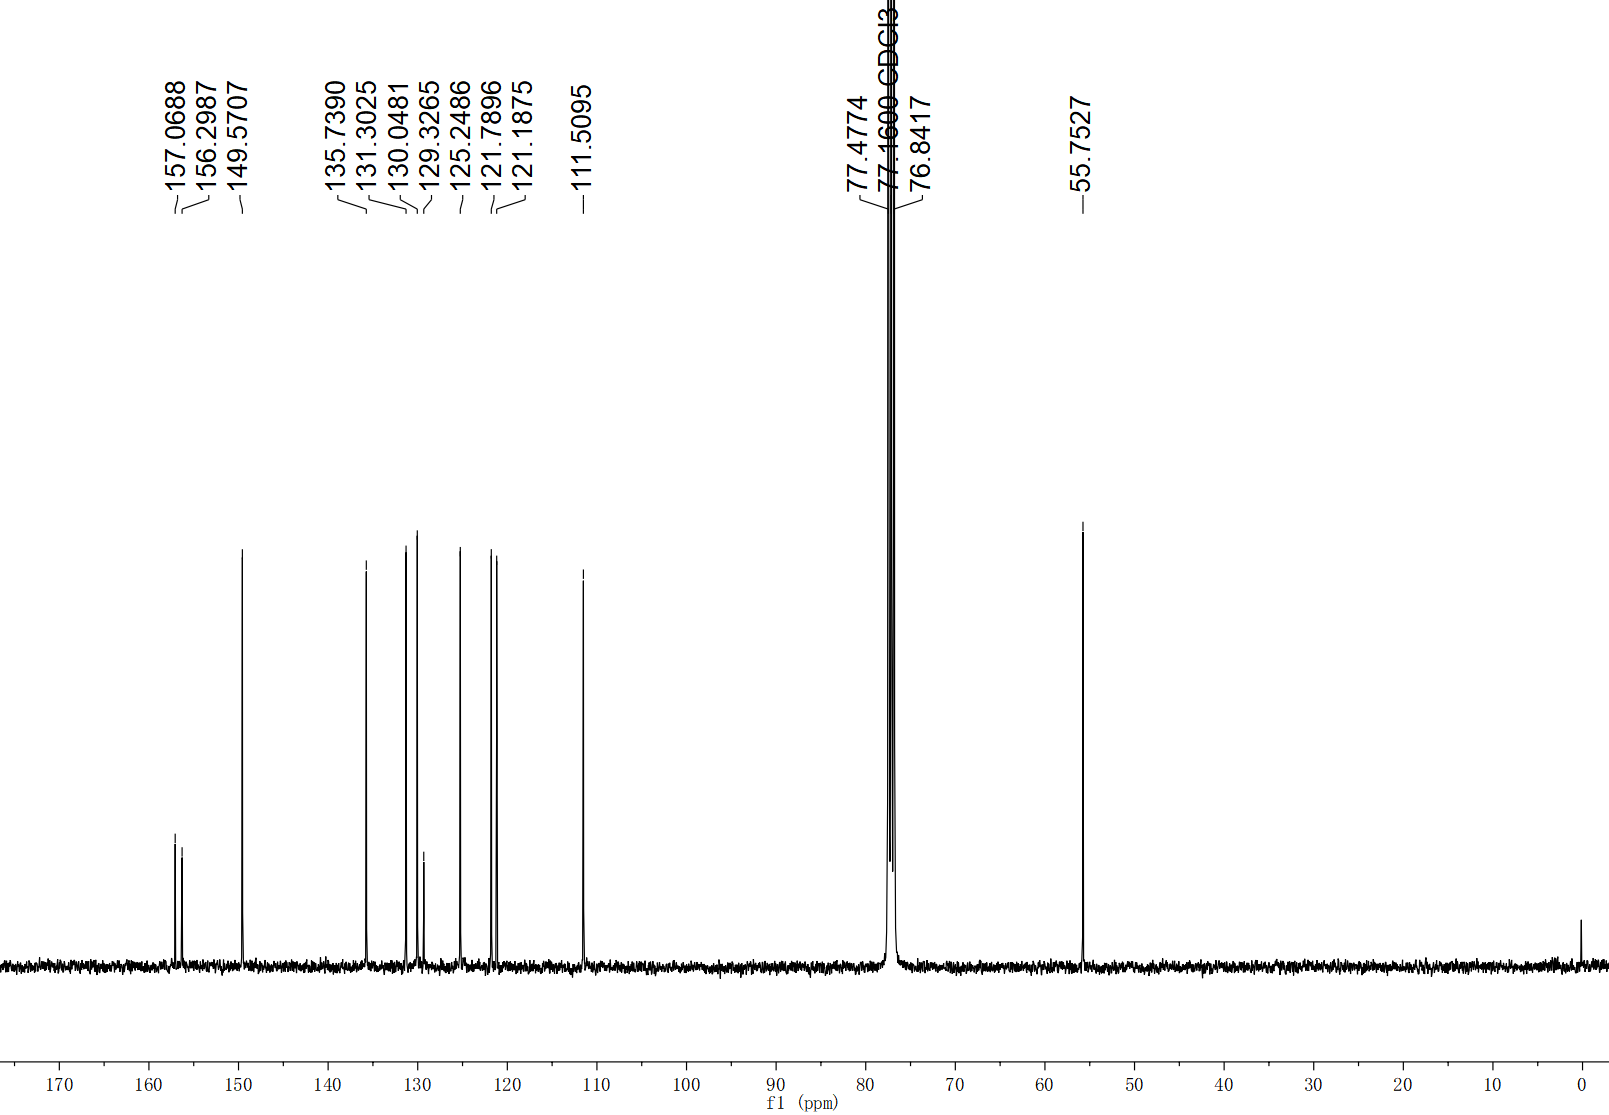


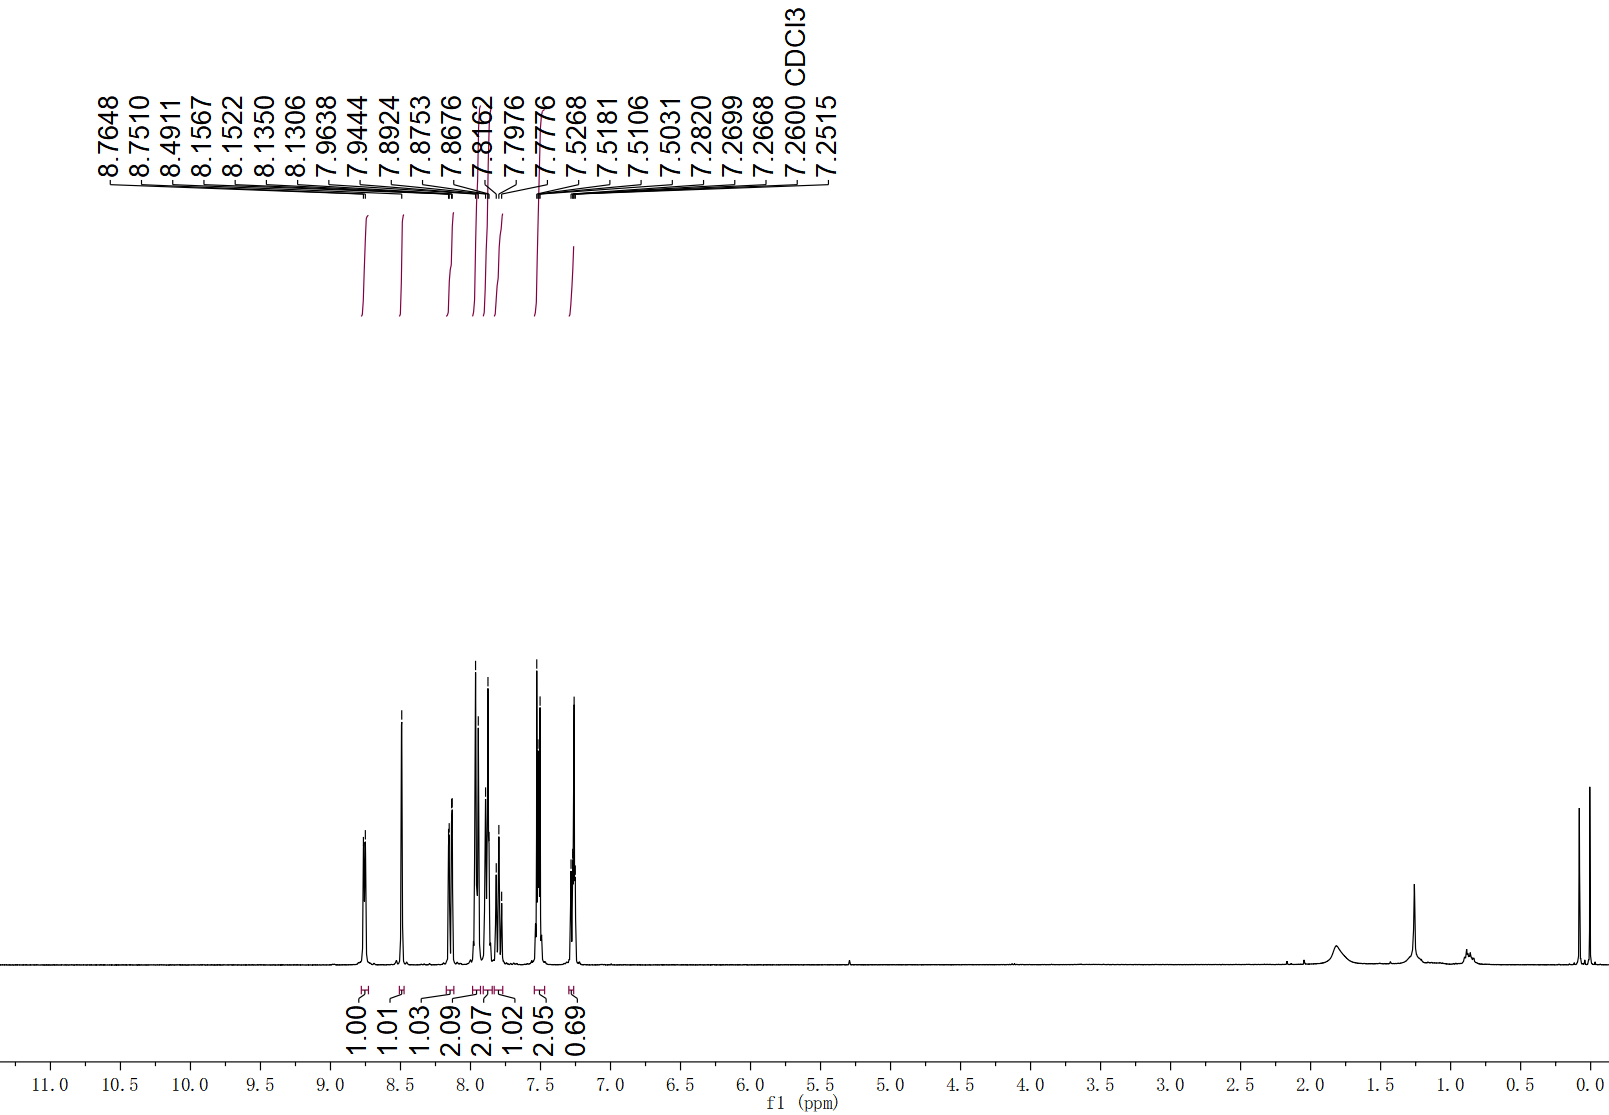


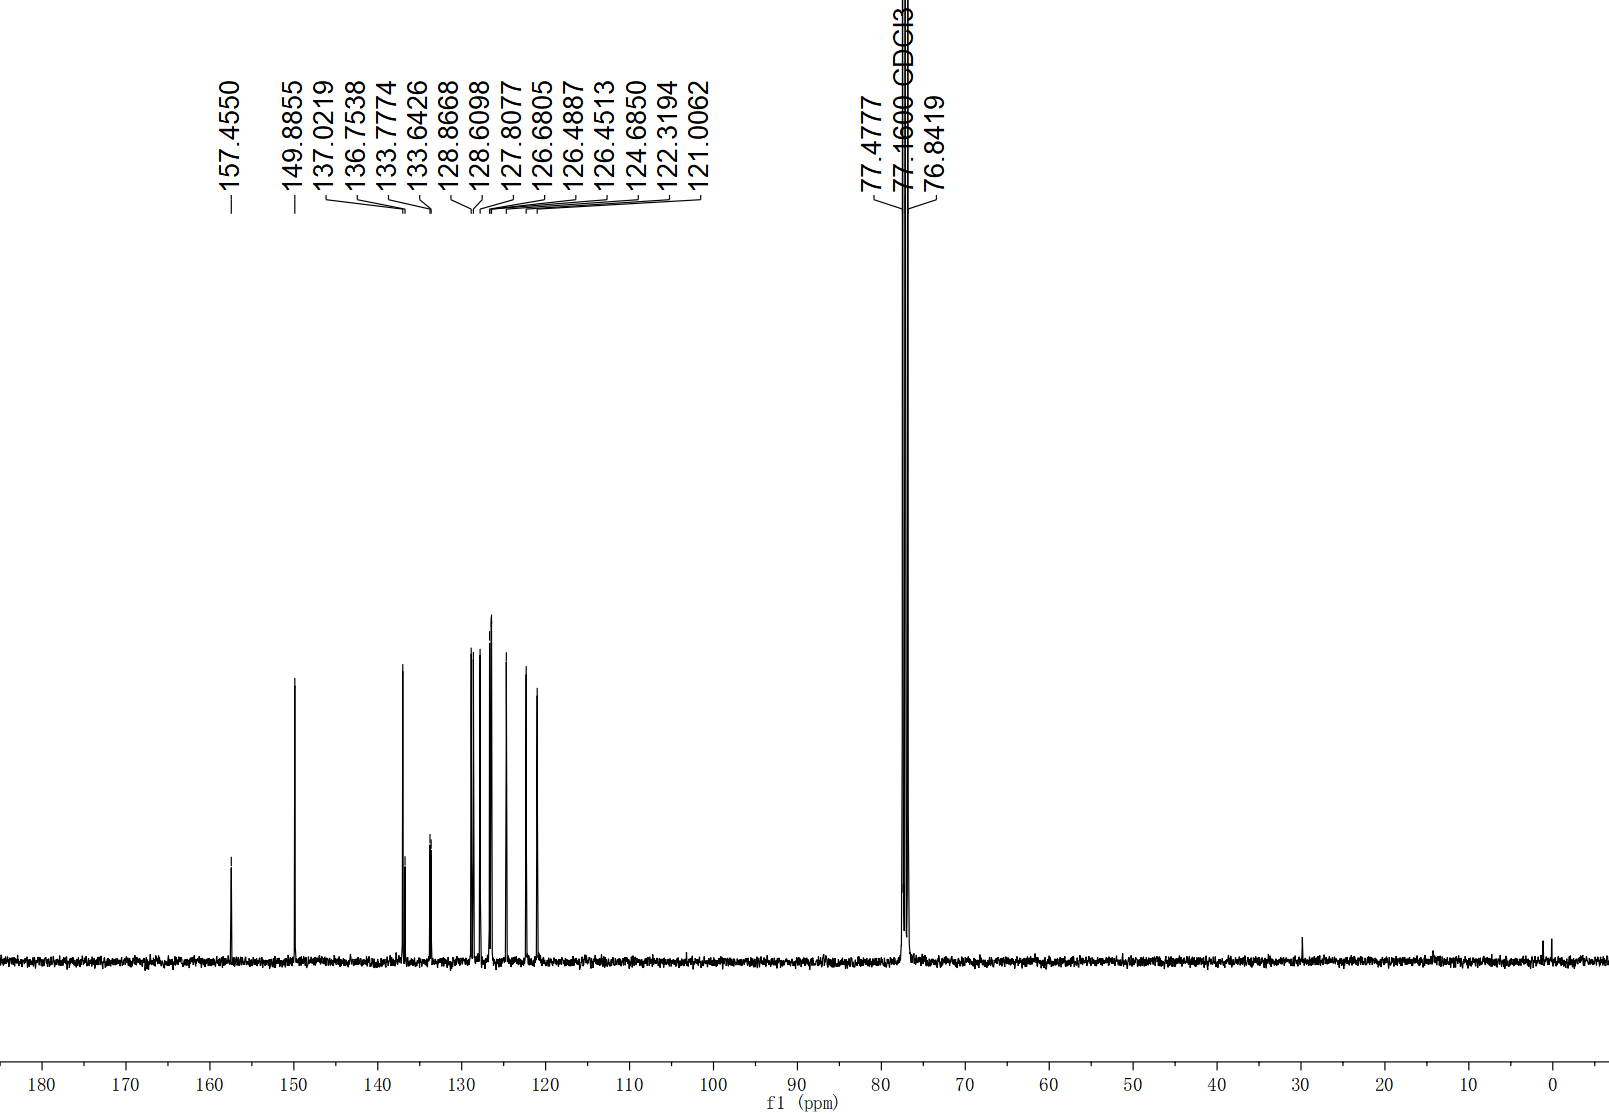


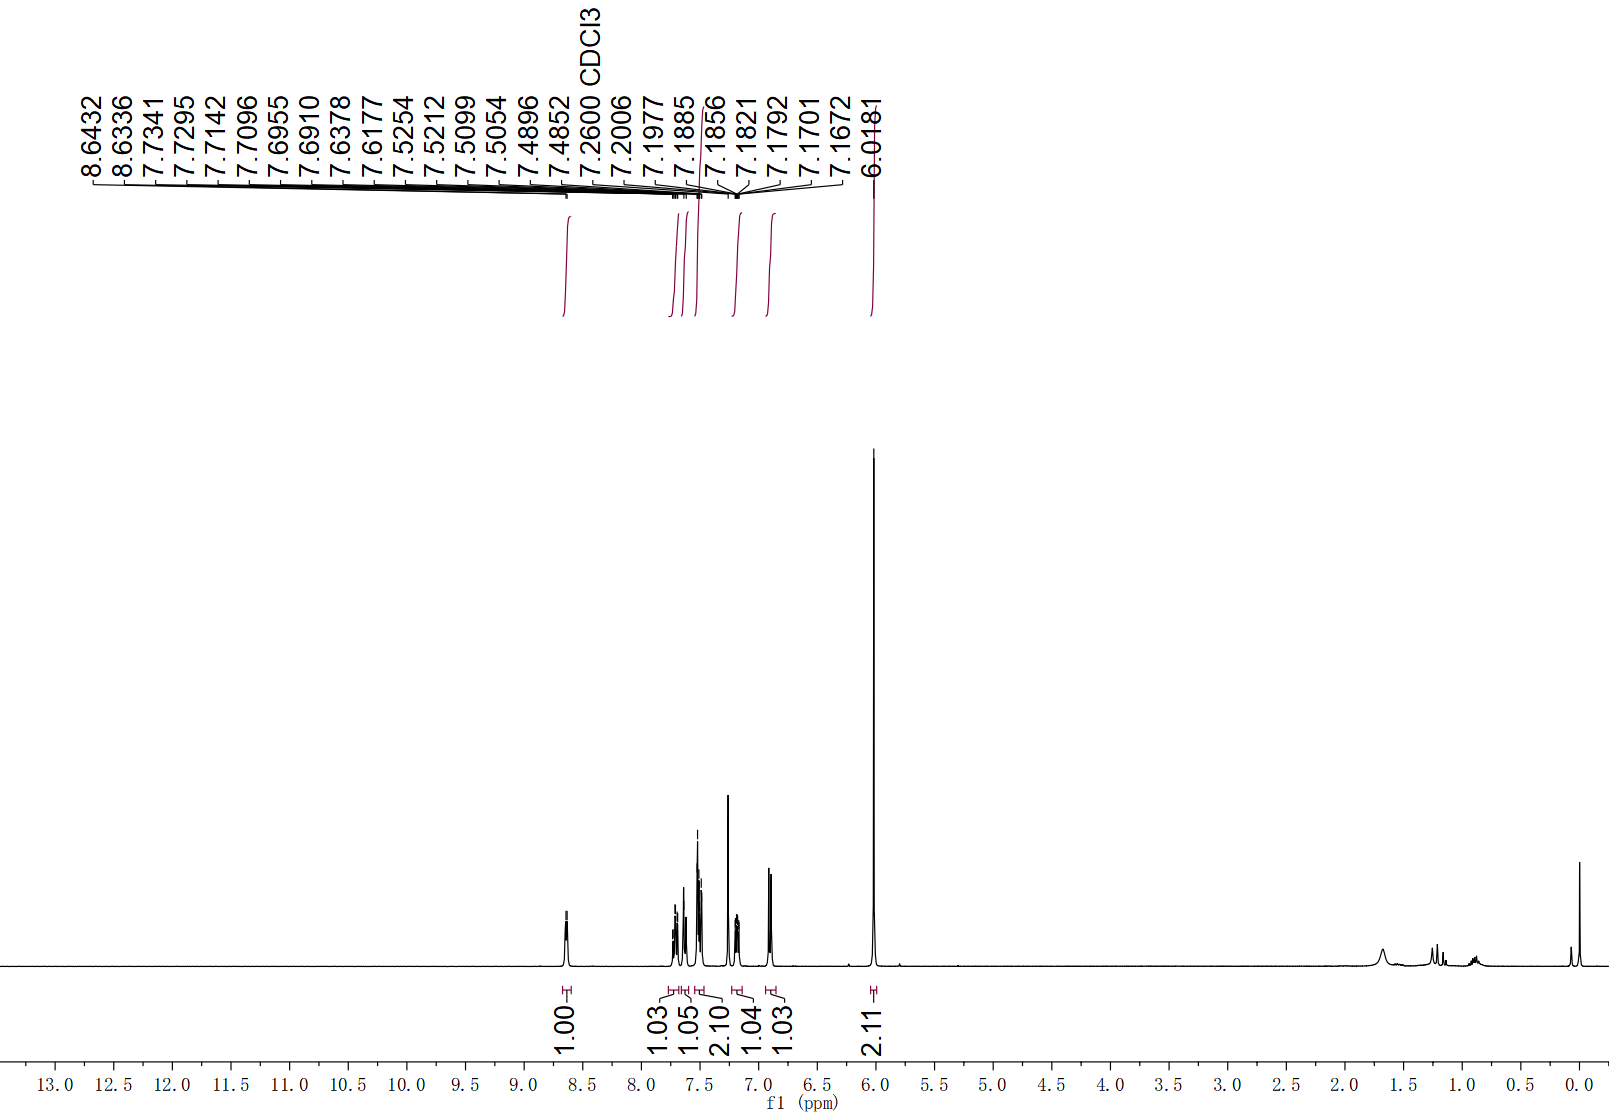


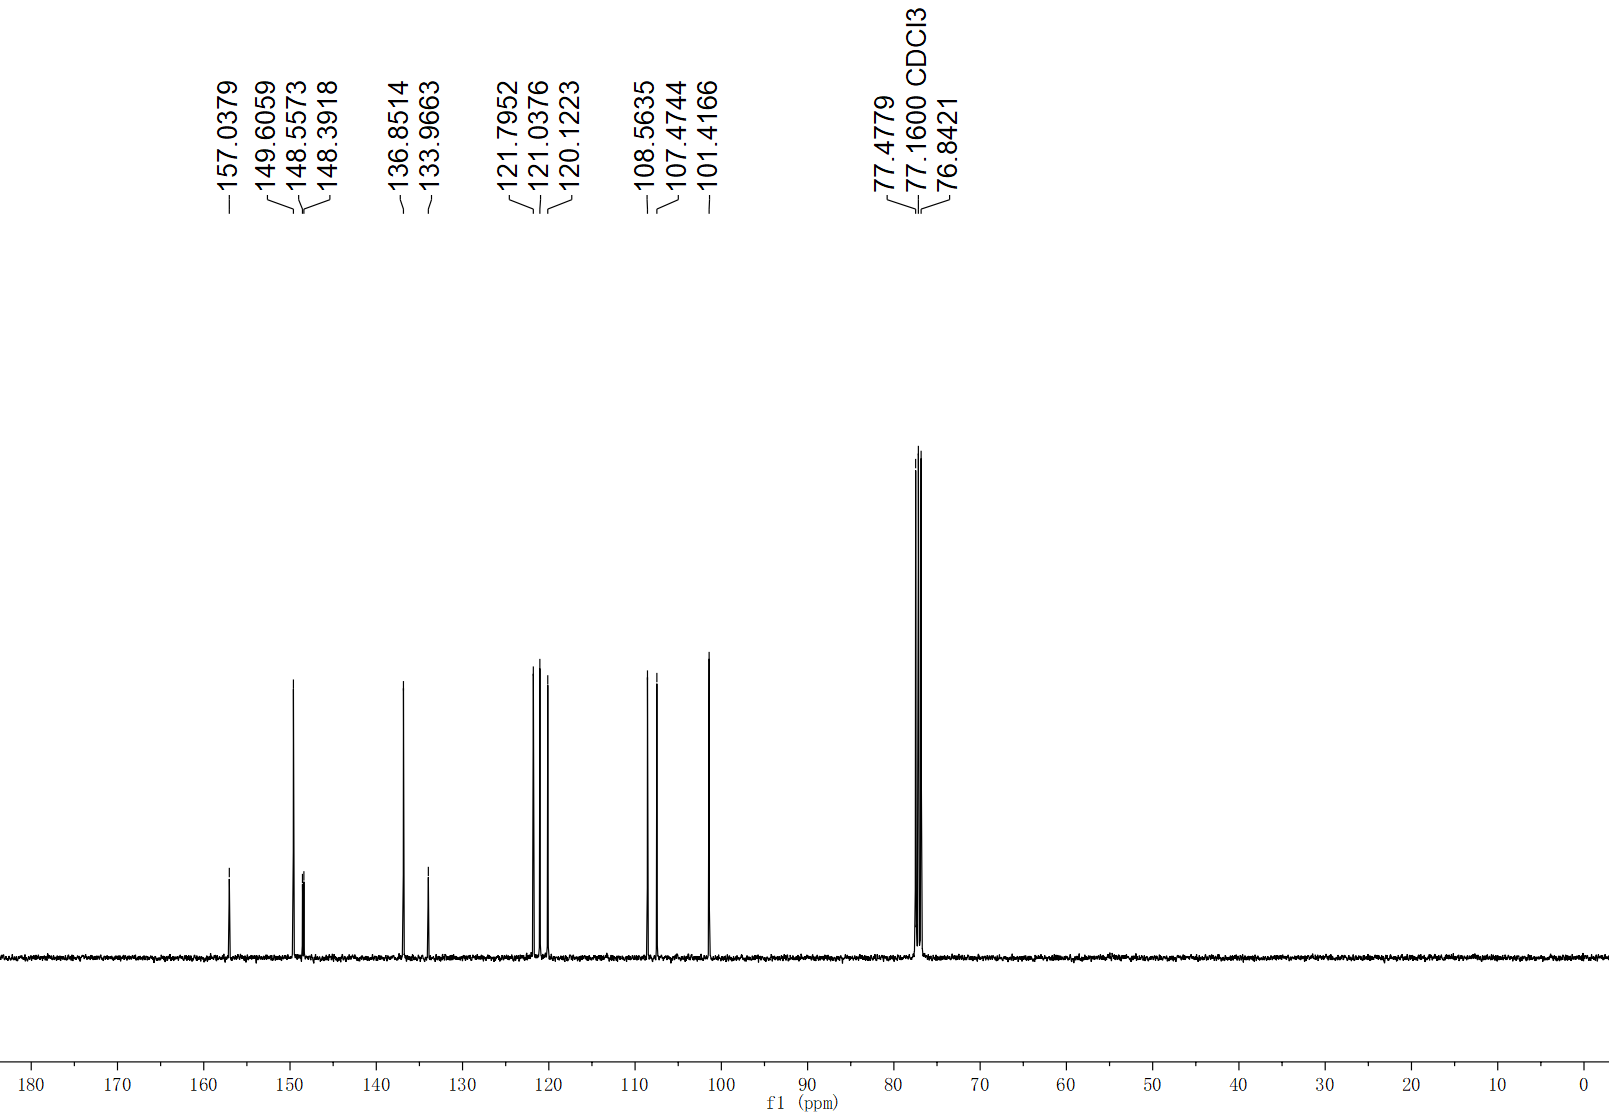


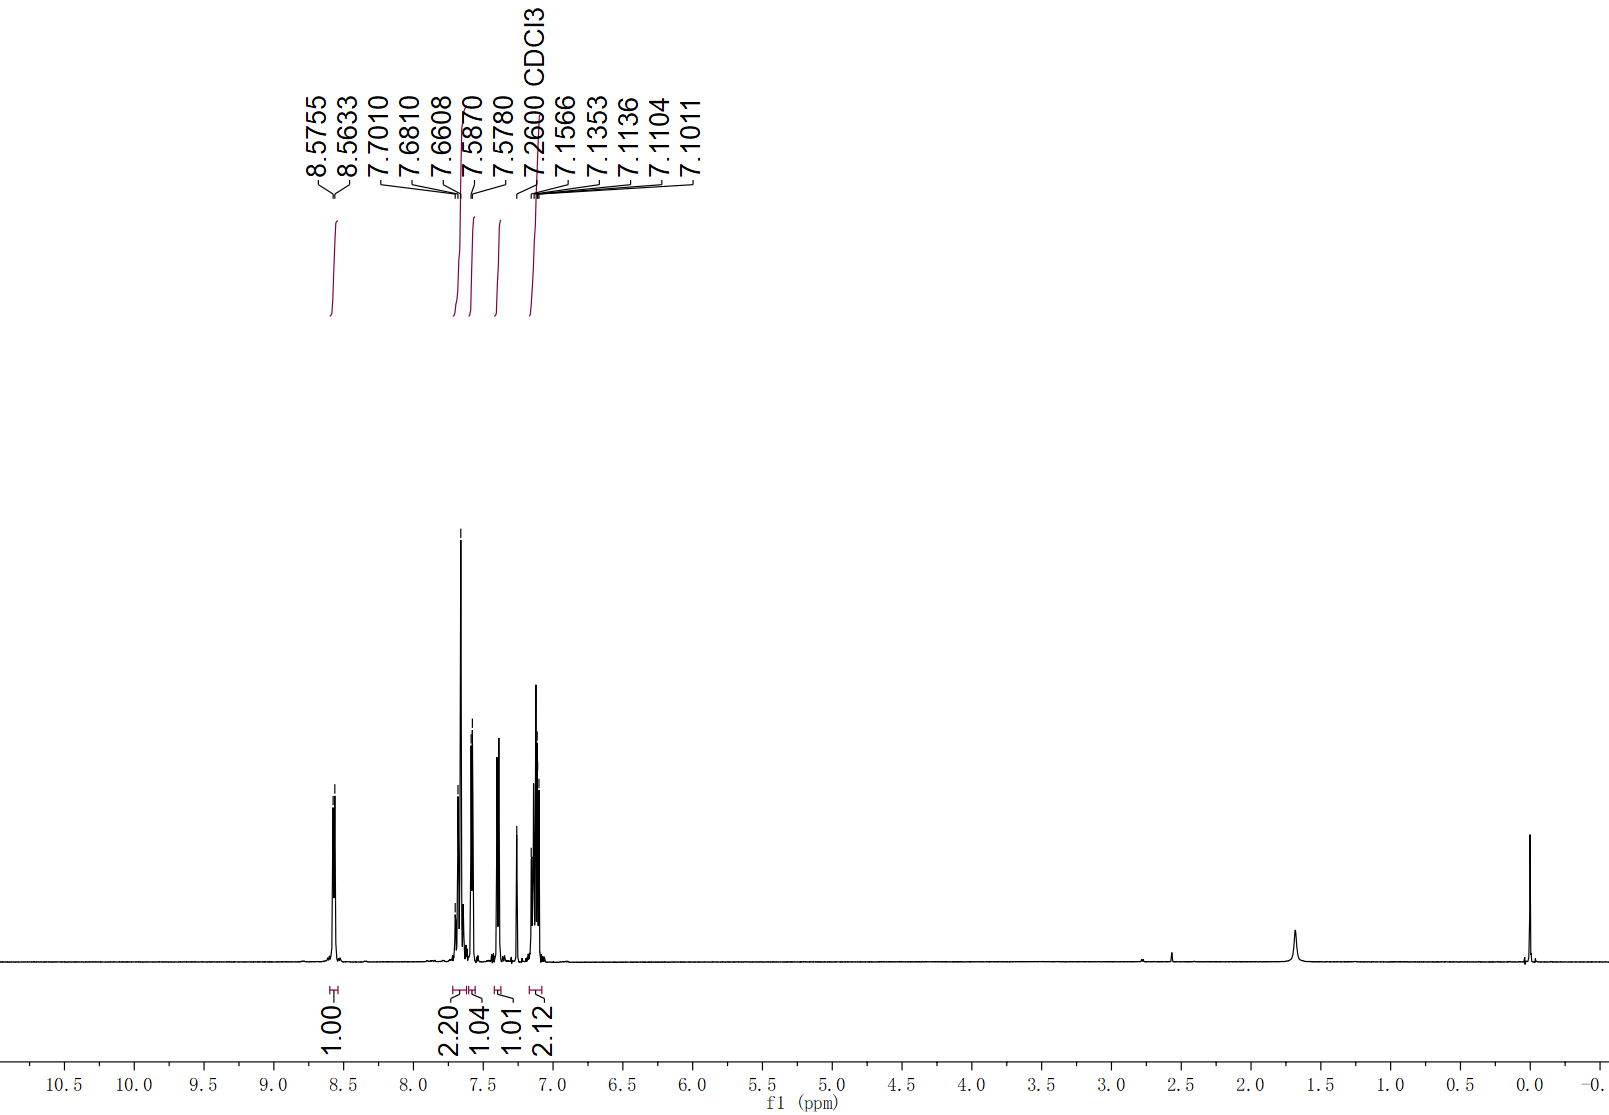


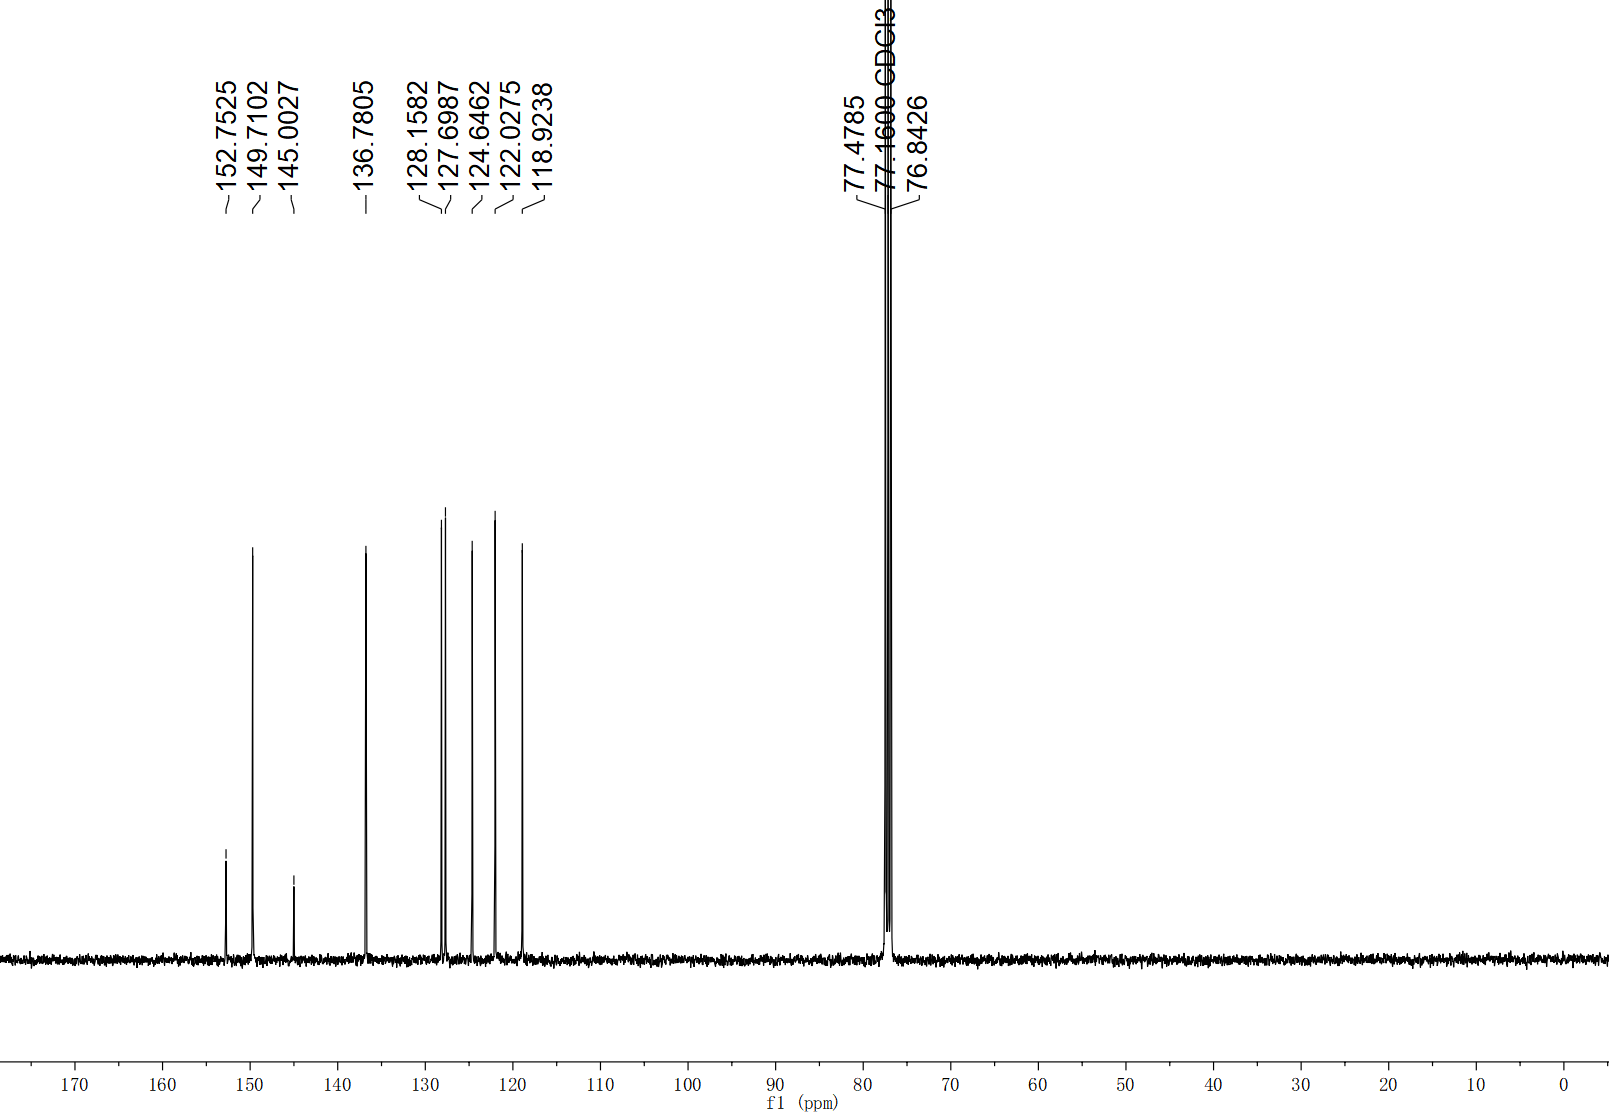


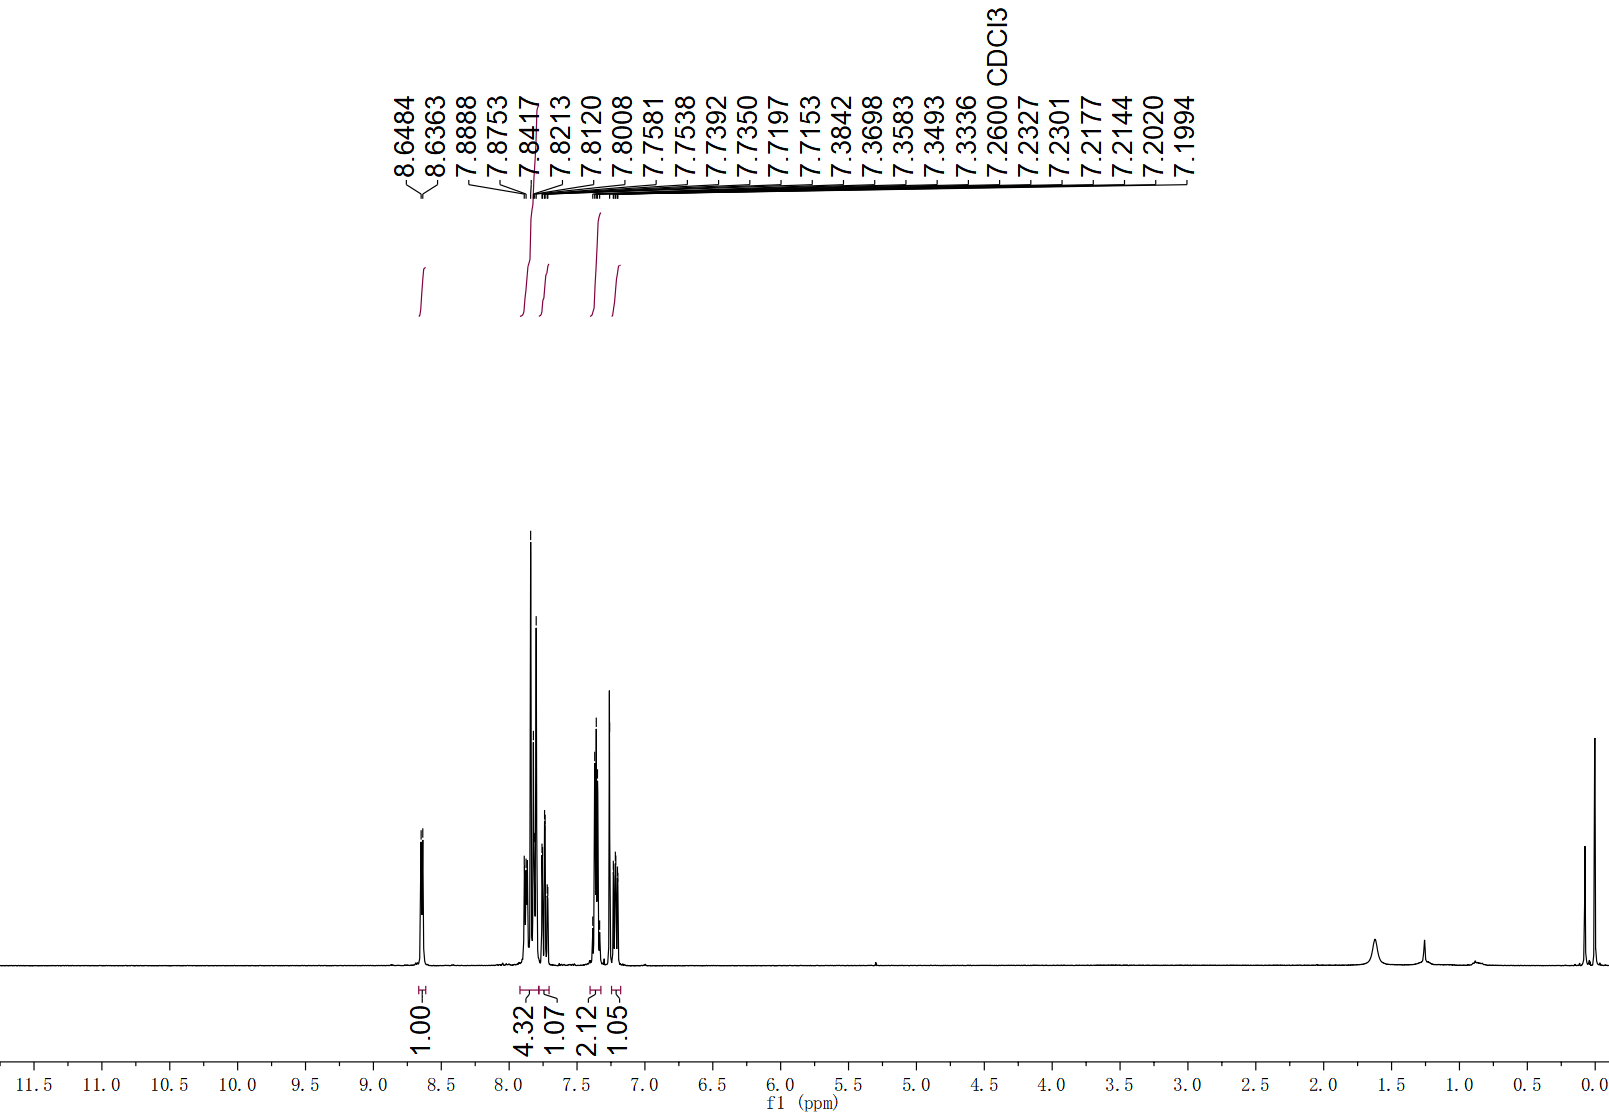


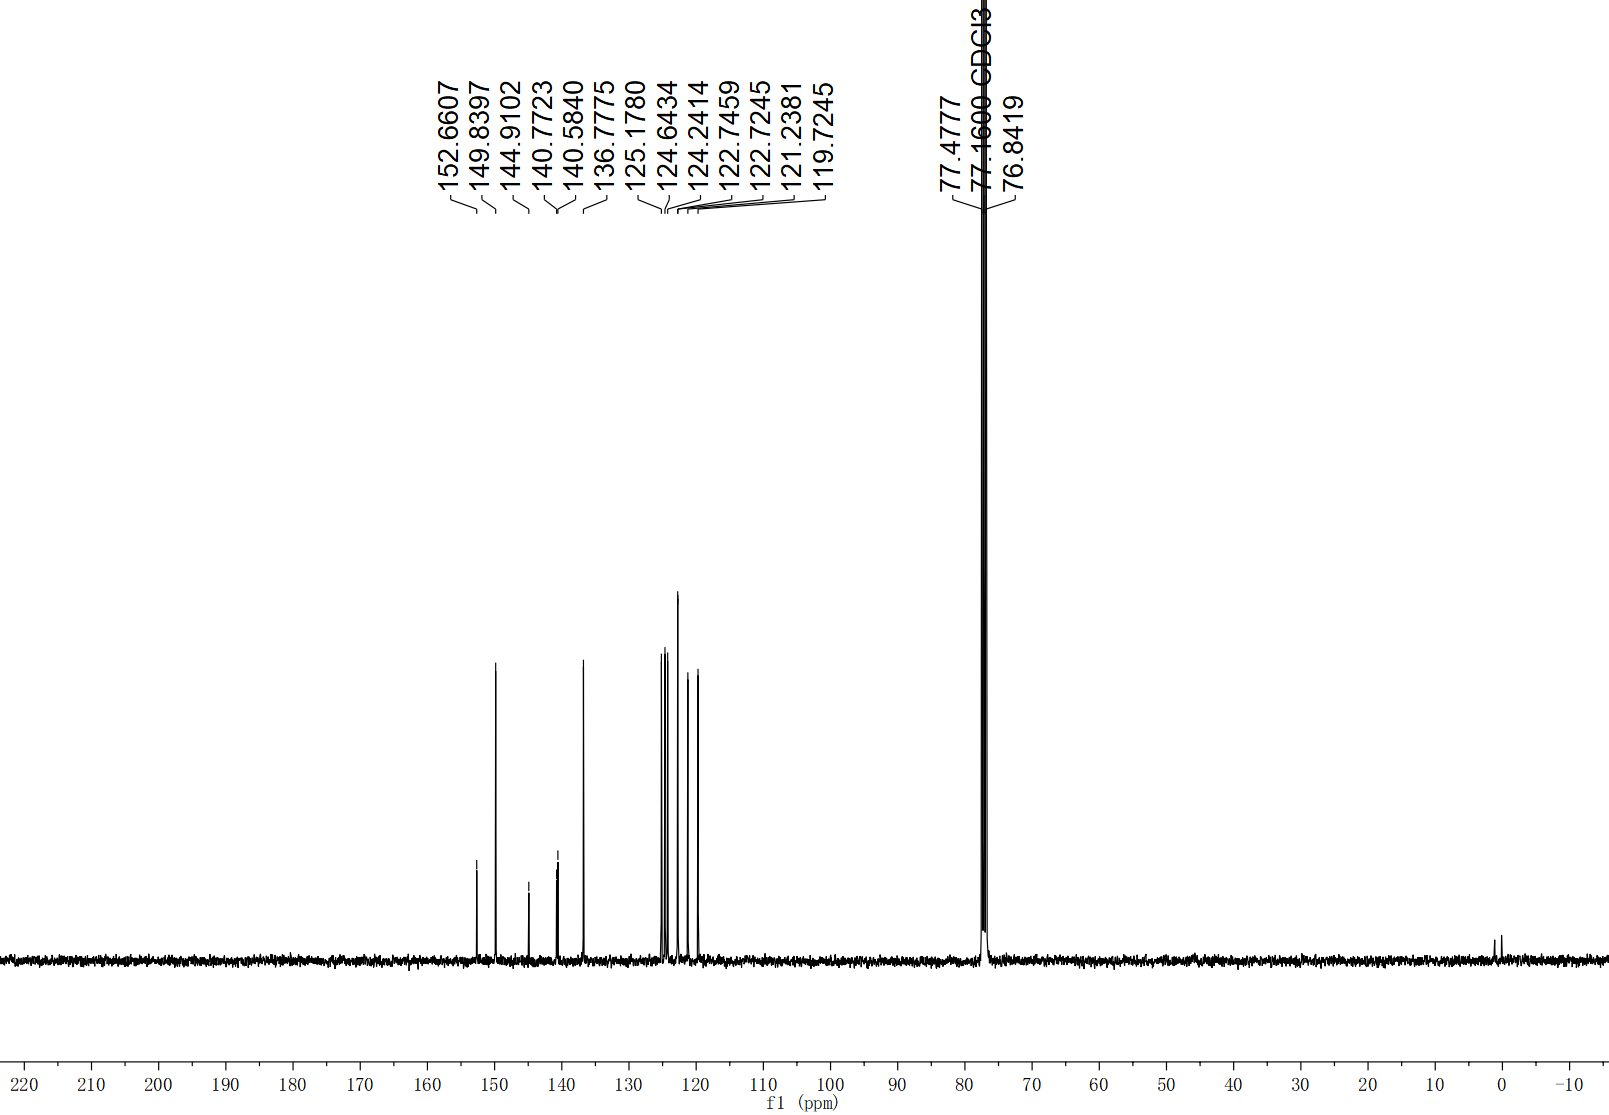


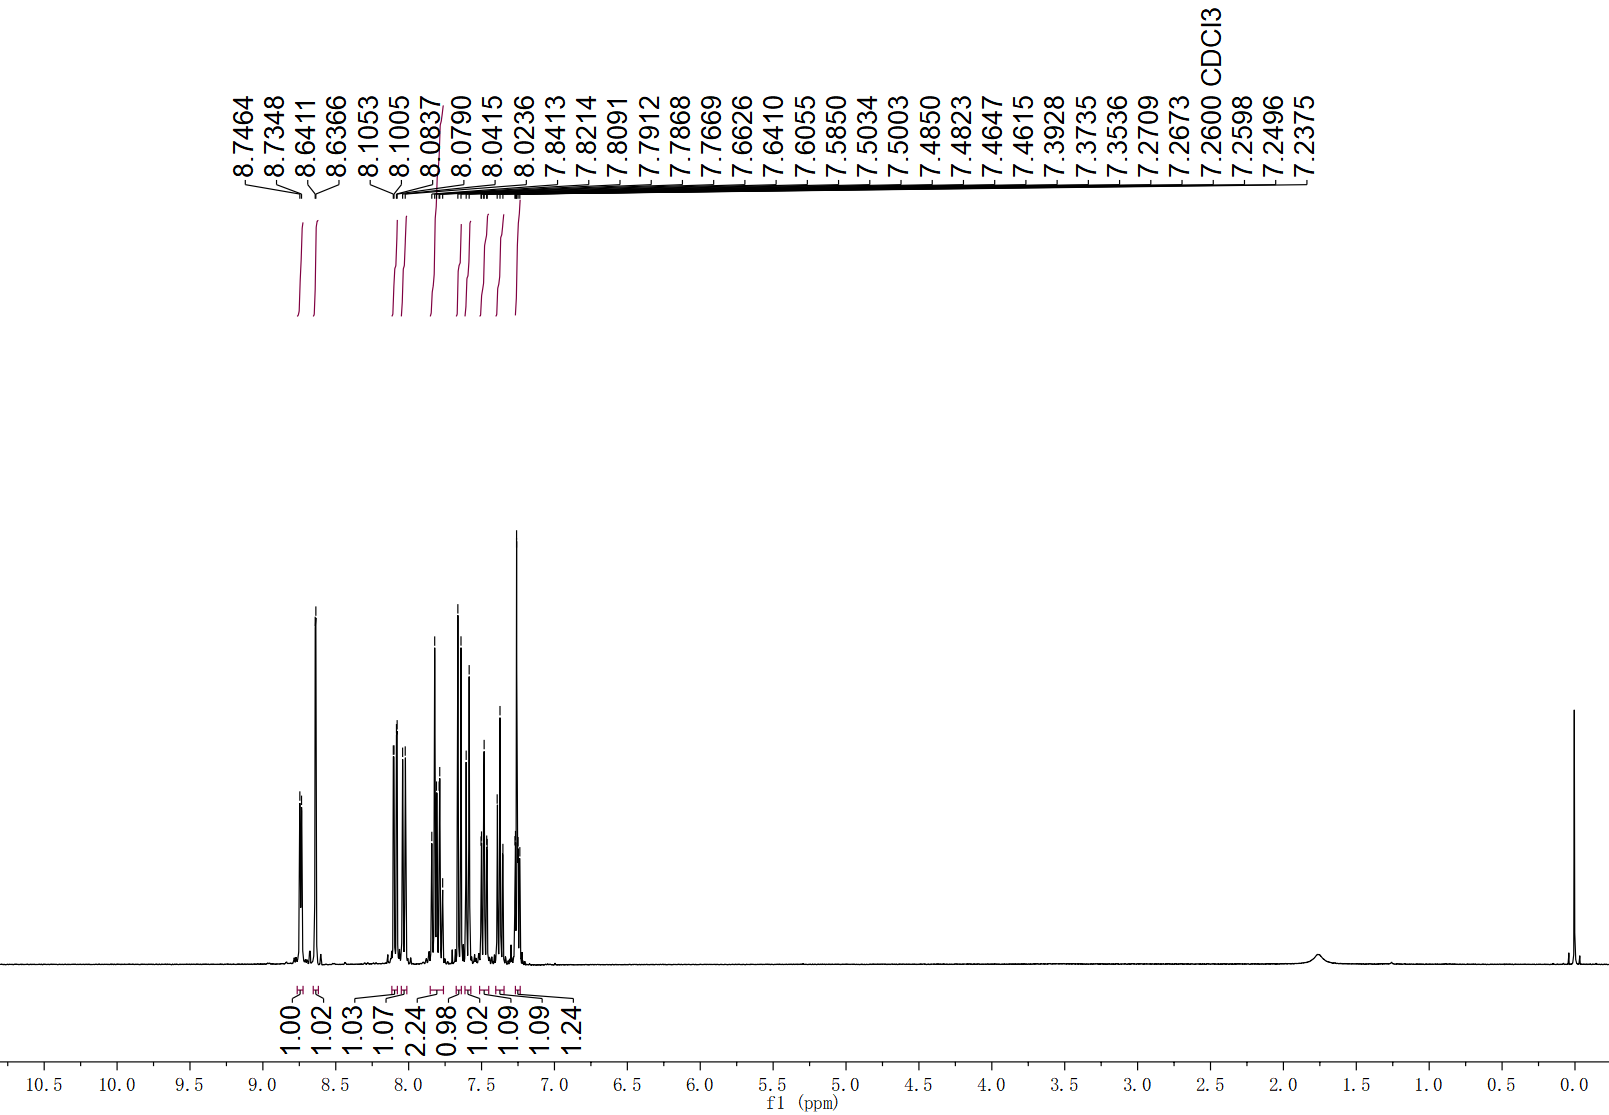


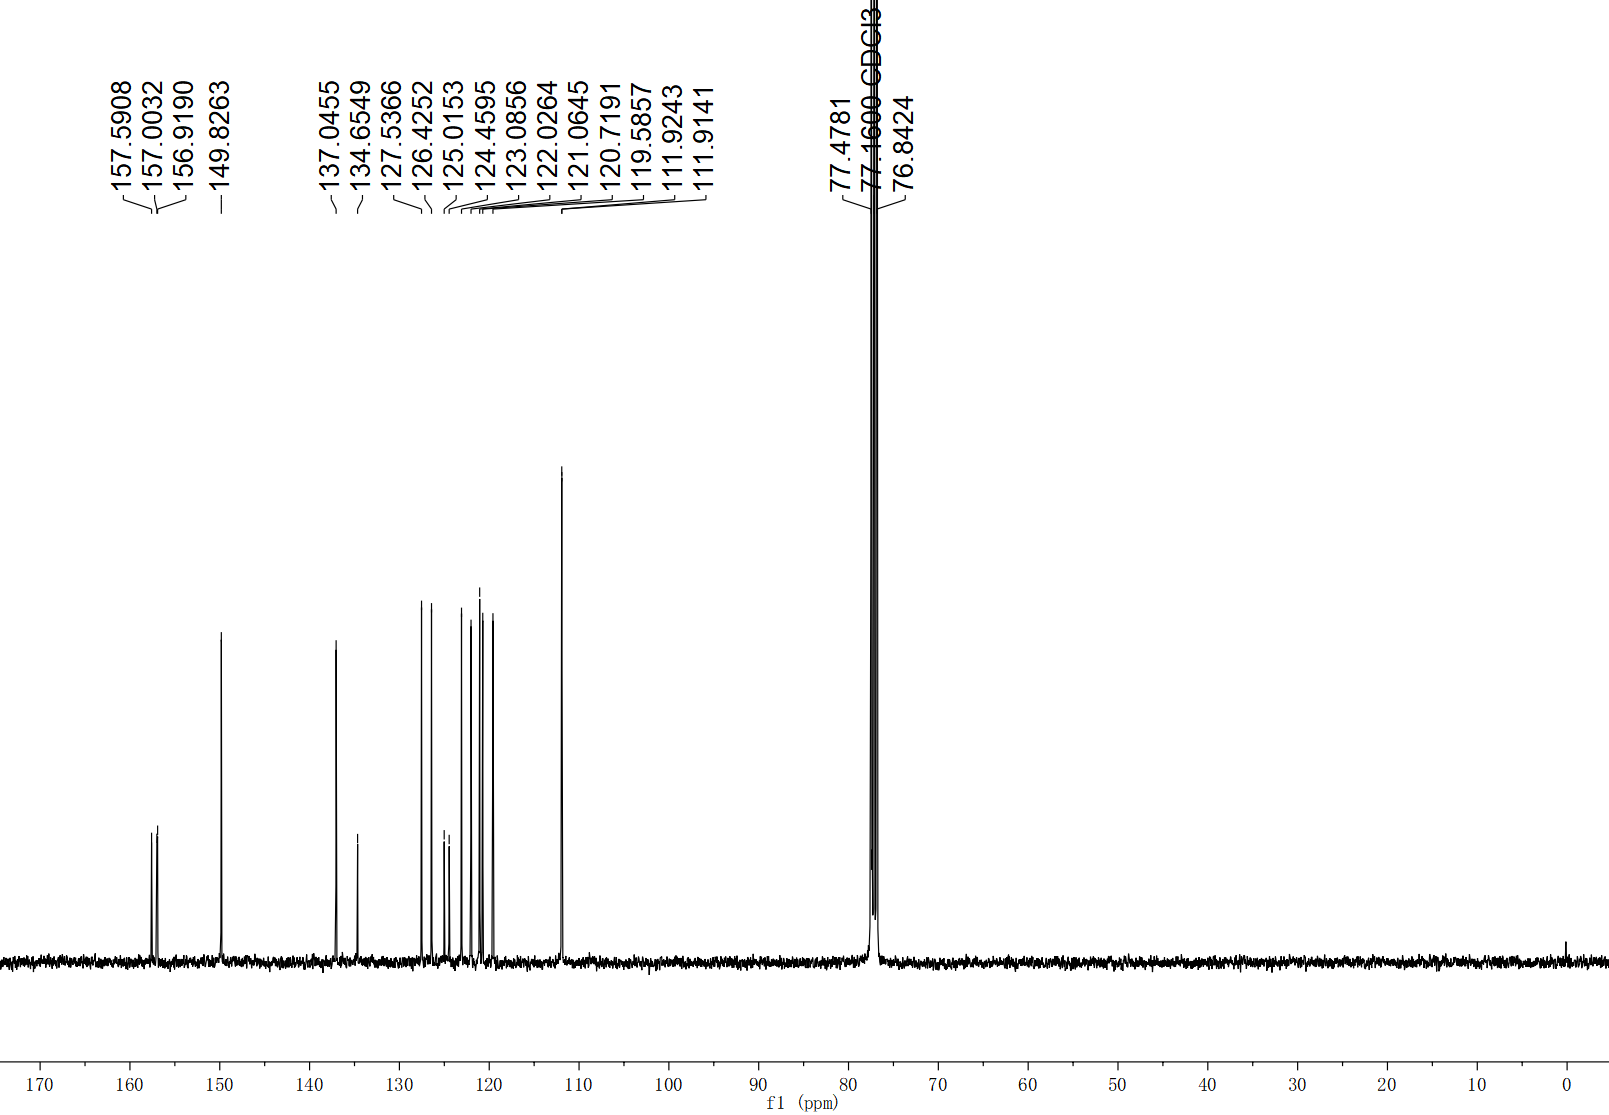


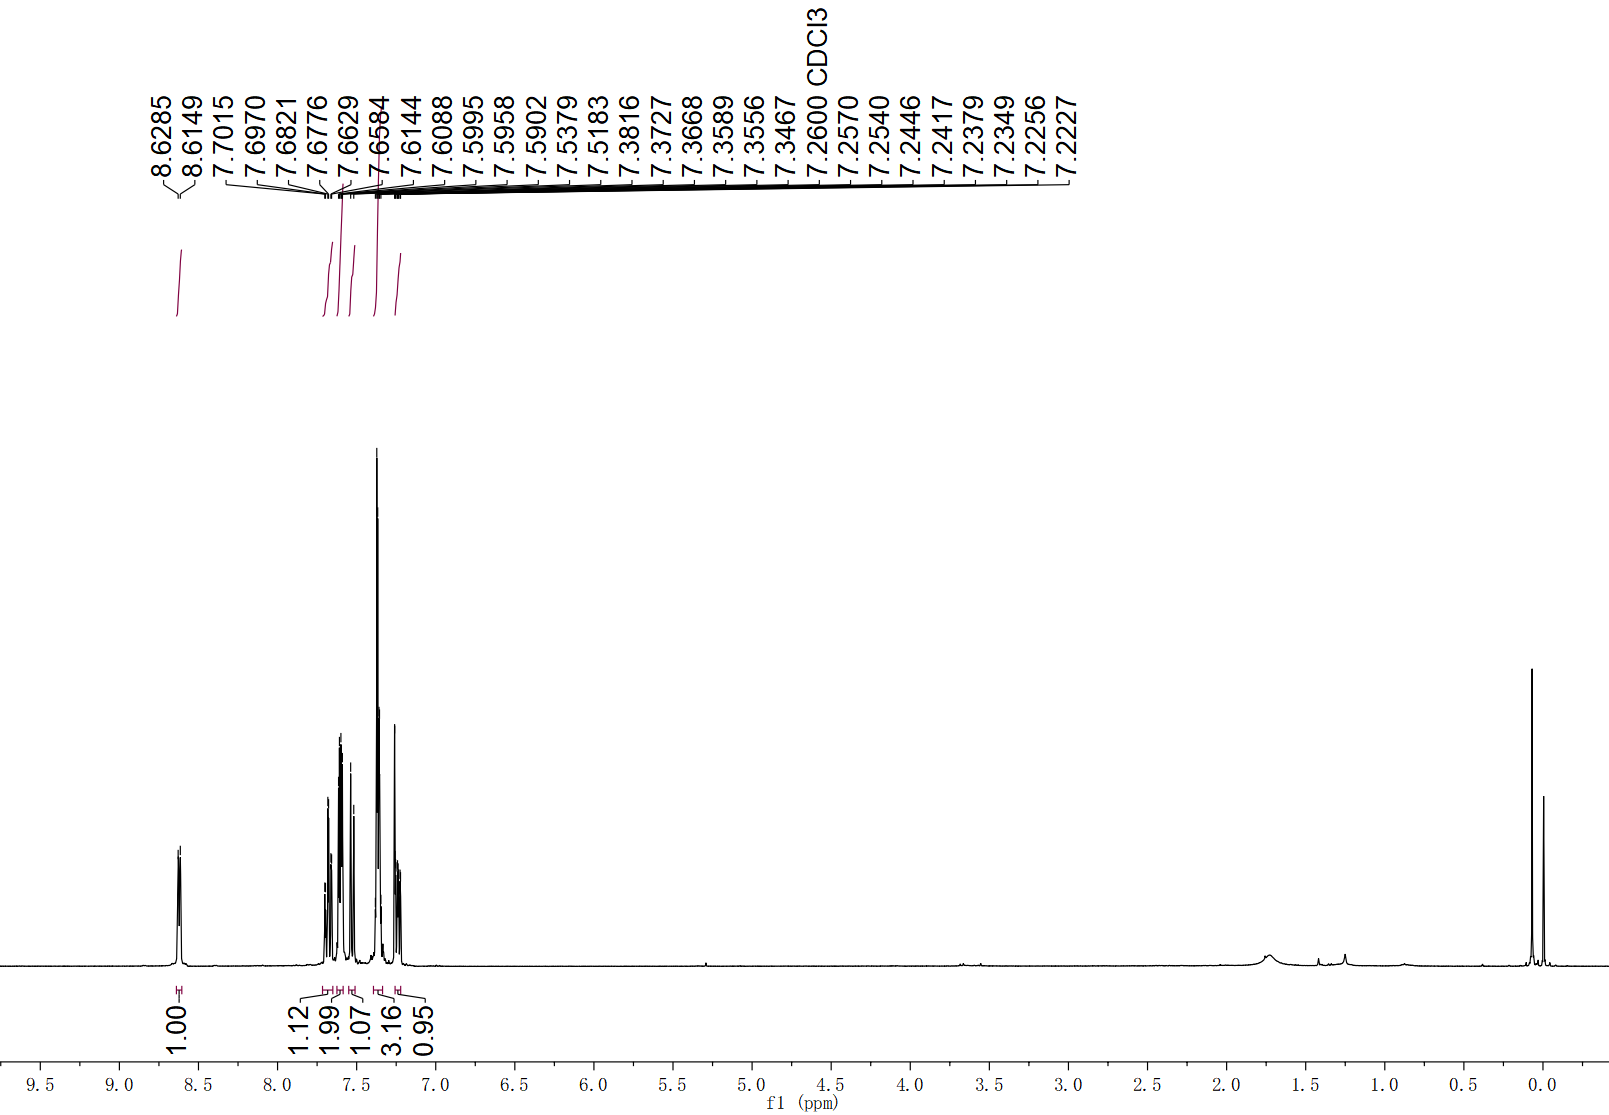


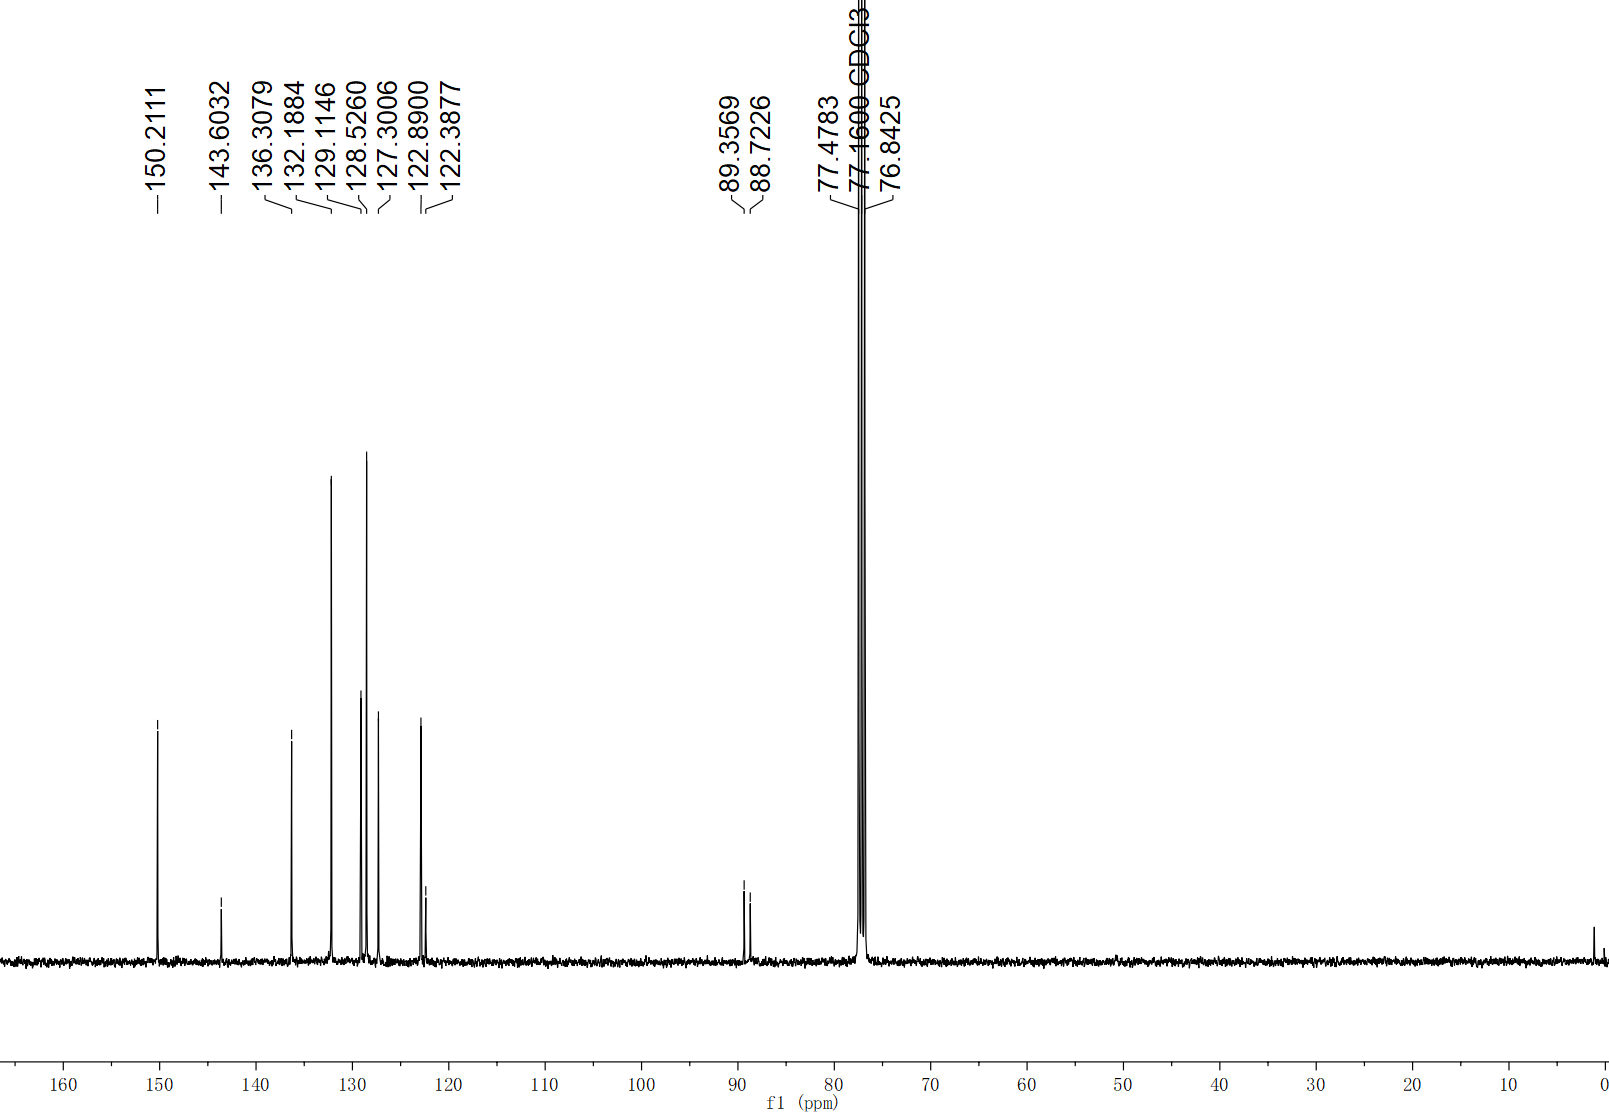


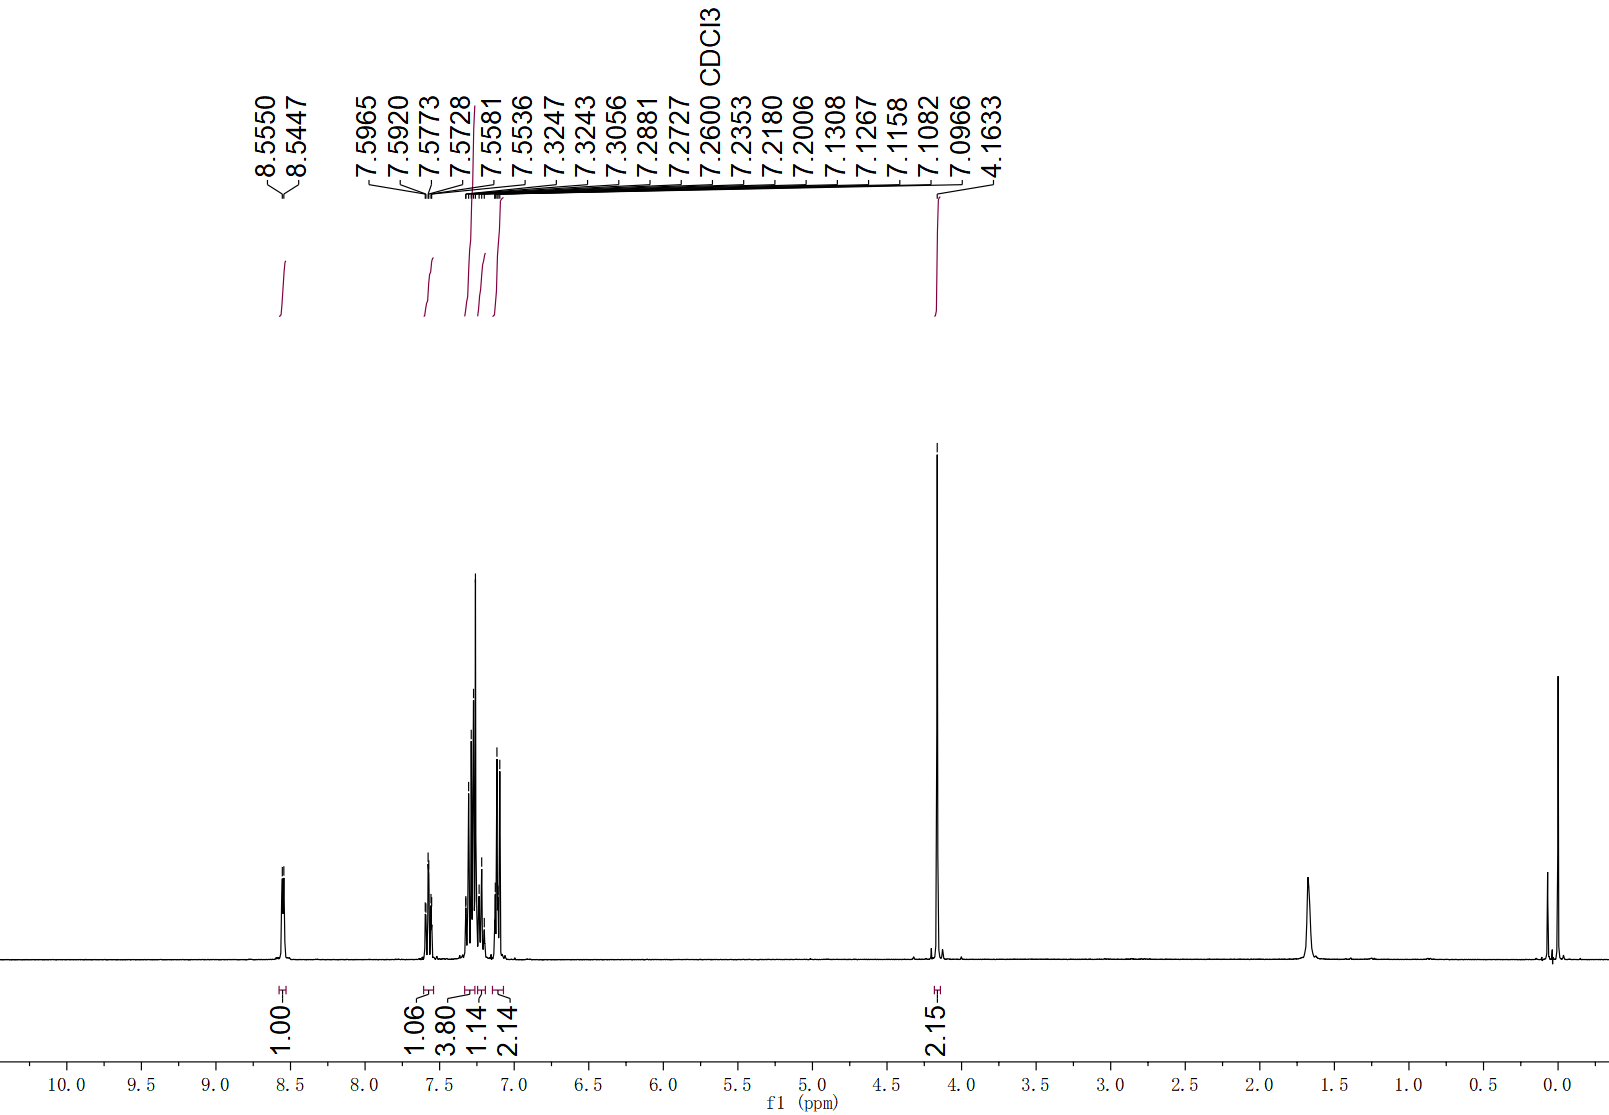


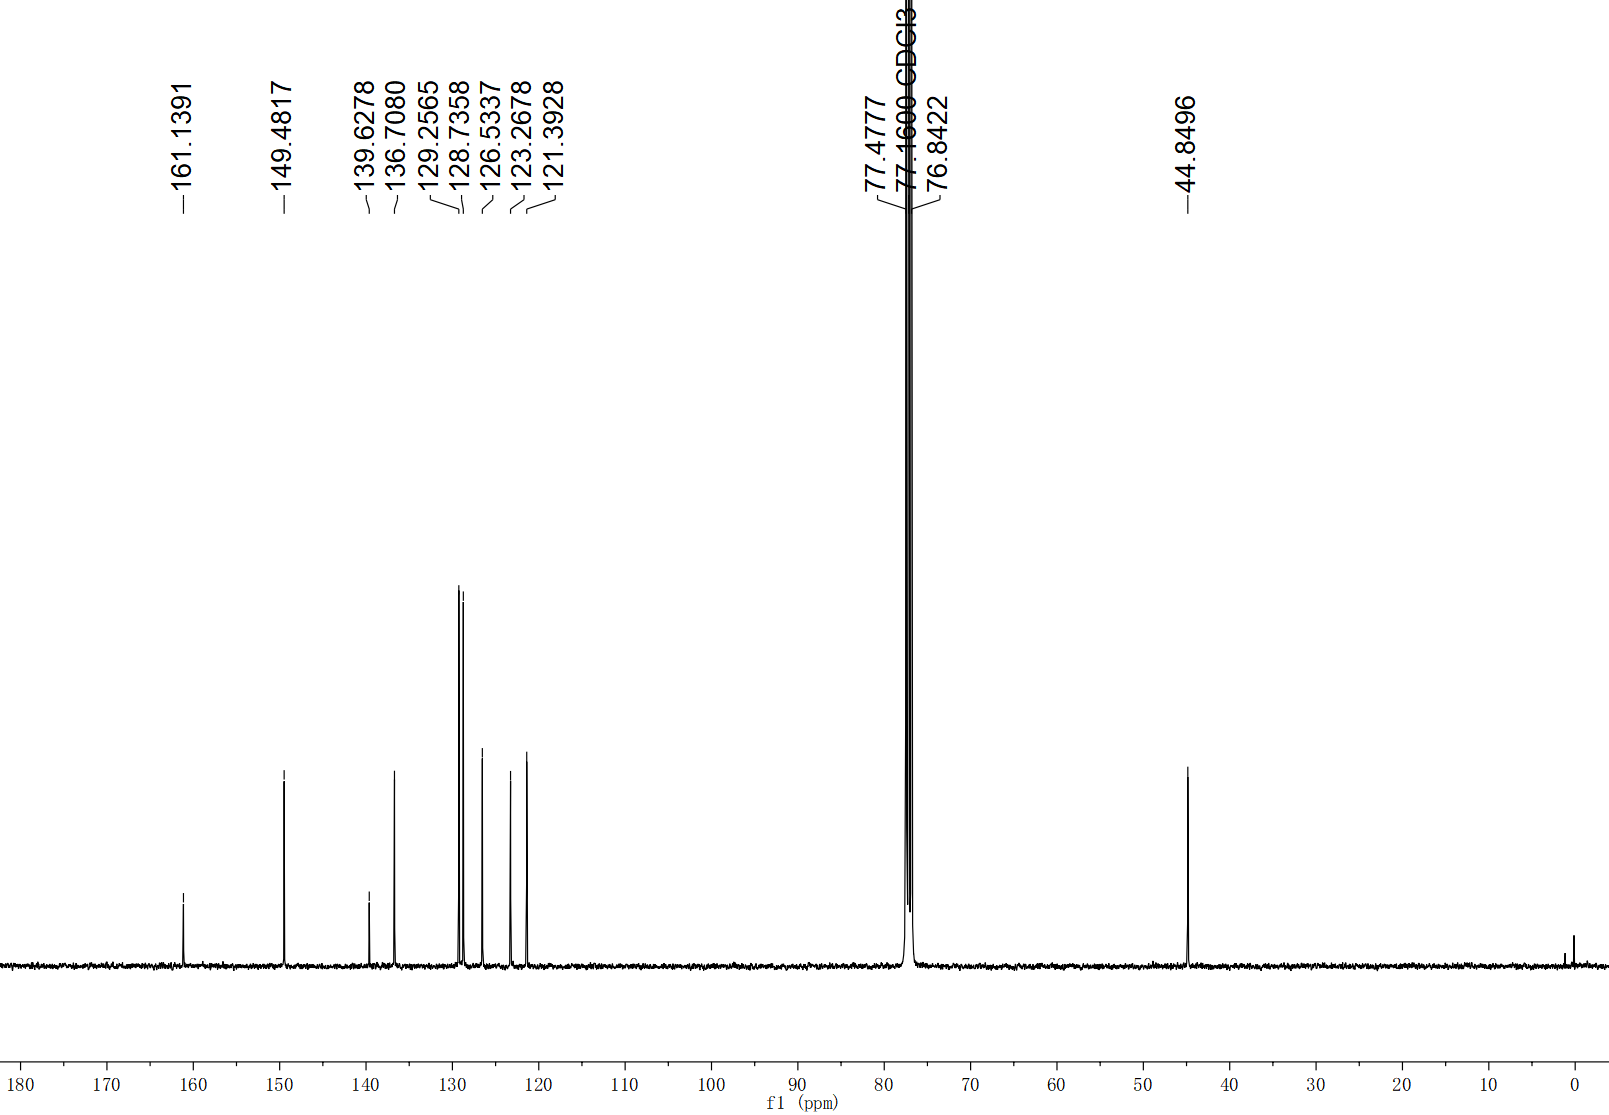


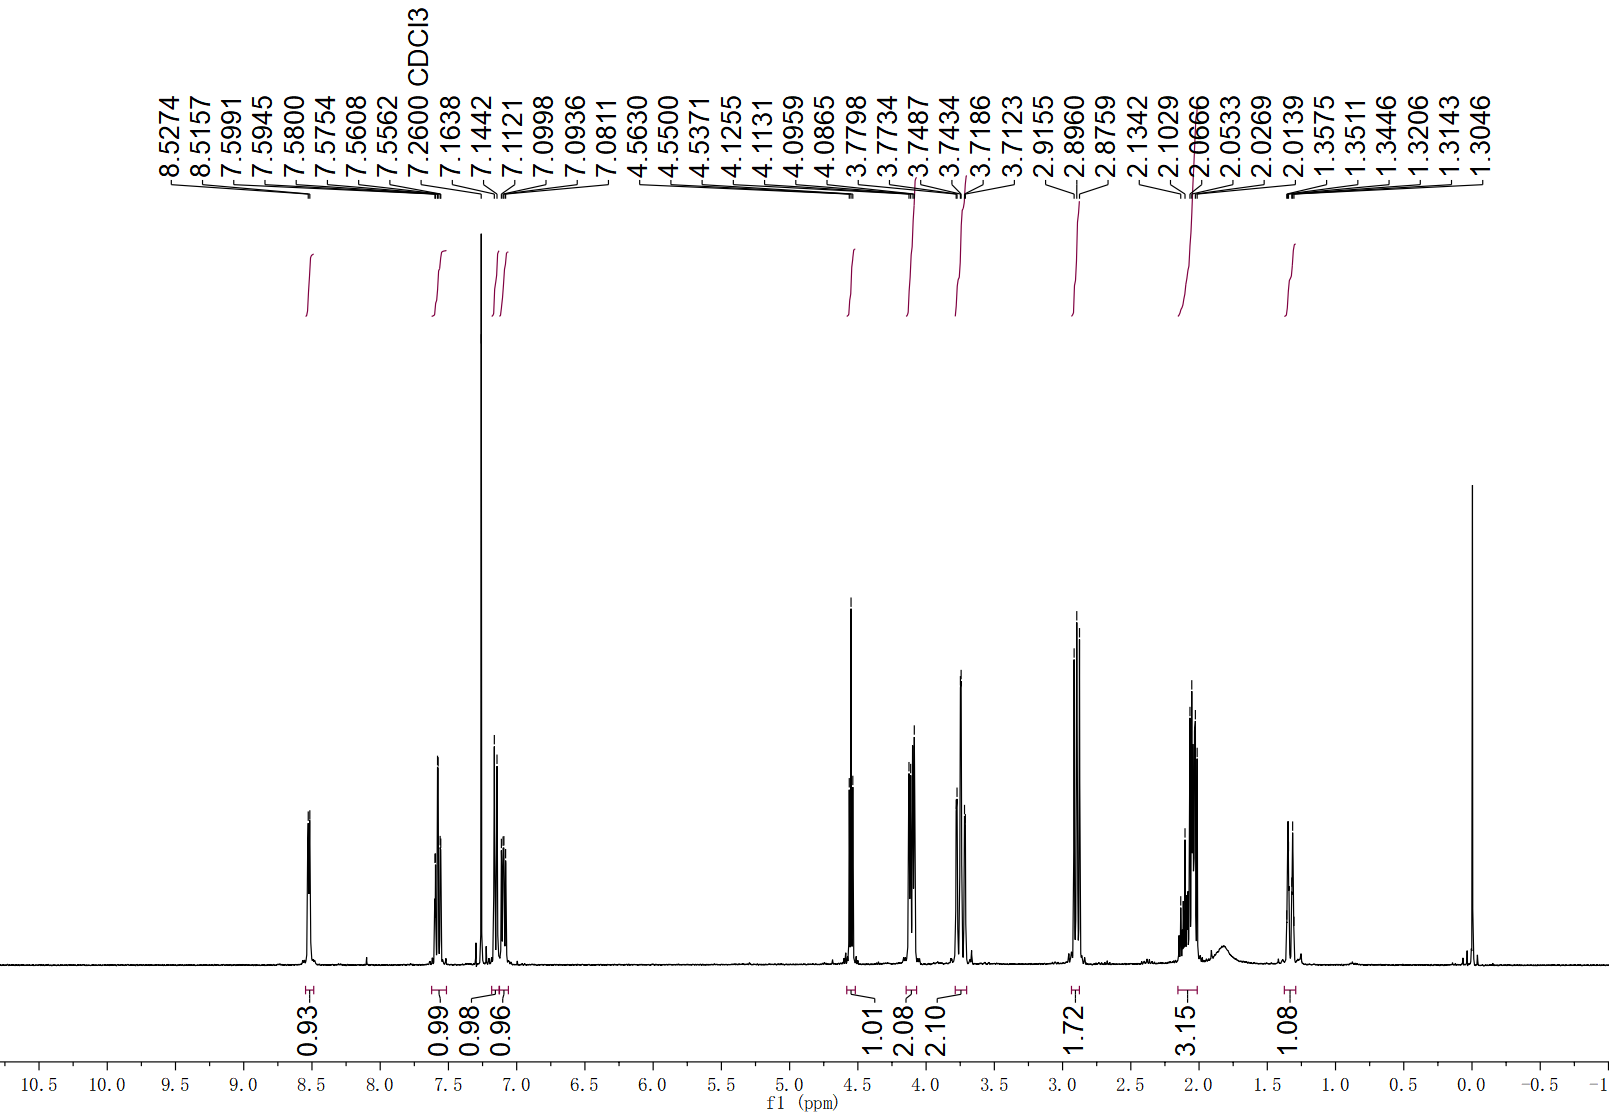


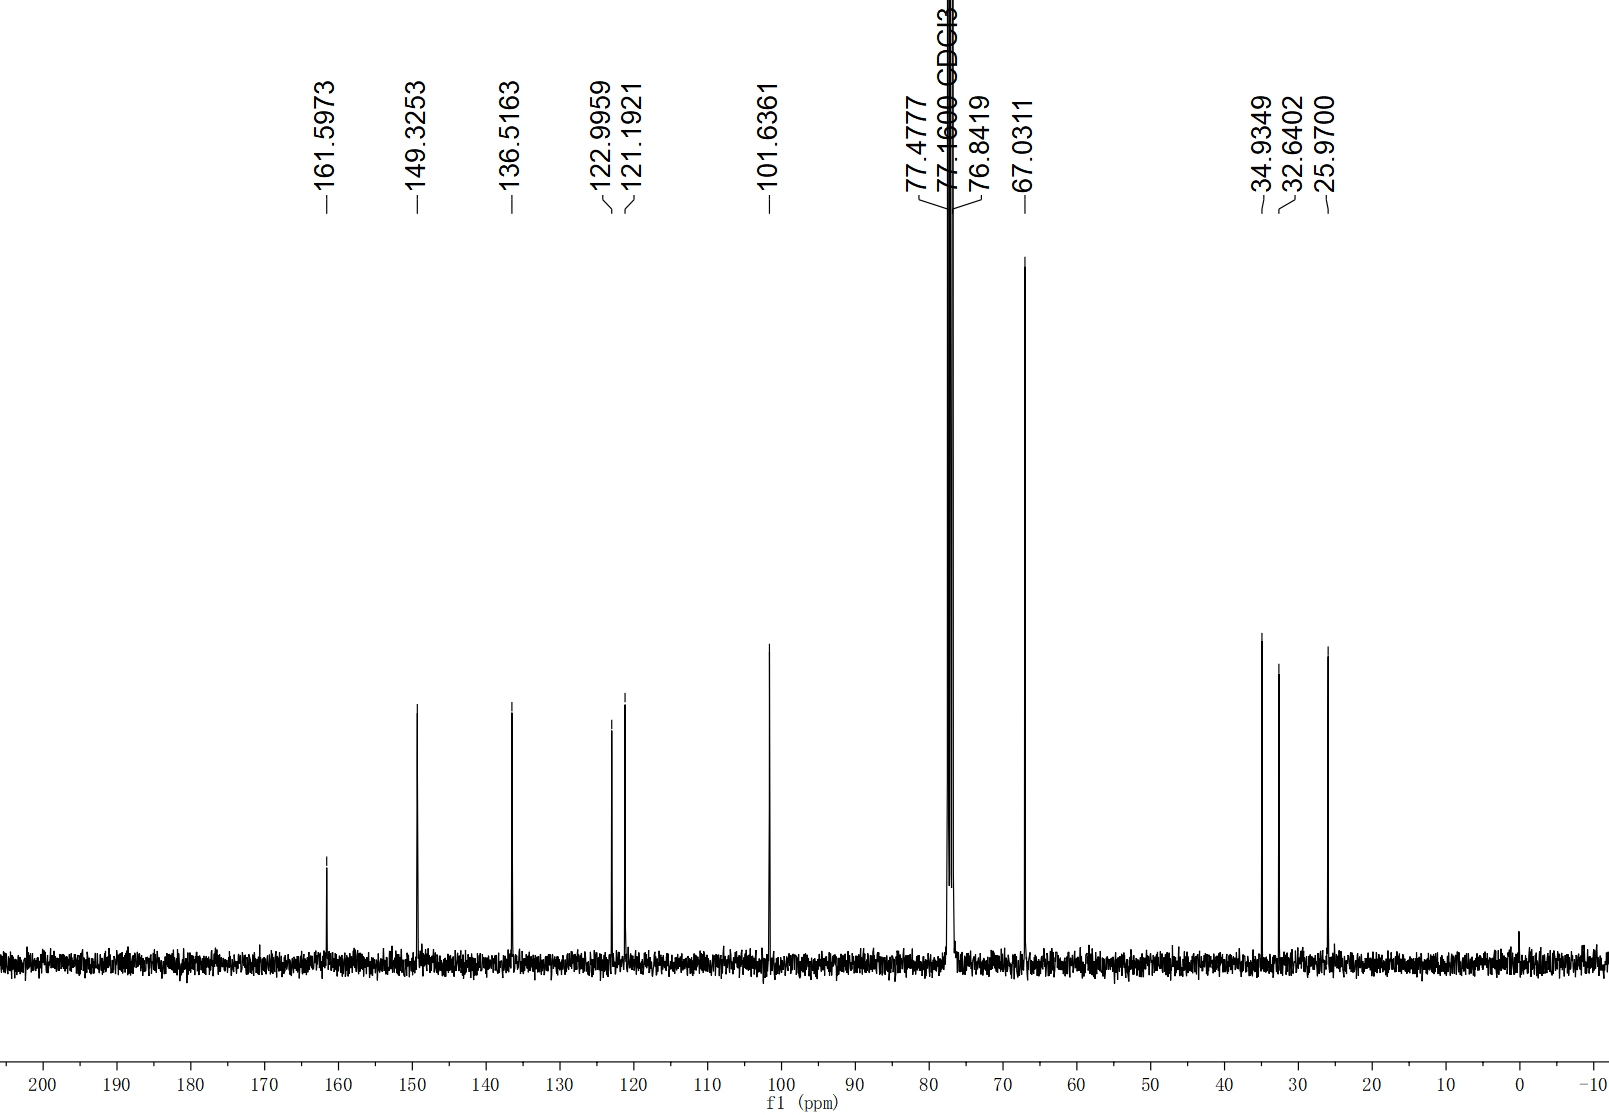


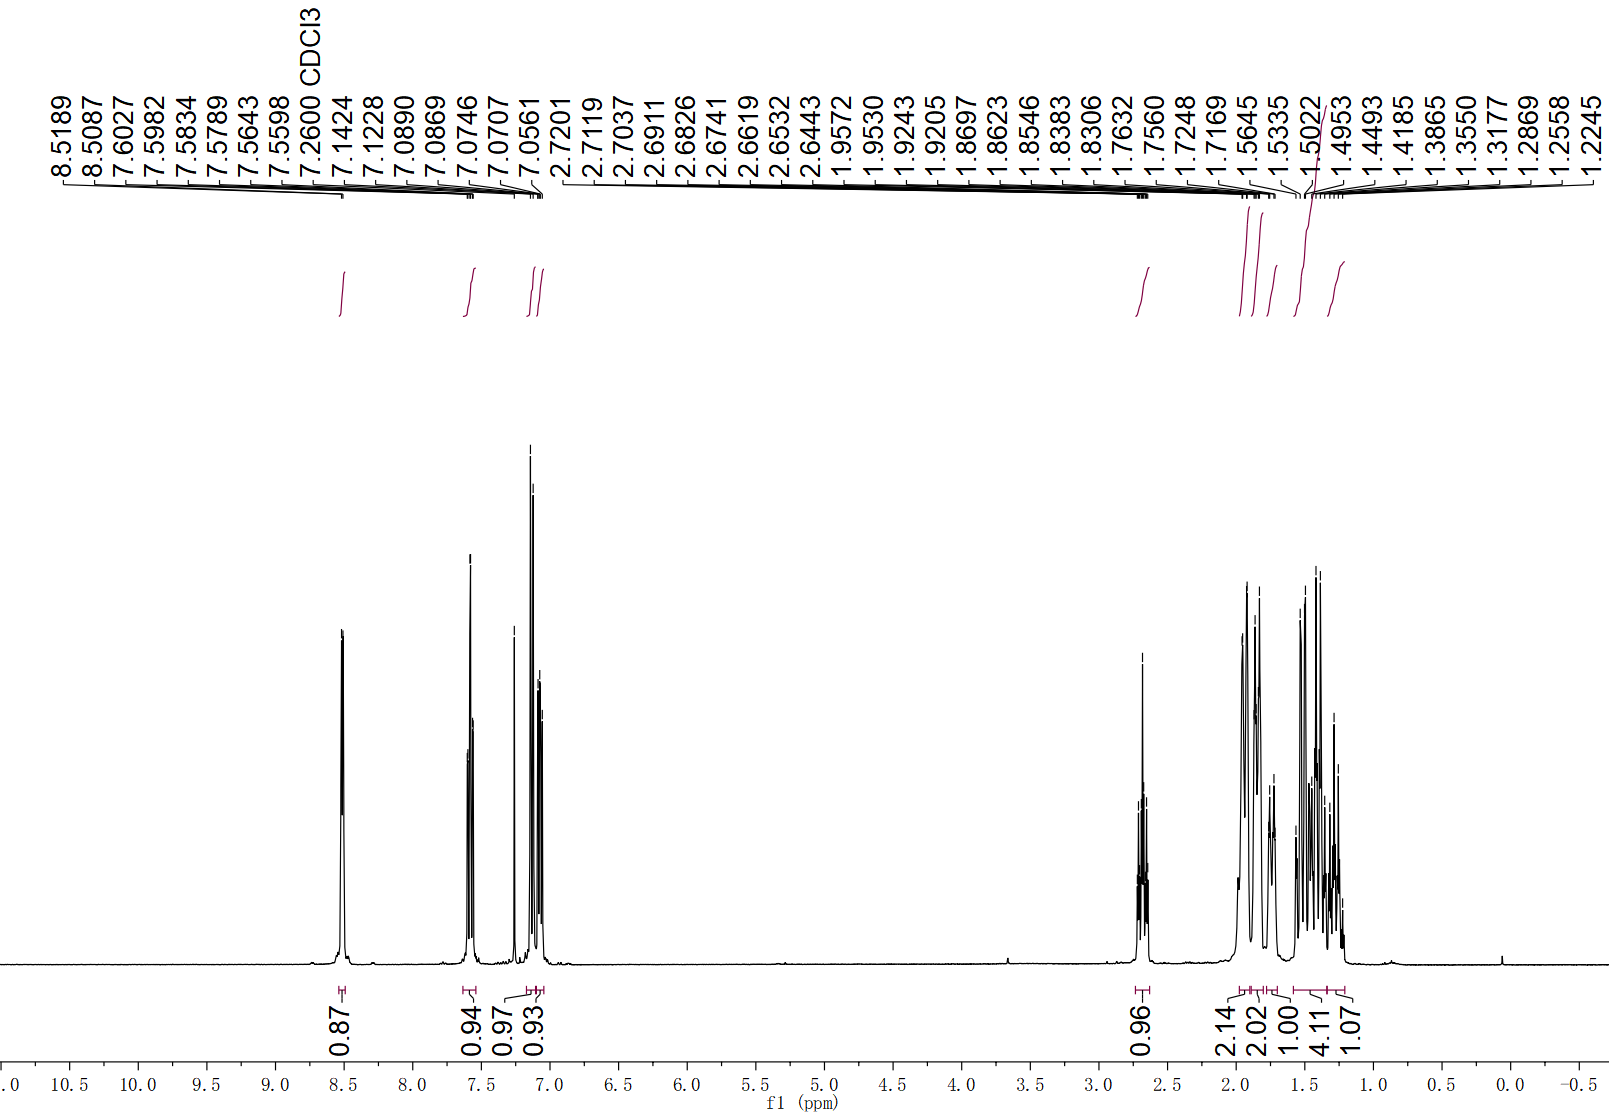


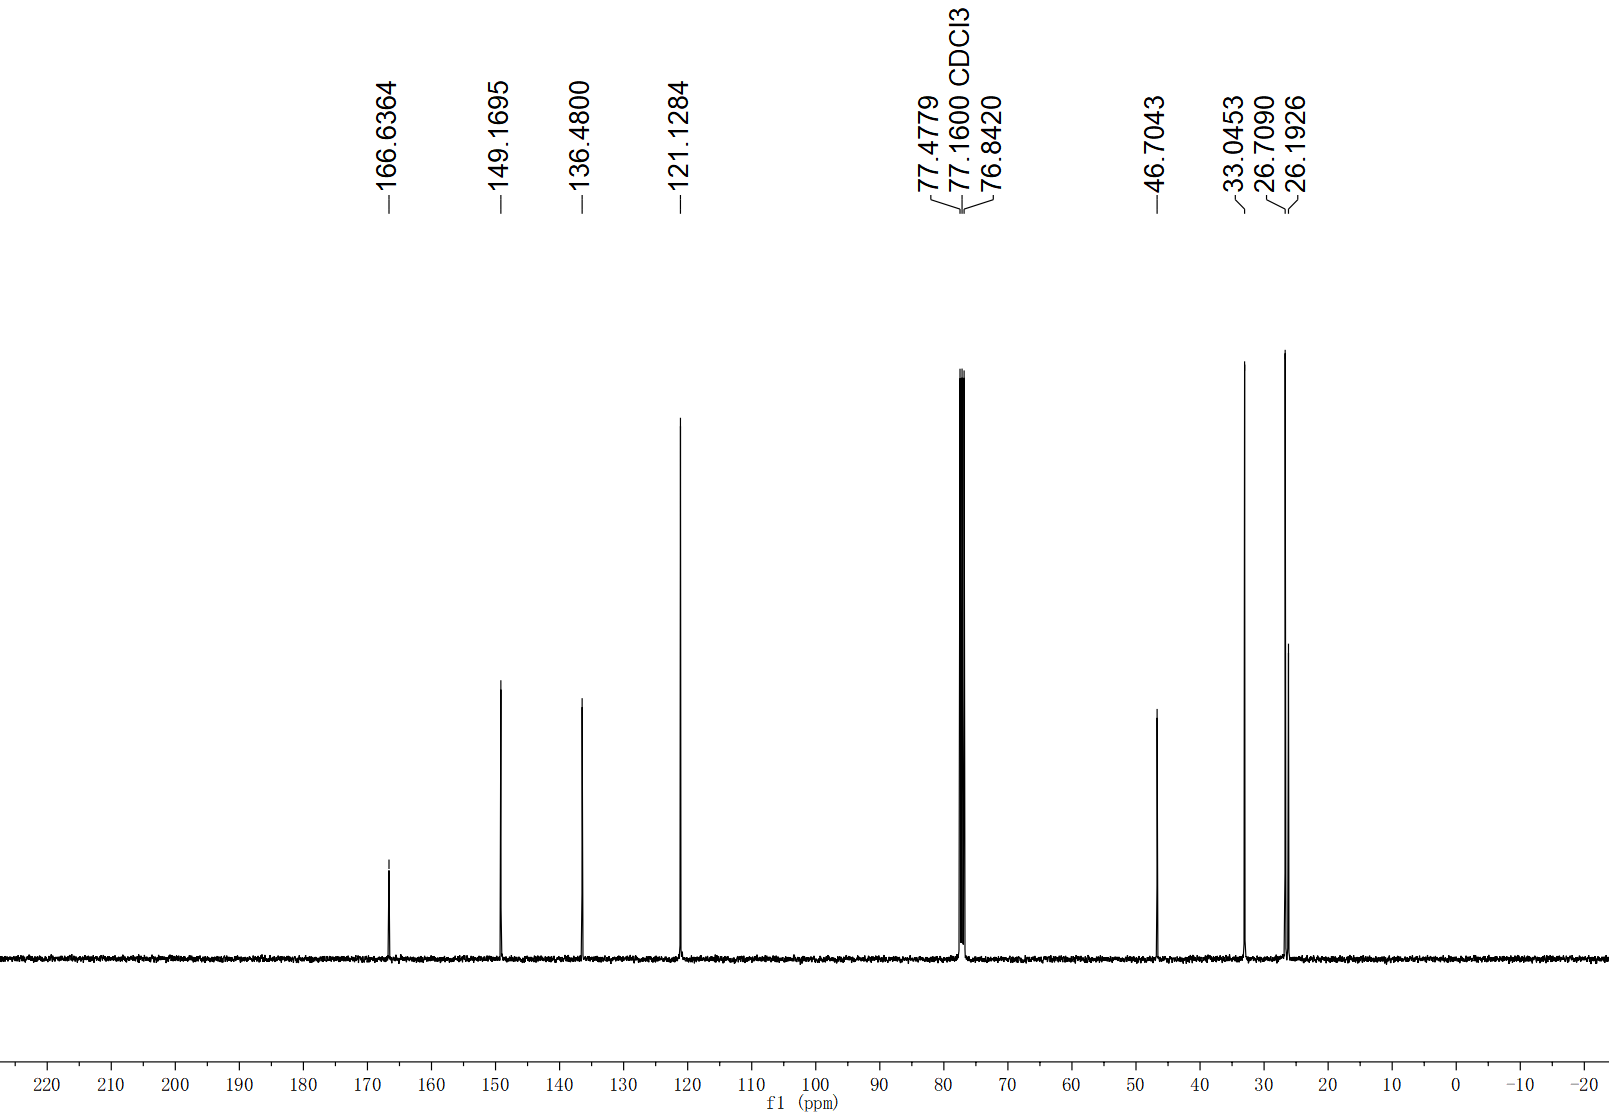


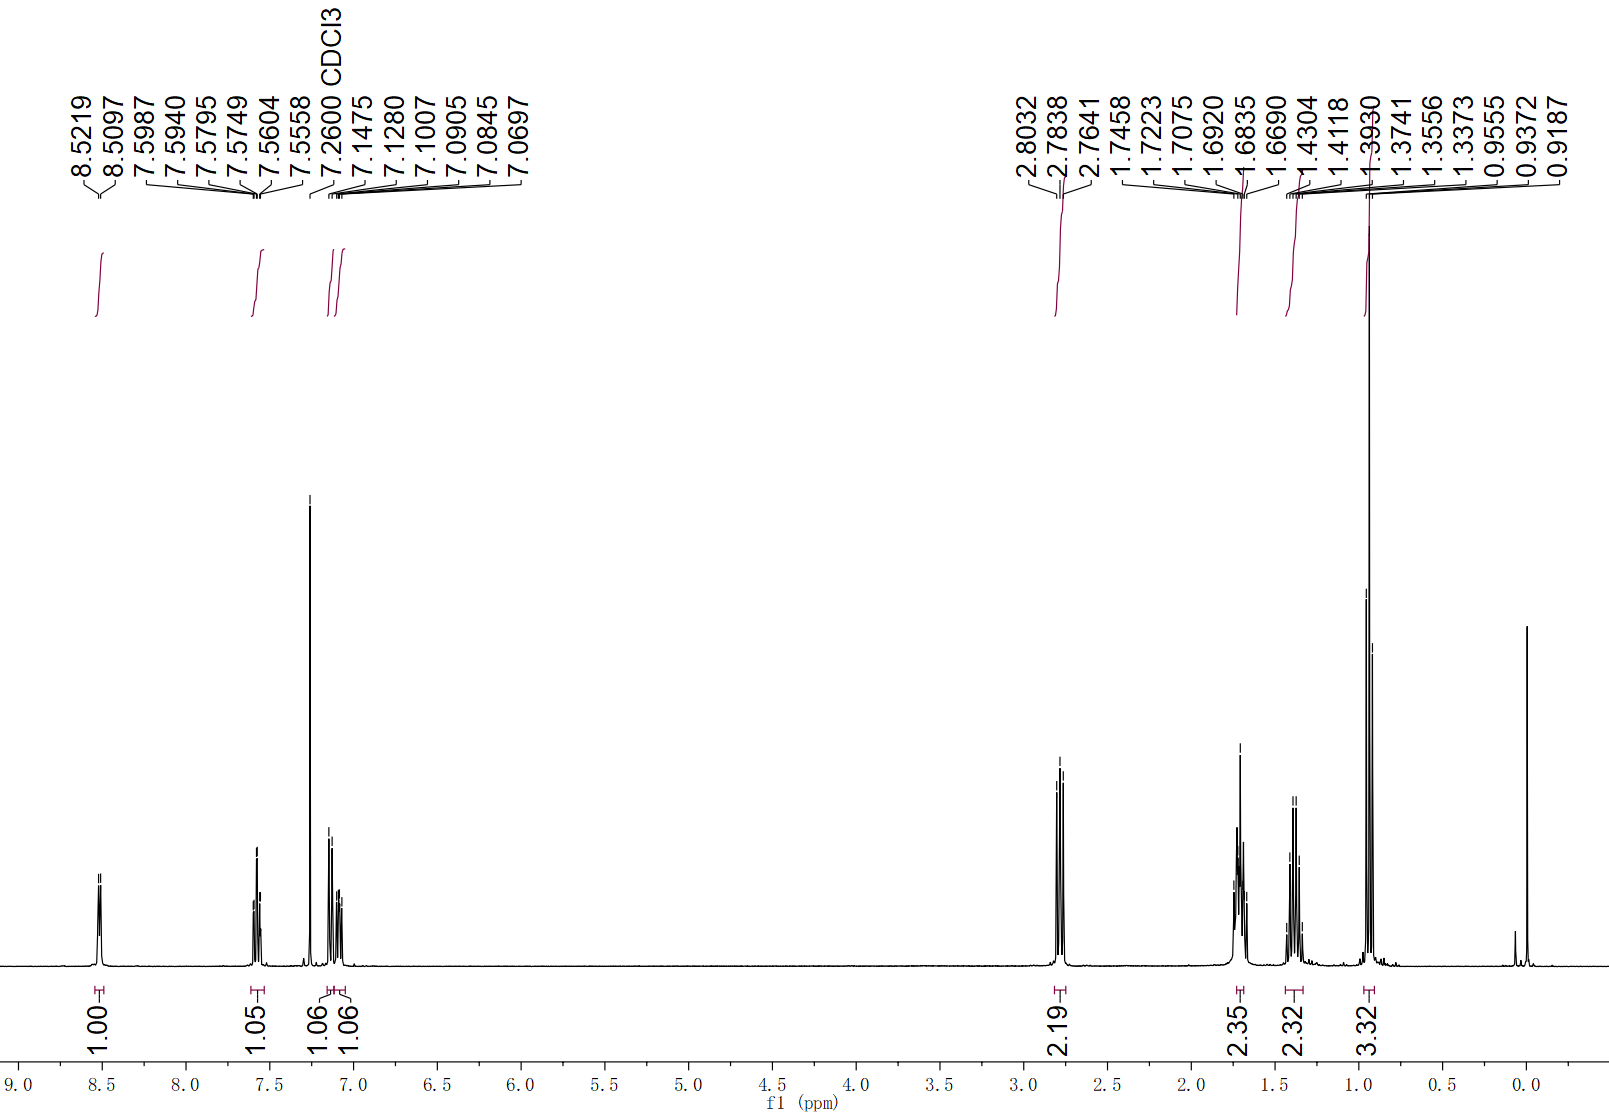


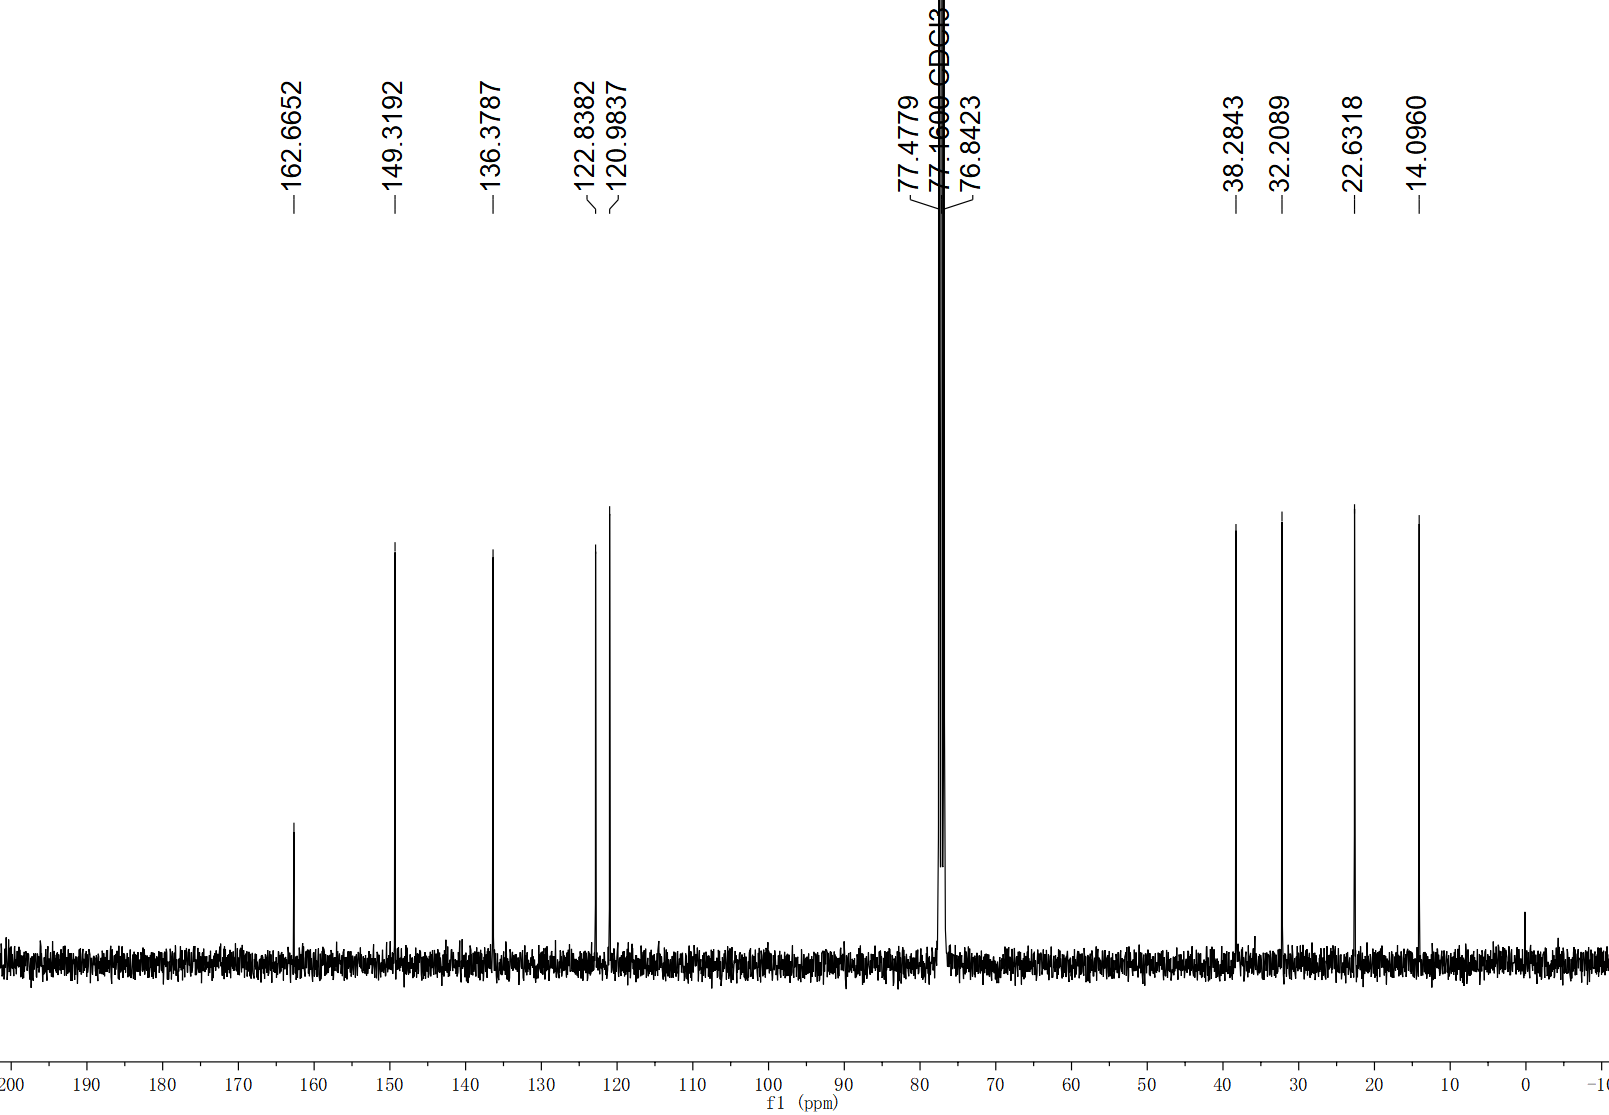


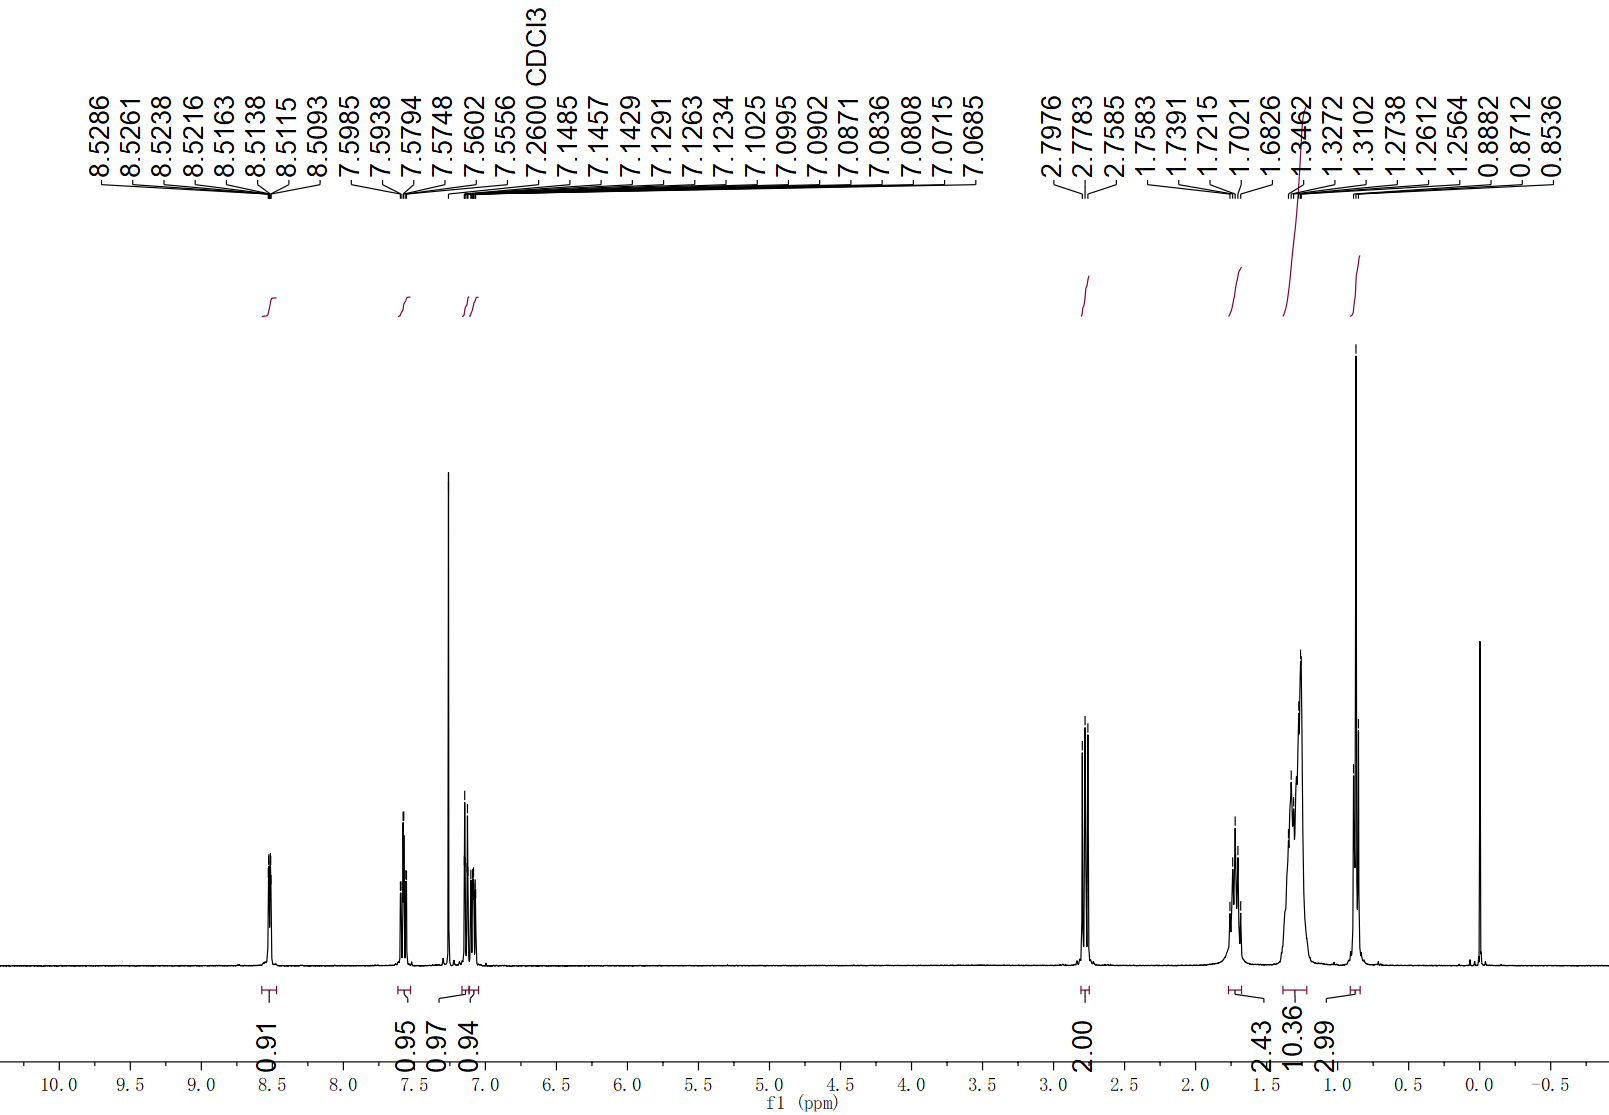


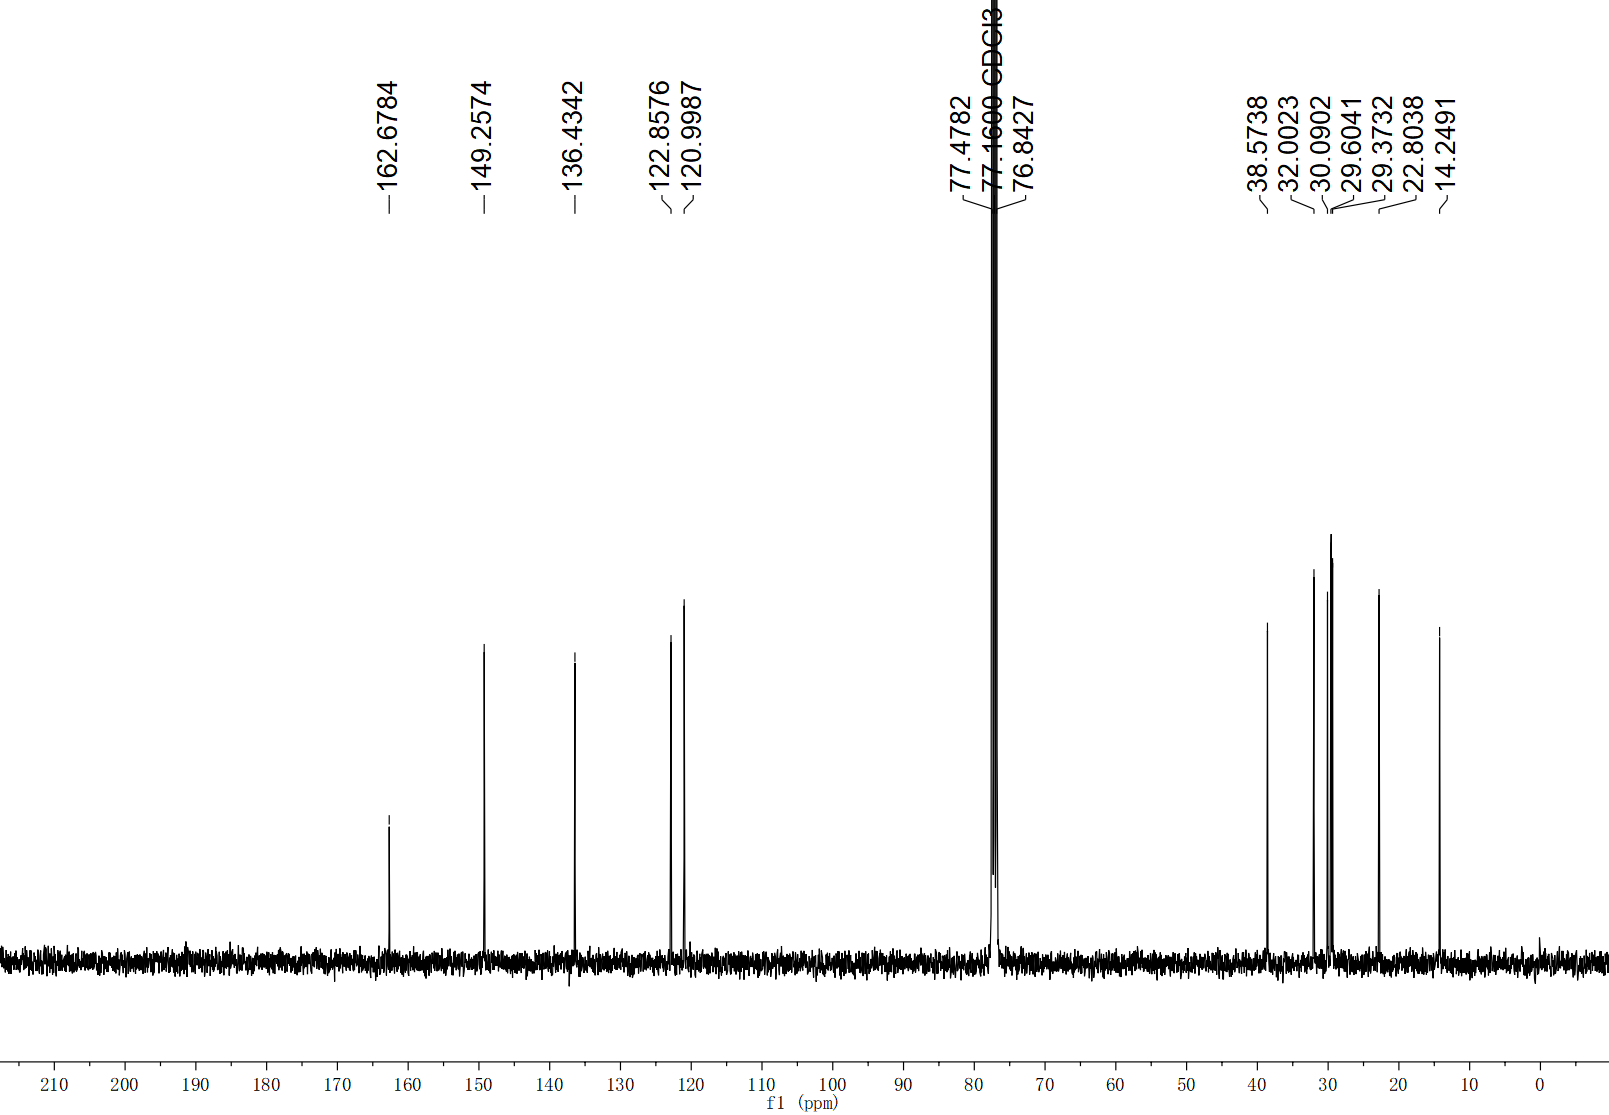


9. Single crystal X-ray diffraction

Single crystal of **5b** for X-ray diffraction was grown by liquid-liquid diffusion in a n-hexane/DCM binary solvent system in a 10 mL screw cap vial at room temperature. The X-ray date of **5b** is deposited in the Cambridge Crystallographic Data Centre with a number of CCDC 2391609.

(thermal ellipsoids are drawn at 50% probability)

**Supplementary Figure 1.** ORTEP representation of the X-ray structure of **5b**

**Supplementary Table 1.** Crystal data and structure refinement for **5b**

10. Reference

1. Kanyiva, K. S., Nakao, Y. & Hiyama, T. Nickel-catalyzed addition of pyridine-*N*-oxides across alkynes. *Angew. Chem. Int. Ed.* **46**, 8872–8874 (2007).
2. Wang, Y. et al. Iron-catalyzed contrasteric functionalization of allenic C (sp2)–H bonds: synthesis of α-aminoalkyl 1,1-disubstituted allenes. *J. Am. Chem. Soc.* **143**, 14998–15004 (2021).
3. Gao, H. et al. Rapid heteroatom transfer to arylmetals utilizing multifunctional reagent scaffolds. *Nat. Chem.* **9**, 681–688 (2017).
4. Xu, Z., Chen, H., Wang, Z., Ying, A. & Zhang, L. One-pot synthesis of benzene-fused medium-ring ketones: gold catalysis-enabled enolate umpolung reactivity. *J. Am. Chem. Soc.* **138**, 5515–5518 (2016).
5. Boudry, E., Bourdreux, F., Marrot, J., Moreau, X. & Ghiazza, C. Dearomatization of pyridines: photochemical skeletal enlargement for the synthesis of 1,2-diazepines. *J. Am. Chem. Soc.* **146**, 2845–2854 (2014).
6. Zhao, B., Tan, H., Chen, C., Jiao, N. & Shi, Z. Photoinduced C–C Bond Cleavage and Oxidation of Cycloketoxime Esters. *Chin. J. Chem.* **36**, 995–999 (2016).
7. Heier, R. F. Synthesis and biological activities of (*R*)-5,6-dihydro-*N*,*N*-dimethyl-4*H*-imidazo [4,5,1-*Ij*] quinolin-5-amine and its metabolites. *J. Med. Chem.* **40**, 639–646 (1997).
8. Dey A. & Hajra, A. Potassium persulfate-mediated thiocyanation of 2*H*-indazole under iron-catalysis. *Adv. Synth. Cat.* **361**, 842–849 (2019).
9. Frisch, M. J. et al. Gaussian 09, revision A.1; Gaussian, Inc.: Wallingford, CT (2009).
10. Zhao, Y. & Truhlar, D. G. *Theor. Chem. Acc.* **120**, 215–241 (2008).
11. Marenich, A. V., Cramer, C. J. & Truhlar, D. G. *J. Phys. Chem. B.* **113**, 6378–6396 (2009).
12. Legault, C. Y. CYL View 1.0b, Universite de Sherbrooke, Sherbrooke, Quebec, Canada (2009).
